# Supplementary material for: EDA mediated S–N bond coupling of nitroarenes and sodium sulfinate salts
Source: Royal Society of Chemistry journal article supplement (doi:10.1039/d2sc06087f), 2022-12-15

## SUPPORTING INFORMATION

# EDA Mediated S-N Bond Coupling of Nitroarenes and Sodium Sulfinates

Juan D. Lasso<sup>a,†</sup>, Durbis J. Castillo-Pazos<sup>a,†</sup>, Malcolm Sim<sup>a</sup>, Joaquín Barroso-Flores<sup>b</sup>, and Chao-Jun Li<sup>a,\*</sup>

Department of Chemistry and FQRNT Centre for Green Chemistry and Catalysis, McGill University, 801 Sherbrooke St. W., Montreal, Quebec H3A 0B8 (Canada) E-mail: cj.li@mcgill.ca

### Table of Contents

|                                                                                      |    |
|--------------------------------------------------------------------------------------|----|
| <b>1. General experimental procedures:</b> .....                                     | 2  |
| <b>2. General procedure for the synthesis of <i>N</i>-hydroxylsulfonamides</b> ..... | 2  |
| <b>3. Single-crystal X-Ray Diffraction of 3f</b> .....                               | 3  |
| <b>4. Mechanistic evidence</b> .....                                                 | 5  |
| GC/MS Data: .....                                                                    | 5  |
| GC/TCD Data .....                                                                    | 6  |
| <b>5. Computational details:</b> .....                                               | 7  |
| <b>6. Characterization data of reported compounds:</b> .....                         | 14 |
| <b>7. References</b> .....                                                           | 21 |
| <b>8. Spectra collection</b> .....                                                   | 22 |

## 1. General experimental procedures:

Solvents and reagents were purchased from Sigma-Aldrich and Fisher scientific chemical companies and were used without further purification unless otherwise specified.  $^1\text{H}$  and  $^{13}\text{C}$  NMR were recorded on Bruker 500 MHz spectrometers, which uses the deuterium lock signal to reference the spectra. The solvent residual peaks, e.g., of chloroform ( $\text{CDCl}_3$ :  $\delta$  7.26 ppm and  $\delta$  77.23 ppm), were used as references. Data are reported as follows: multiplicity (s = singlet, d = doublet, t = triplet, q = quartet, quint = quintet, m = multiplet, dd = doublet of doublet, etc), coupling constant (J/Hz) and integration. All NMR spectra were recorded at room temperature. High-resolution mass spectrometry was conducted by using atmospheric pressure chemical ionization (APCI) or electro-spraying ionization (ESI) performed by McGill University on a Thermo-Scientific Exactive Orbitrap. Protonated/deprotonated molecular ions ( $\text{M}\pm\text{H}$ )<sup>+</sup> or sodium adducts ( $\text{M}+\text{Na}$ )<sup>+</sup> were used for empirical formula confirmation. All reactions are stirred magnetically unless otherwise specified. Short packed column chromatography was performed with E. Merck silica gel 60 (230–400 mesh) or SORBENT silica gel 30–60  $\mu\text{m}$ . Flash column chromatography was performed with Isolera<sup>TM</sup> Prime advanced automatic flash purification system. Analytical thin layer chromatography (TLC) was performed using Merck silica gel 60 F254 pre-coated plates (0.25 mm). The reactions were conducted in 10x75 fischer culture-tubes and were irradiated utilizing Kessil PR160L 390(54W), 427nm, 440nm (45W) LED lamps. The reactions were conducted in sealed tubes. All the reactions were conducted under inert atmosphere unless otherwise noted.

## 2. General procedure for the synthesis of *N*-hydroxysulfonamides

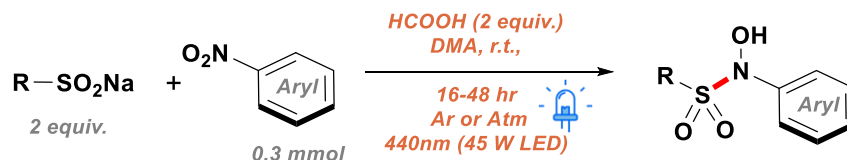

The aromatic substrate (0.3 mmol), the corresponding sulfinate sodium salt (0.6 mmol), and formic acid (0.6 mmol) were added into 1.5 mL of DMA in a glass culture tube capped with a rubber septum. Three freeze-pump-thaw cycles were carefully performed before setting the reaction under light irradiation at 20°C–25°C using a 40 W LED Kessil lamp (440 nm) equipped with a fan. After the reaction was finished (16–48 h), usually evidenced by the loss of yellow coloration in the solution over time, DMA was removed by mildly heating the mixture (30°C–40°C) under a constant stream of air. The remaining mixture of solids was then dissolved in acetone and sonicated, before proceeding to filter the remaining sulfinate salts through a small celite plug. This solution was then evaporated under reduced pressure and the product purified through column chromatography or preparative TLC.

While most aromatic substrates were commercially available, the triflate derivative featured in **3q** was obtained from the corresponding phenol according to Jiang et al.<sup>1</sup> Starting

materials for 3w and 3x were obtained from the corresponding carboxylic acids according to et al. Lastly, starting materials for 3y and 3z were obtained from the corresponding acyl chlorides according to Najer, et al.<sup>2</sup> and Wang, et al.<sup>3</sup>, correspondingly

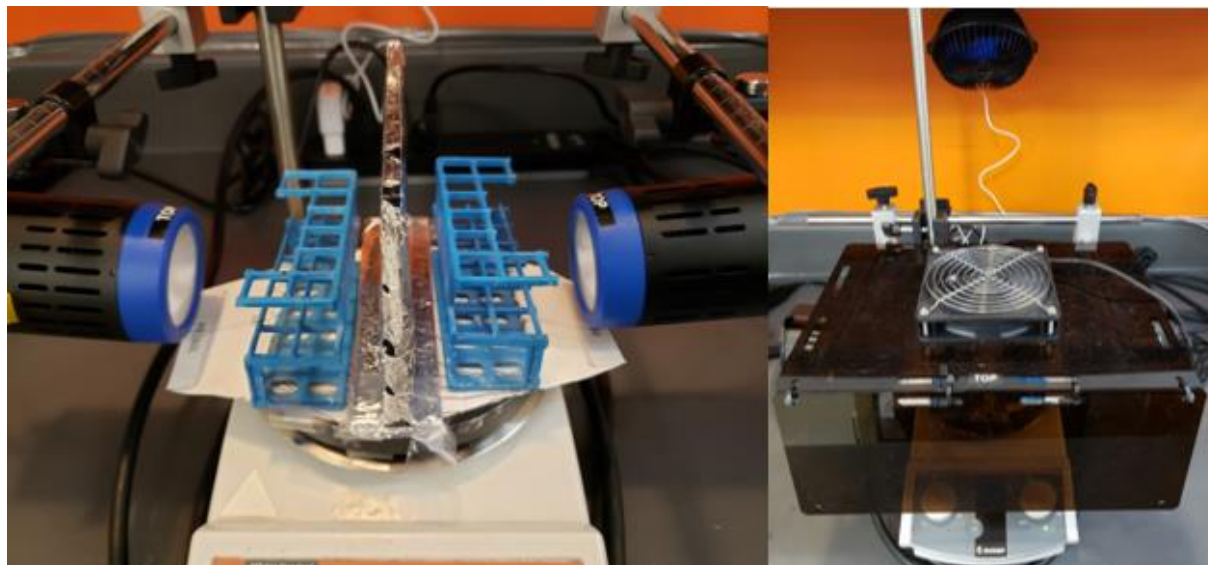

Left: close-up of the Kessil lamp setup, allowing for multiple reactions at the same time, all absorbing around 200000 mW/cm<sup>2</sup>. Right: Covered setup and the two auxiliary fans to keep the temperature below 25°C.

### 3. Single-crystal X-Ray Diffraction of 3f

Product was recrystallized from methanol over the course of 3 days at 4°C to yield colorless needles. A Bruker D8 Advance powder X-ray diffractometer was used for the structure refinement and collection of the following crystal data:

|                                                                                  |                                                                                        |
|----------------------------------------------------------------------------------|----------------------------------------------------------------------------------------|
| Empirical formula: C <sub>8</sub> H <sub>8</sub> N <sub>2</sub> O <sub>3</sub> S | Crystal size/mm <sup>3</sup> 0.353 × 0.272 × 0.203                                     |
| Formula weight: 212.22                                                           | Radiation CuKα (λ = 1.54178)                                                           |
| Temperature/K: 298(2)                                                            | 2θ range for data collection/° 11.764 to 144.608                                       |
| Crystal system: monoclinic                                                       | Index ranges -10 ≤ h ≤ 10, -4 ≤ k ≤ 6, -25 ≤ l ≤ 13264                                 |
| Space group: P2 <sub>1</sub> /n                                                  | Reflections collected: 13264                                                           |
| a/Å: 8.2861(15)                                                                  | Independent reflections: 1809 [R <sub>int</sub> = 0.0341, R <sub>sigma</sub> = 0.0228] |
| b/Å: 5.4731(10)                                                                  | Data/restraints/parameters: 1809/0/130                                                 |
| c/Å: 20.821(4)                                                                   |                                                                                        |
| α/°: 90, β/°: 93.606(5), γ/°: 90                                                 |                                                                                        |

|                                            |                                                                               |
|--------------------------------------------|-------------------------------------------------------------------------------|
| Volume/Å <sup>3</sup> : 942.4(3)           | Goodness-of-fit on F2: 1.088                                                  |
| Z: 4                                       | Final R indexes [I>=2σ (I)] R <sub>1</sub> = 0.0338, wR <sub>2</sub> = 0.0920 |
| ρ <sub>calc</sub> /cm <sup>3</sup> : 1.496 | Final R indexes [all data] R <sub>1</sub> = 0.0342, wR <sub>2</sub> = 0.0925  |
| μ/mm <sup>-1</sup> : 2.951                 | Largest diff. peak/hole / e Å <sup>-3</sup> 0.20/-0.26                        |
| F(000): 440.0                              |                                                                               |

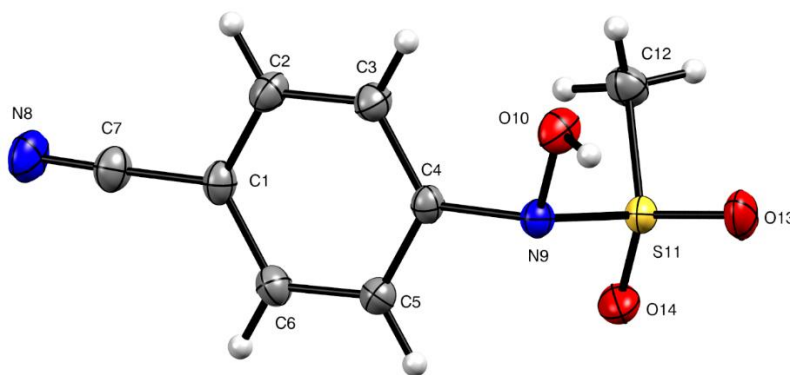

## 4. Mechanistic evidence

GC/MS Data:

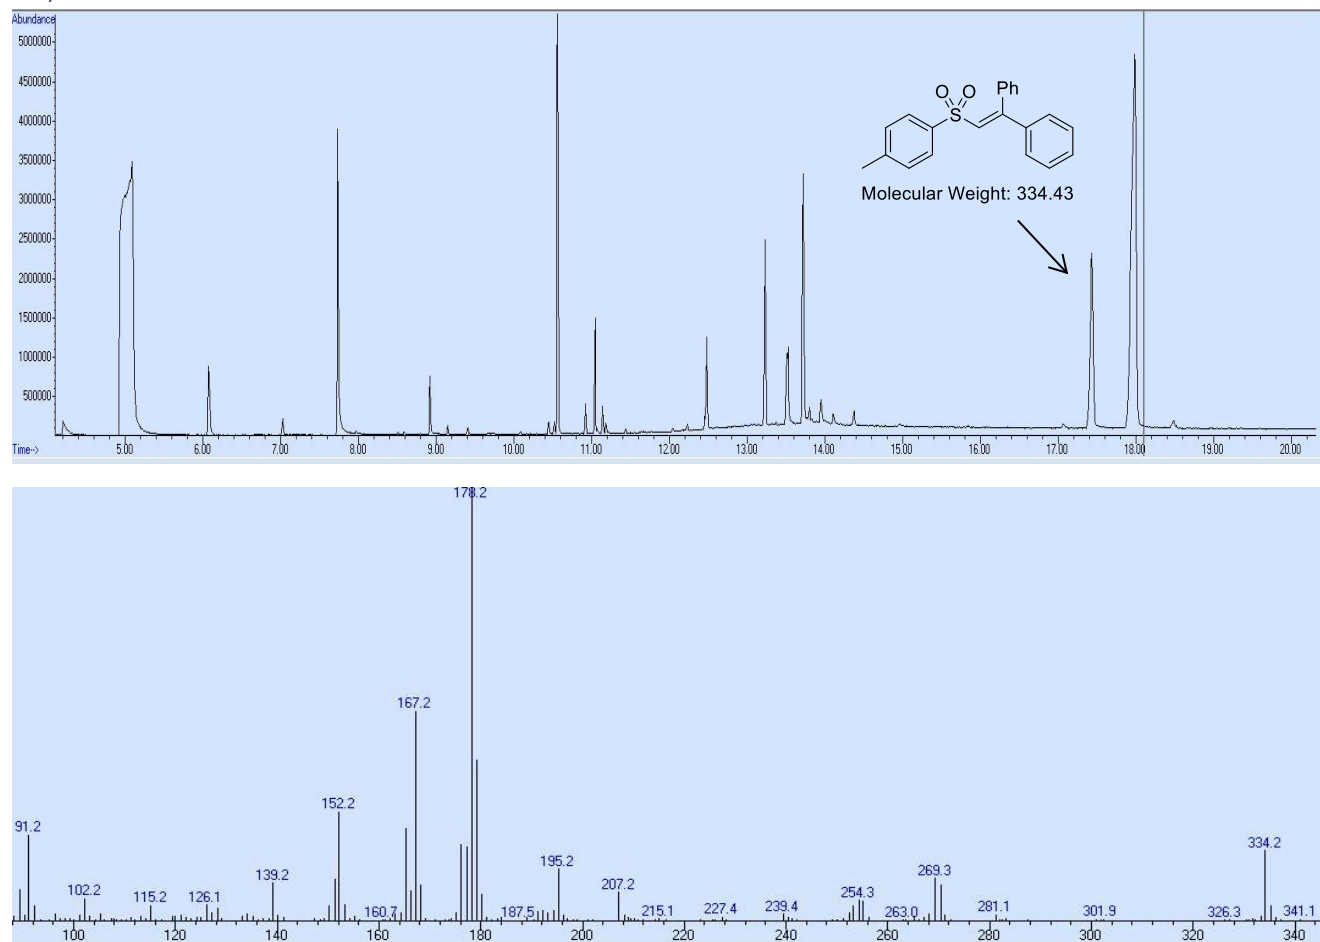

Top: Reaction chromatogram for Sodium Toluene sulfinate. Bottom: Mass Spectrum of radical addition product.

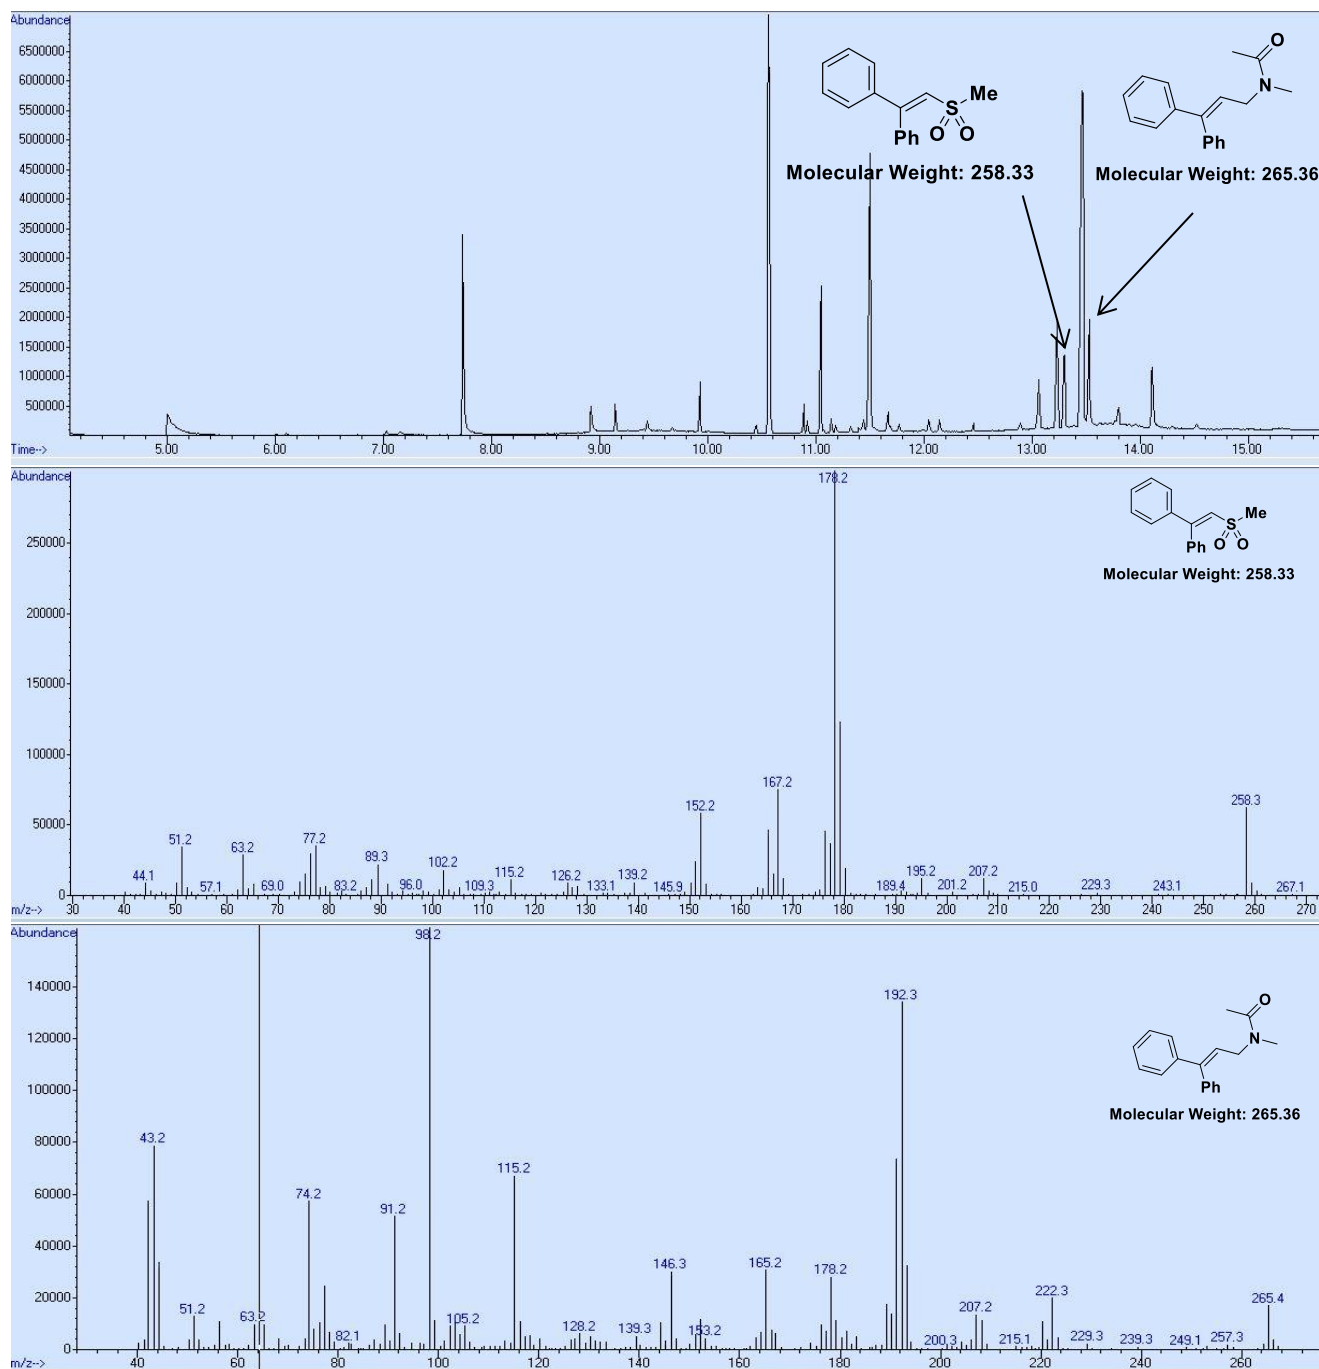

Top: Reaction chromatogram for Sodium Methane sulfinate. Middle: Mass Spectrum of radical addition product. Bottom: Radical adduct of solvent

### GC/TCD Data

The headspace gas of a standard 0.1 mmol sulfonamidation reaction of para-chloronitrobenzene left to react for 16 hours was syringed out and directly inserted into GC/TCD. Raw data was imported and plotted in OriginPro 2022. Analysis and identification of response peaks was conducted by cross referencing standard values generously provided by the McGill Electrocatalysis Laboratory.

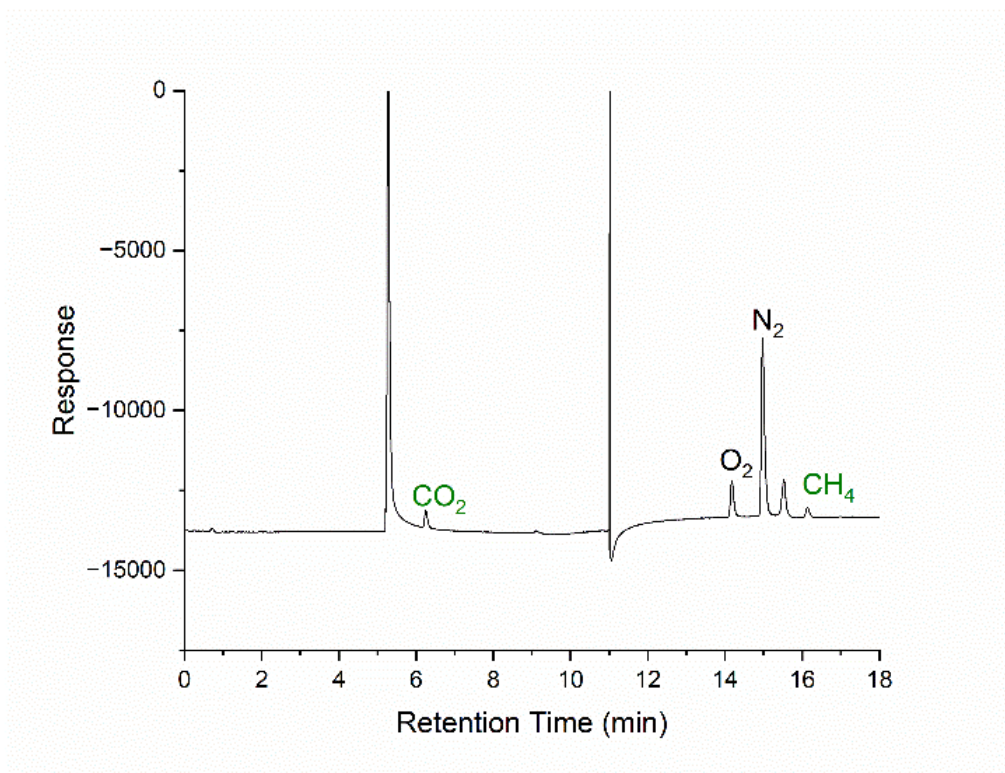

Left: plot of the GC/TCD trace obtained from headspace of standard optimized conditions.

## 5. Computational details:

All calculations were carried out with the Gaussian 16 suite of programs, at the  $\omega$ B97XD/cc-pVTZ level of theory. Natural Population Analysis was carried out with the NBO3.1 program<sup>4</sup> as provided with the previously mentioned suite. In every calculation the Polarizable Continuum Model (PCM) solvation model was used (solvent = N,N-dimethylacetamide, DMA). Atomic populations were added within each molecular fragment in the ground and the excited state, the difference was then ascribed to the electron transfer from donor to acceptor in the complex.

### Calculated excited states, orbital compositions, and oscillator strengths for each excited state

**Conformation a** (Excited State 8 was selected for population analysis on the basis of their oscillator strength value)

#### Excitation energies and oscillator strengths:

|                  |           |           |           |          |                               |
|------------------|-----------|-----------|-----------|----------|-------------------------------|
| Excited State 1: | Singlet-A | 3.1085 eV | 398.86 nm | f=0.0043 | $\langle S^2 \rangle = 0.000$ |
|                  | 56 -> 59  | -0.11230  |           |          |                               |
|                  | 58 -> 59  | 0.69339   |           |          |                               |

This state for optimization and/or second-order correction.

Total Energy, E(TD-HF/TD-DFT) = -1187.56377917

Copying the excited state density for this state as the 1-particle RhoCI density.

|                  |           |           |           |          |              |
|------------------|-----------|-----------|-----------|----------|--------------|
| Excited State 2: | Singlet-A | 4.0827 eV | 303.68 nm | f=0.0016 | <S**2>=0.000 |
| 52 -> 59         | 0.46689   |           |           |          |              |
| 52 -> 64         | -0.20488  |           |           |          |              |
| 53 -> 59         | 0.19693   |           |           |          |              |
| 54 -> 59         | 0.40414   |           |           |          |              |
| 54 -> 64         | -0.16261  |           |           |          |              |
| Excited State 3: | Singlet-A | 4.3941 eV | 282.16 nm | f=0.0003 | <S**2>=0.000 |
| 58 -> 60         | 0.69206   |           |           |          |              |
| Excited State 4: | Singlet-A | 4.4991 eV | 275.58 nm | f=0.0003 | <S**2>=0.000 |
| 50 -> 59         | -0.20303  |           |           |          |              |
| 55 -> 59         | 0.16711   |           |           |          |              |
| 57 -> 59         | 0.64190   |           |           |          |              |
| Excited State 5: | Singlet-A | 4.5336 eV | 273.48 nm | f=0.0003 | <S**2>=0.000 |
| 50 -> 59         | 0.60829   |           |           |          |              |
| 50 -> 64         | -0.24155  |           |           |          |              |
| 57 -> 59         | 0.21998   |           |           |          |              |
| Excited State 6: | Singlet-A | 4.6880 eV | 264.47 nm | f=0.0105 | <S**2>=0.000 |
| 58 -> 61         | 0.60595   |           |           |          |              |
| 58 -> 63         | -0.15637  |           |           |          |              |
| 58 -> 65         | 0.26306   |           |           |          |              |
| Excited State 7: | Singlet-A | 5.0906 eV | 243.55 nm | f=0.0075 | <S**2>=0.000 |
| 55 -> 59         | -0.20055  |           |           |          |              |
| 56 -> 59         | 0.63336   |           |           |          |              |
| 58 -> 59         | 0.12014   |           |           |          |              |
| 58 -> 64         | 0.13052   |           |           |          |              |
| Excited State 8: | Singlet-A | 5.2345 eV | 236.86 nm | f=0.0163 | <S**2>=0.000 |
| 52 -> 60         | 0.17162   |           |           |          |              |
| 53 -> 59         | 0.47226   |           |           |          |              |
| 53 -> 60         | -0.11771  |           |           |          |              |
| 54 -> 59         | -0.27658  |           |           |          |              |
| 54 -> 60         | -0.22006  |           |           |          |              |
| 55 -> 59         | 0.20496   |           |           |          |              |
| 56 -> 59         | 0.15029   |           |           |          |              |
| Excited State 9: | Singlet-A | 5.4323 eV | 228.23 nm | f=0.0066 | <S**2>=0.000 |
| 56 -> 59         | -0.15438  |           |           |          |              |



58 -> 62 -0.39454  
58 -> 64 0.52624  
58 -> 67 -0.10463

Excited State 10: Singlet-A 5.4967 eV 225.56 nm f=0.0233 <S\*\*2>=0.000

55 -> 59 -0.13197  
58 -> 62 0.50918  
58 -> 64 0.37038  
58 -> 67 0.16466

**Conformation b** (Excited State 8 was selected for population analysis on the basis of their oscillator strength value

Excitation energies and oscillator strengths:

Excited State 1: Singlet-A 2.6303 eV 471.36 nm f=0.0003 <S\*\*2>=0.000

56 -> 59 0.11266  
58 -> 59 0.69248

This state for optimization and/or second-order correction.

Total Energy, E(TD-HF/TD-DFT) = -1187.59043662

Copying the excited state density for this state as the 1-particle RhoCI density.

Excited State 2: Singlet-A 3.9568 eV 313.35 nm f=0.0079 <S\*\*2>=0.000

52 -> 59 0.22245  
53 -> 59 -0.11992  
55 -> 59 0.18379  
57 -> 59 0.61522

Excited State 3: Singlet-A 4.1007 eV 302.35 nm f=0.0098 <S\*\*2>=0.000

52 -> 59 0.53961  
52 -> 64 -0.14248  
53 -> 59 -0.29958  
57 -> 59 -0.27927

Excited State 4: Singlet-A 4.5770 eV 270.88 nm f=0.0135 <S\*\*2>=0.000

54 -> 59 0.13142  
55 -> 59 0.14761  
56 -> 59 0.64786  
58 -> 59 -0.11047

Excited State 5: Singlet-A 4.6818 eV 264.82 nm f=0.0137 <S\*\*2>=0.000

50 -> 59 -0.27231  
51 -> 59 -0.11995  
53 -> 61 -0.14825  
54 -> 59 0.58217  
56 -> 59 -0.13787

Excited State 6: Singlet-A 4.8445 eV 255.93 nm f=0.0095 <S\*\*2>=0.000  
49 -> 59 0.13655  
50 -> 59 0.50653  
50 -> 64 -0.11925  
51 -> 59 0.22032  
53 -> 59 -0.14978  
54 -> 59 0.30365  
55 -> 59 -0.11110

Excited State 7: Singlet-A 4.8683 eV 254.68 nm f=0.0056 <S\*\*2>=0.000  
58 -> 60 0.60254  
58 -> 65 0.29493  
58 -> 69 -0.10844

Excited State 8: Singlet-A 5.0567 eV 245.19 nm f=0.0908 <S\*\*2>=0.000  
52 -> 59 -0.23208  
53 -> 59 -0.34996  
55 -> 59 0.48903  
56 -> 59 -0.12687  
57 -> 59 -0.11227  
58 -> 61 0.15774

Excited State 9: Singlet-A 5.1004 eV 243.09 nm f=0.0097 <S\*\*2>=0.000  
53 -> 59 0.13908  
58 -> 61 0.66662

Excited State 10: Singlet-A 5.1662 eV 239.99 nm f=0.0758 <S\*\*2>=0.000  
50 -> 59 0.18929  
52 -> 59 0.19564  
53 -> 59 0.45269  
55 -> 59 0.41367

**Conformation c** (Excited State 10 was selected for population analysis on the basis of their oscillator strength value)

Excitation energies and oscillator strengths:

Excited State 1: Singlet-A 2.6306 eV 471.31 nm f=0.0003 <S\*\*2>=0.000  
56 -> 59 0.11267  
58 -> 59 0.69248

This state for optimization and/or second-order correction.

Total Energy, E(TD-HF/TD-DFT) = -1187.59042541

Copying the excited state density for this state as the 1-particle RhoCI density.

Excited State 2: Singlet-A 3.9569 eV 313.34 nm f=0.0079 <S\*\*2>=0.000  
52 -> 59 0.22294

|                  |           |           |           |          |              |
|------------------|-----------|-----------|-----------|----------|--------------|
| 53 -> 59         | -0.12020  |           |           |          |              |
| 55 -> 59         | 0.18381   |           |           |          |              |
| 57 -> 59         | 0.61496   |           |           |          |              |
| Excited State 3: | Singlet-A | 4.1006 eV | 302.35 nm | f=0.0098 | <S**2>=0.000 |
| 52 -> 59         | 0.53937   |           |           |          |              |
| 52 -> 64         | -0.14242  |           |           |          |              |
| 53 -> 59         | -0.29951  |           |           |          |              |
| 57 -> 59         | -0.27985  |           |           |          |              |
| Excited State 4: | Singlet-A | 4.5772 eV | 270.87 nm | f=0.0135 | <S**2>=0.000 |
| 54 -> 59         | 0.13168   |           |           |          |              |
| 55 -> 59         | 0.14759   |           |           |          |              |
| 56 -> 59         | 0.64779   |           |           |          |              |
| 58 -> 59         | -0.11046  |           |           |          |              |
| Excited State 5: | Singlet-A | 4.6819 eV | 264.82 nm | f=0.0137 | <S**2>=0.000 |
| 50 -> 59         | -0.27248  |           |           |          |              |
| 51 -> 59         | -0.12009  |           |           |          |              |
| 53 -> 61         | -0.14818  |           |           |          |              |
| 54 -> 59         | 0.58199   |           |           |          |              |
| 56 -> 59         | -0.13813  |           |           |          |              |
| Excited State 6: | Singlet-A | 4.8445 eV | 255.93 nm | f=0.0095 | <S**2>=0.000 |
| 49 -> 59         | 0.13639   |           |           |          |              |
| 50 -> 59         | 0.50648   |           |           |          |              |
| 50 -> 64         | -0.11924  |           |           |          |              |
| 51 -> 59         | 0.22038   |           |           |          |              |
| 53 -> 59         | -0.14986  |           |           |          |              |
| 54 -> 59         | 0.30381   |           |           |          |              |
| 55 -> 59         | -0.11079  |           |           |          |              |
| Excited State 7: | Singlet-A | 4.8684 eV | 254.67 nm | f=0.0056 | <S**2>=0.000 |
| 58 -> 60         | 0.60256   |           |           |          |              |
| 58 -> 65         | 0.29490   |           |           |          |              |
| 58 -> 69         | -0.10843  |           |           |          |              |
| Excited State 8: | Singlet-A | 5.0568 eV | 245.18 nm | f=0.0908 | <S**2>=0.000 |
| 52 -> 59         | -0.23216  |           |           |          |              |
| 53 -> 59         | -0.34998  |           |           |          |              |
| 55 -> 59         | 0.48876   |           |           |          |              |
| 56 -> 59         | -0.12673  |           |           |          |              |
| 57 -> 59         | -0.11221  |           |           |          |              |
| 58 -> 61         | 0.15843   |           |           |          |              |
| Excited State 9: | Singlet-A | 5.1004 eV | 243.09 nm | f=0.0097 | <S**2>=0.000 |

53 -> 59 0.13938  
58 -> 61 0.66647

Excited State 10: Singlet-A 5.1664 eV 239.98 nm f=0.0757 <S\*\*2>=0.000

50 -> 59 0.18921  
52 -> 59 0.19554  
53 -> 59 0.45253  
55 -> 59 0.41397

SavETr: write IOETrn= 770 NScale= 10 NData= 16 NLR=1 NState= 10 LETran= 190.

**Trimolecular Conformation** Methylsulfinate-Nitrophenyl-DMA (Excited State 10 was selected for population analysis on the basis of their oscillator strength value)

Excitation energies and oscillator strengths:

Excited State 1: Singlet-A 3.4488 eV 359.50 nm f=0.0013 <S\*\*2>=0.000  
82 -> 83 0.69961

This state for optimization and/or second-order correction.

Total Energy, E(TD-HF/TD-DFT) = -1475.43672610

Copying the excited state density for this state as the 1-particle RhoCI density.

Excited State 2: Singlet-A 4.1123 eV 301.50 nm f=0.0035 <S\*\*2>=0.000

74 -> 83 0.65670  
74 -> 87 -0.10461  
74 -> 88 0.15239  
75 -> 83 -0.14598

Excited State 3: Singlet-A 4.3106 eV 287.62 nm f=0.0148 <S\*\*2>=0.000

78 -> 83 0.57587  
79 -> 83 0.18634  
80 -> 83 -0.32541

Excited State 4: Singlet-A 4.6445 eV 266.95 nm f=0.0047 <S\*\*2>=0.000

72 -> 83 -0.28721  
76 -> 83 0.14707  
78 -> 83 0.31867  
80 -> 83 0.49076  
81 -> 83 -0.16853

Excited State 5: Singlet-A 4.7633 eV 260.29 nm f=0.0134 <S\*\*2>=0.000

72 -> 83 -0.25375  
75 -> 84 0.17177  
76 -> 83 0.55699  
78 -> 83 -0.14055  
80 -> 83 -0.20048

Excited State 6: Singlet-A 4.8108 eV 257.72 nm f=0.0039 <S\*\*2>=0.000  
72 -> 83 0.39816  
76 -> 83 0.23546  
80 -> 83 0.23939  
81 -> 83 0.41680

Excited State 7: Singlet-A 4.8202 eV 257.22 nm f=0.0049 <S\*\*2>=0.000  
72 -> 83 -0.36359  
76 -> 83 -0.24481  
81 -> 83 0.51435

Excited State 8: Singlet-A 5.1059 eV 242.82 nm f=0.2322 <S\*\*2>=0.000  
74 -> 83 0.13477  
75 -> 83 0.65576  
76 -> 84 -0.10974  
80 -> 83 -0.10129

Excited State 9: Singlet-A 5.3744 eV 230.70 nm f=0.0021 <S\*\*2>=0.000  
78 -> 83 -0.13040  
79 -> 83 0.66304  
80 -> 83 0.13546

Excited State 10: Singlet-A 5.4653 eV 226.86 nm f=0.0418 <S\*\*2>=0.000  
82 -> 85 0.46068  
82 -> 87 -0.19820  
82 -> 89 -0.43936  
82 -> 92 0.11025

SavETr: write IOETrn= 770 NScale= 10 NData= 16 NLR=1 NState= 10 LETran= 190.

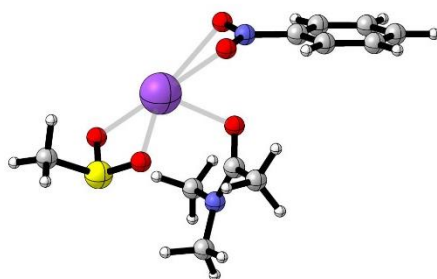

Optimized structure of EDA with an explicit solvent (DMA) molecule as part of the ensemble.

## 6. Characterization data of reported compounds:

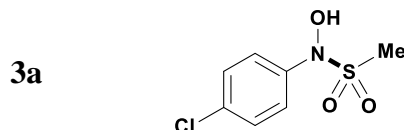

***N*-(4-chlorophenyl)-*N*-hydroxymethanesulfonamide (3a):** Off-white solid. Yield: 71 % (Gradient 20 % to 40 % EtOAc in hexanes). Spectra in agreement with the literature.<sup>5</sup> <sup>1</sup>H NMR (500 MHz, acetone)  $\delta$  10.25 (s, 1H), 7.53 (d,  $J$  = 8.9 Hz, 2H), 7.44 (d,  $J$  = 8.9 Hz, 2H), 2.89 (s, 3H). <sup>13</sup>C NMR (126 MHz, Acetone)  $\delta$  141.88, 131.81, 128.55, 123.85, 30.74.

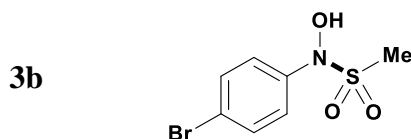

***N*-(4-bromophenyl)-*N*-hydroxymethanesulfonamide (3b):** Yellow solid. Yield: 75 % (Gradient 20 % to 40 % EtOAc in hexanes). <sup>1</sup>H NMR (500 MHz, acetone)  $\delta$  10.26 (s, 1H), 7.61 – 7.58 (d,  $J$  = 8.86 Hz, 2H), 7.50 – 7.47 (d,  $J$  = 8.85 Hz, 2H), 2.91 (s, 3H). <sup>13</sup>C NMR (126 MHz, Acetone)  $\delta$  142.36, 131.58, 124.15, 119.75, 30.81.

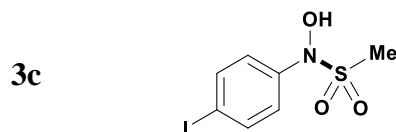

***N*-(4-iodophenyl)-*N*-hydroxymethanesulfonamide (3c):** Yellow solid. Yield: 47 % (Gradient 20 % to 40 % EtOAc in hexanes). <sup>1</sup>H NMR (500 MHz, acetone)  $\delta$  10.26 (s, 1H), 7.81 – 7.76 (d,  $J$  = 8.83 Hz, 2H), 7.37 – 7.33 (d,  $J$  = 8.86 Hz, 2H), 2.90 (s, 3H). <sup>13</sup>C NMR (126 MHz, Acetone)  $\delta$  137.63, 124.27, 90.97, 30.81.

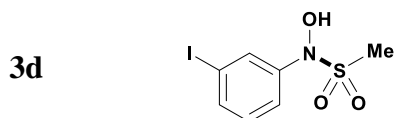

***N*-(3-iodophenyl)-*N*-hydroxymethanesulfonamide (3d):** Yellow solid. Yield: 68 % (Gradient 20 % to 40 % EtOAc in hexanes). <sup>1</sup>H NMR (500 MHz, acetone)  $\delta$  10.29 (s, 1H), 7.91 (t,  $J$  = 1.9 Hz, 1H), 7.68 (m,  $J$  = 7.9, 1.7, 1.0 Hz, 1H), 7.57 (m,  $J$  = 8.2, 2.1, 1.0 Hz, 1H), 7.23 (t,  $J$  = 8.0 Hz, 1H), 2.93 (s, 3H). <sup>13</sup>C NMR (126 MHz, Acetone)  $\delta$  144.27, 135.72, 130.66, 130.39, 121.70, 92.98, 31.07.

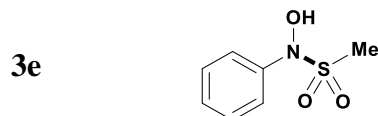

**N-hydroxy-N-phenylmethanesulfonamide (3e):** White solid. Yield: 61% (Gradient 20 % to 40 % EtOAc in hexanes). Spectra in agreement with literature report.<sup>5</sup> <sup>1</sup>H NMR (500 MHz, acetone)  $\delta$  10.12 (s, 1H), 7.54 (d,  $J=8.4$  Hz, 2H), 7.42 (t,  $J=7.49$  Hz, 2H), 7.33 – 7.28 (t,  $J=7.77$  Hz, 1H), 2.87 (s, 3H). <sup>13</sup>C NMR (126 MHz, Acetone)  $\delta$  143.01, 128.51, 126.87, 122.43, 30.60.

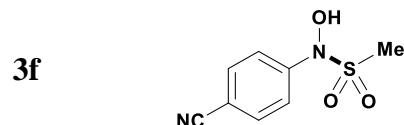

**N-(4-cyanophenyl)-N-hydroxymethanesulfonamide (3f):** Yellow solid. Yield: 64 % (Gradient 20 % to 40 % EtOAc in hexanes). Spectra in agreement with literature report.<sup>5</sup> <sup>1</sup>H NMR (500 MHz, acetone)  $\delta$  10.46 (s, 1H), 7.86 – 7.80 (d,  $J=8.77$  Hz, H), 7.78 – 7.70 (d,  $J=8.85$  Hz, 2H), 2.96 (s, 3H). <sup>13</sup>C NMR (126 MHz, Acetone)  $\delta$  146.84, 122.05, 118.15, 109.78, 31.55, 28.55.

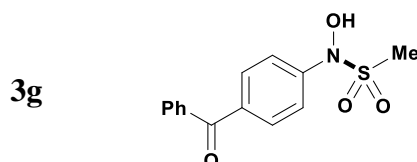

**N-(4-benzoylphenyl)-N-hydroxymethanesulfonamide (3g):** Off-white solid. Yield: 89 %. <sup>1</sup>H NMR (500 MHz, acetone)  $\delta$  10.43 (s, 1H), 7.85(d,  $J=8.40$ , 2H), 7.8 (d,  $J=7.87$  Hz, 2H), 7.71 (d,  $J=8.41$  2H), 7.66 (t,  $J=7.56$  Hz 1H), 7.56 (t,  $J=7.47$  Hz, 2H), 2.96 (s, 3H). <sup>13</sup>C NMR (126 MHz, acetone)  $\delta$  194.80, 146.50, 137.61, 135.47, 132.45, 130.40, 129.68, 128.45, 121.37, 31.34.

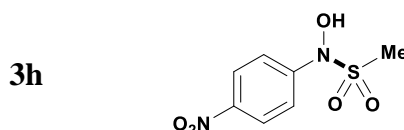

**N-hydroxy-N-(4-nitrophenyl)methanesulfonamide (3h):** Brown solid. Yield: 53 % (Gradient 20 % to 40 % EtOAc in hexanes). <sup>1</sup>H NMR (500 MHz, Acetone)  $\delta$  8.50 (d,  $J=8.8$  Hz, 2H), 8.26 (d,  $J=8.9$  Hz, 2H), 3.27 (s, 3H). <sup>13</sup>C NMR (126 MHz, Acetone)  $\delta$  151.77, 147.50, 129.05, 124.49, 43.06.

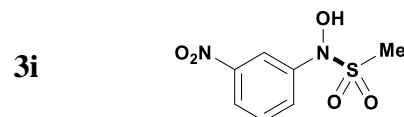

**N-hydroxy-N-(3-nitrophenyl)methanesulfonamide (3i):** Brown solid. Yield: 57 % (Gradient 20 % to 40 % EtOAc in hexanes). <sup>1</sup>H NMR (500 MHz, acetone)  $\delta$  10.56 (s, 1H), 8.39 (t,  $J=2.2$  Hz, 1H), 8.18 (d,  $J=8.2$  Hz, 1H), 7.96 (d,  $J=8.2$  Hz, 1H), 7.74 (t,  $J=8.2$  Hz, 1H). <sup>13</sup>C NMR (126 MHz, Acetone)  $\delta$  148.46, 144.22, 129.88, 128.09, 121.22, 116.16, 31.31.

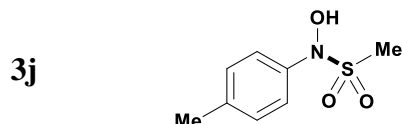

***N*-(4-methylphenyl)-*N*-hydroxymethanesulfonamide (3j):** Off-white solid. Yield: 50 % (Gradient 20 % to 40 % EtOAc in hexanes). <sup>1</sup>H NMR (500 MHz, acetone) δ 10.05 (s, 1H), 7.41 (d, *J*= 8.48 Hz, 2H), 7.22 (d, *J*=8.48 2H), 2.86 (s, 3H), 2.34 (s, 3H). <sup>13</sup>C NMR (126 MHz, Acetone) δ 140.54, 136.71, 129.01, 122.53, 30.42, 20.04.

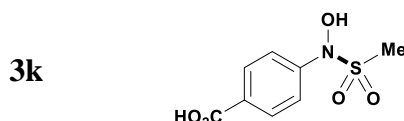

***N*-(4-chlorophenyl)-*N*-hydroxymethanesulfonamide (3k):** Off-white solid Yield: 32 % (Preparative TLC 5% MeOH in DCM). <sup>1</sup>H NMR (500 MHz, acetone) δ 8.75 (d, *J*=8.55 Hz, 2H), 7.66 (d, *J*= 8.57 Hz, 2H), 2.93 (s, 3H). <sup>13</sup>C NMR (126 MHz, Acetone) δ 166.23, 146.95, 130.11, 128.53, 121.42, 31.19.

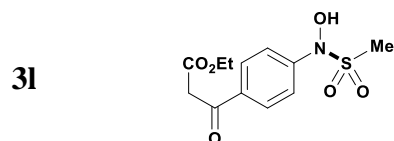

***N*-(4-(2-ethoxycarbonylphenyl)-*N*-hydroxymethanesulfonamide (3l):** Yellow solid. Yield: 30 % (Gradient 20 % to 40 % diethyl ether in hexanes). Compound enolizes when dissolved. <sup>1</sup>H NMR (500 MHz, acetone) δ 10.39 (s, 1H), 8.06 (d, *J*= 8.74 Hz, 2H), 7.69 (m, *J*=8.75 Hz, 2H), 4.17 (q, *J*= 7.1 Hz, 2H), 2.93 (s, 3H), 1.23 (t, *J*= 7.1 Hz, 3H). <sup>13</sup>C NMR (126 MHz, Acetone) δ 129.11, 121.42, 60.67, 45.44, 31.40, 13.54.

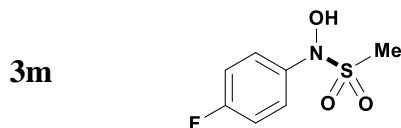

***N*-(4-fluorophenyl)-*N*-hydroxymethanesulfonamide (3m):** Off-white solid Yield: 55 % (Gradient 20 % to 40 % EtOAc in hexanes). <sup>1</sup>H NMR (500 MHz, acetone) δ 10.22 (s, 1H), 7.59 – 7.54 (m, 2H), 7.22 – 7.17 (m, 2H), 2.90 (s, 3H). <sup>13</sup>C NMR (126 MHz, Acetone) δ 162.04 (d, *J*= 244.1 Hz), 139.87 (d, *J*= 3.0 Hz), 125.32 (d, *J*= 8.6 Hz), 115.90 (d, *J*= 23.1 Hz).

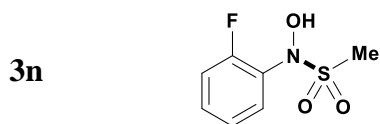

***N*-(2-fluorophenyl)-*N*-hydroxymethanesulfonamide (3n):** Off-white solid. Yield: 40 % (Gradient 20 % to 40 % EtOAc in hexanes). <sup>1</sup>H NMR (500 MHz, acetone) δ 10.31 (s, 1H), 7.71 (td, *J*= 7.8, 1.7 Hz, 1H), 7.42 (m, 1H), 7.29 (t, *J*= 8.1, 1H), 7.24 (t, *J*= 8.2, 1H), 3.06 (s, 3H) <sup>13</sup>C NMR (126 MHz, Acetone) δ 158.37 (d, *J*= 251.8 Hz), 131.49 (d, *J*= 10.8 Hz), 130.67 (d, *J*= 8.1 Hz), 126.74, 125.34 (d, *J*= 4.0 Hz), 117.28 (d, *J*= 20.4 Hz).



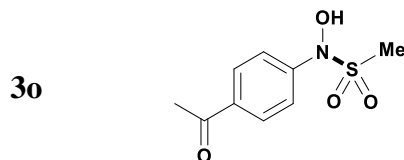

***N*-(4-acetylphenyl)-*N*-hydroxymethanesulfonamide (3o):** Off-white solid. Yield: 85 % (Gradient 20 % to 40 % EtOAc in hexanes). <sup>1</sup>H NMR (500 MHz, acetone) δ 10.34 (s, 1H), 8.03 (d, J=8.75 Hz, 2H), 7.66 (d, J= 8.76 Hz, 2H), 2.93 (s, 3H), 2.60 (s, 3H). <sup>13</sup>C NMR (126 MHz, Acetone) δ 196.28, 146.80, 135.28, 128.80, 121.46, 31.28, 25.85.

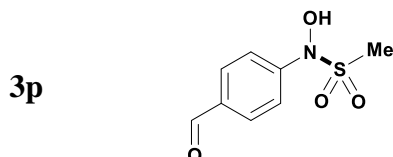

***N*-(4-formylphenyl)-*N*-hydroxymethanesulfonamide (3p):** Yellow solid. Yield: 61 % (Gradient 20 % to 40 % EtOAc in hexanes). <sup>1</sup>H NMR (500 MHz, acetone) δ 10.41 (s, 1H), 10.05 (s, 1H), 7.98 (d, J=8.54 Hz, 2H), 7.76 (d, J=8.54 Hz, 2H), 2.95 (s, 3H). <sup>13</sup>C NMR (126 MHz, Acetone) δ 191.14, 134.74, 129.93, 121.81, 31.45.

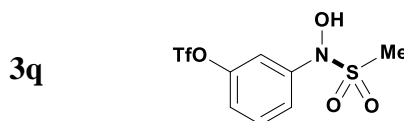

**3-(*N*-hydroxymethylsulfonamido)phenyl trifluoromethanesulfonate (3q):** Off-white solid. Yield: 67 % (Gradient 20 % to 40 % EtOAc in hexanes). <sup>1</sup>H NMR (500 MHz, acetone) δ 10.87 (s, 1H), 7.69 – 7.61 (m, 3H), 7.40 (m, 1H), 2.95 (s, 3H). <sup>13</sup>C NMR (126 MHz, Acetone) δ 150.42, 146.03, 123.62, 120.48, 119.81 (q, J = 320.0 Hz), 115.80, 32.18.

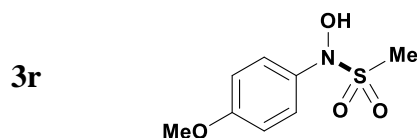

***N*-hydroxy-*N*-(4-methoxyphenyl)methanesulfonamide (3r):** Off-white solid. Yield: 43 % (Gradient 20 % to 40 % EtOAc in hexanes). <sup>1</sup>H NMR (500 MHz, acetone) δ 10.03 (s, 1H), 7.47 – 7.44 (d, J=8.79 Hz, 2H), 6.96 (d, J=8.79 Hz, 2H), 3.82 (s, 3H), 2.87 (s, 3H). <sup>13</sup>C NMR (126 MHz, cdcl3) δ 159.72, 136.56, 125.31, 125.26, 125.19, 114.52, 55.77, 31.27.

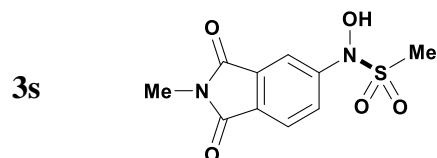

***N*-hydroxy-*N*-(2-methyl-1,3-dioxisoindolin-5-yl)methanesulfonamide (3s):** Yellow solid. Yield: 34 % (Gradient 20 % to 40 % EtOAc in hexanes). <sup>1</sup>H NMR (500 MHz, acetone) δ 10.55 (s, 1H), 7.96 – 7.91 (m, 2H), 7.90 – 7.86 (d, J=8.45 Hz, 1H), 3.11 (s, 3H), 3.00 (s, 3H). <sup>13</sup>C NMR (126 MHz, Acetone) δ 167.31, 167.29, 148.15, 133.33, 129.90, 126.56, 123.31, 115.66, 31.60, 23.20.

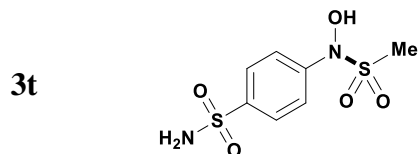

**4-(*N*-hydroxymethylsulfonamido)benzenesulfonamide (3t):** Off-white solid. Yield: 77 % (100 % EtOAc).  $^1\text{H}$  NMR (500 MHz,  $\text{CD}_3\text{CN}$ )  $\delta$  9.13 (s, 1H), 7.91 (d,  $J=8.90$  Hz, 2H), 7.67 (d,  $J=8.89$ , 2H), 5.80 (s, 2H), 2.90 (s, 3H).  $^{13}\text{C}$  NMR (126 MHz,  $\text{CD}_3\text{CN}$ )  $\delta$  127.44, 122.47, 121.92, 117.39, 31.90.

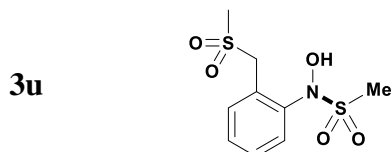

***N*-hydroxy-*N*-(2-((methylsulfonyl)methyl)phenyl)methanesulfonamide (3u):** Off-white solid. Yield: 46 % (Gradient 0% to 20 % acetone in hexanes).  $^1\text{H}$  NMR (500 MHz, acetone)  $\delta$  10.20 (s, 1H), 7.81 (d,  $J = 8.2$ , 1H), 7.66 (d,  $J = 7.8$ , 1H), 7.58 – 7.49 (t,  $J=7.6$  Hz, 1H), 7.45 (t,  $J = 7.6$ , 1H), 4.63 (s, 2H), 3.13 (s, 3H), 2.84 (d, 3H).  $^{13}\text{C}$  NMR (126 MHz, Acetone)  $\delta$  141.81, 131.94, 129.58, 128.61, 127.96, 124.75, 55.72, 39.39, 32.18.

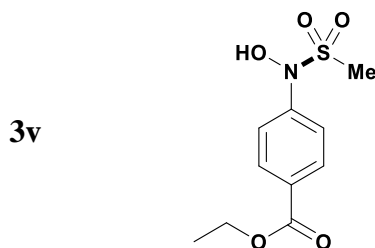

**Ethyl 4-(*N*-hydroxymethylsulfonamido)benzoate (3v):** Off-white solid. Yield: 88 % (Gradient 20 % to 40 % EtOAc in hexanes).  $^1\text{H}$  NMR (500 MHz, acetone/ $\text{CHCl}_3$ )  $\delta$  10.34 (s, 1H), 8.05 (d,  $J=8.56$  Hz, 2H), 7.66 (d,  $J=8.50$  Hz, 2H), 4.36 (q,  $J = 7.1$  Hz, 2H), 1.38 (t,  $J = 7.1$  Hz, 3H).  $^{13}\text{C}$  NMR (126 MHz, Acetone)  $\delta$  165.27, 146.93, 129.79, 128.51, 121.41, 60.69, 31.19, 13.74.

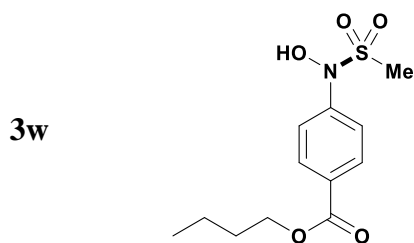

**Butyl 4-(*N*-hydroxymethylsulfonamido)benzoate (3w):** Off-white solid. Yield: 91 % (Gradient 20 % to 40 % EtOAc in hexanes).  $^1\text{H}$  NMR (500 MHz, acetone/ $\text{CHCl}_3$ )  $\delta$  8.09 – 8.04 (m, 2H), 7.69 – 7.63 (m, 2H), 4.32 (t,  $J = 6.6$  Hz, 2H), 2.92 (s, 3H), 1.76 (dq,  $J = 7.9$ , 6.6 Hz, 2H), 1.49 (h,  $J = 7.4$  Hz, 2H), 0.98 (t,  $J = 7.4$  Hz, 3H).  $^{13}\text{C}$  NMR (126 MHz, Acetone)  $\delta$  165.33, 146.96, 129.80, 128.48, 121.44, 64.48, 31.22, 30.65, 19.04, 13.18.

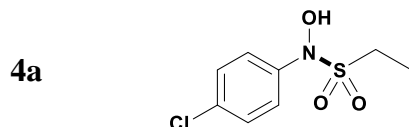

***N*-(4-chlorophenyl)-*N*-hydroxyethanesulfonamide (4a):** Off-white solid. Yield: 51 % (Gradient 20 % to 40 % EtOAc in hexanes). Spectra in agreement with literature report.<sup>5</sup> <sup>1</sup>H NMR (500 MHz, acetone)  $\delta$  10.16 (s, 1H), 7.59 – 7.52 (d,  $J=8.73$  Hz, 2H), 7.47 – 7.40 (d,  $J=8.76$  Hz, 2H), 3.19 (q,  $J = 7.5$  Hz, 2H), 1.28 (t,  $J = 7.5$  Hz, 3H). <sup>13</sup>C NMR (126 MHz, Acetone)  $\delta$  141.75, 131.55, 128.51, 123.68, 39.98, 6.72.

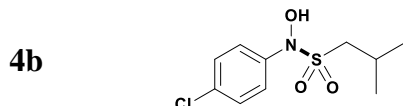

***N*-(4-chlorophenyl)-*N*-hydroxy-2-methylpropane-1-sulfonamide (4b):** Off-white solid. Yield: 44 % (Gradient 20 % to 40 % EtOAc in hexanes). <sup>1</sup>H NMR (500 MHz, acetone)  $\delta$  10.17 (s, 1H), 7.54 (d,  $J=8.71$ , 2H), 7.44 (d,  $J= 8.70$  Hz, 2H), 3.00 (d,  $J = 6.7$  Hz, 2H), 2.22 (sept,  $J = 13.4, 6.7$  Hz, 1H), 1.06 (d,  $J = 6.8$  Hz, 6H). <sup>13</sup>C NMR (126 MHz, Acetone)  $\delta$  141.77, 131.57, 128.52, 123.65, 51.71, 24.15, 21.76.

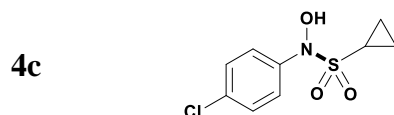

***N*-(4-chlorophenyl)-*N*-hydroxycyclopropanesulfonamide (4c):** Off-white solid. Yield: 82 % (Gradient 20 % to 40 % EtOAc in hexanes). <sup>1</sup>H NMR (500 MHz, acetone)  $\delta$  10.08 (s, 1H), 7.61 – 7.54 (d,  $J=8.83$  Hz, 2H), 7.46 – 7.40 (d,  $J=8.83$  Hz, 2H), 2.66 (m, 1H), 1.06 – 0.96 (m, 2H), 0.99 – 0.85 (m, 2H). <sup>13</sup>C NMR (126 MHz, Acetone)  $\delta$  142.17, 131.66, 128.35, 124.19, 23.39, 3.96.

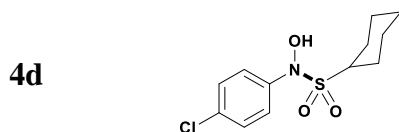

***N*-(4-chlorophenyl)-*N*-hydroxycyclohexanesulfonamide (4d):** Off-white solid Yield: 76 % (Gradient 20 % to 40 % EtOAc in hexanes). <sup>1</sup>H NMR (500 MHz, Acetone)  $\delta$  9.99 (s, 1H), 7.56 (d,  $J=8.78$  Hz, 2H), 7.42(m,  $J=8.78$  Hz, 2H), 3.49 (tt,  $J = 11.9, 3.6$  Hz, 1H), 2.07 – 2.01 (m, 1H), 1.86 – 1.76 (m, 2H), 1.64 (dddt,  $J = 12.9, 4.9, 3.2, 1.5$  Hz, 1H), 1.52 (qd,  $J = 12.4, 3.3$  Hz, 2H), 1.32 (qt,  $J = 12.8, 3.4$  Hz, 2H), 1.21 (qt,  $J = 12.8, 3.4$  Hz, 1H). <sup>13</sup>C NMR (126 MHz, Acetone)  $\delta$  141.91, 131.07, 128.47, 123.25, 57.47, 26.67, 24.93, 24.78.

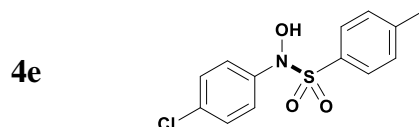

***N*-(4-chlorophenyl)-*N*-hydroxy-4-methylbenzenesulfonamide (4e):** Off-white solid. Yield: 74 % (Gradient 20 % to 40 % EtOAc in hexanes). Spectra in agreement with literature.<sup>6</sup> <sup>1</sup>H NMR (500 MHz, acetone)  $\delta$  10.23 (s, 1H), 7.43 (d,  $J=8.38$  Hz, 2H), 7.38 – 7.29 (m, 4H), 7.19 (d,

J=8.83 Hz, 2H), 2.42 (s, 3H).  $^{13}\text{C}$  NMR (126 MHz, Acetone)  $\delta$  145.04, 141.93, 131.84, 129.95, 129.57, 129.14, 128.19, 124.15, 20.70.

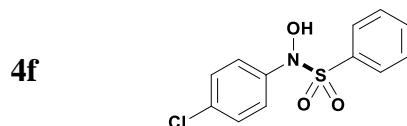

***N*-(4-chlorophenyl)-*N*-hydroxybenzenesulfonamide (4f):** Off-white solid. Yield: 49 % (Gradient 20 % to 40 % EtOAc in hexanes). Spectra in agreement with literature.<sup>6</sup>  $^1\text{H}$  NMR (500 MHz, acetone)  $\delta$  10.30 (s, 1H), 7.73 (m, Hz, 1H), 7.60 – 7.52 (m, 4H), 7.36 – 7.30 (d, J=8.80 Hz, 2H), 7.22 – 7.16 (d, J=8.80 Hz, 2H).  $^{13}\text{C}$  NMR (126 MHz, Acetone)  $\delta$  141.76, 134.04, 132.78, 131.99, 129.52, 128.62, 128.25, 124.19.

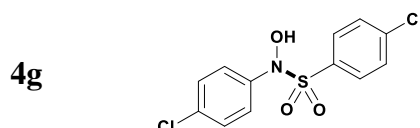

**4-chloro-*N*-(4-chlorophenyl)-*N*-hydroxybenzenesulfonamide (4g):** Off-white solid. Yield: 54 % (Gradient 20 % to 40 % EtOAc in hexanes). Spectra in agreement with literature.<sup>5</sup>  $^1\text{H}$  NMR (500 MHz, acetone)  $\delta$  10.26 (s, 1H), 7.54 – 7.47 (m, 4H), 7.29 – 7.24 (d, 2H), 7.16 – 7.12 (d, 2H).  $^{13}\text{C}$  NMR (126 MHz, Acetone)  $\delta$  141.73, 140.60, 132.78, 131.64, 131.56, 129.20, 129.18, 128.73, 124.53.

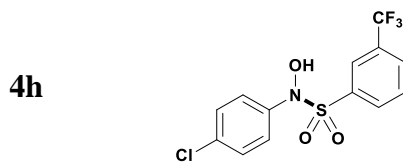

***N*-(4-chlorophenyl)-*N*-hydroxy-3-(trifluoromethyl)benzenesulfonamide (4h):** Off-white solid. Yield: 38 % (Gradient 20 % to 40 % EtOAc in hexanes).  $^1\text{H}$  NMR (500 MHz, Acetone)  $\delta$  10.57 (s, 3H), 8.12 (d, J=7.56 Hz 1H), 7.85 (m, 2H), 7.75 (bs, 1H), 7.37 (d, J= 8.86 Hz, 2H), 7.22 – 7.16 (d, J=8.83 Hz, 2H).  $^{13}\text{C}$  NMR (126 MHz, Acetone)  $\delta$  141.29, 133.70, 133.21, 132.49, 130.70, 130.67, 130.18, 128.45, 126.07, 126.04, 124.22.

## 7. References

1. H.-S. Zhou, L.-B. Hu, H. Zhang, W.-X. Shan, Y. Wang, X. Li, T. Liu, J. Zhao, Q.-D. You and Z.-Y. Jiang, *J. Med. Chem.*, 2020, **63**, 11149-11168.
2. H. J. Najer, Michel, *Chemisches Zentralblatt*, 1959, **130**, 3797-3797.
3. L.-C. Wang, B. Chen and X.-F. Wu, *Angew. Chem. Int. Ed.*, 2022, **61**, e202203797.
4. M. J. Frisch, G. W. Trucks, H. B. Schlegel, G. E. Scuseria, M. A. Robb, J. R. Cheeseman, G. Scalmani, V. Barone, G. A. Petersson, H. Nakatsuji, X. Li, M. Caricato, A. V. Marenich, J. Bloino, B. G. Janesko, R. Gomperts, B. Mennucci, H. P. Hratchian, J. V. Ortiz, A. F. Izmaylov, J. L. Sonnenberg, Williams, F. Ding, F. Lipparini, F. Egidi, J. Goings, B. Peng, A. Petrone, T. Henderson, D. Ranasinghe, V. G. Zakrzewski, J. Gao, N. Rega, G. Zheng, W. Liang, M. Hada, M. Ehara, K. Toyota, R. Fukuda, J. Hasegawa, M. Ishida, T. Nakajima, Y. Honda, O. Kitao, H. Nakai, T. Vreven, K. Throssell, J. A. Montgomery Jr., J. E. Peralta, F. Ogliaro, M. J. Bearpark, J. J. Heyd, E. N. Brothers, K. N. Kudin, V. N. Staroverov, T. A. Keith, R. Kobayashi, J. Normand, K. Raghavachari, A. P. Rendell, J. C. Burant, S. S. Iyengar, J. Tomasi, M. Cossi, J. M. Millam, M. Klene, C. Adamo, R. Cammi, J. W. Ochterski, R. L. Martin, K. Morokuma, O. Farkas, J. B. Foresman and D. J. Fox, *Journal*, 2016.
5. E. Y. Belyaev, L. M. Gornostaev and G. A. Suboch, *Khim. Tekhnol. Polim.*, 1975, **4**, 60.
6. H. Goljani, Z. Tavakkoli, A. Sadatnabi, M. Masoudi-khorm and D. Nematollahi, *Scientific Reports*, 2020, **10**, 17904.

## 8. Spectra collection

$^1\text{H}$ NMR of 3a, acetone, 500 MHz

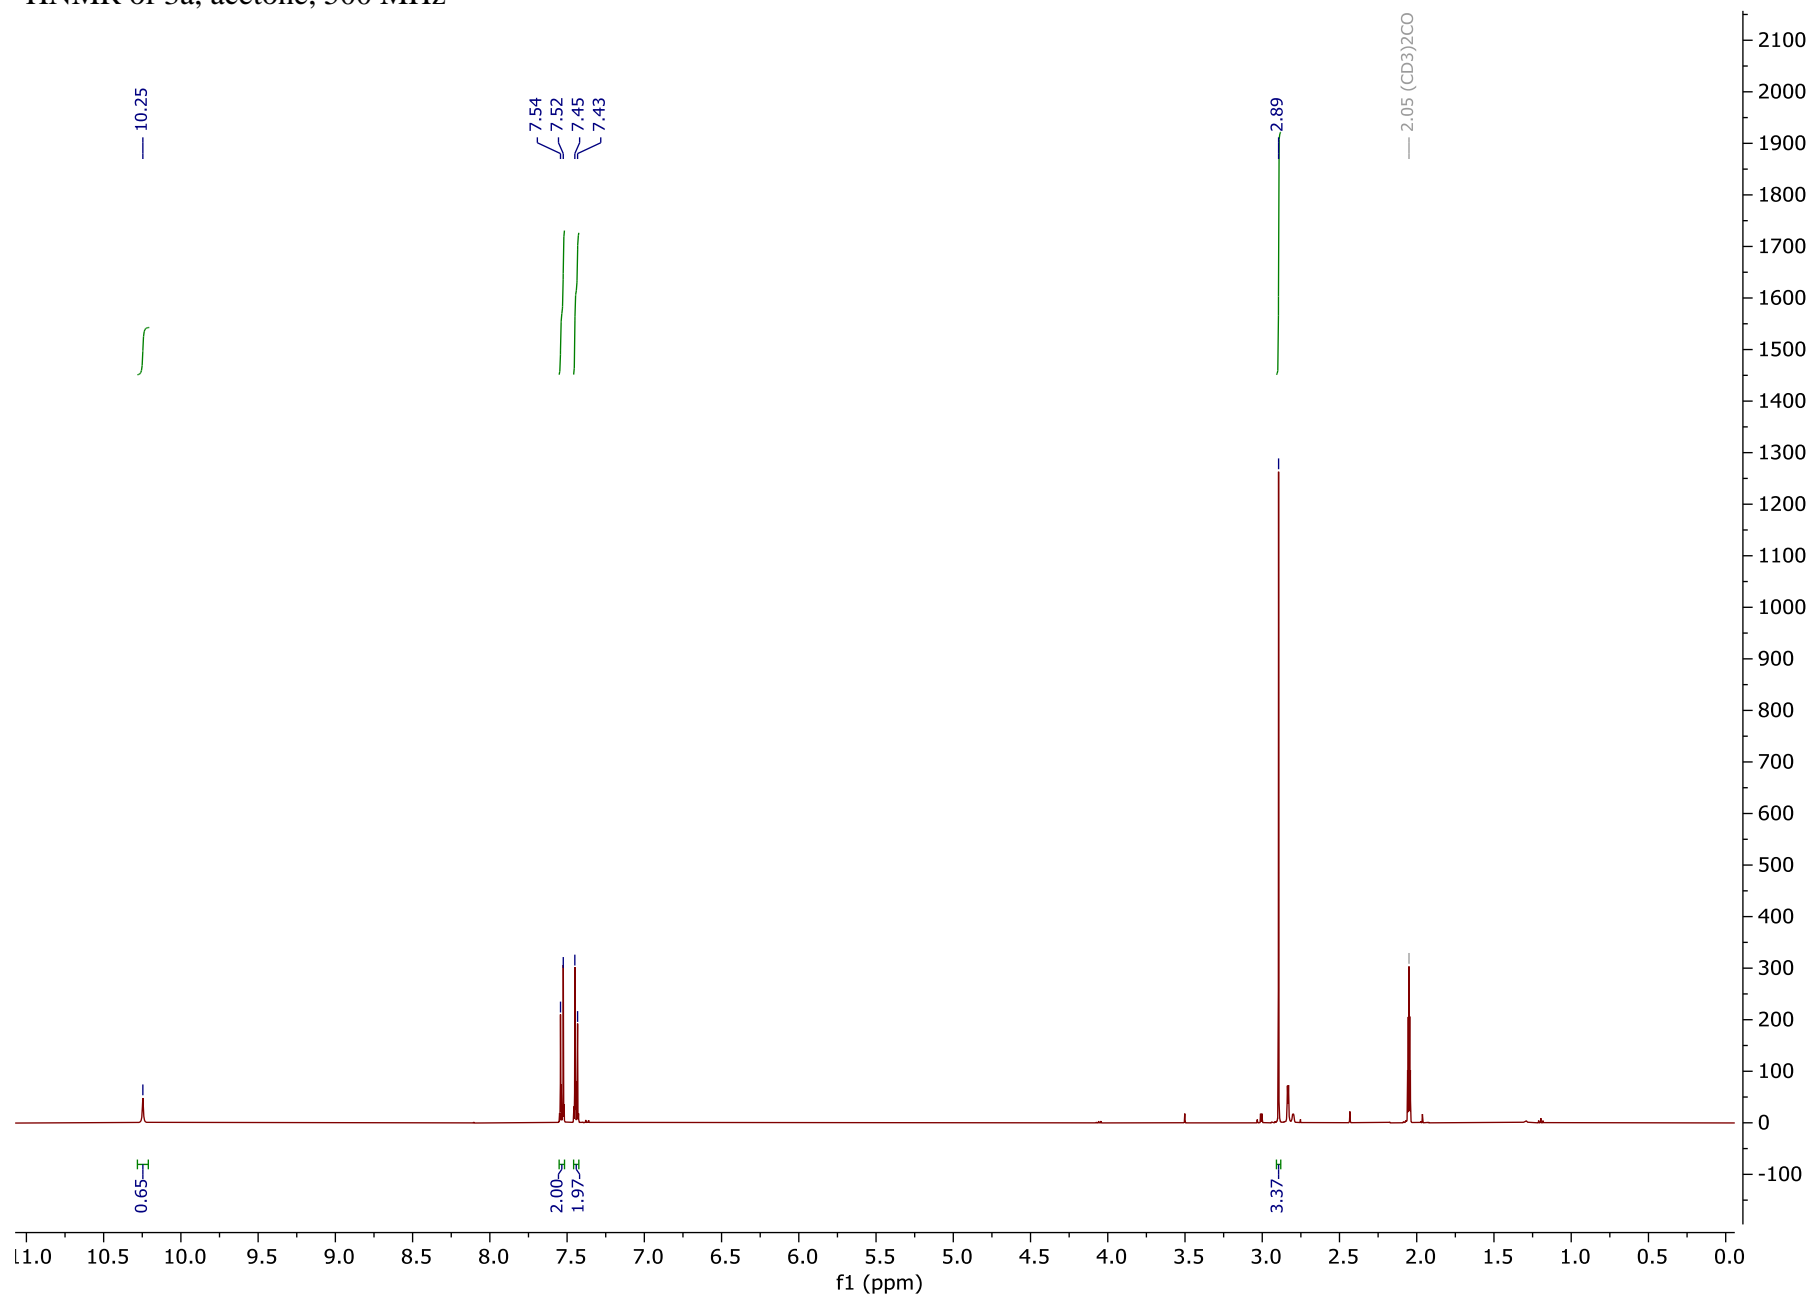

$^{13}\text{C}$  NMR of 3a, acetone, 126 MHz

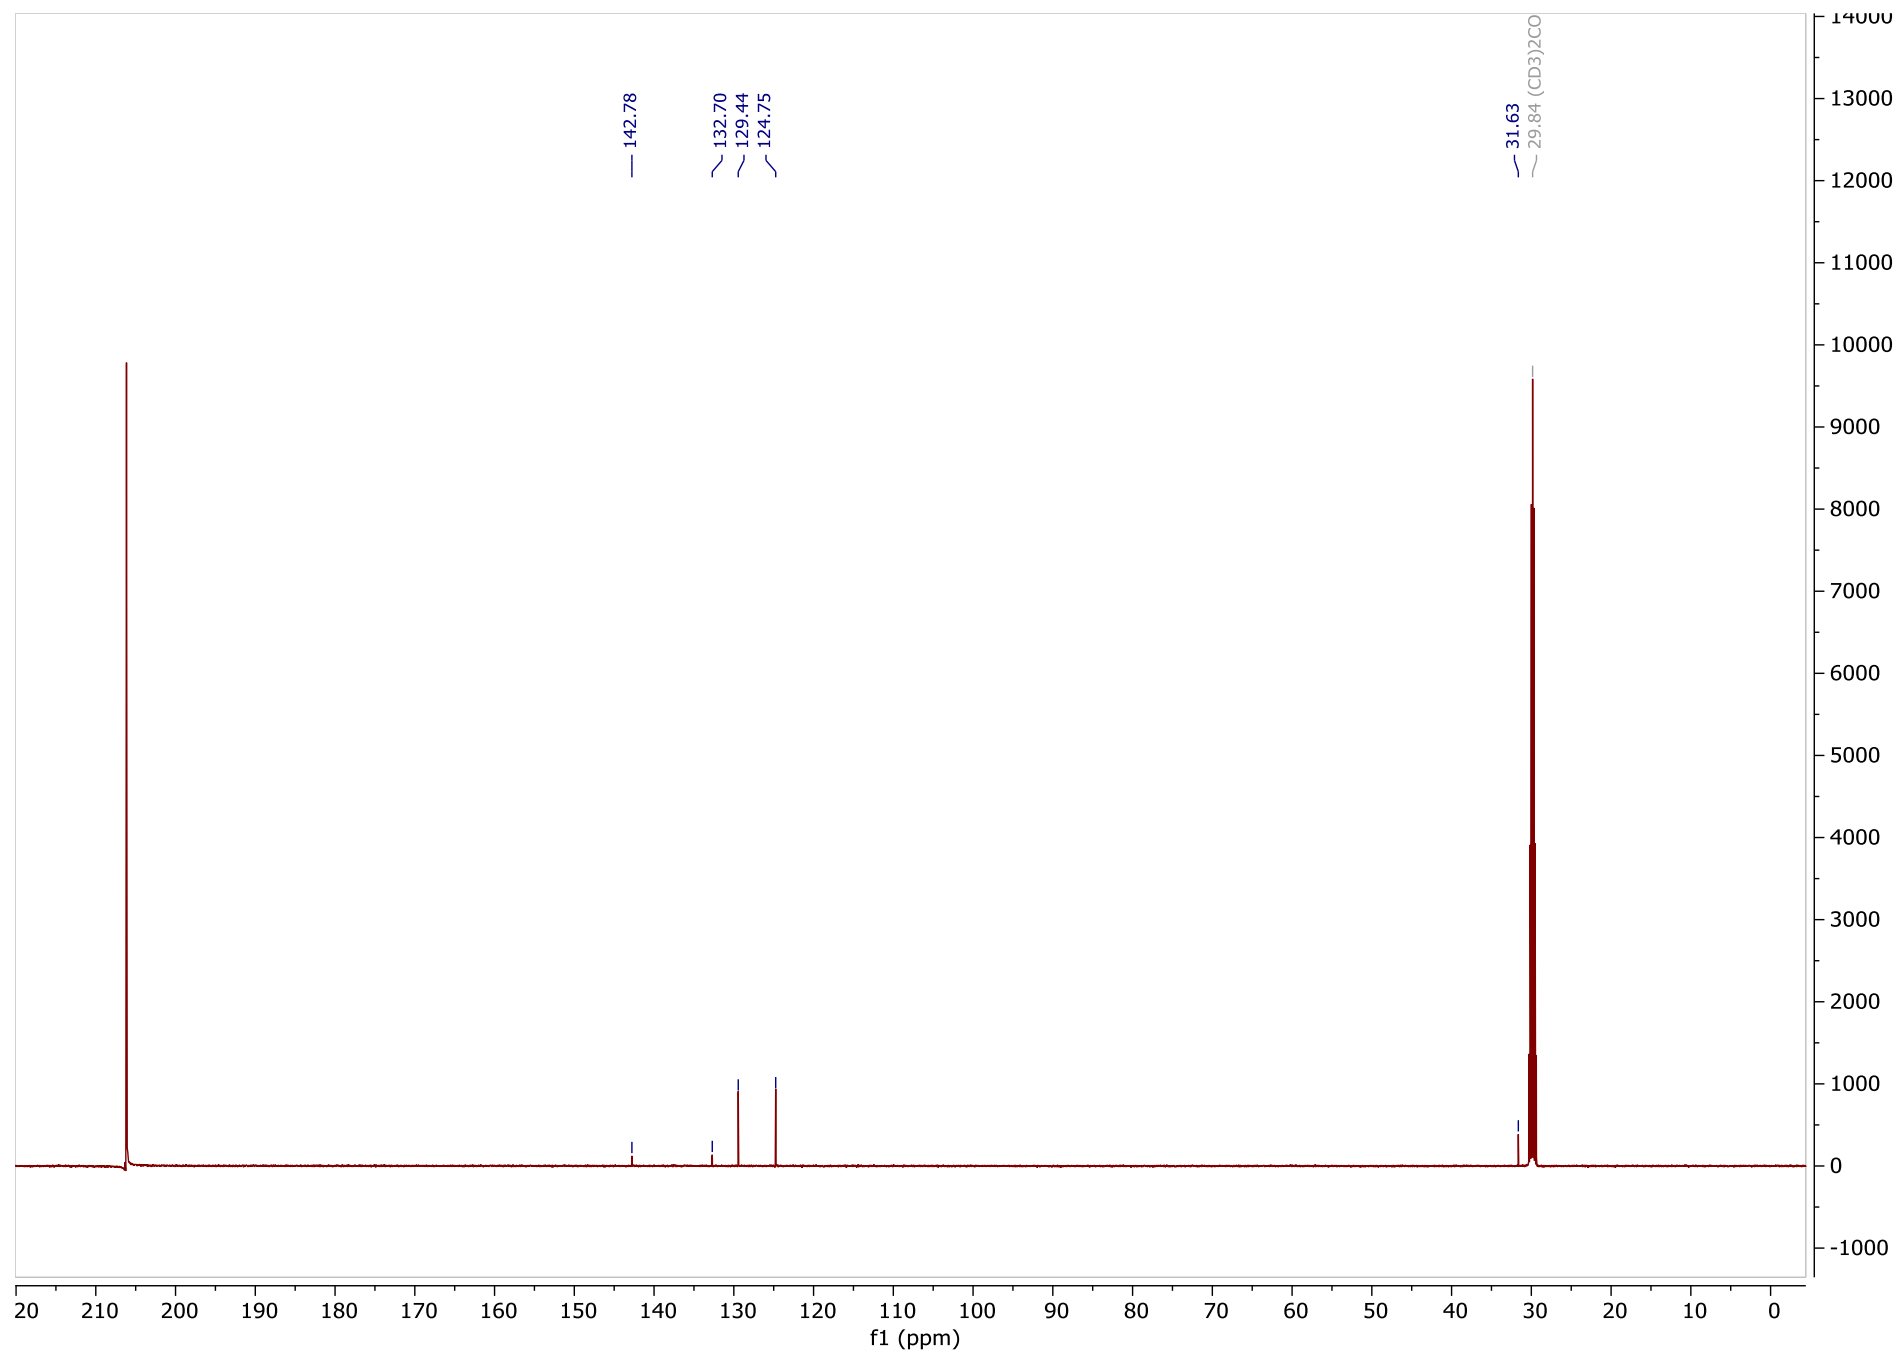

<sup>1</sup>H NMR of 3b, acetone, 500 MHz

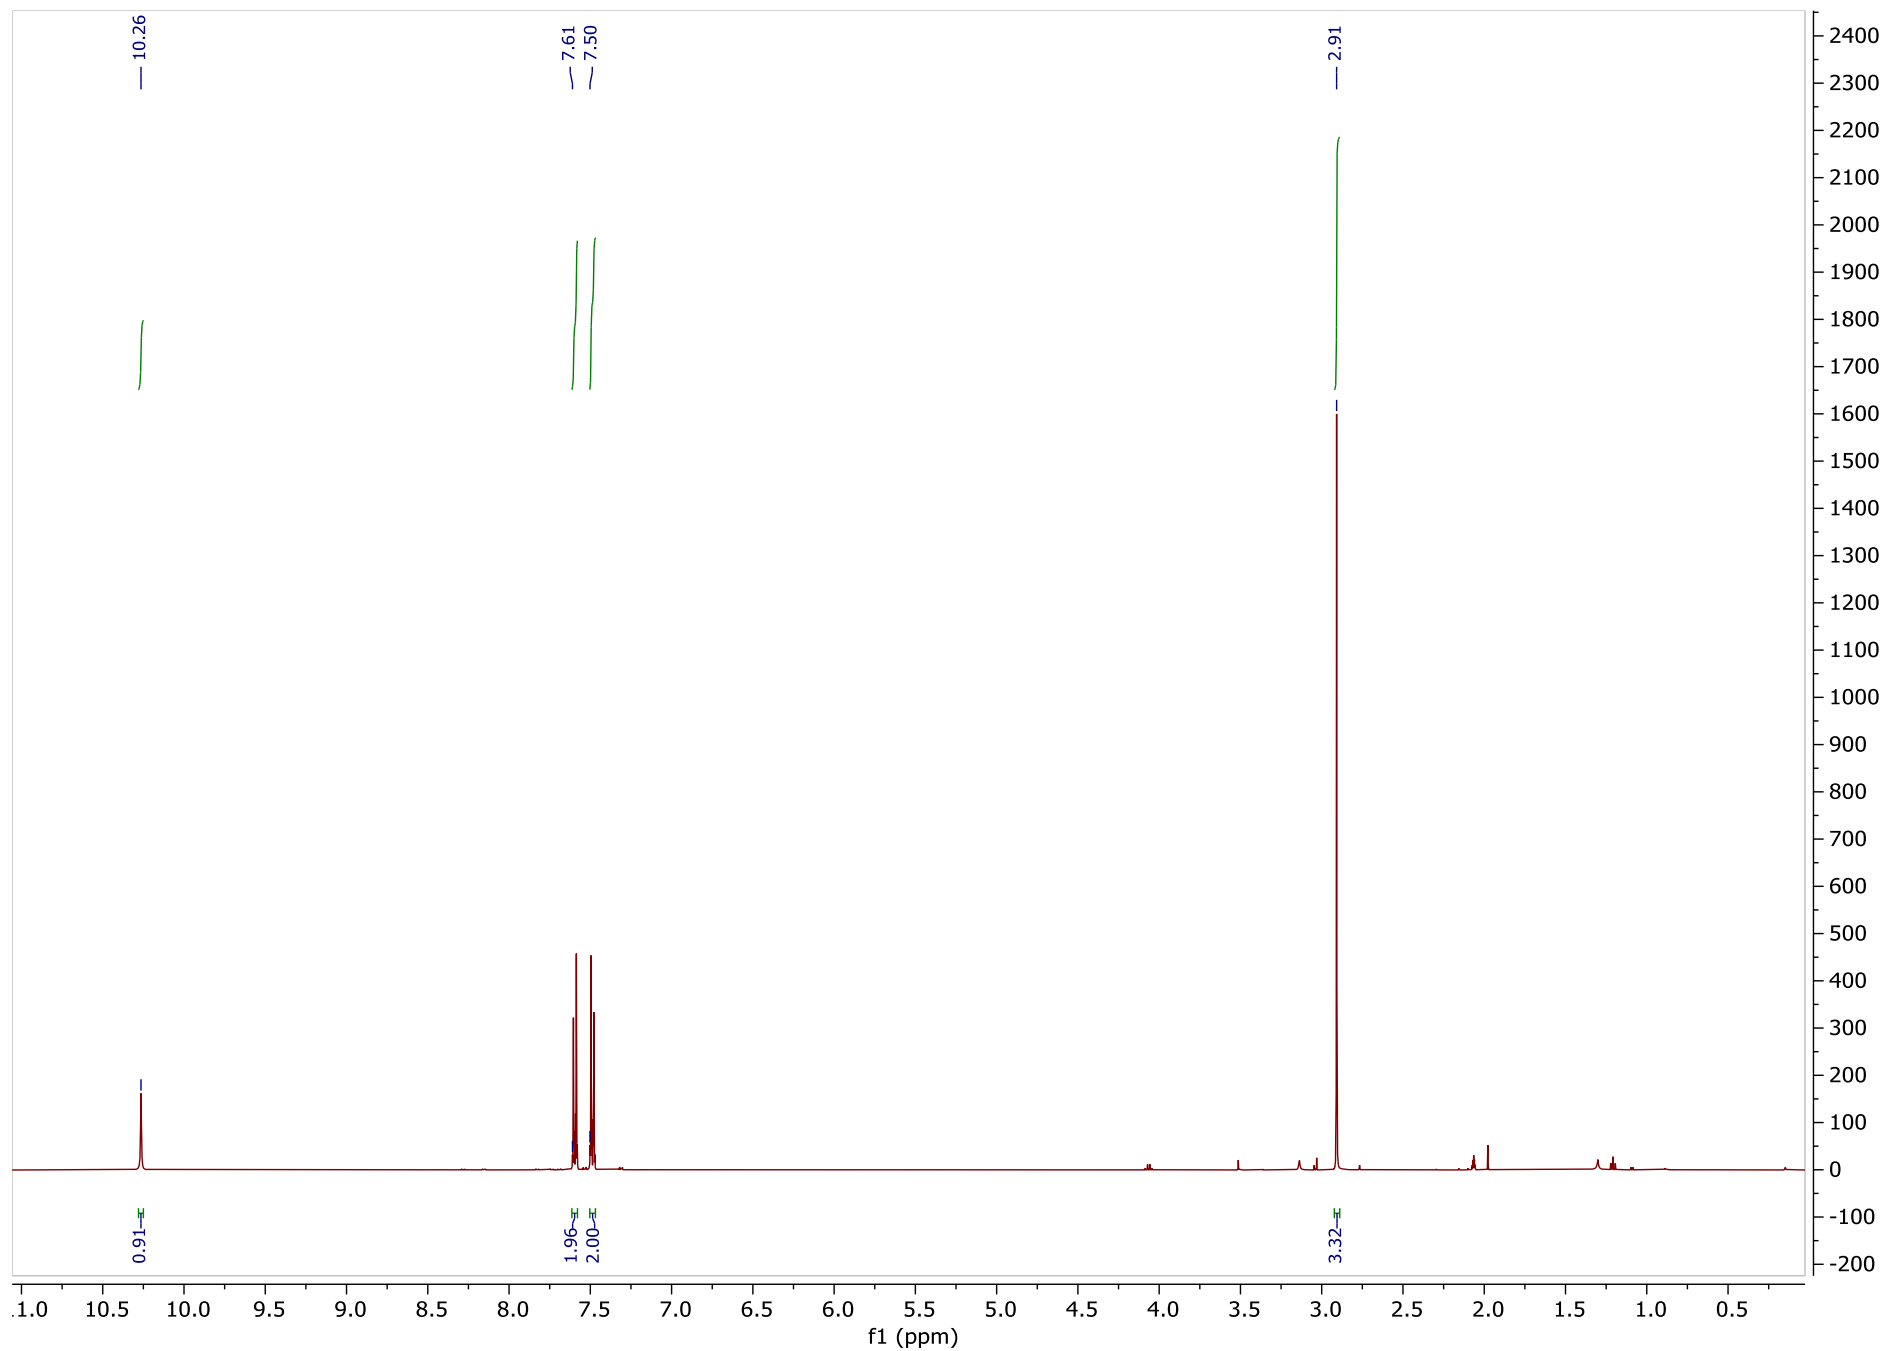



$^{13}\text{C}$  NMR of 3b, acetone, 126 MHz

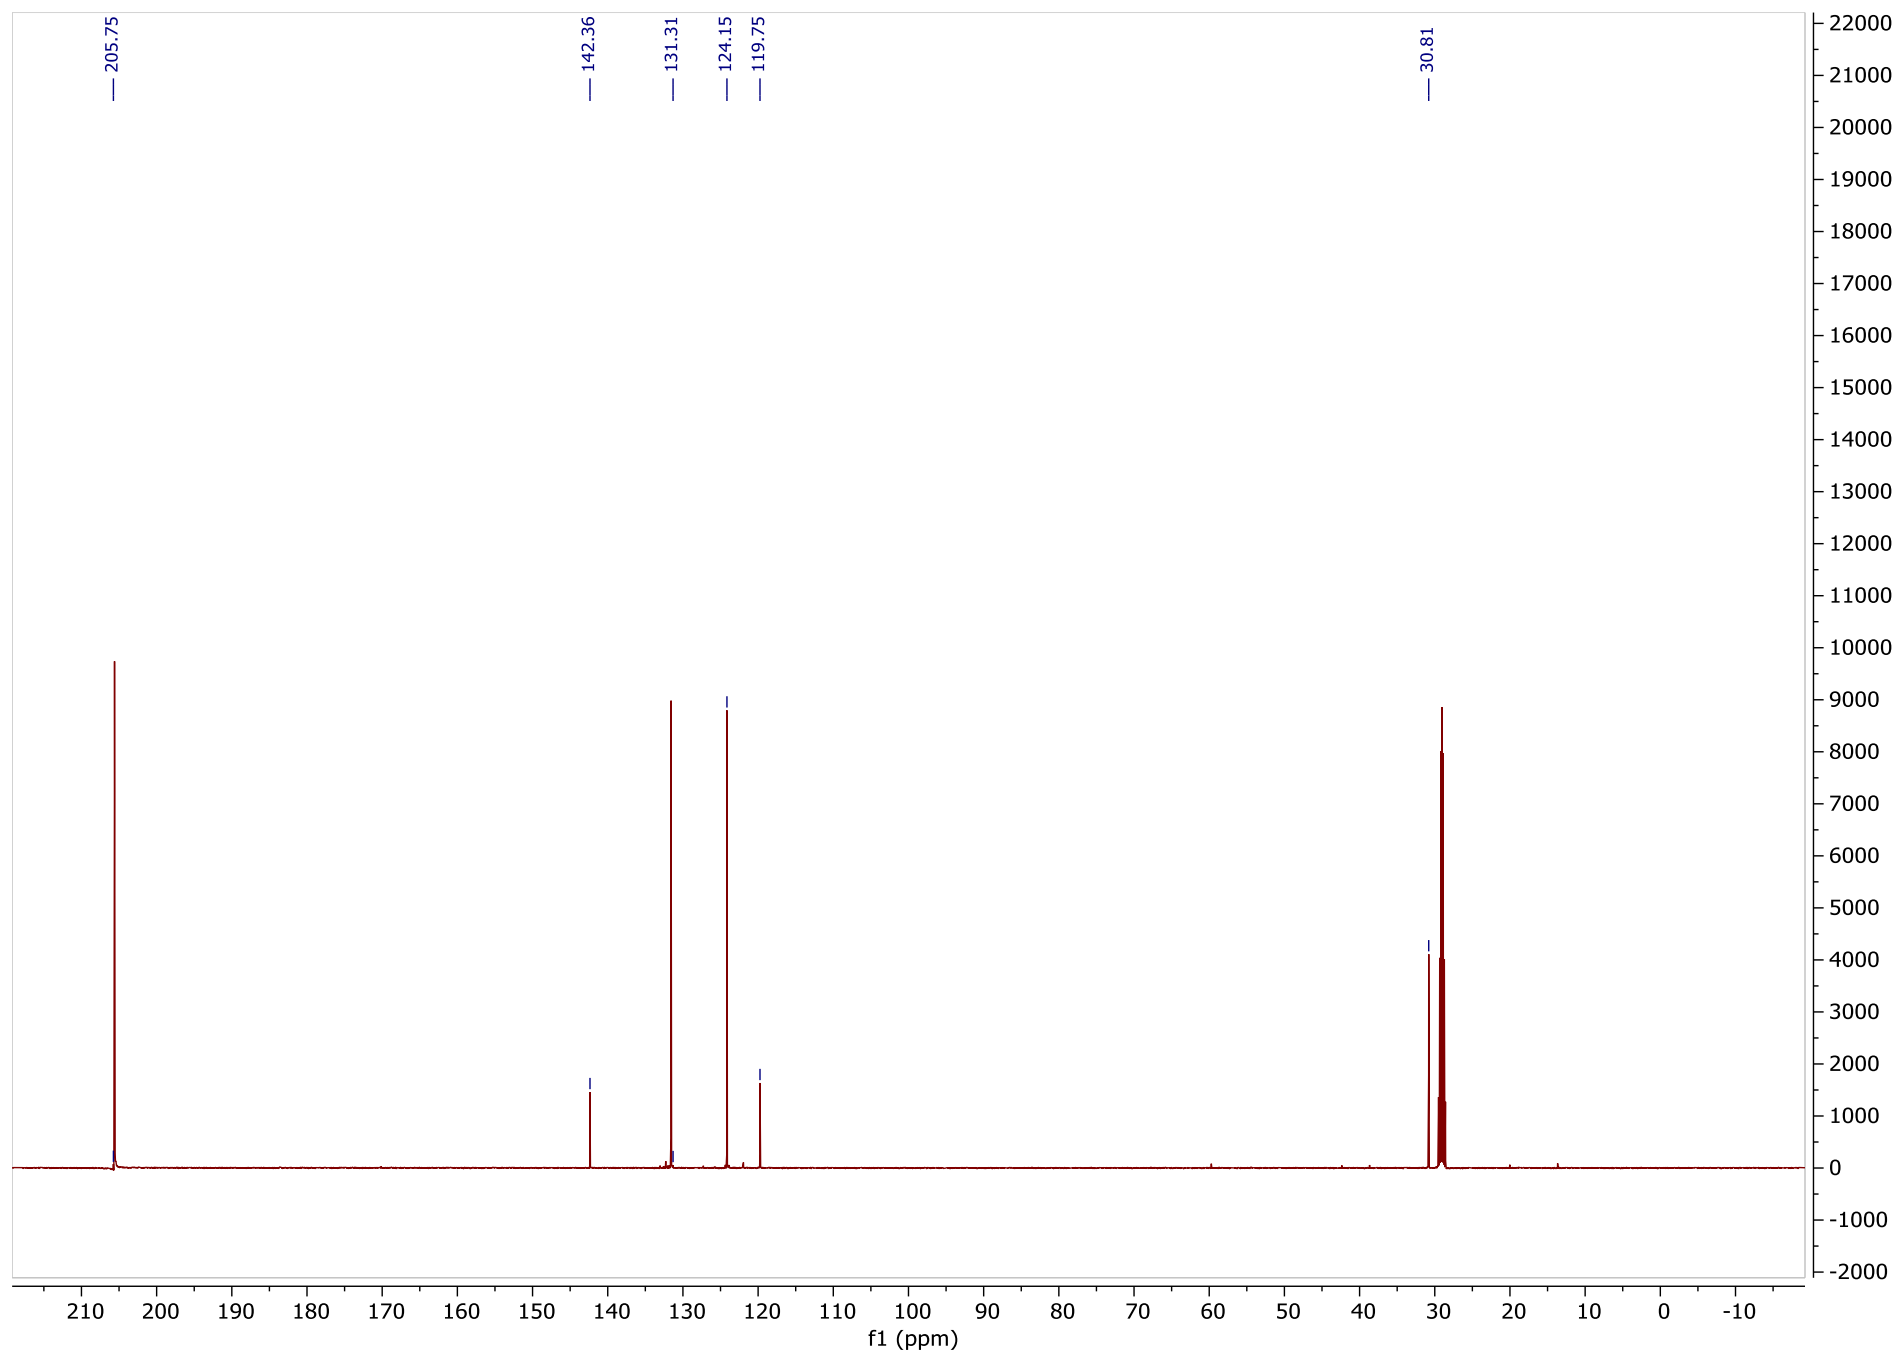

<sup>1</sup>H NMR of 3c, acetone, 500 MHz

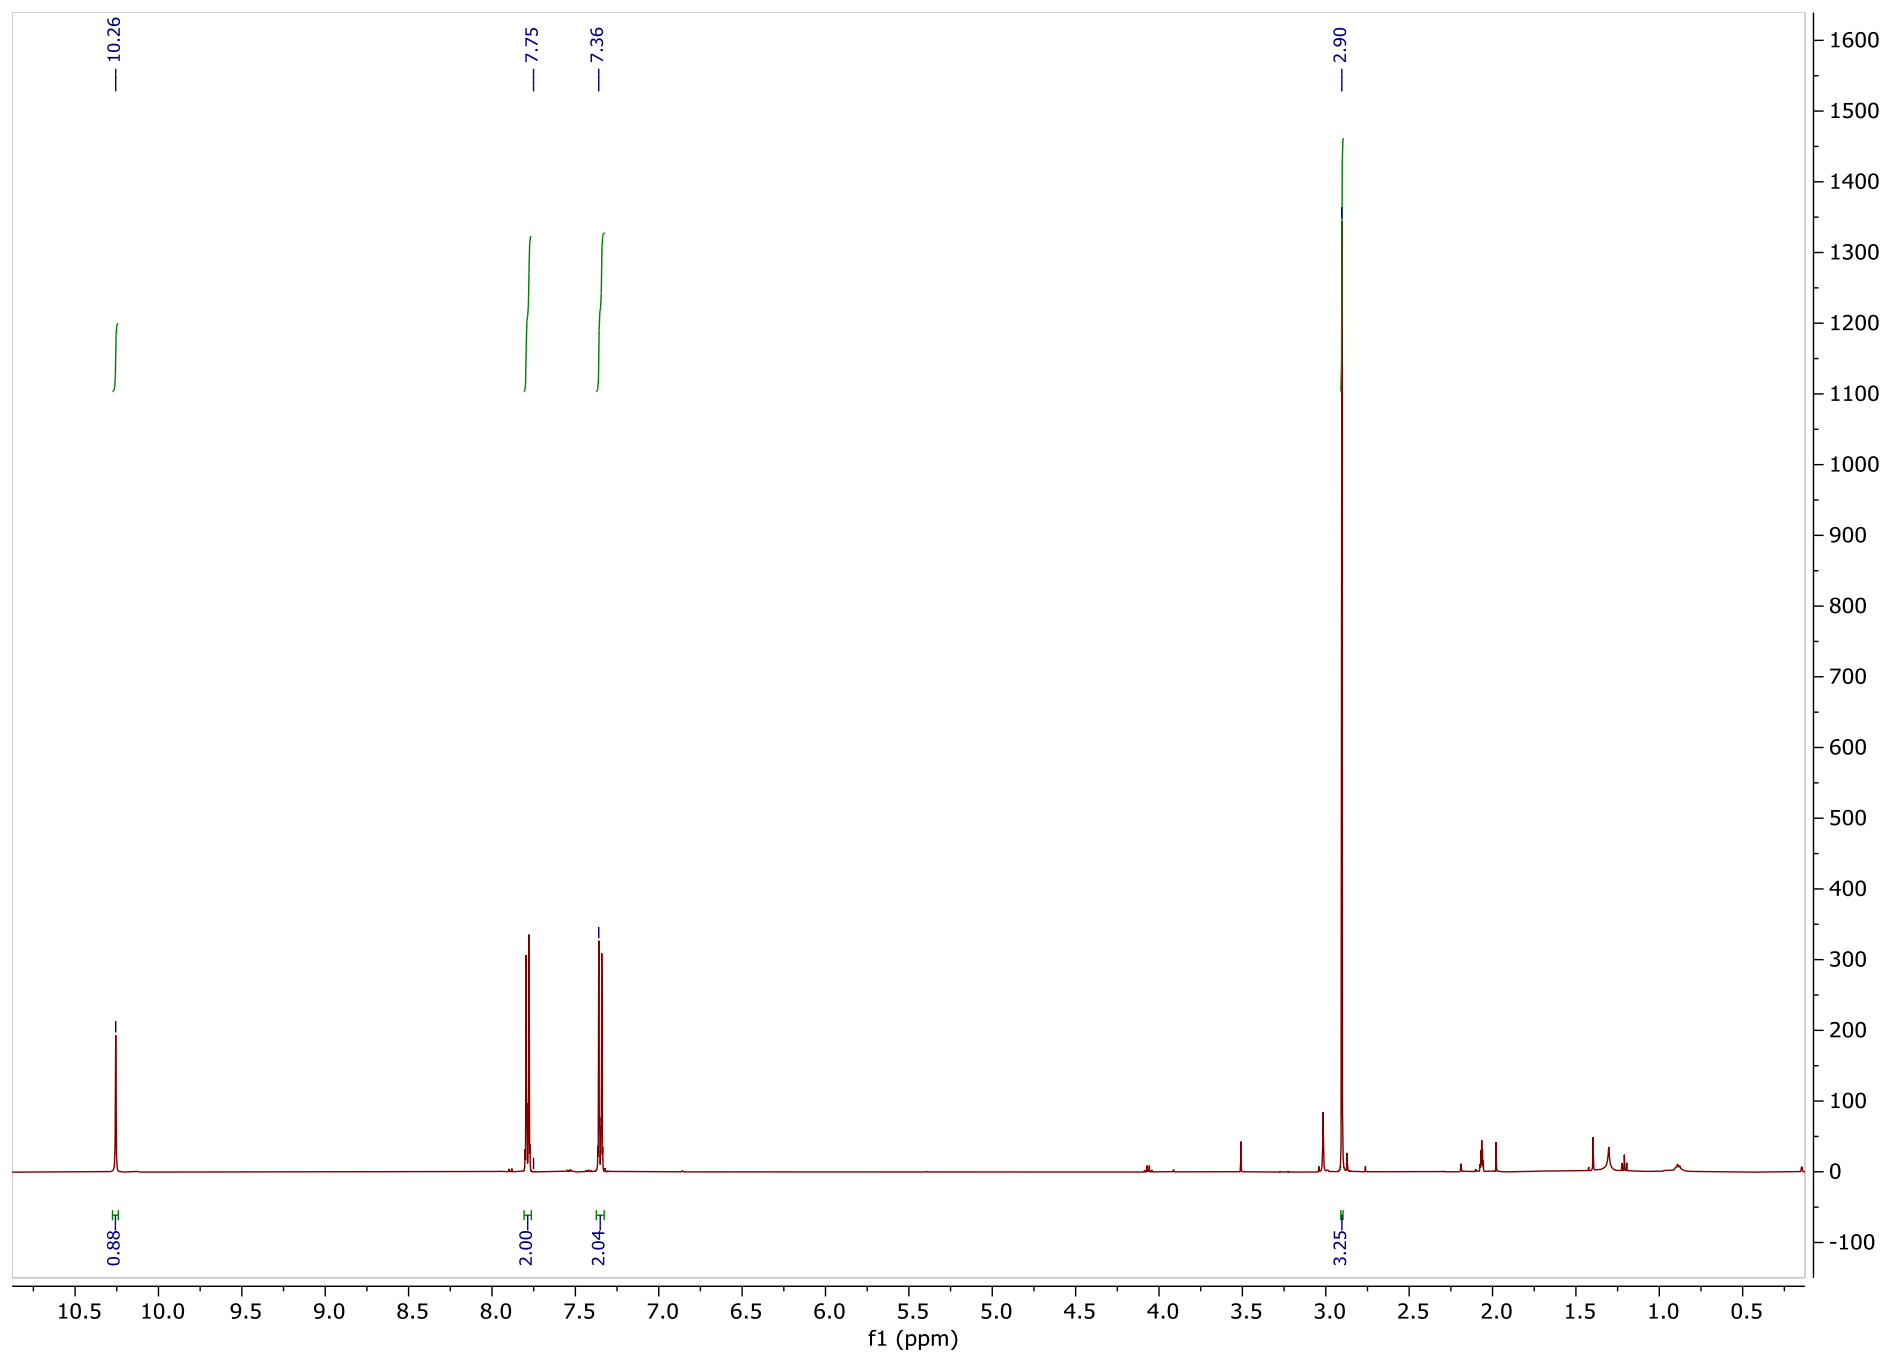

$^{13}\text{C}$  NMR of 3c, acetone, 126 MHz

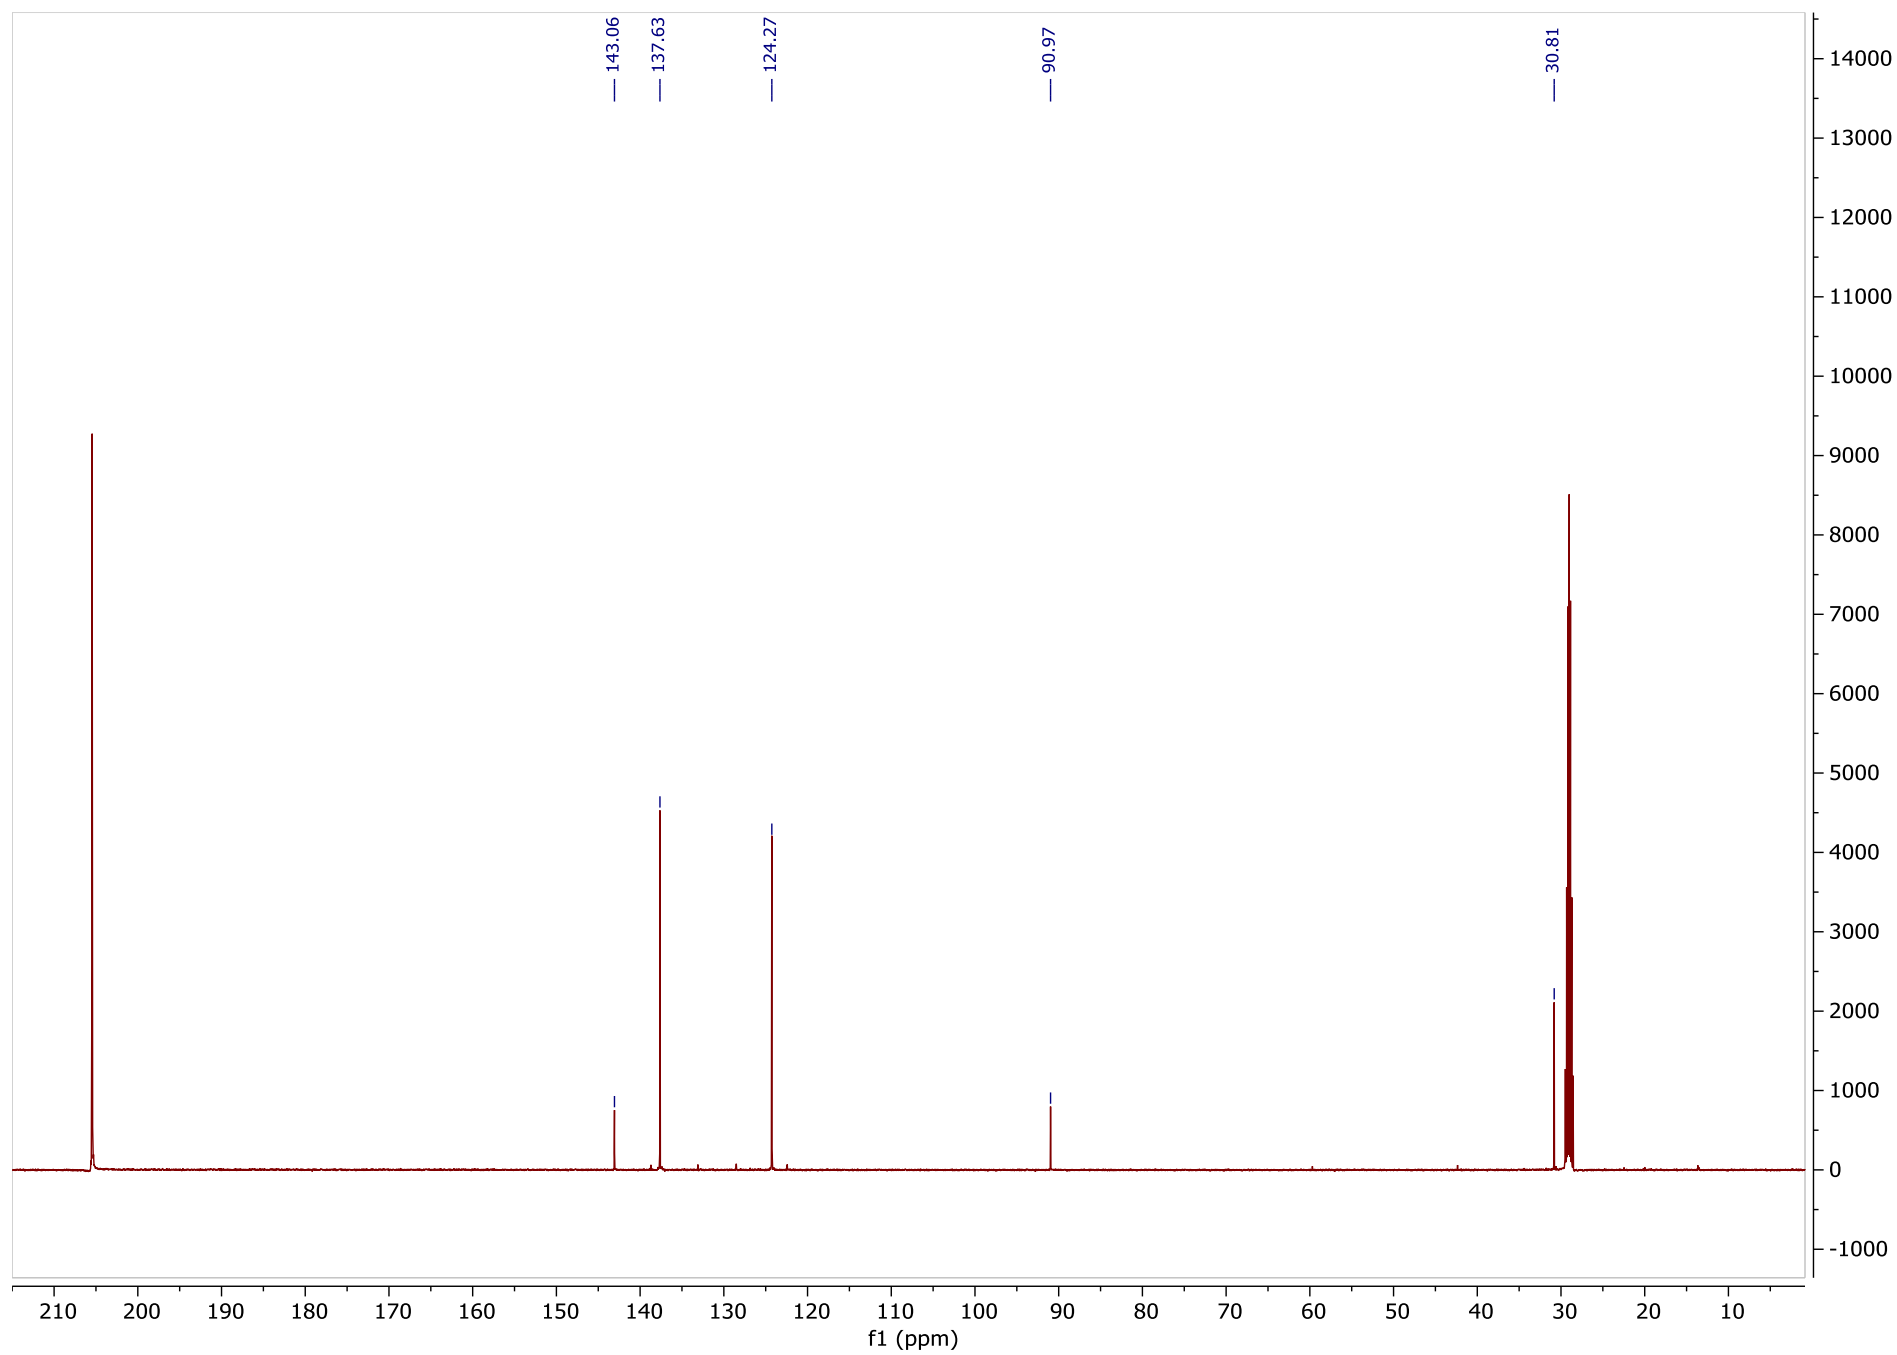

<sup>1</sup>H NMR of 3d, acetone, 500 MHz

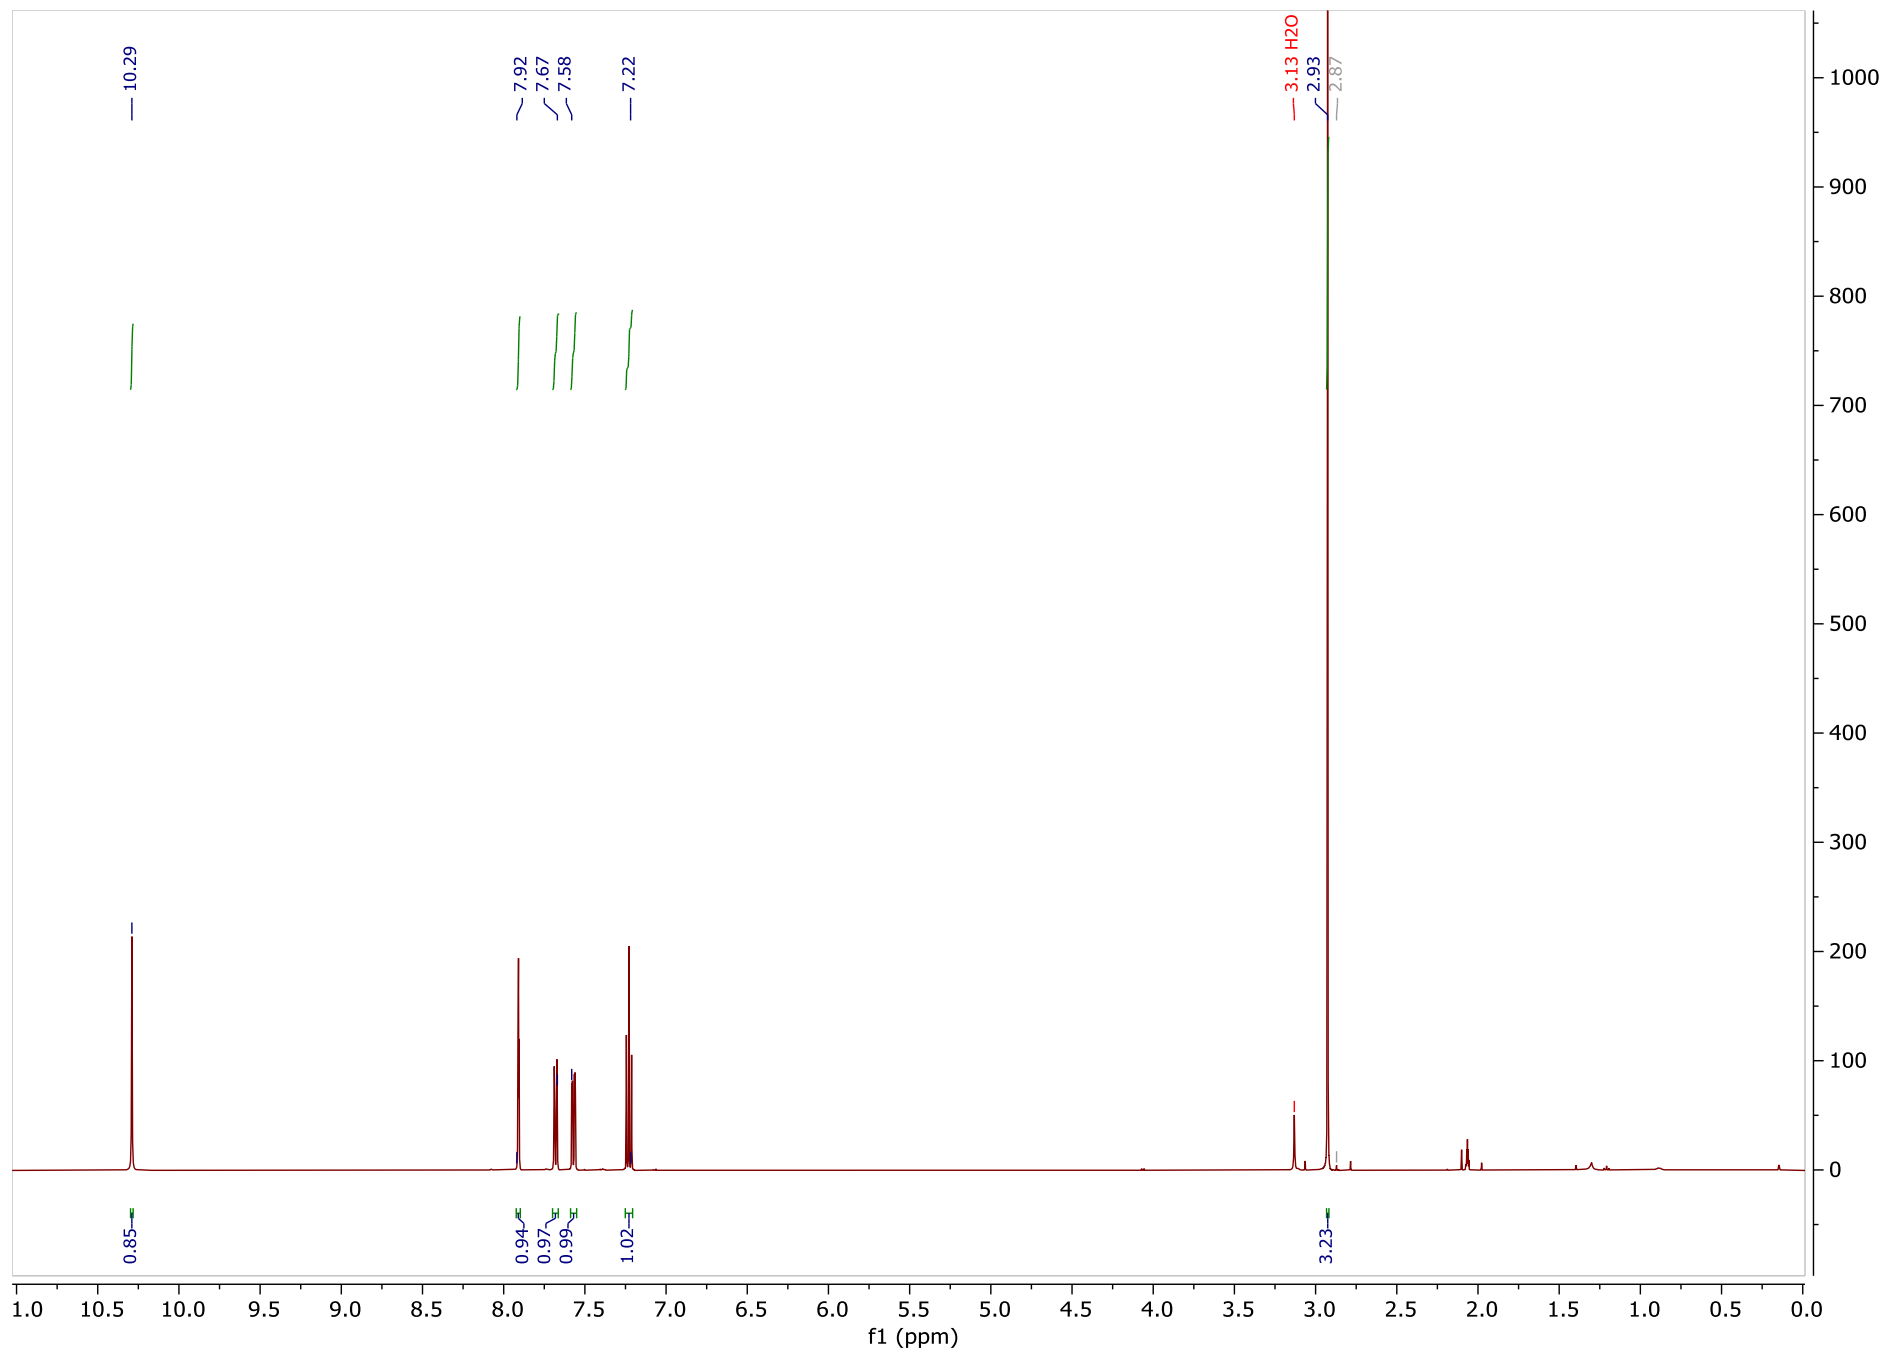

$^{13}\text{C}$  NMR of 3d, acetone, 126 MHz

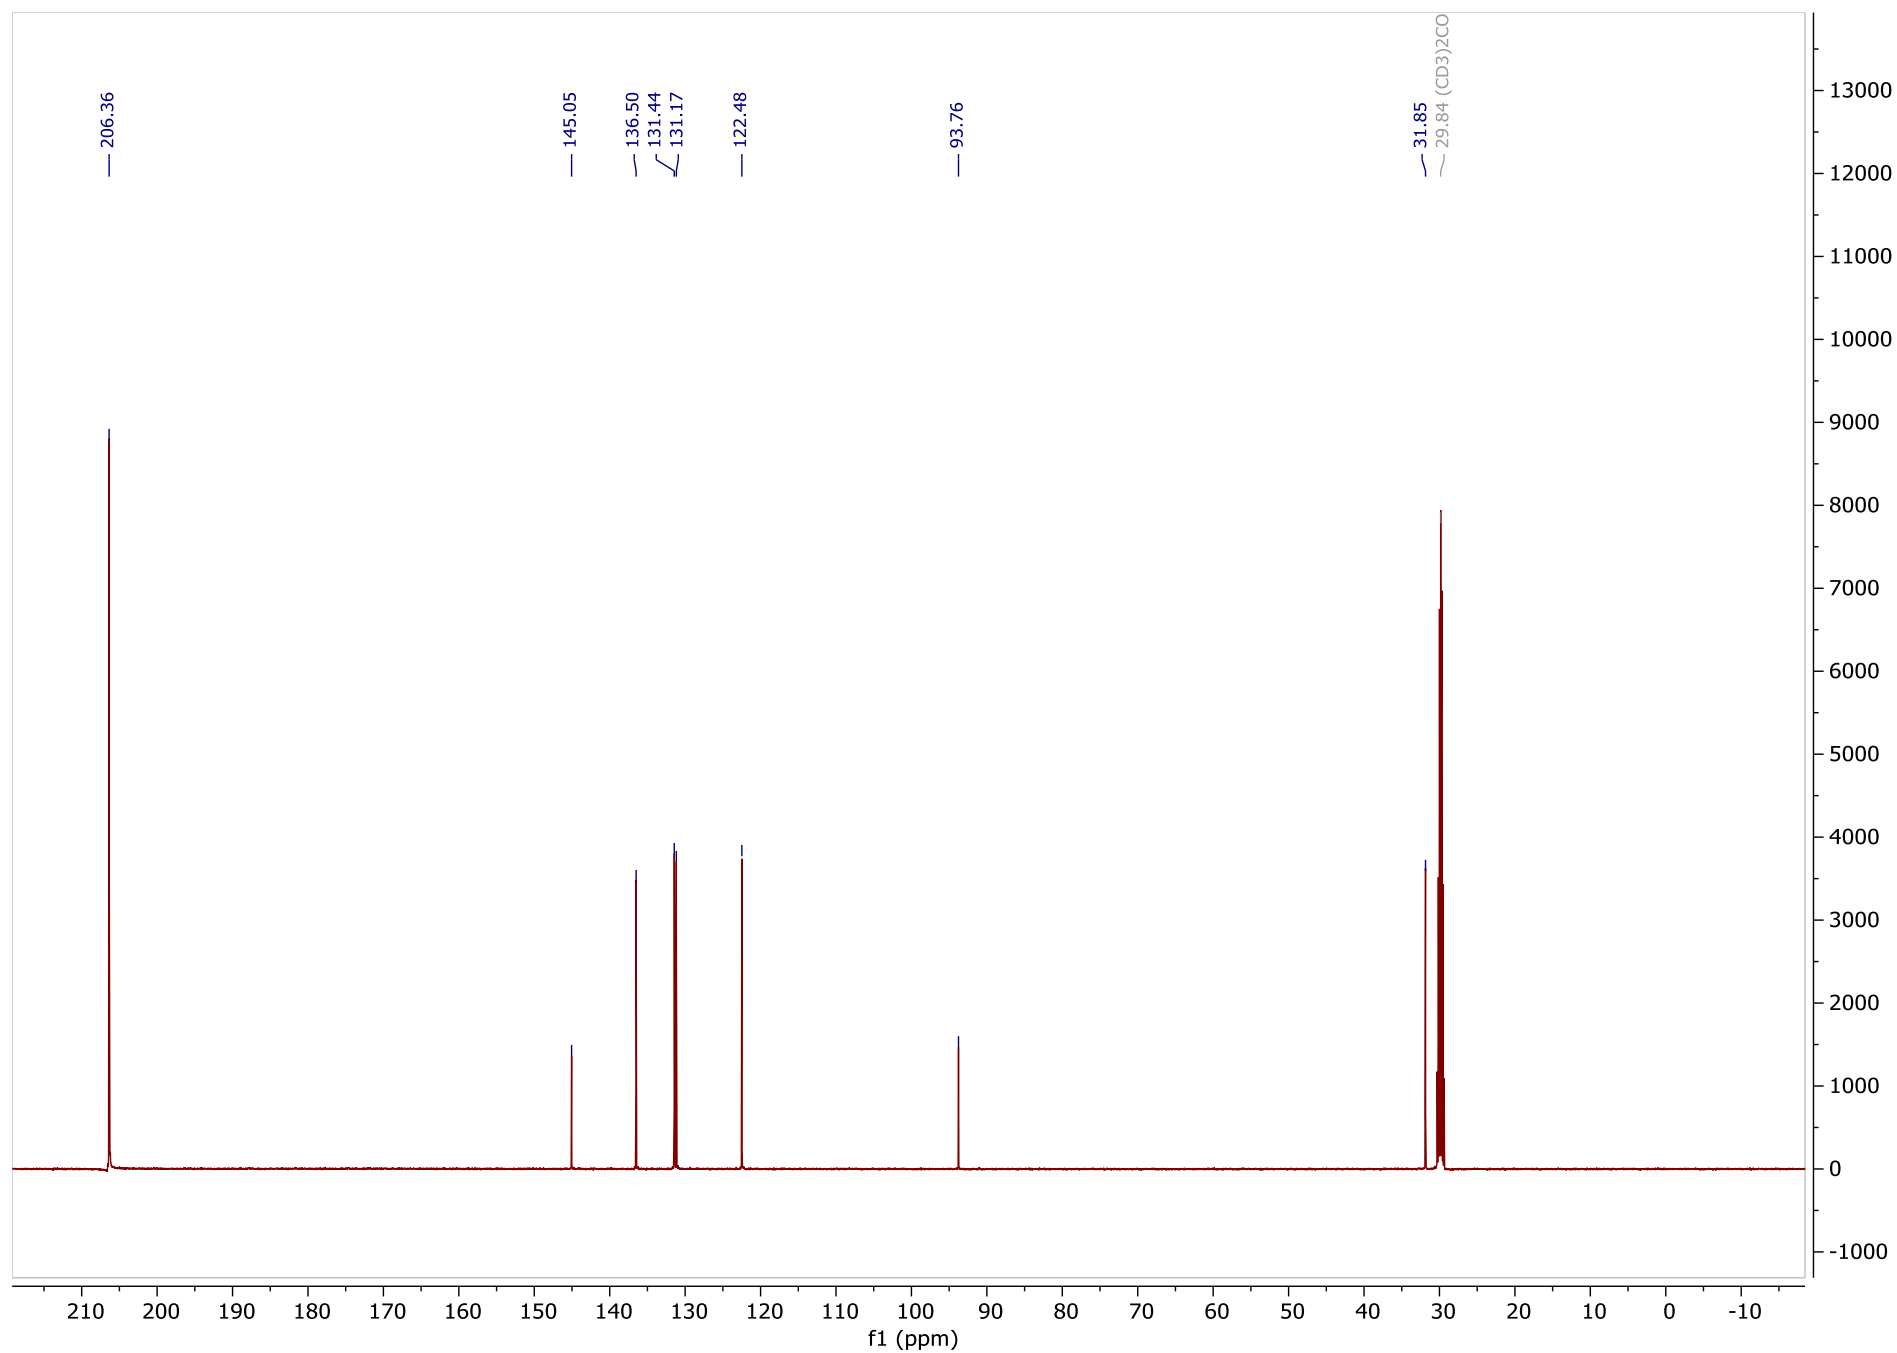

<sup>1</sup>H NMR of 3e, acetone, 500 MHz

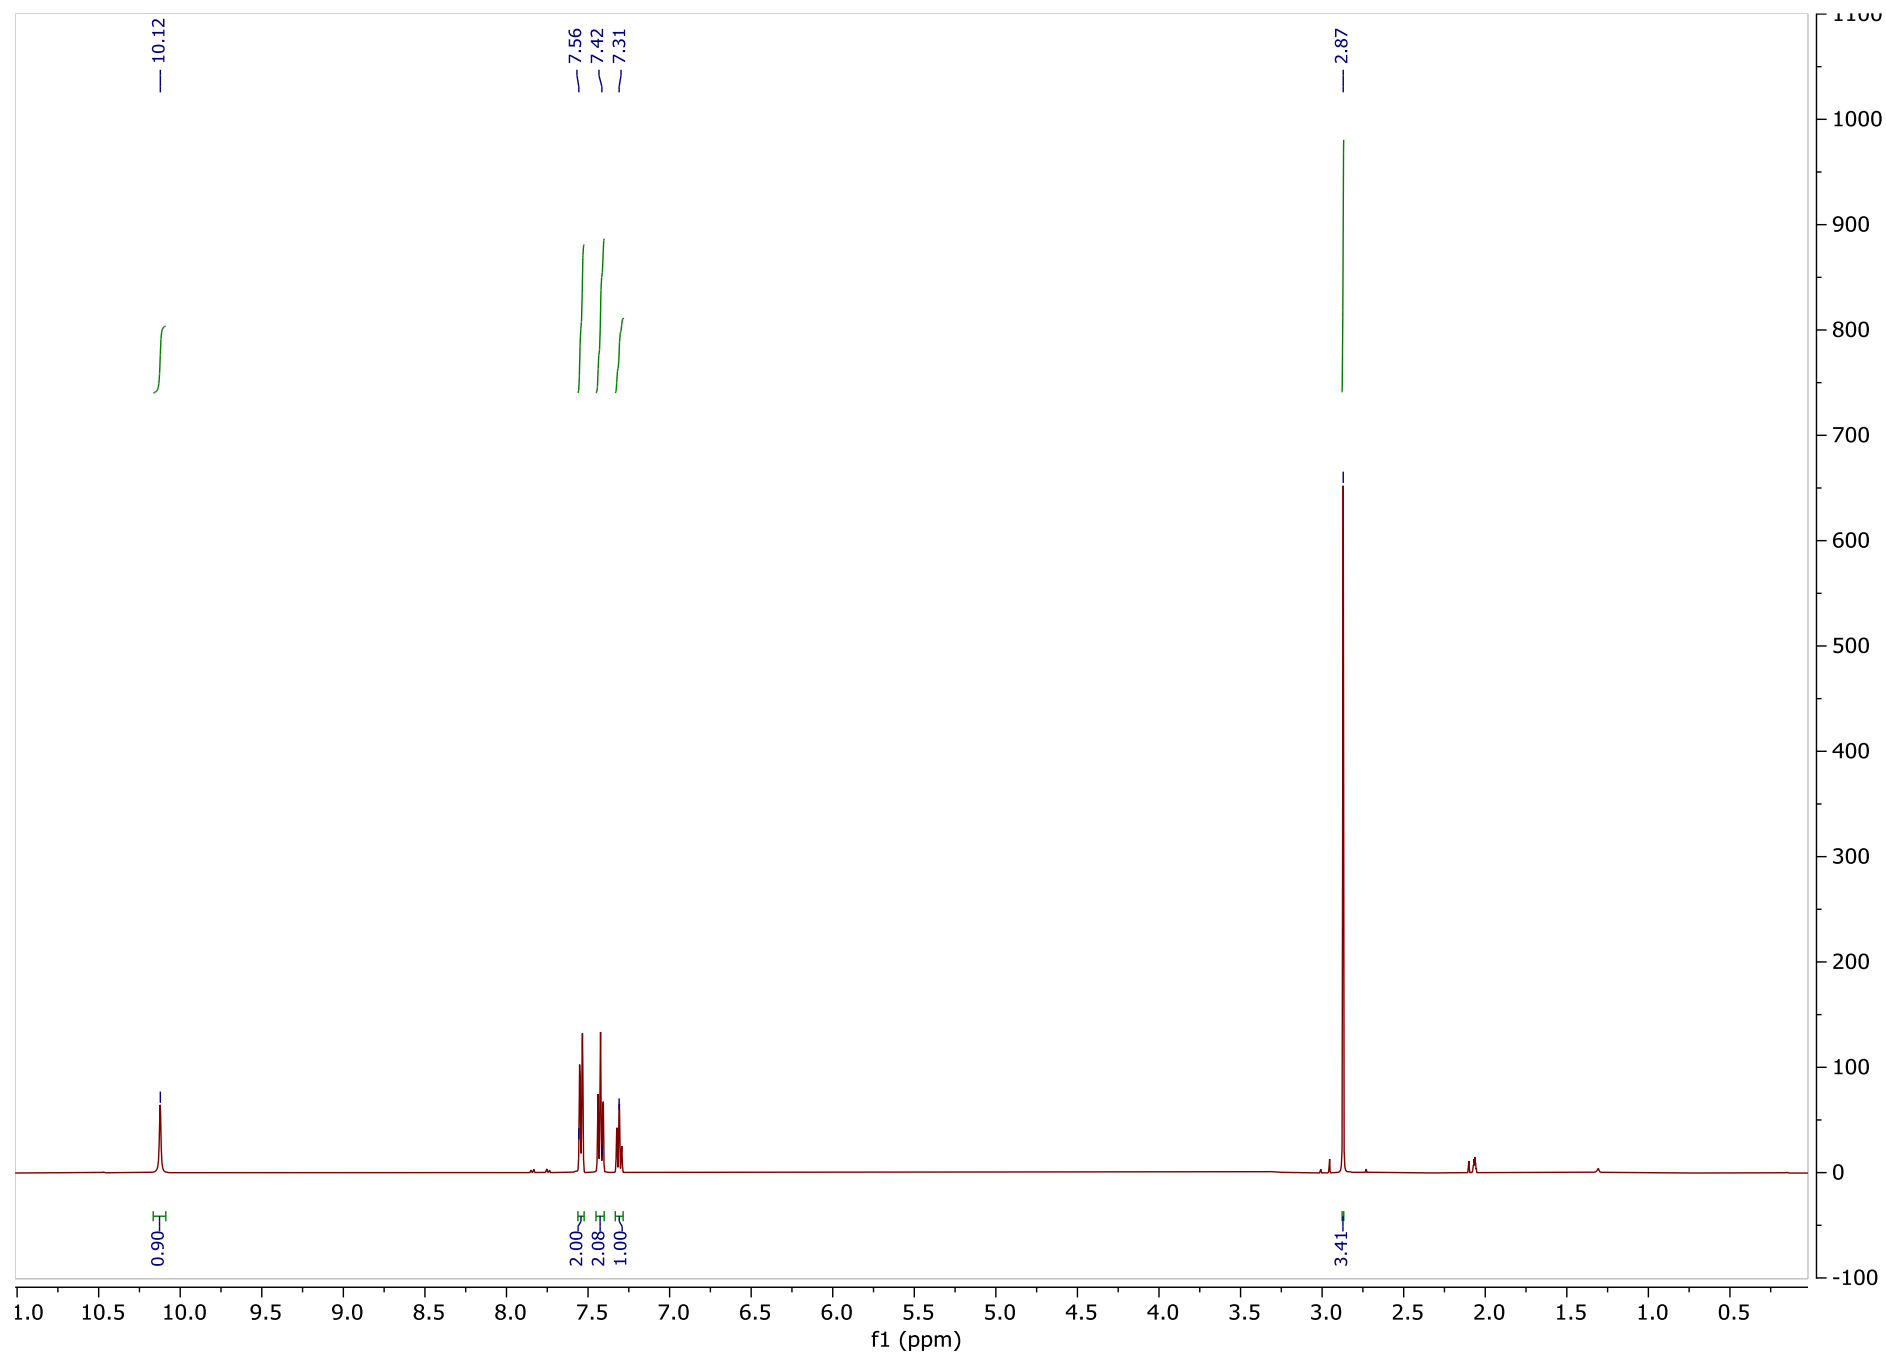

$^{13}\text{C}$  NMR of 3e, acetone, 126 MHz

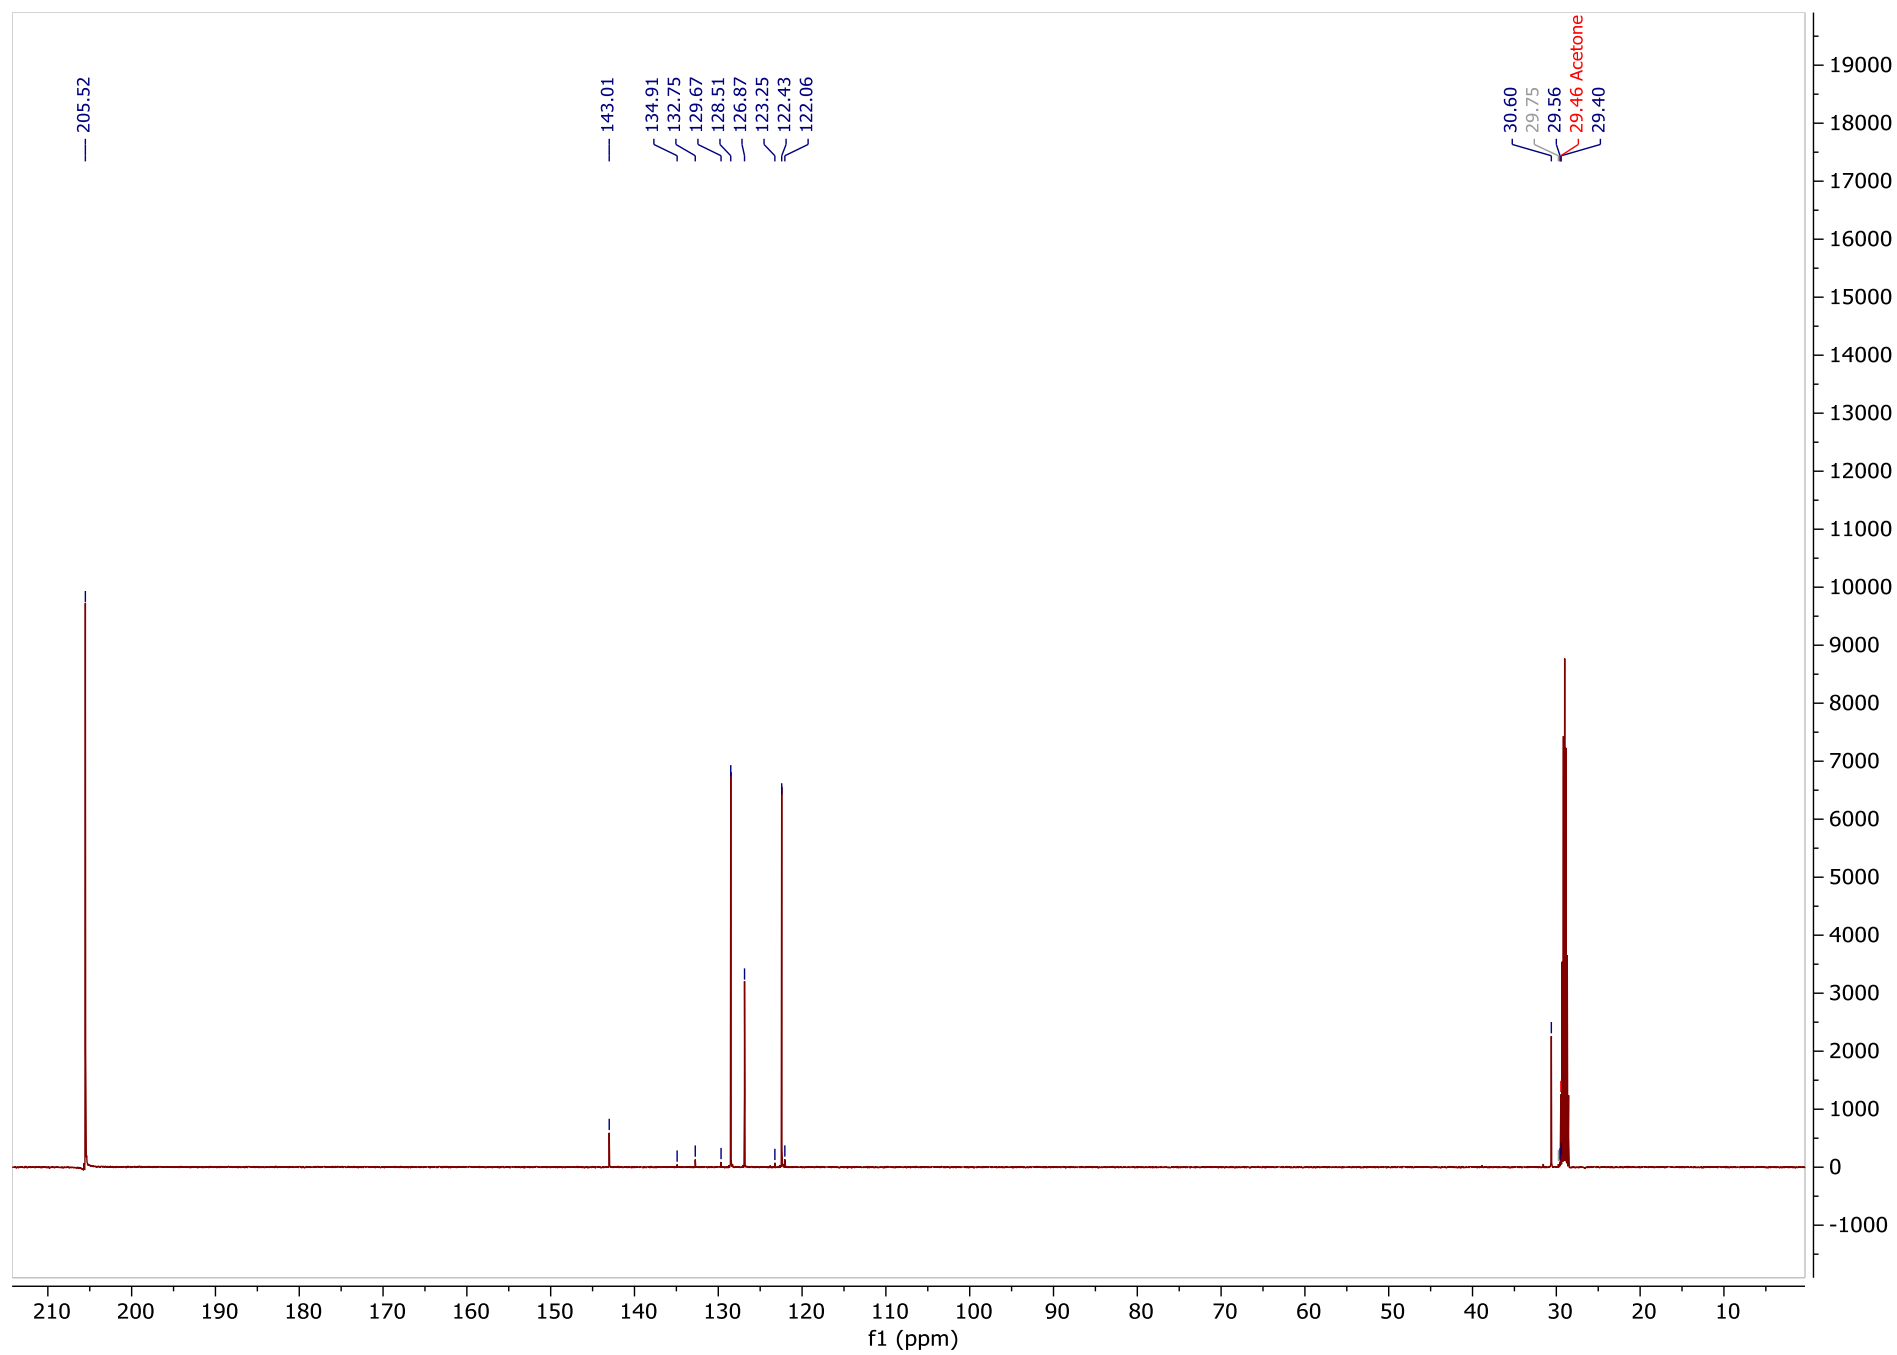

<sup>1</sup>H NMR of 3f, acetone, 500 MHz

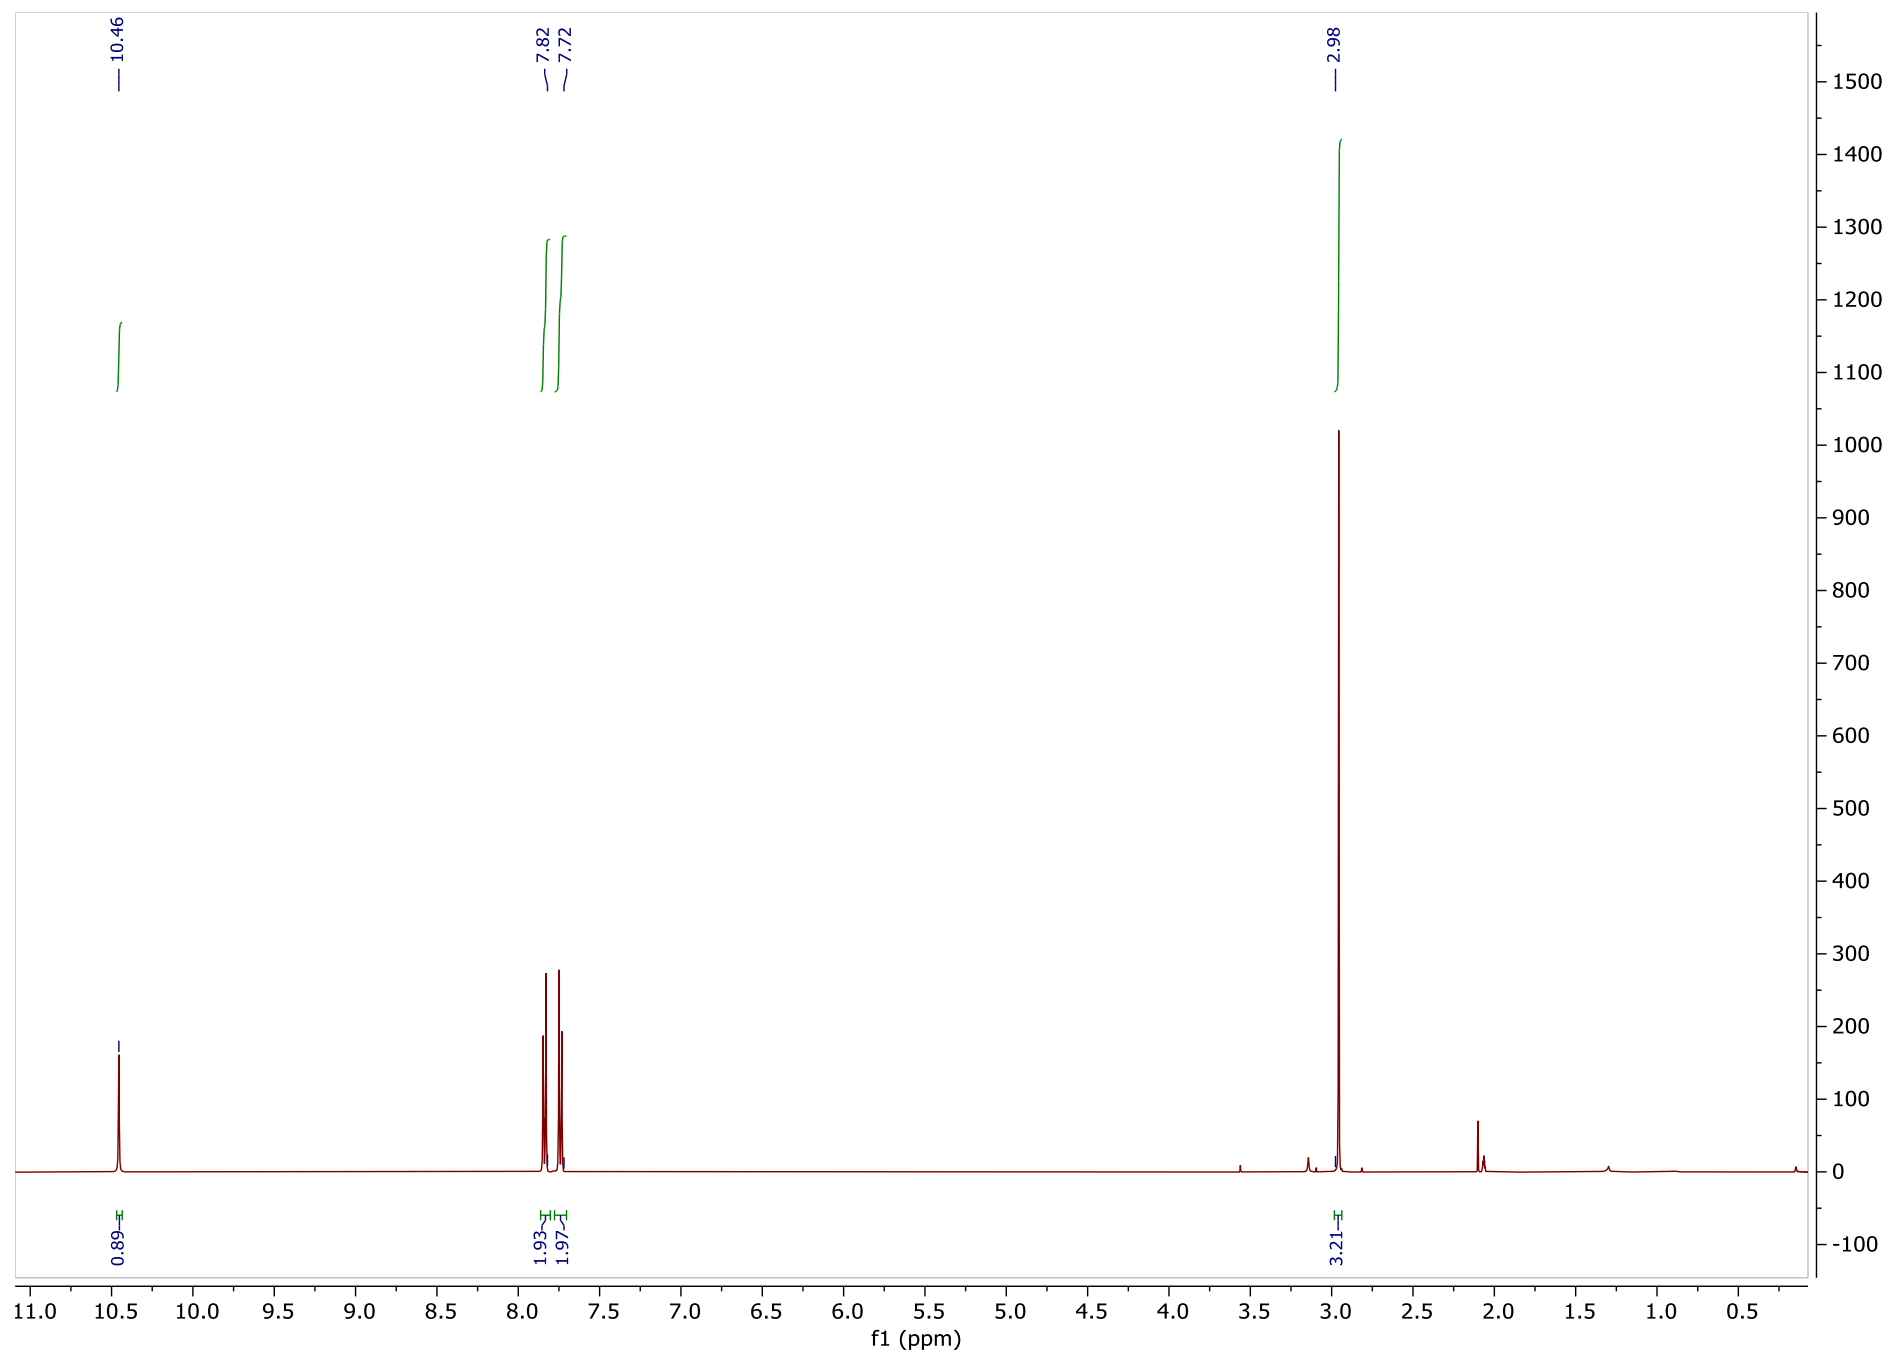



<sup>13</sup>C NMR of 3f, acetone, 126 MHz

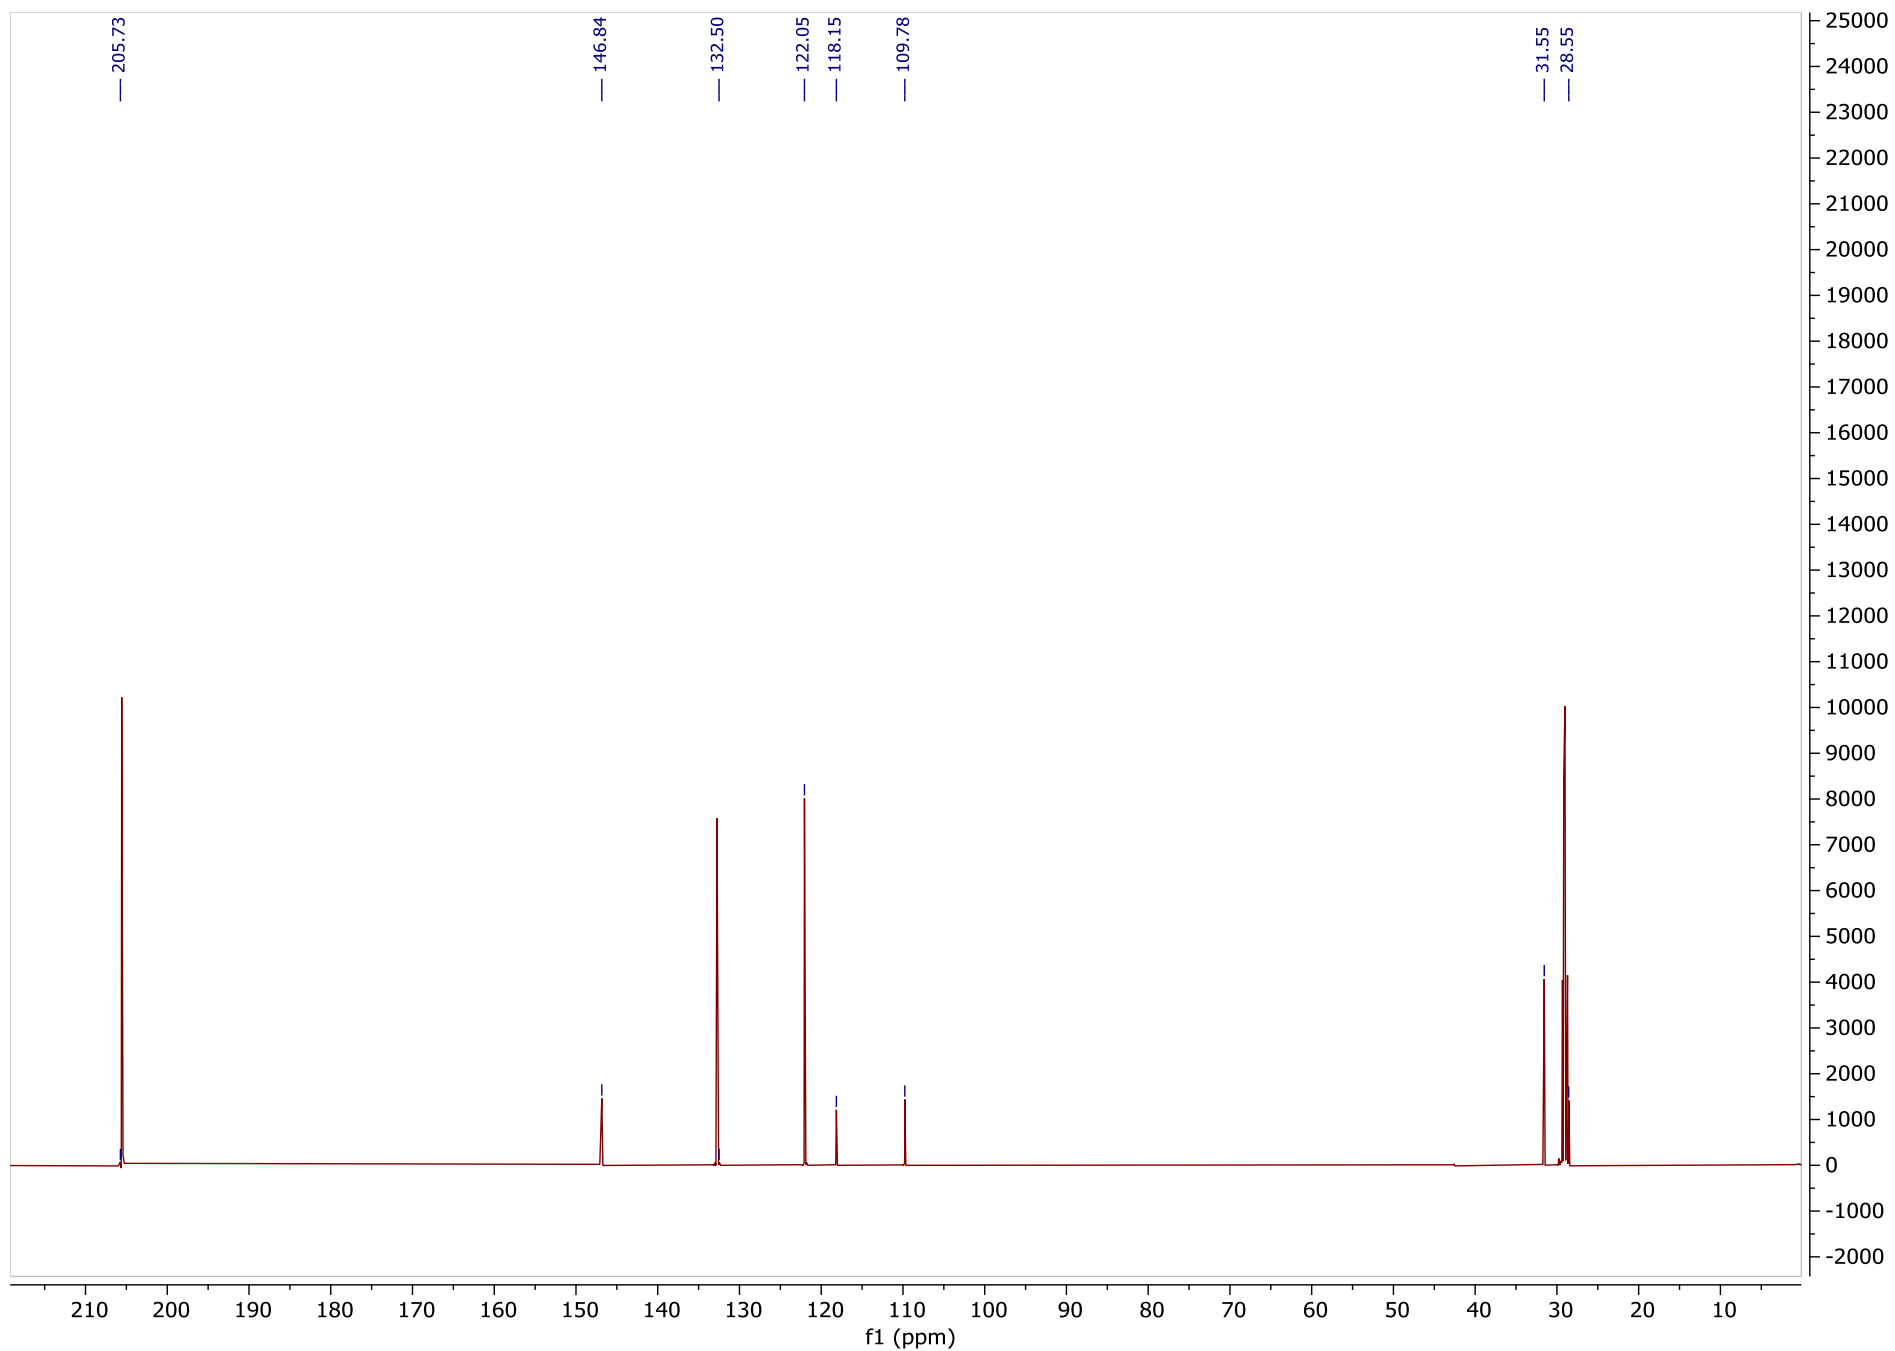

<sup>1</sup>H NMR of 3g, acetone, 500 MHz

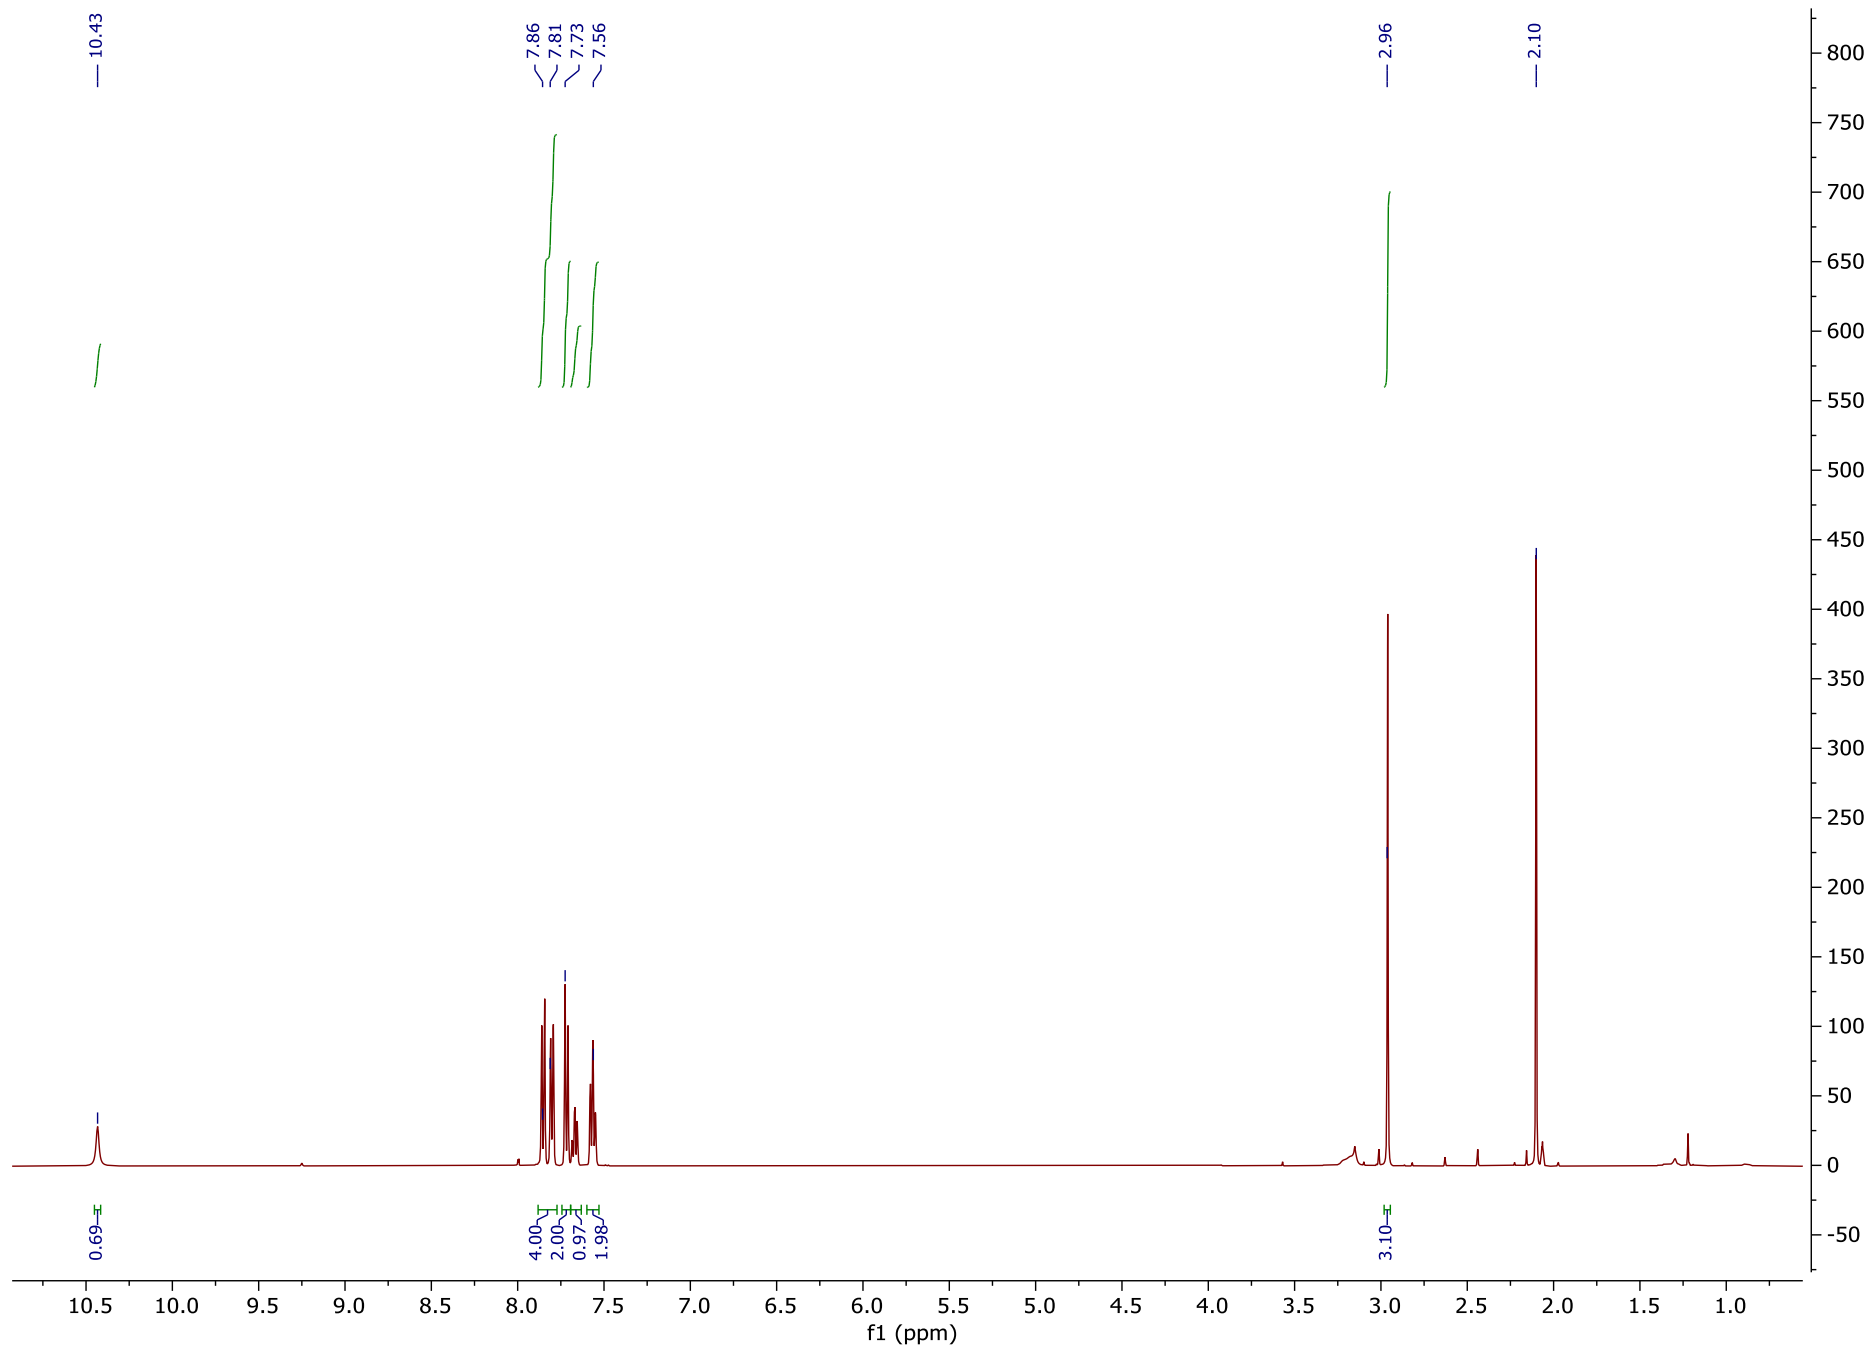

$^{13}\text{C}$  NMR of 3g, acetone, 126 MHz

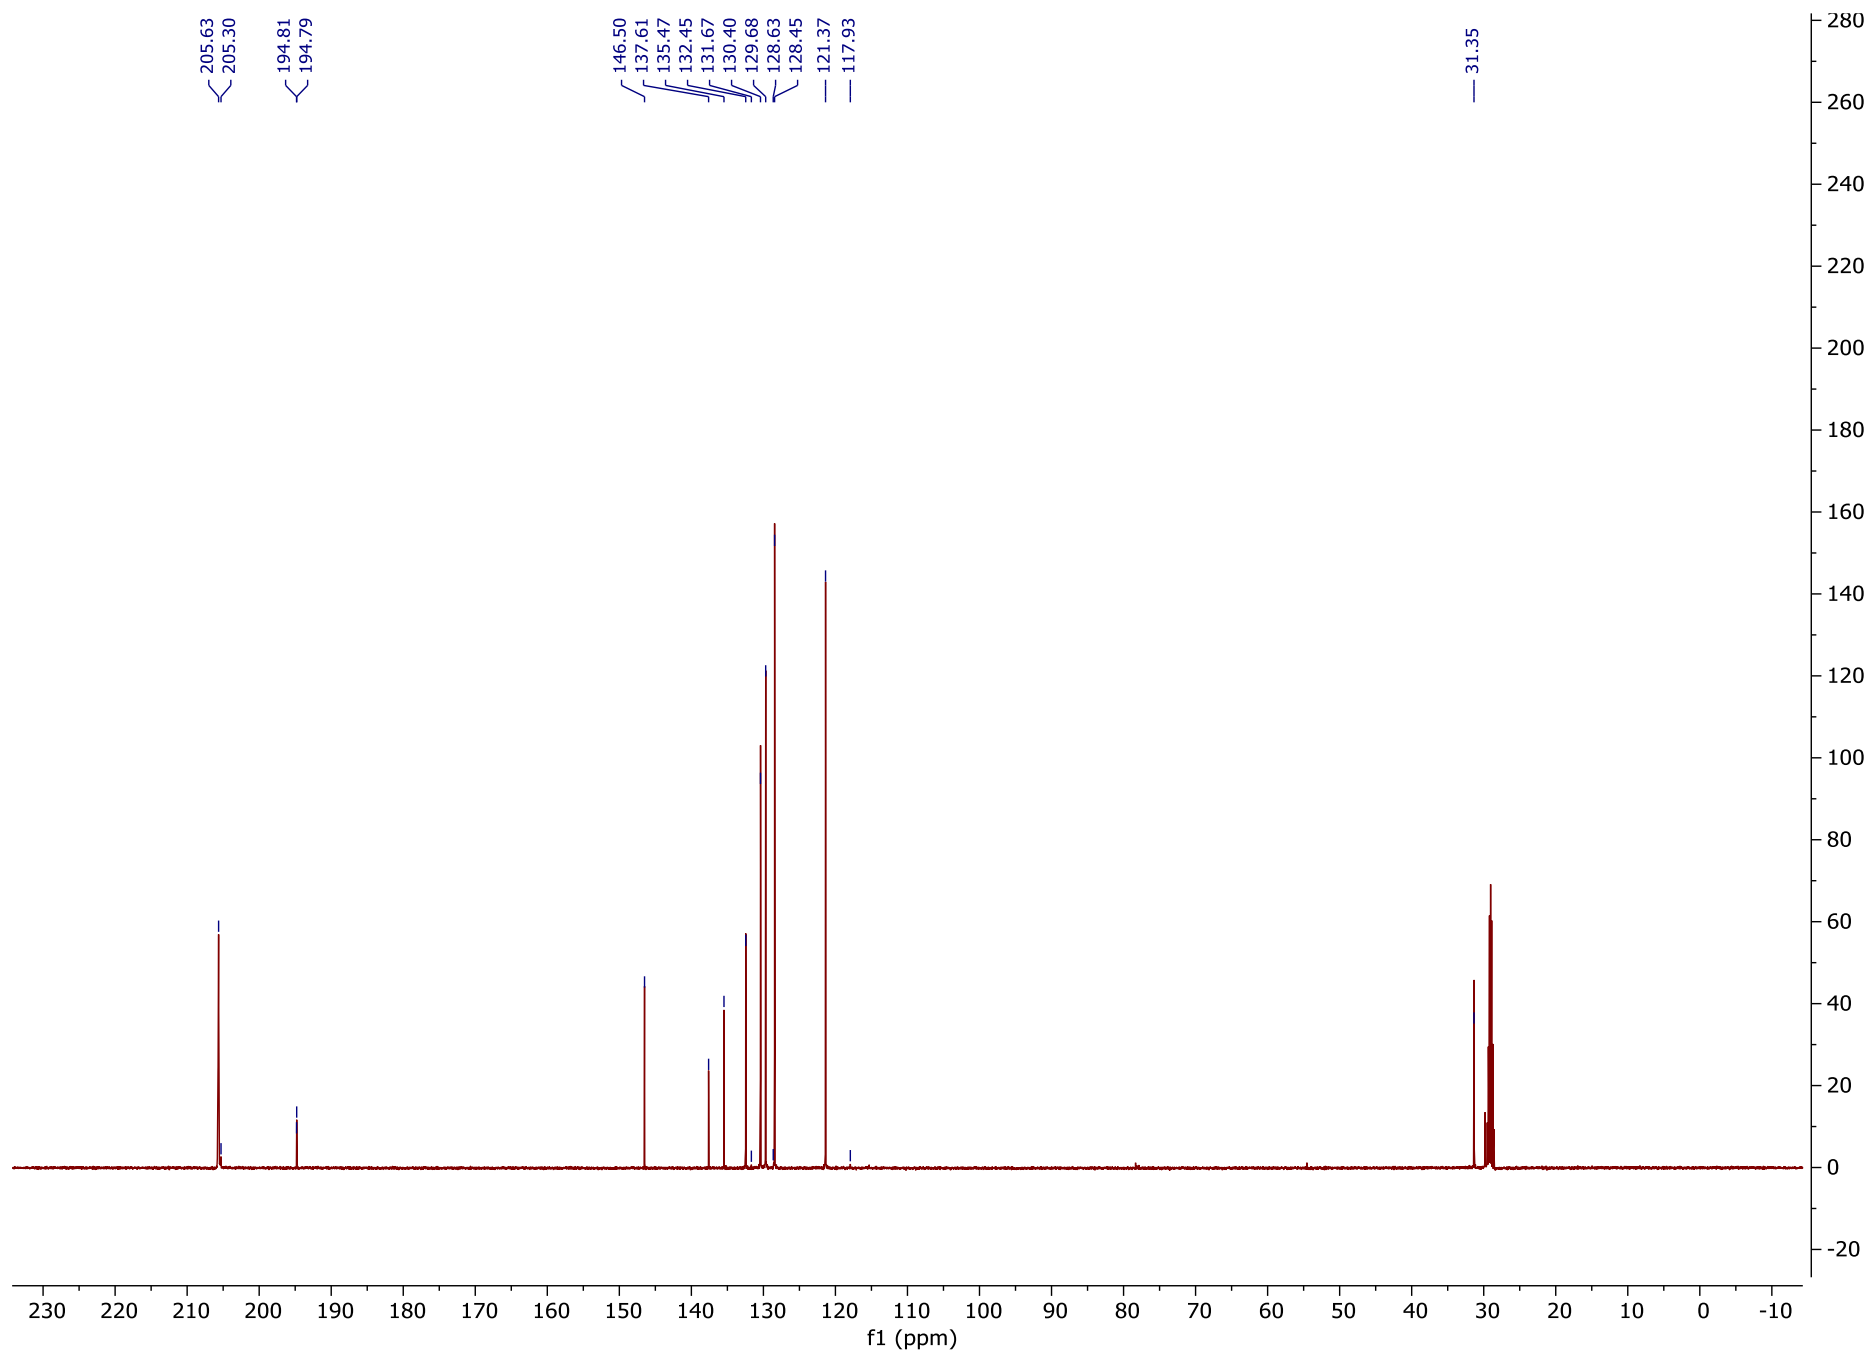

<sup>1</sup>H NMR of 3h, acetone, 500 MHz

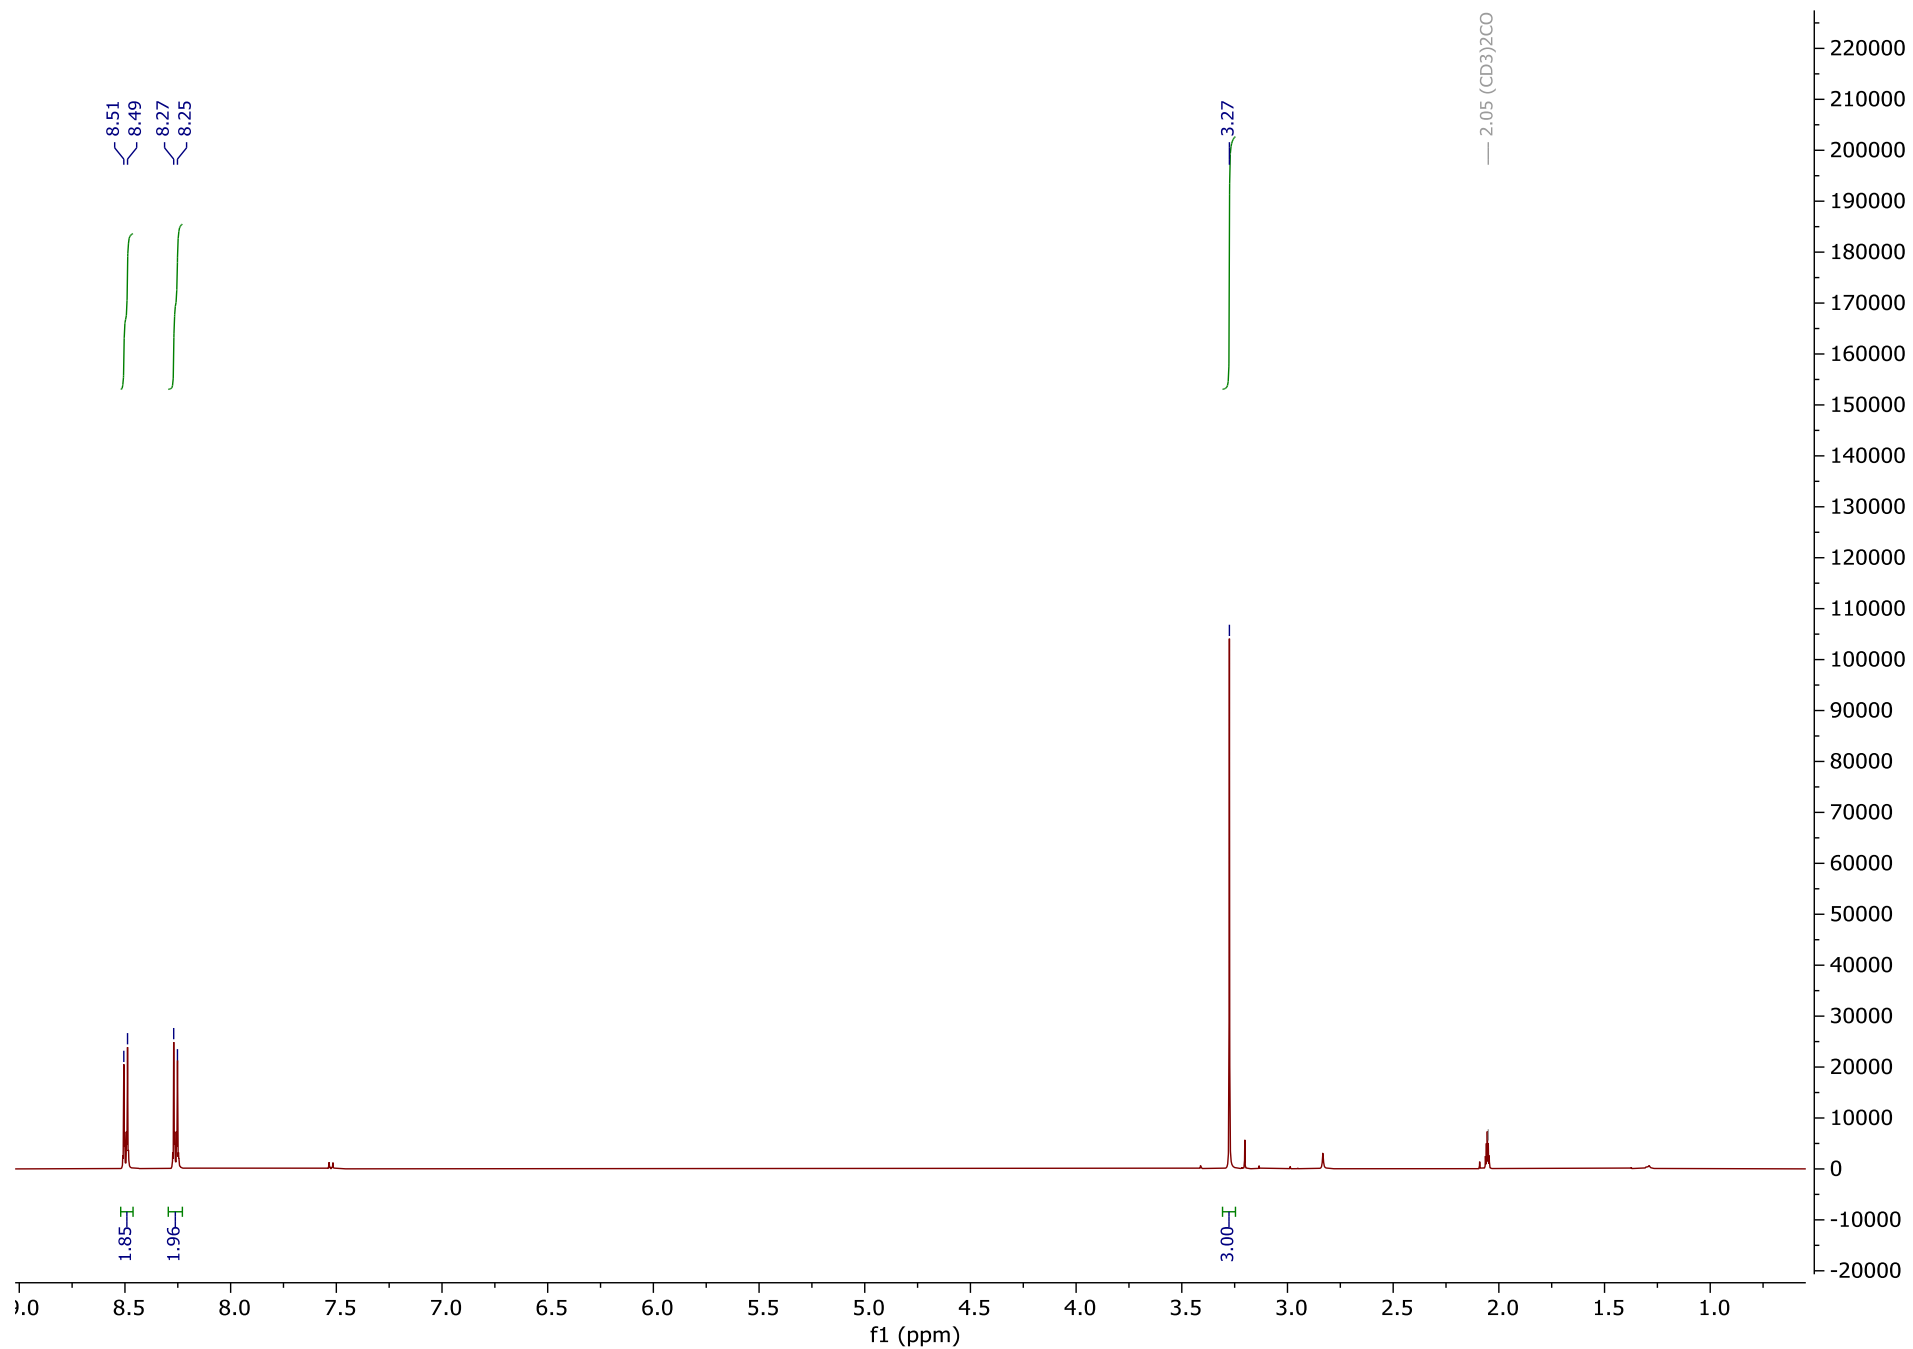

$^{13}\text{C}$  NMR of 3h, acetone, 126 MHz

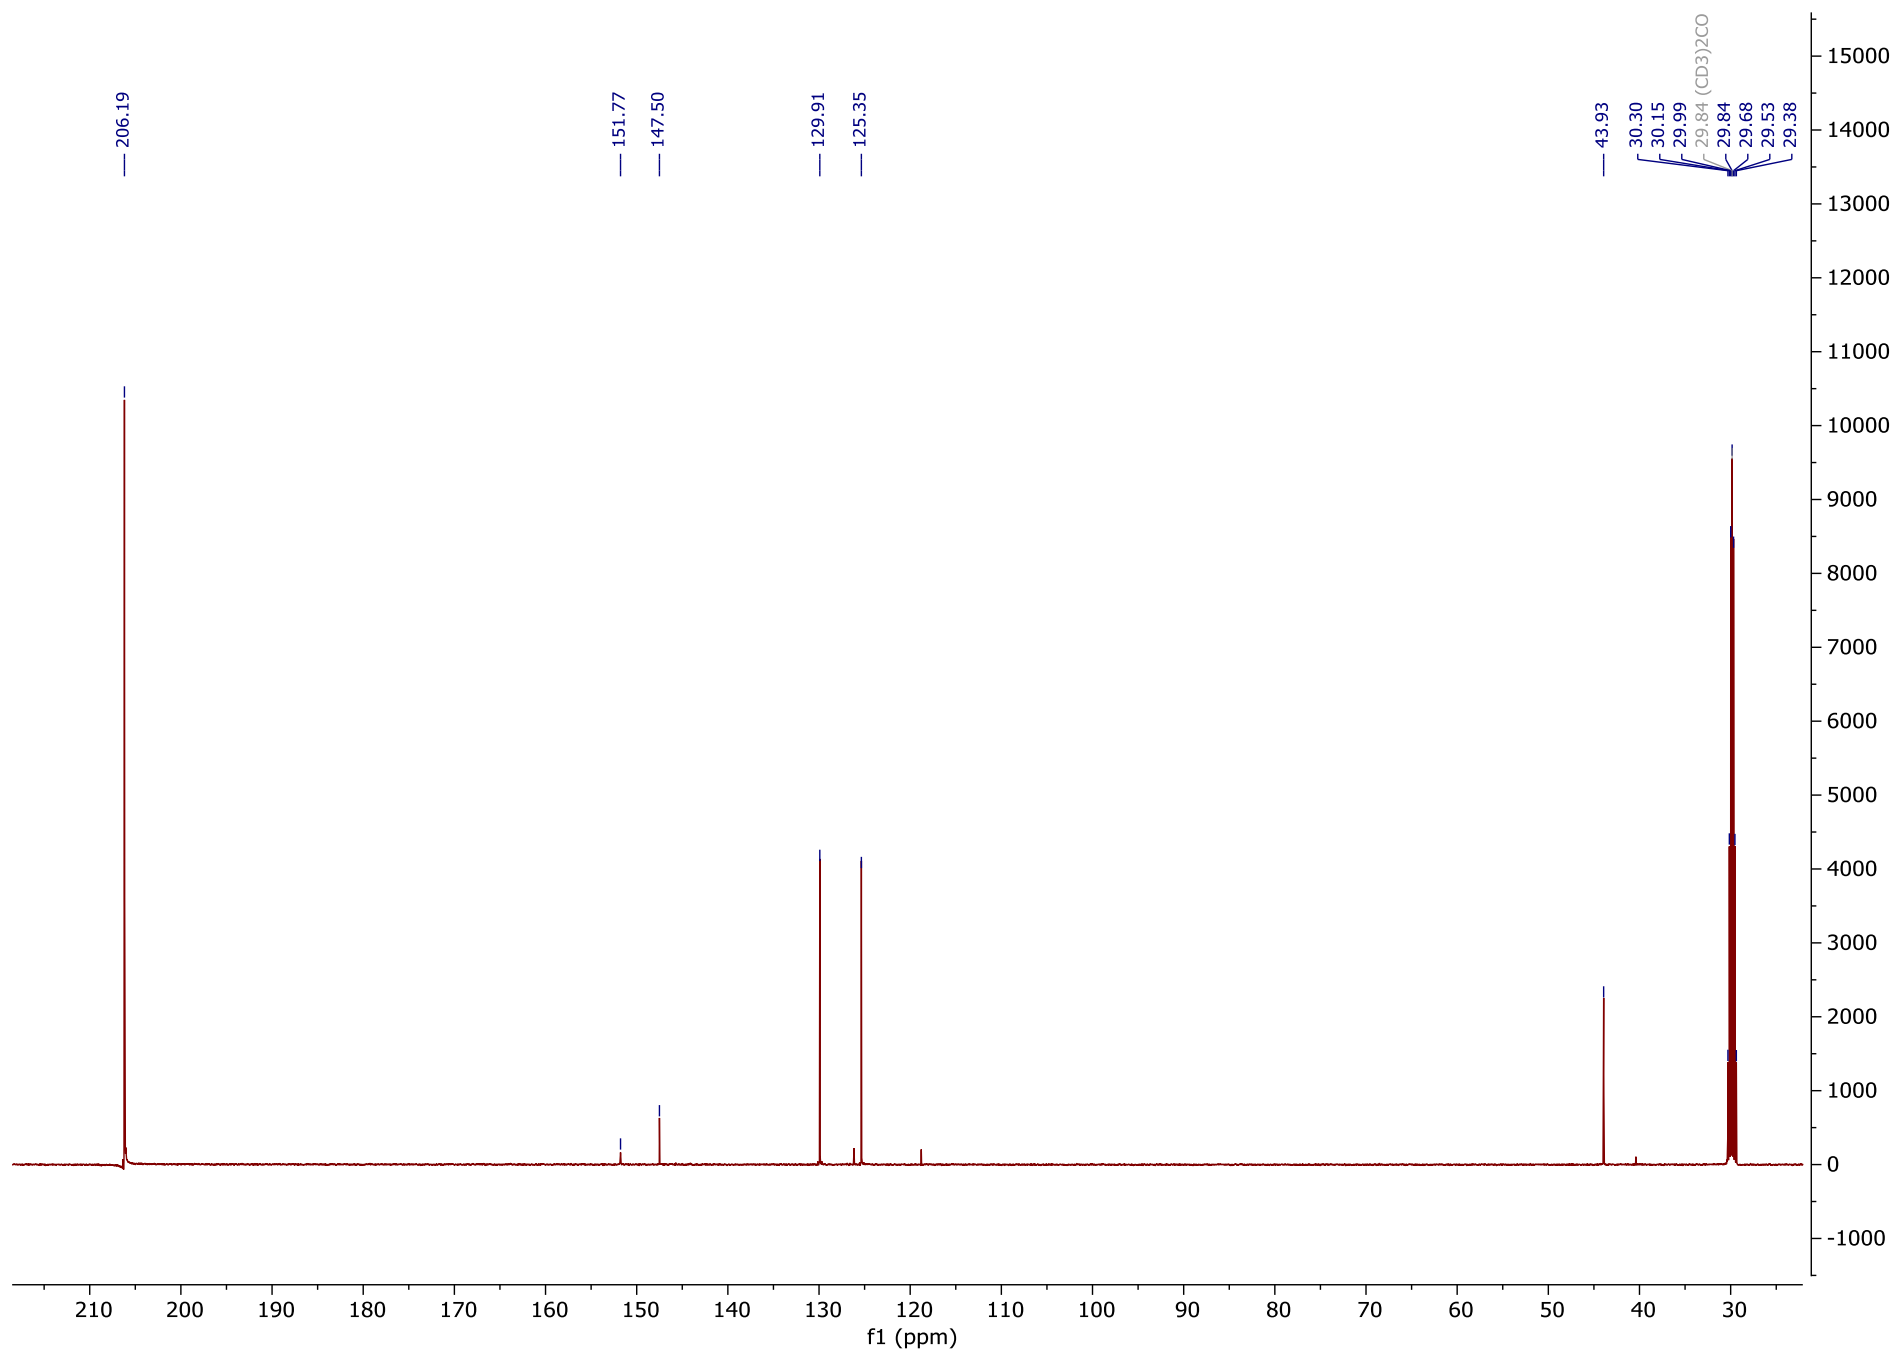

<sup>1</sup>H NMR of 3i, acetone, 500 MHz

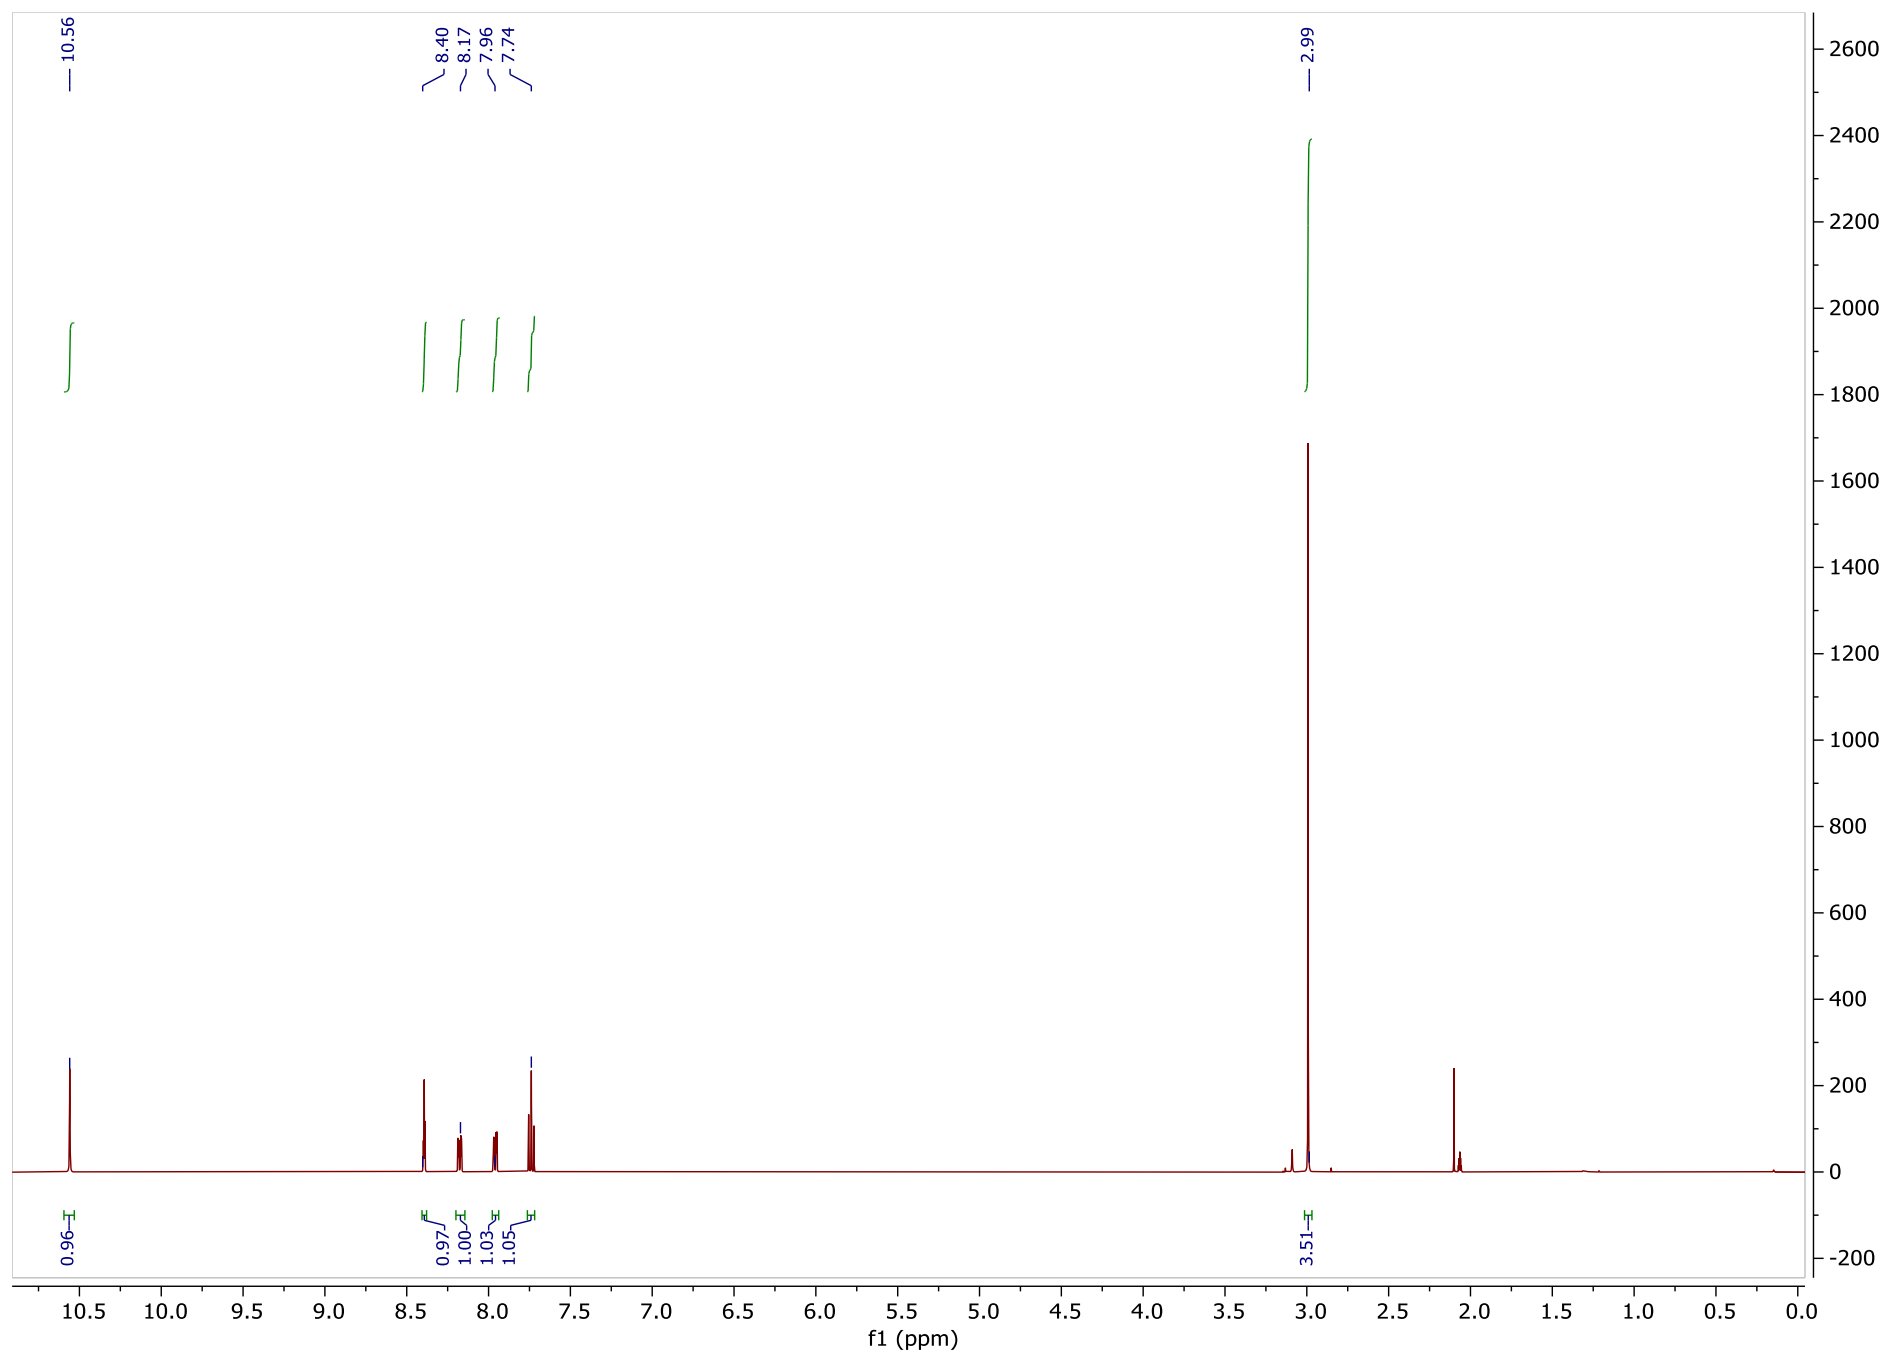

$^{13}\text{C}$  NMR of 3i, acetone, 126 MHz

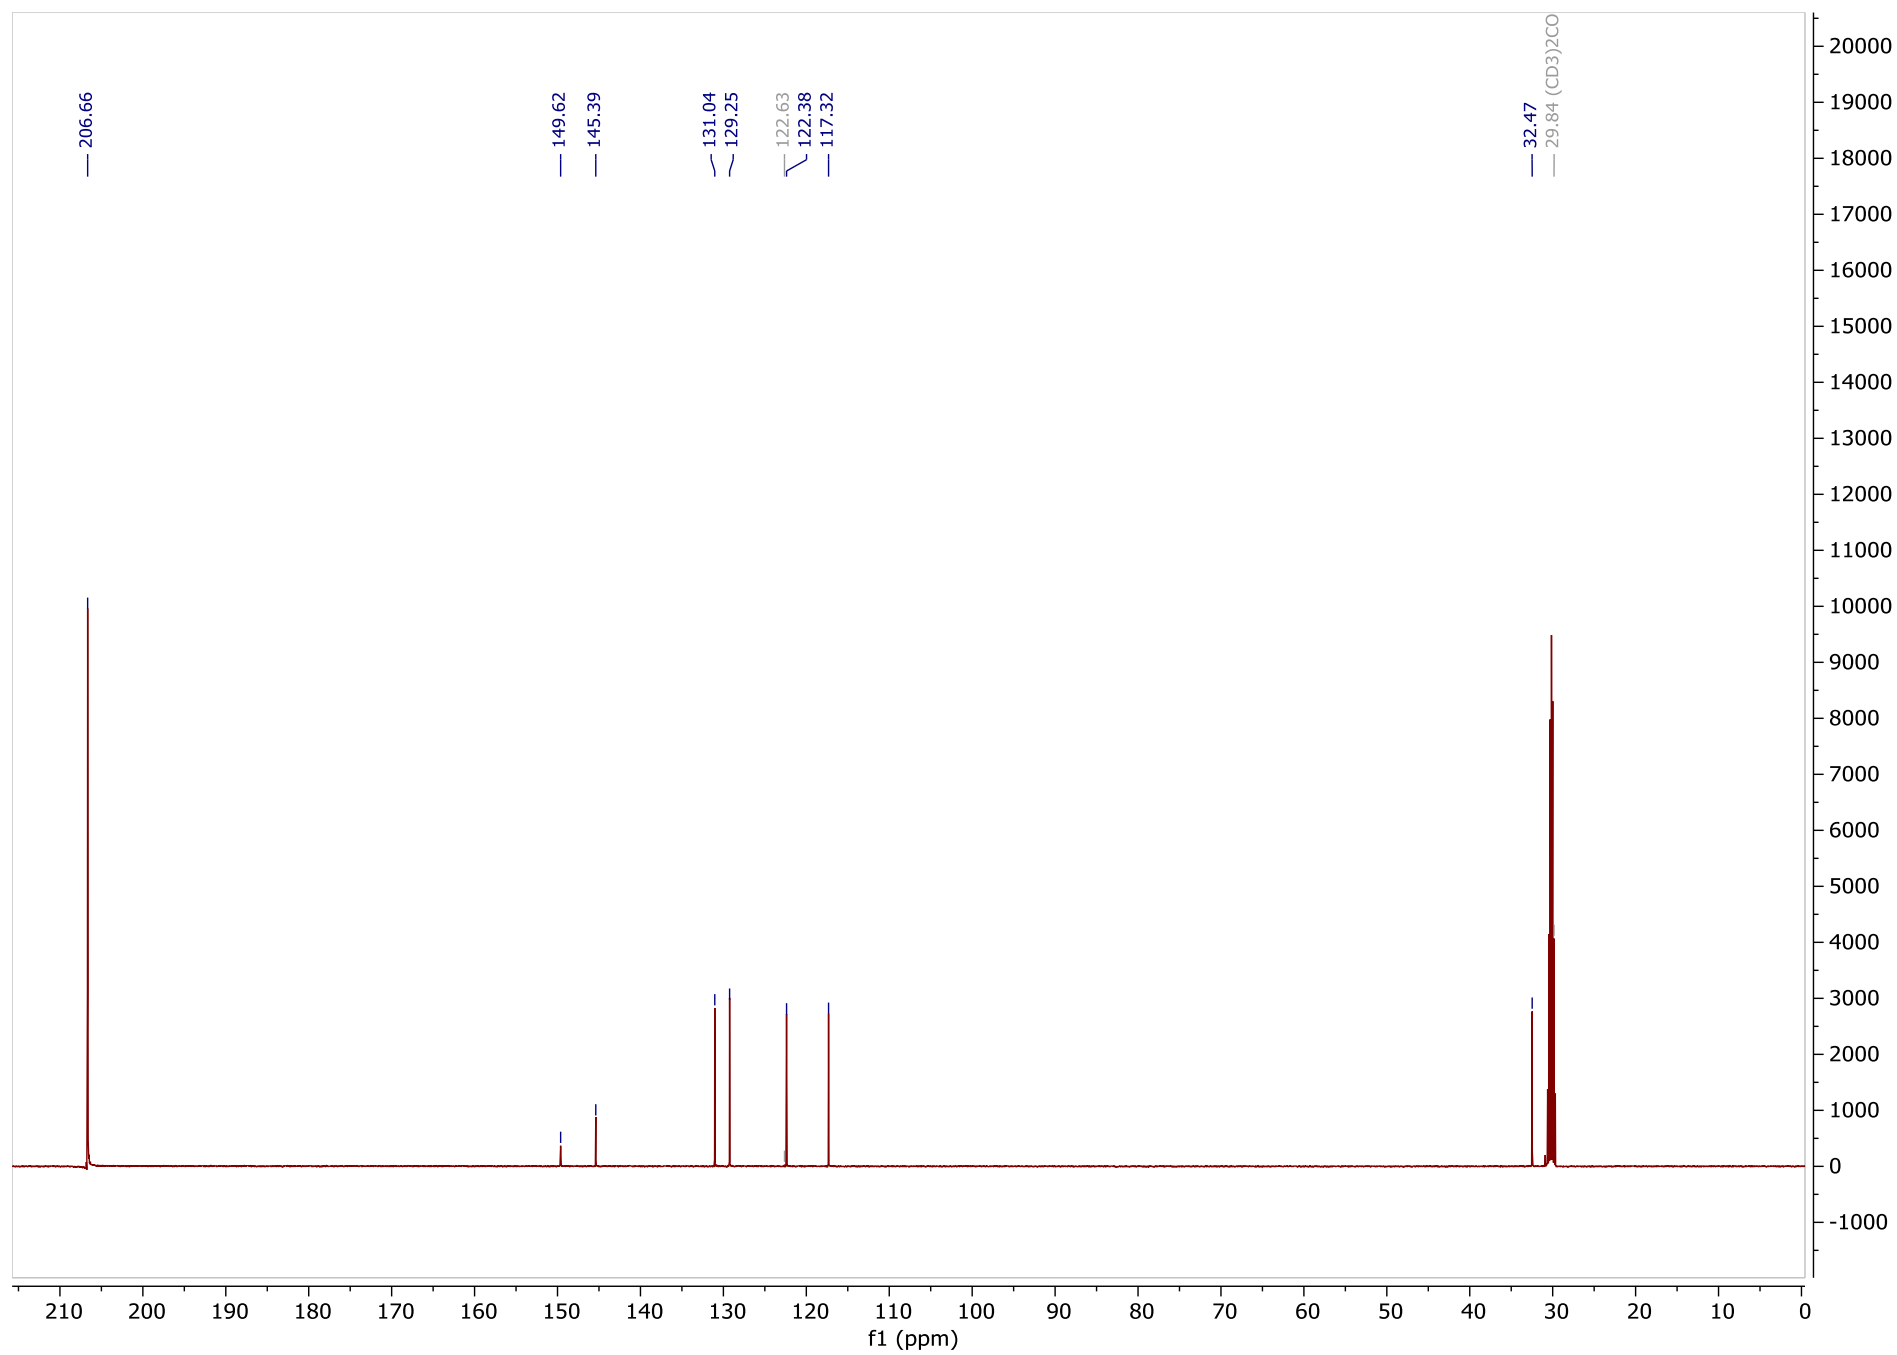

$^1\text{H}$  NMR of 3j, acetone, 500 MHz

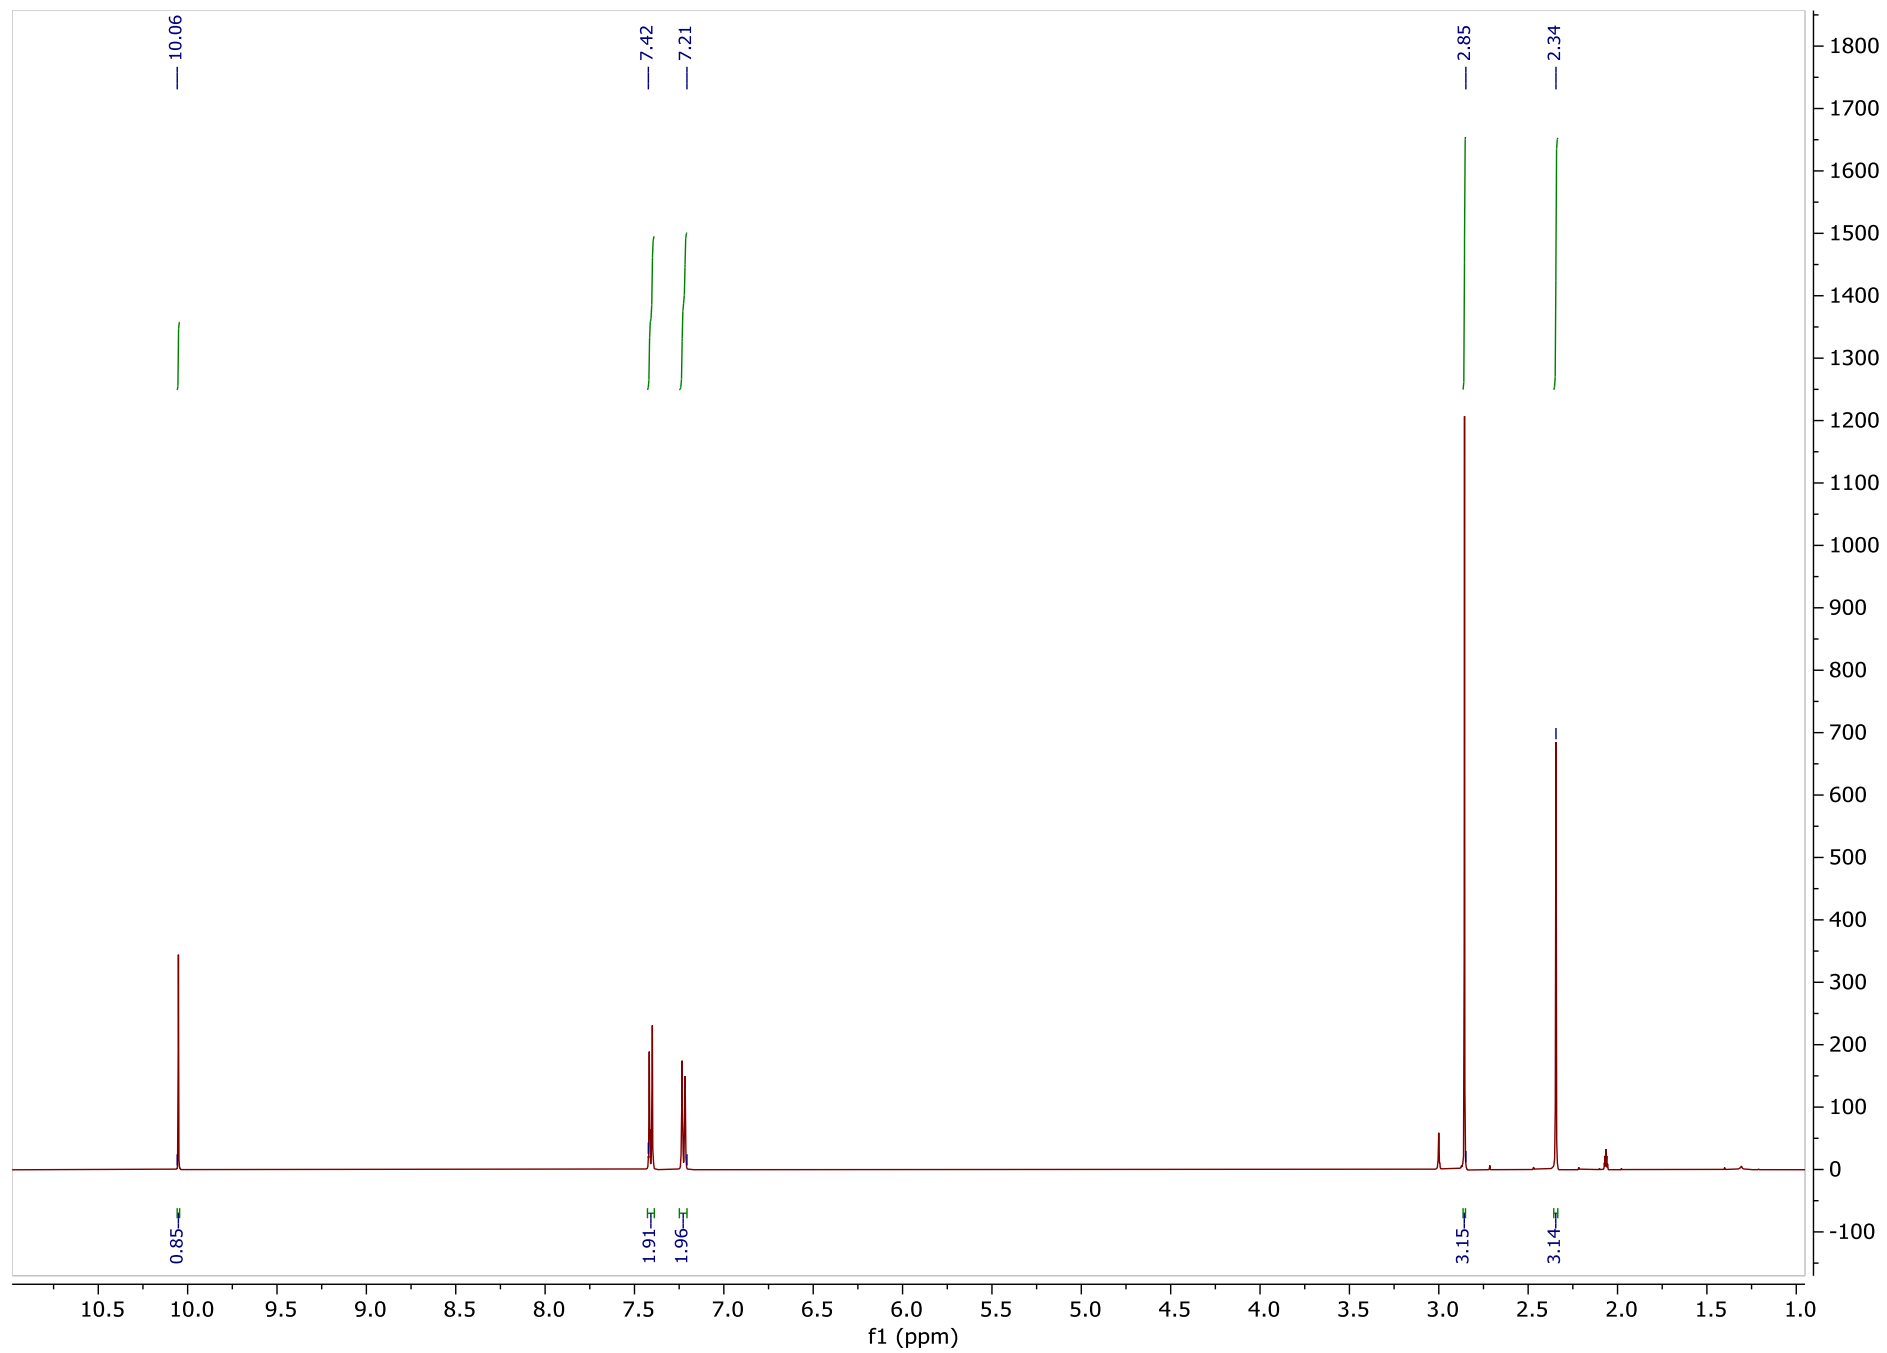



$^{13}\text{C}$  NMR of 3j, acetone, 126 MHz

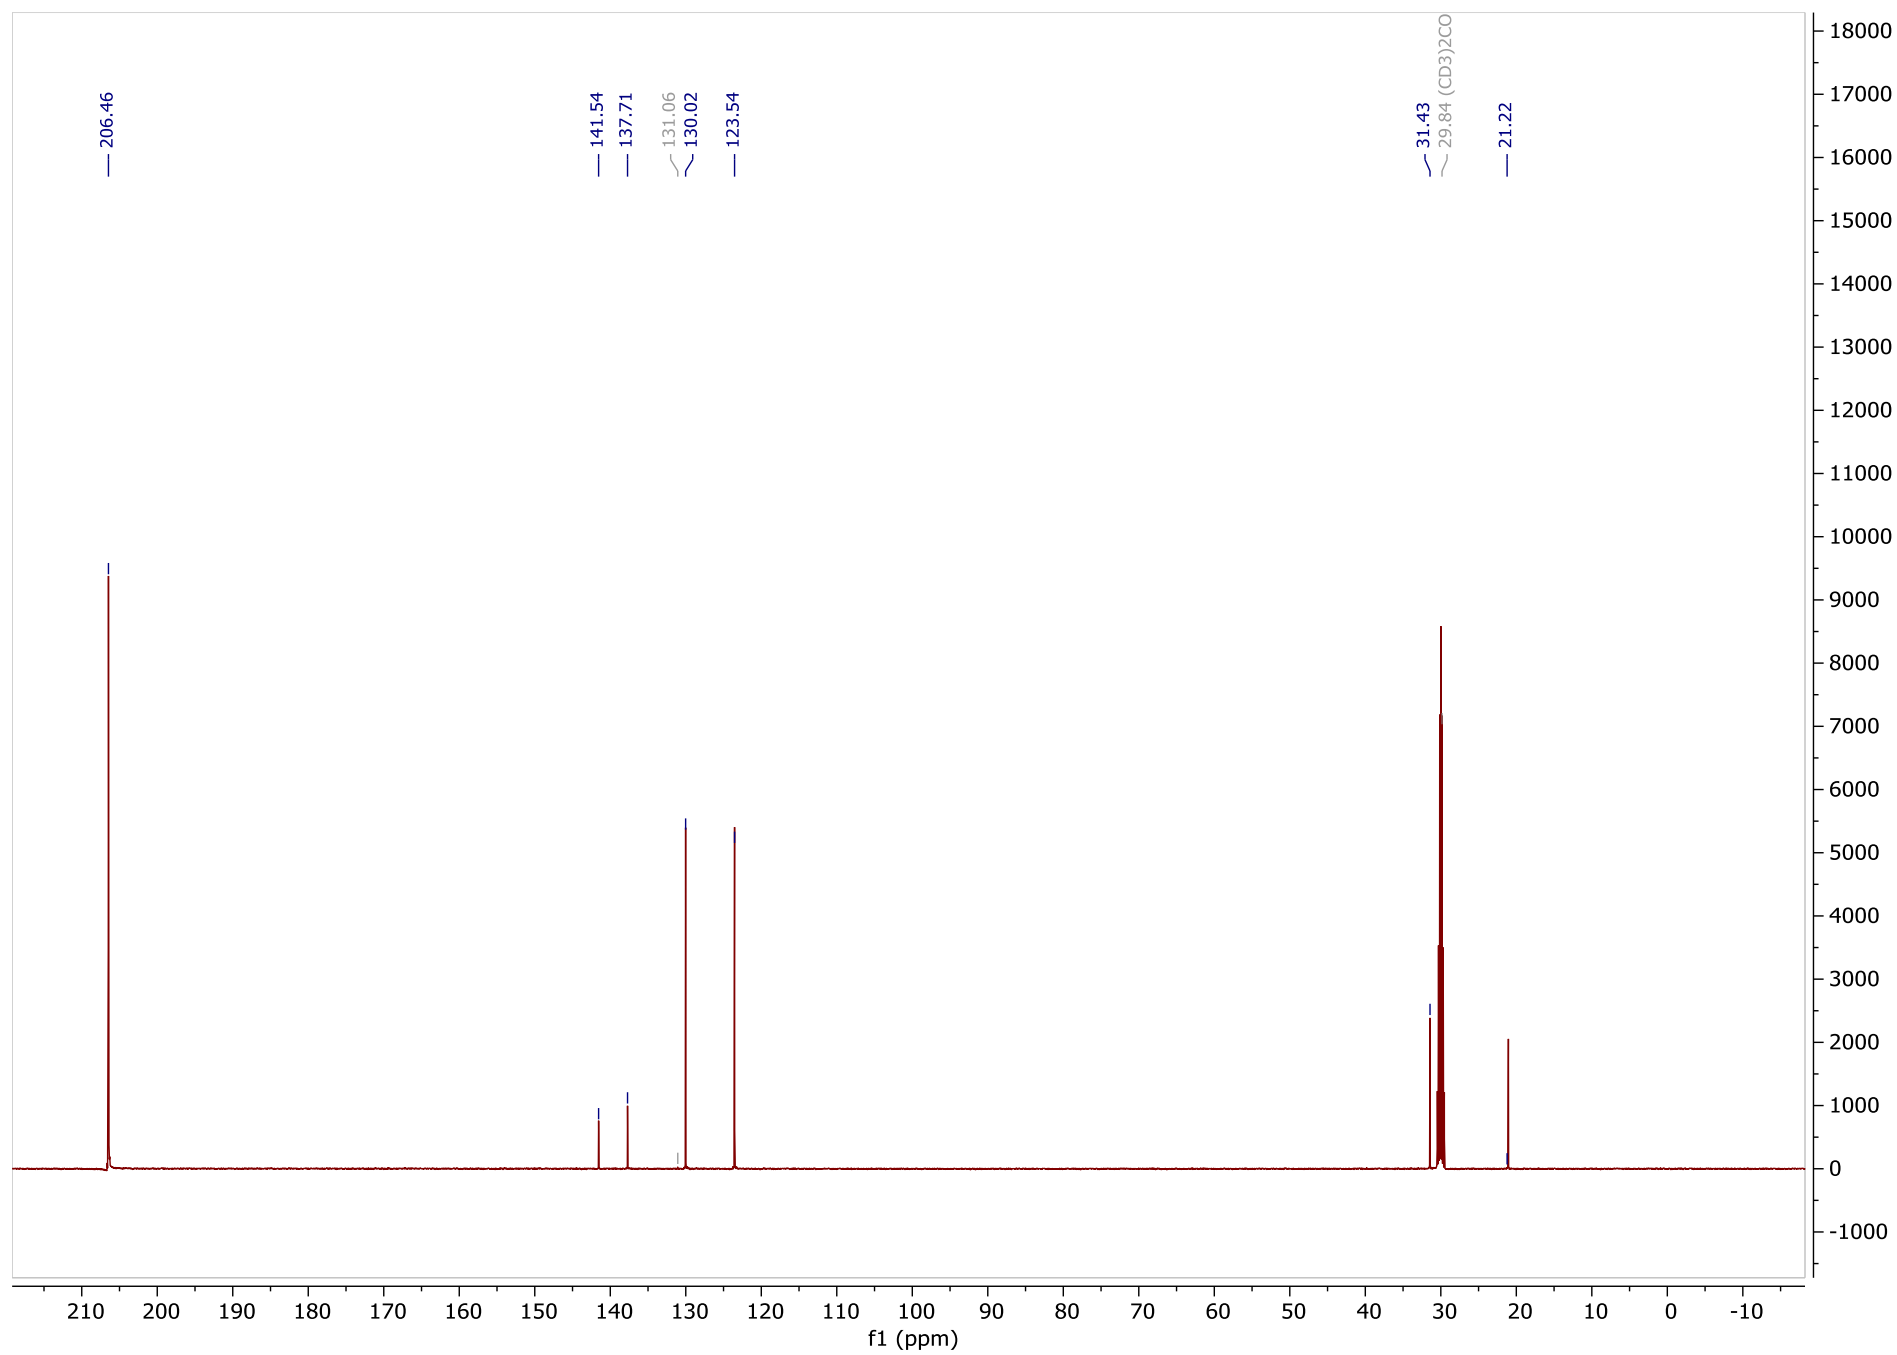

<sup>1</sup>H NMR of 3k, acetone, 500 MHz

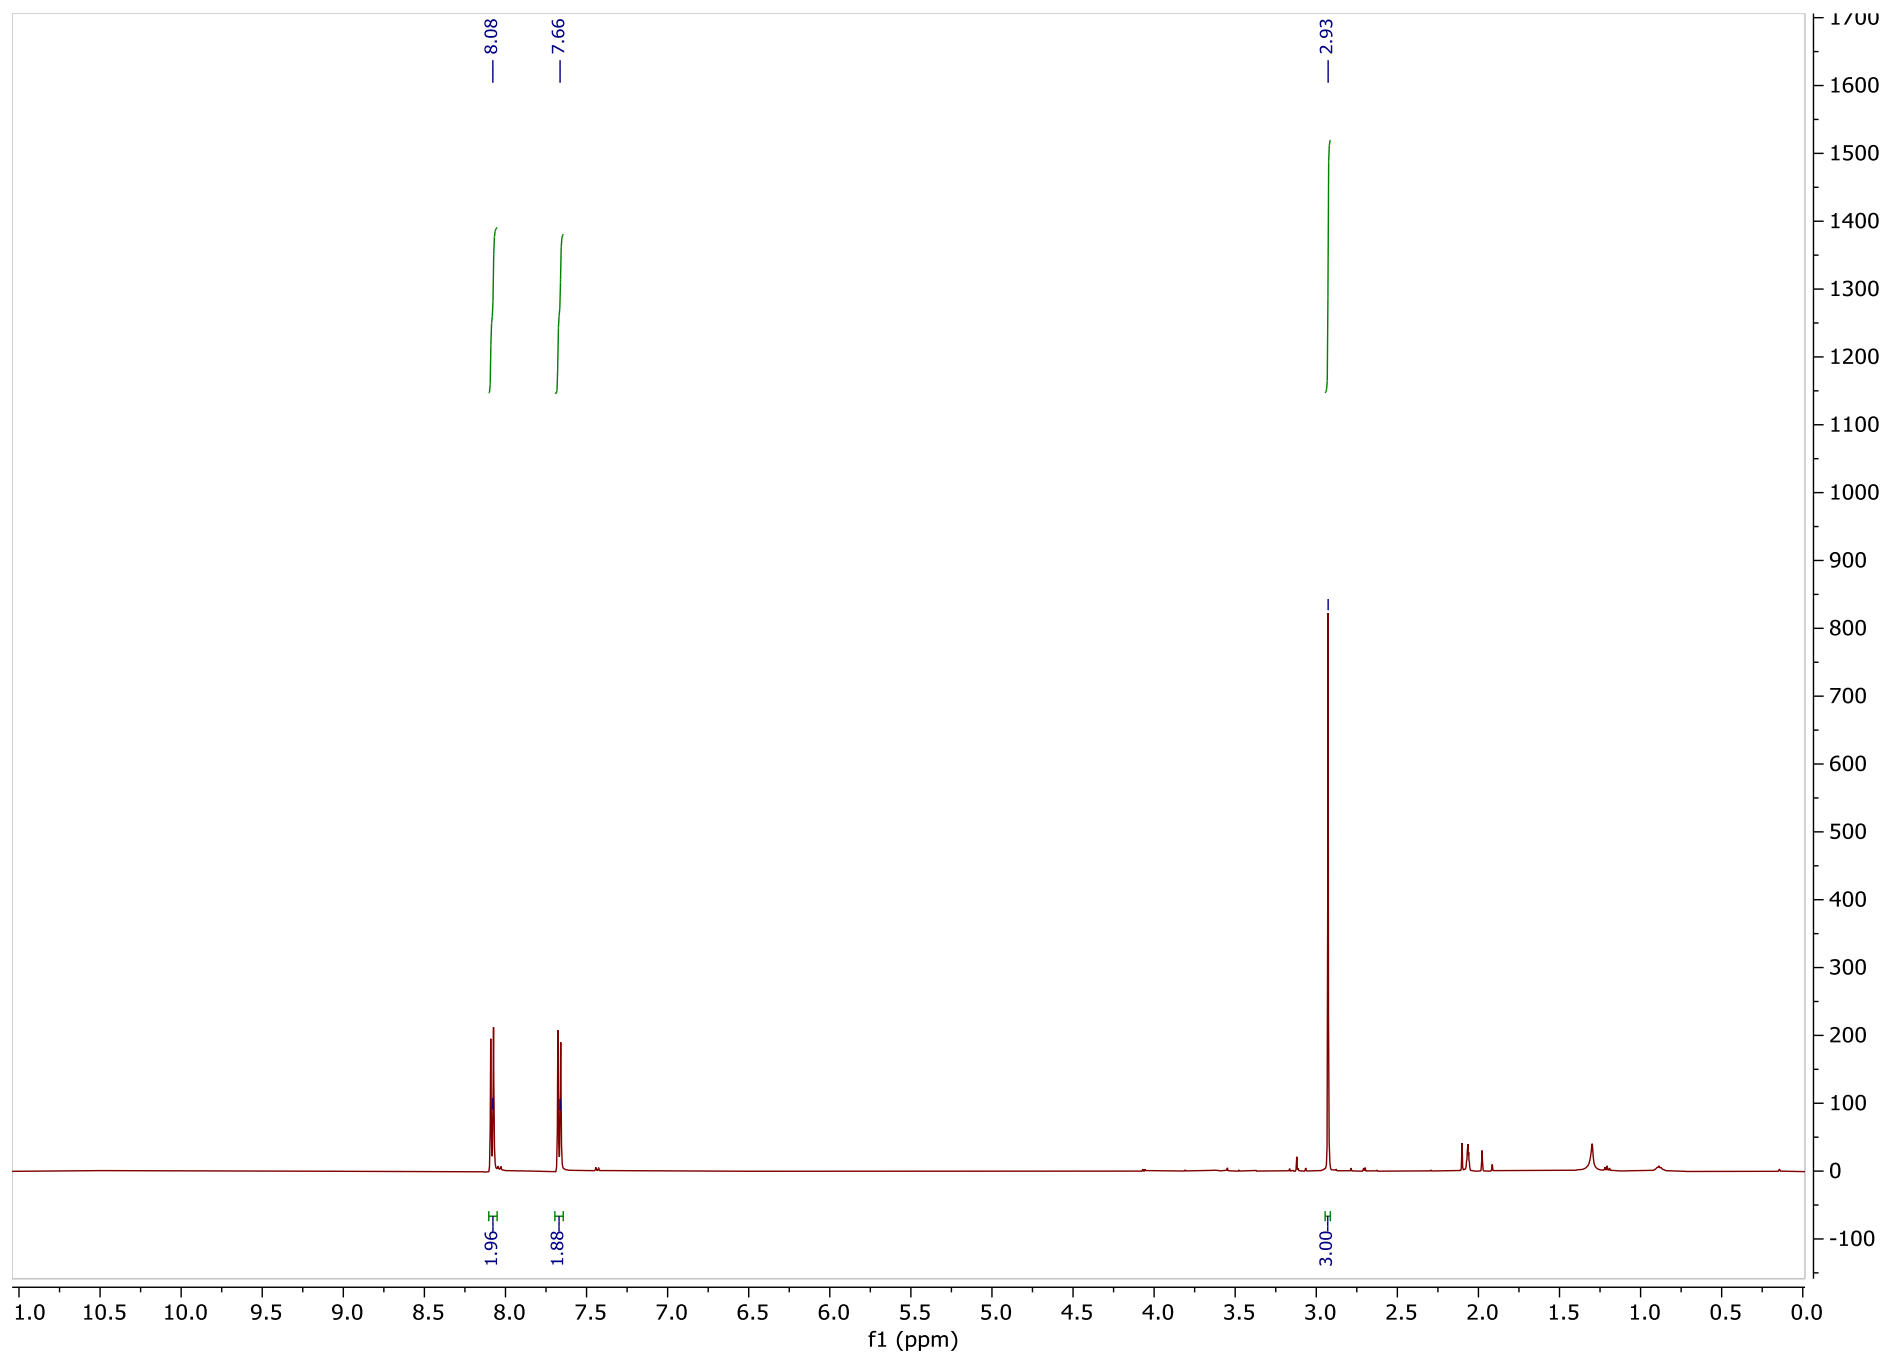

$^{13}\text{C}$  NMR of 3k, acetone, 126 MHz

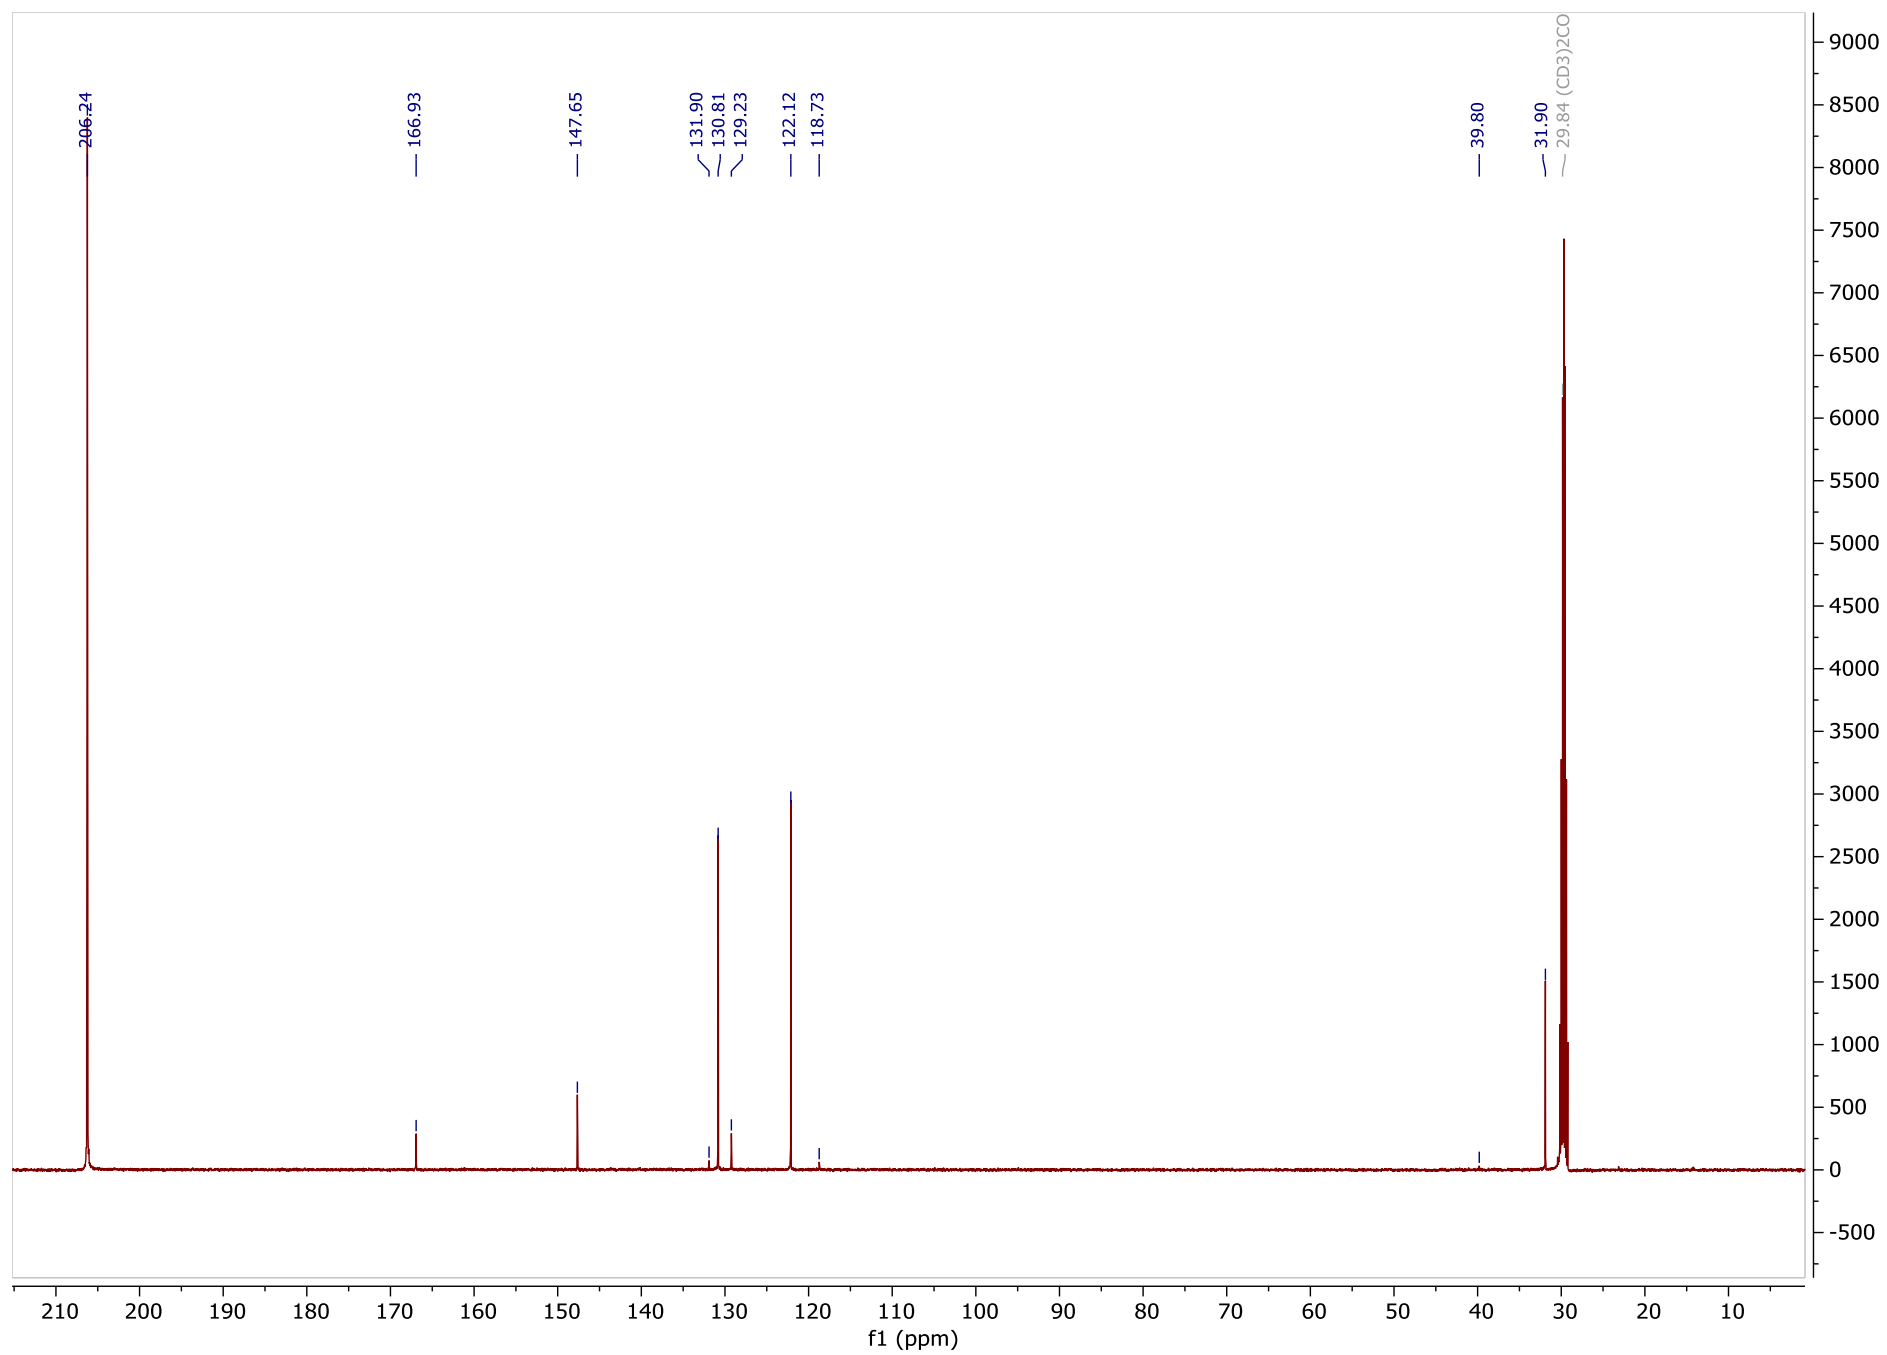

<sup>1</sup>H NMR of 3l, acetone, 500 MHz

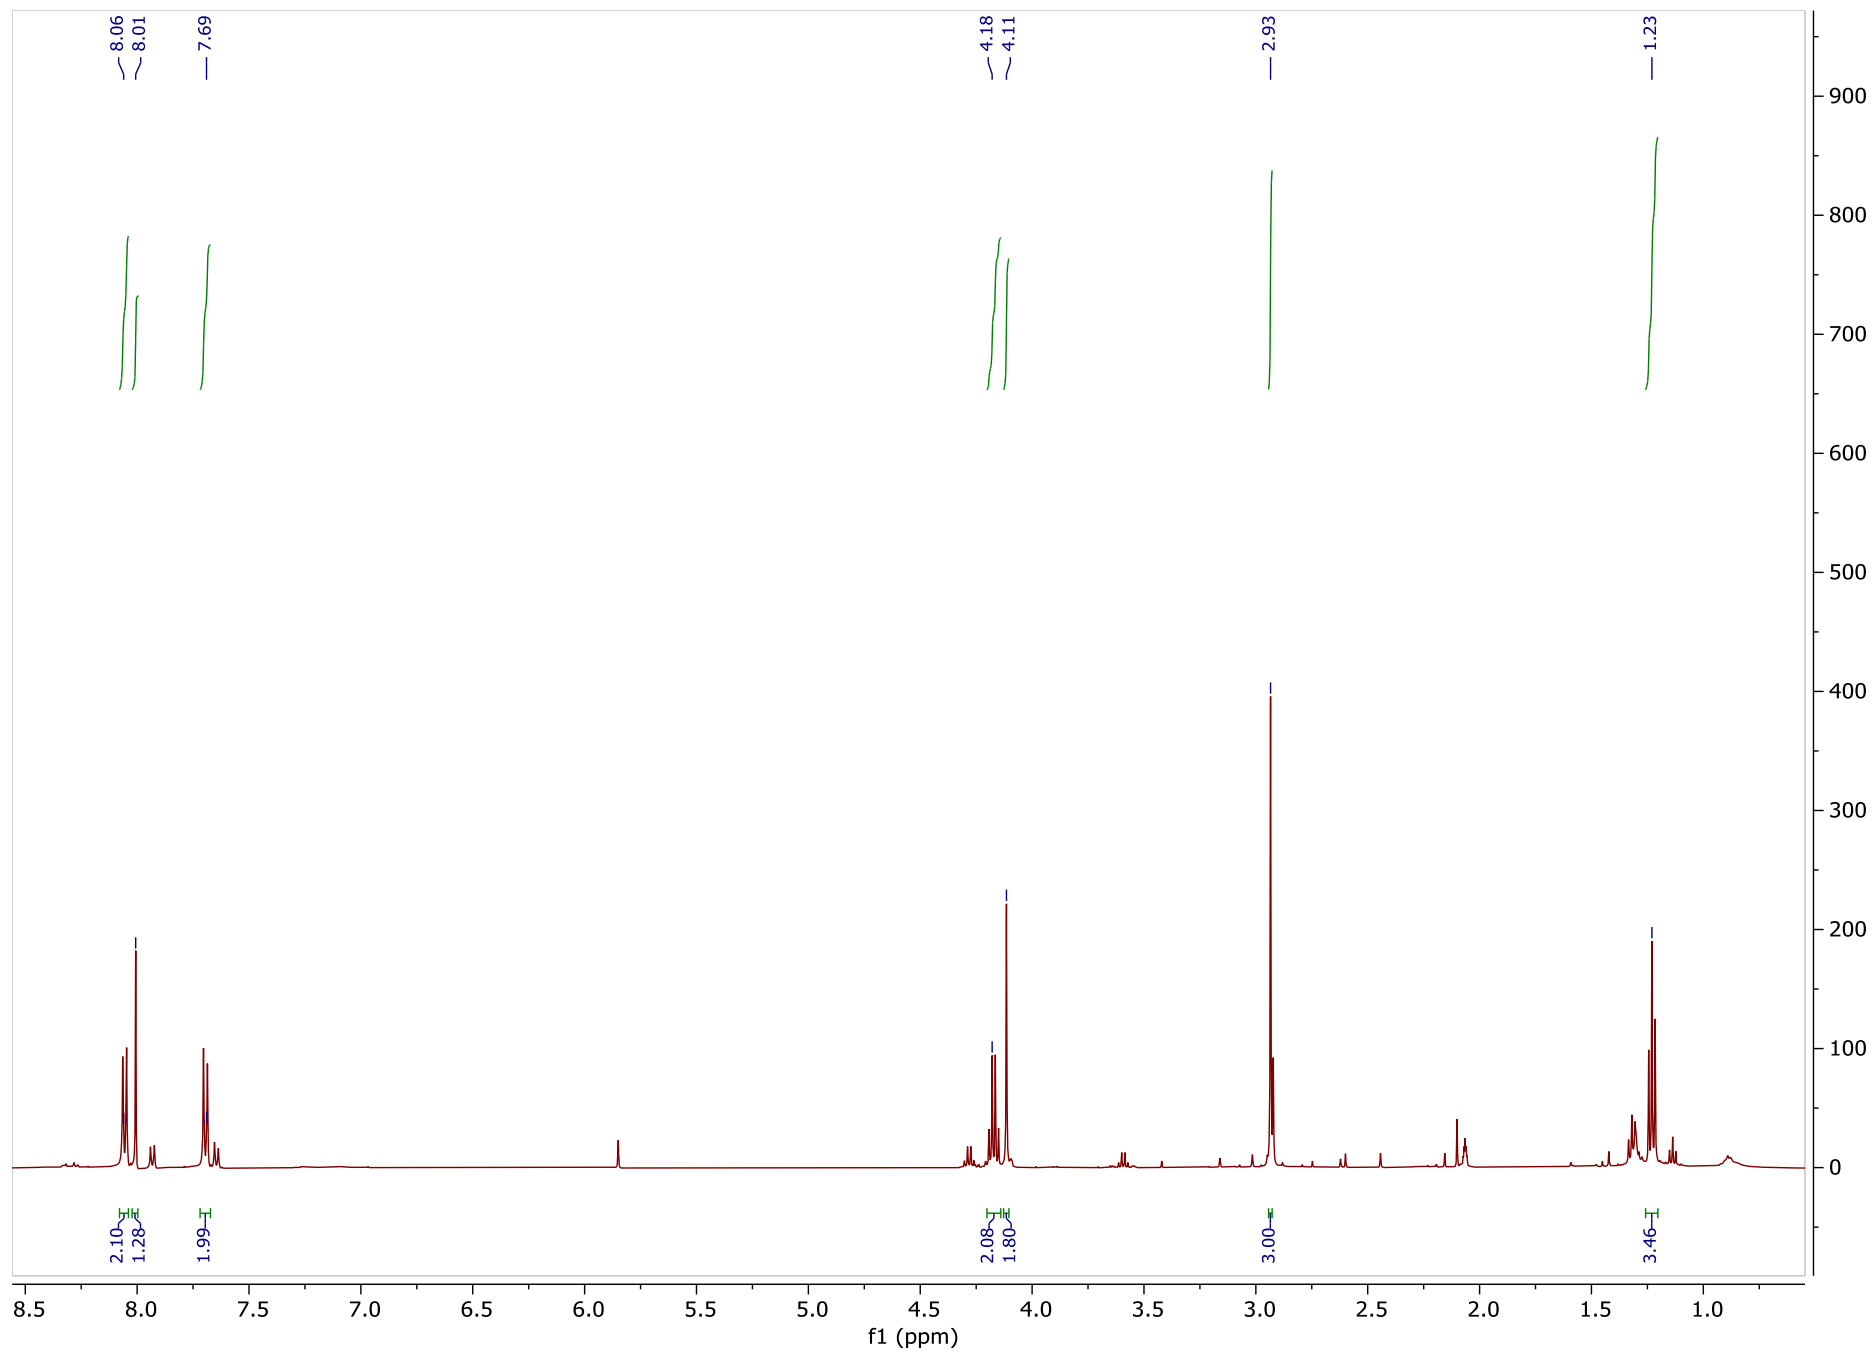

<sup>13</sup>C NMR of 3l, acetone, 126 MHz

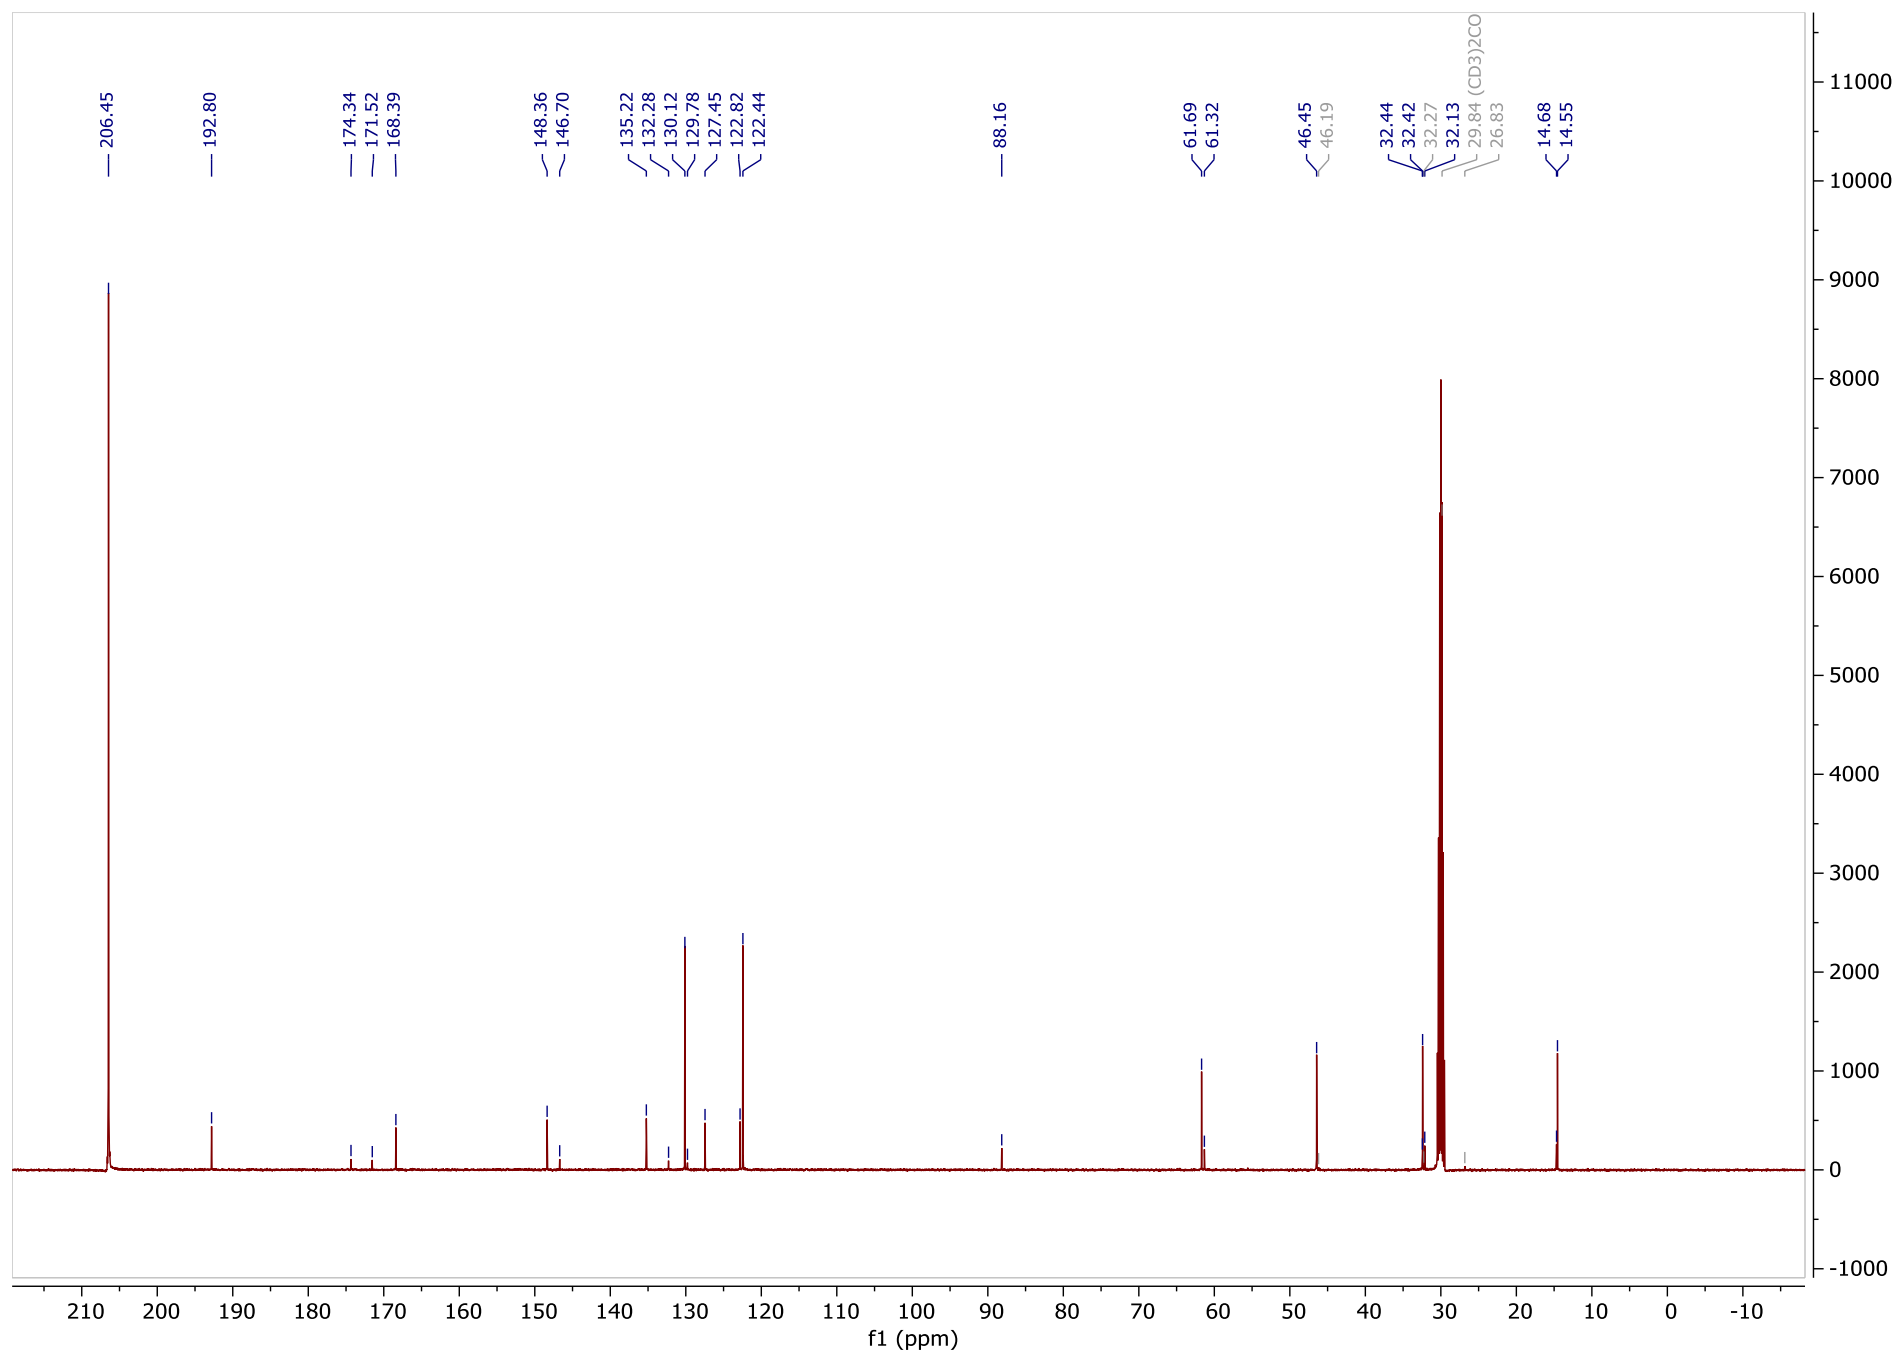

$^1\text{H}$  NMR of 3m, acetone, 500 MHz

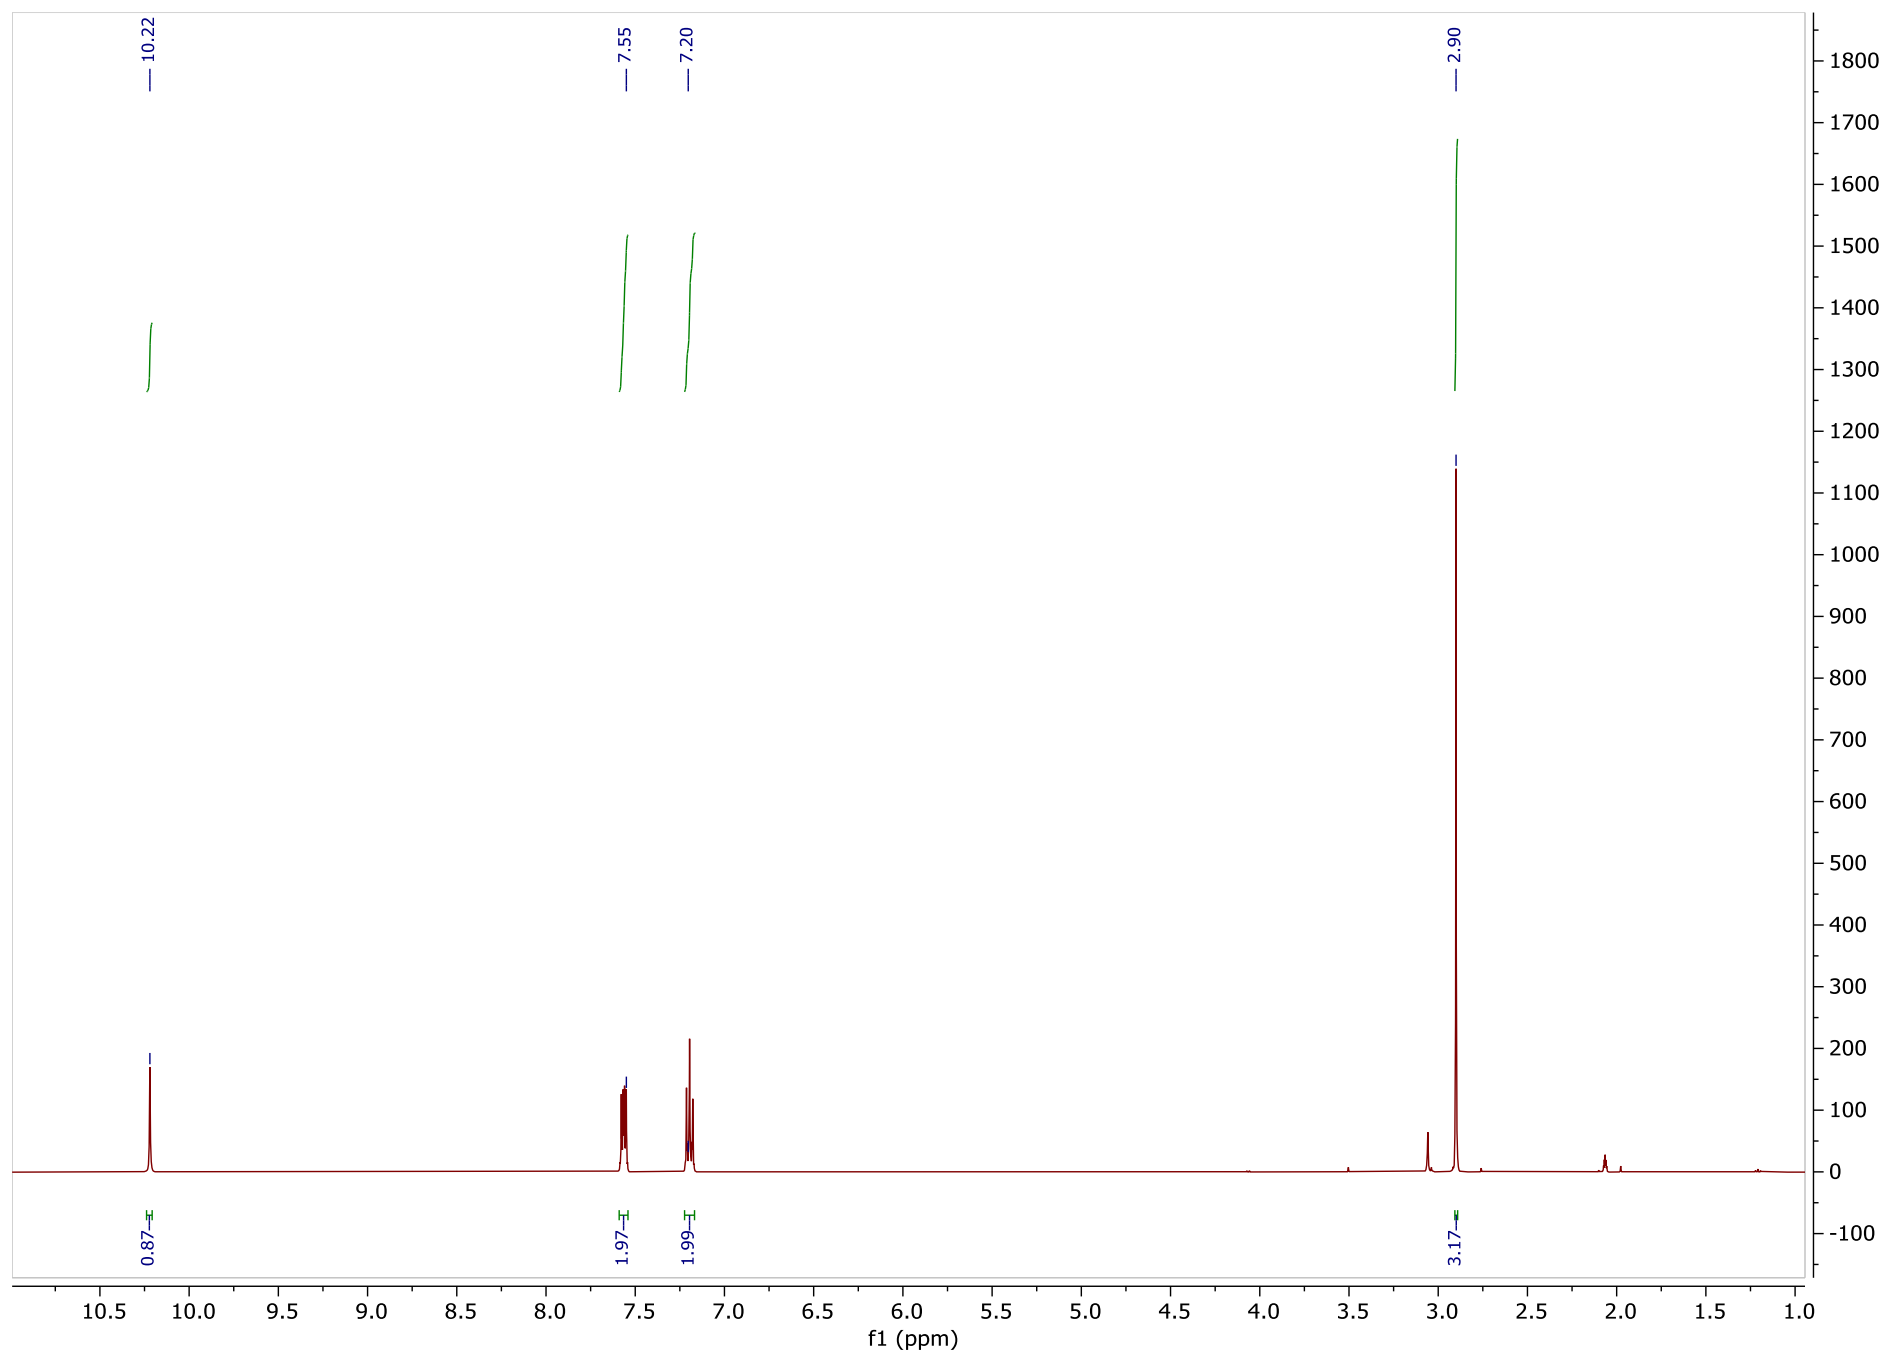

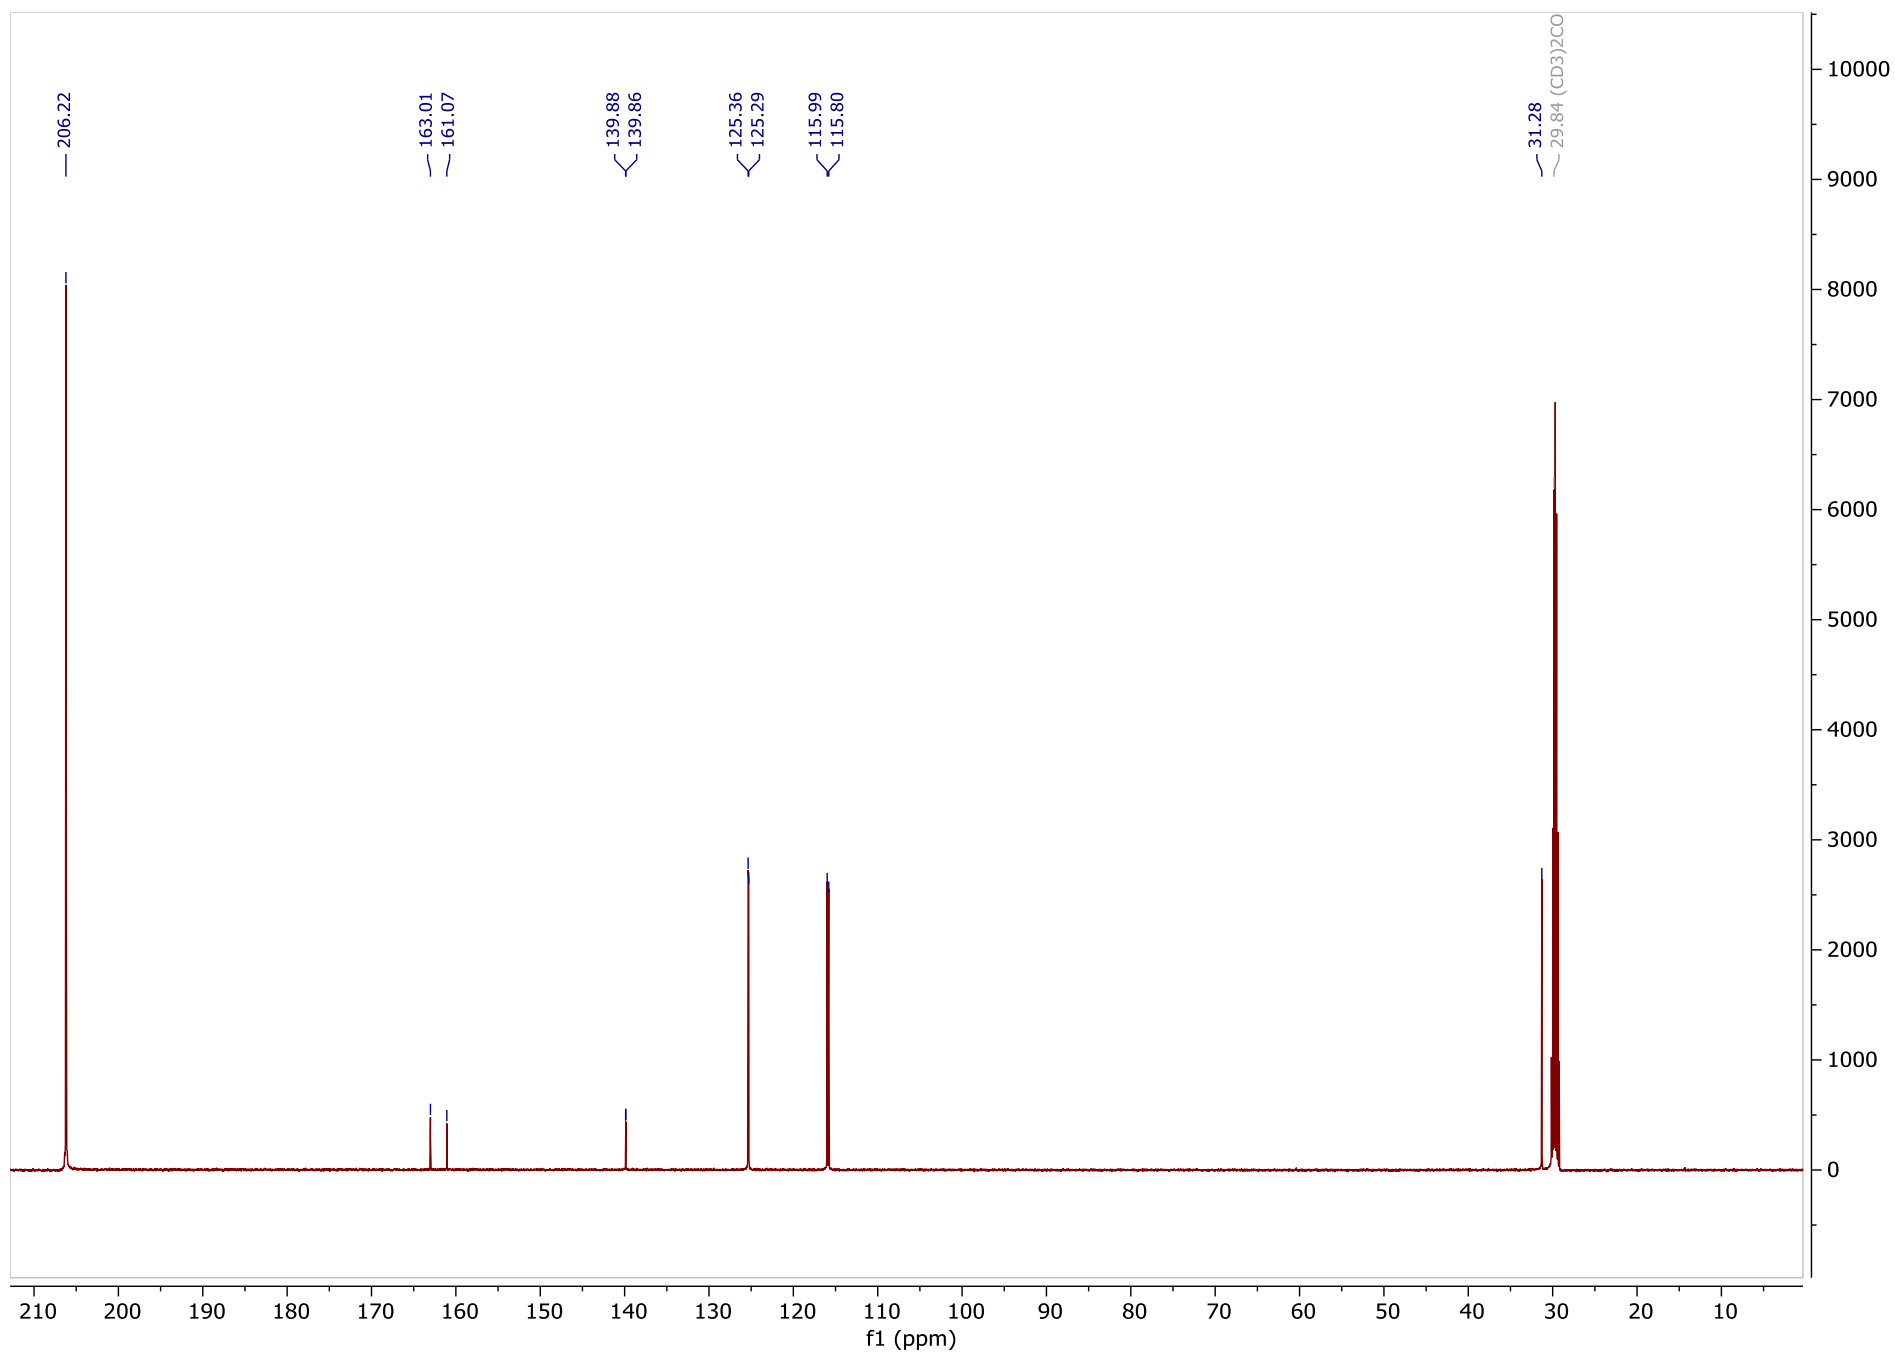

$^{19}\text{F}$  NMR of 3m, acetone, 471 MHz

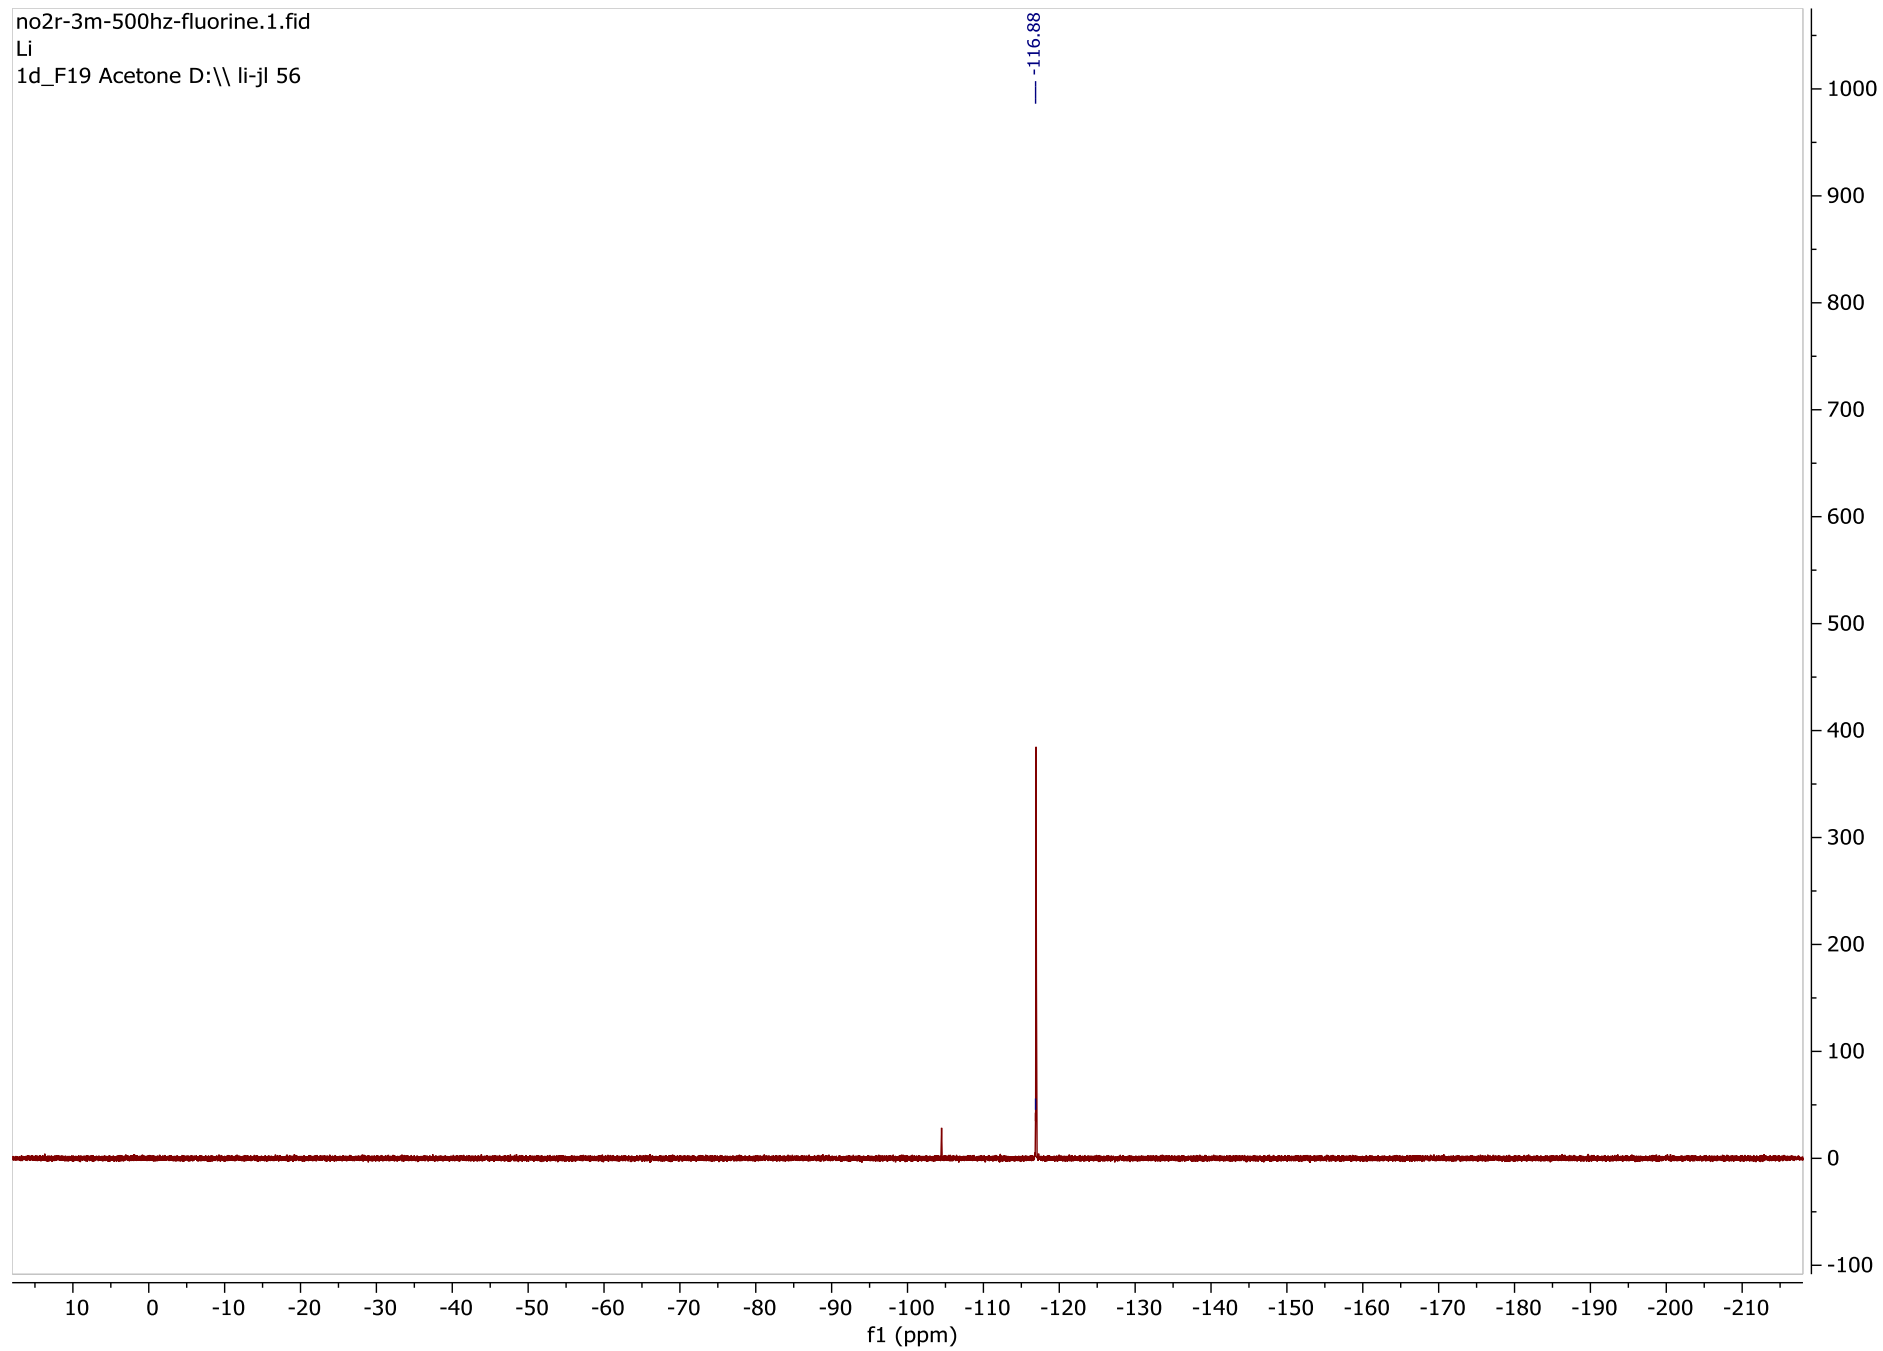



<sup>1</sup>H NMR of 3n, acetone, 500 MHz

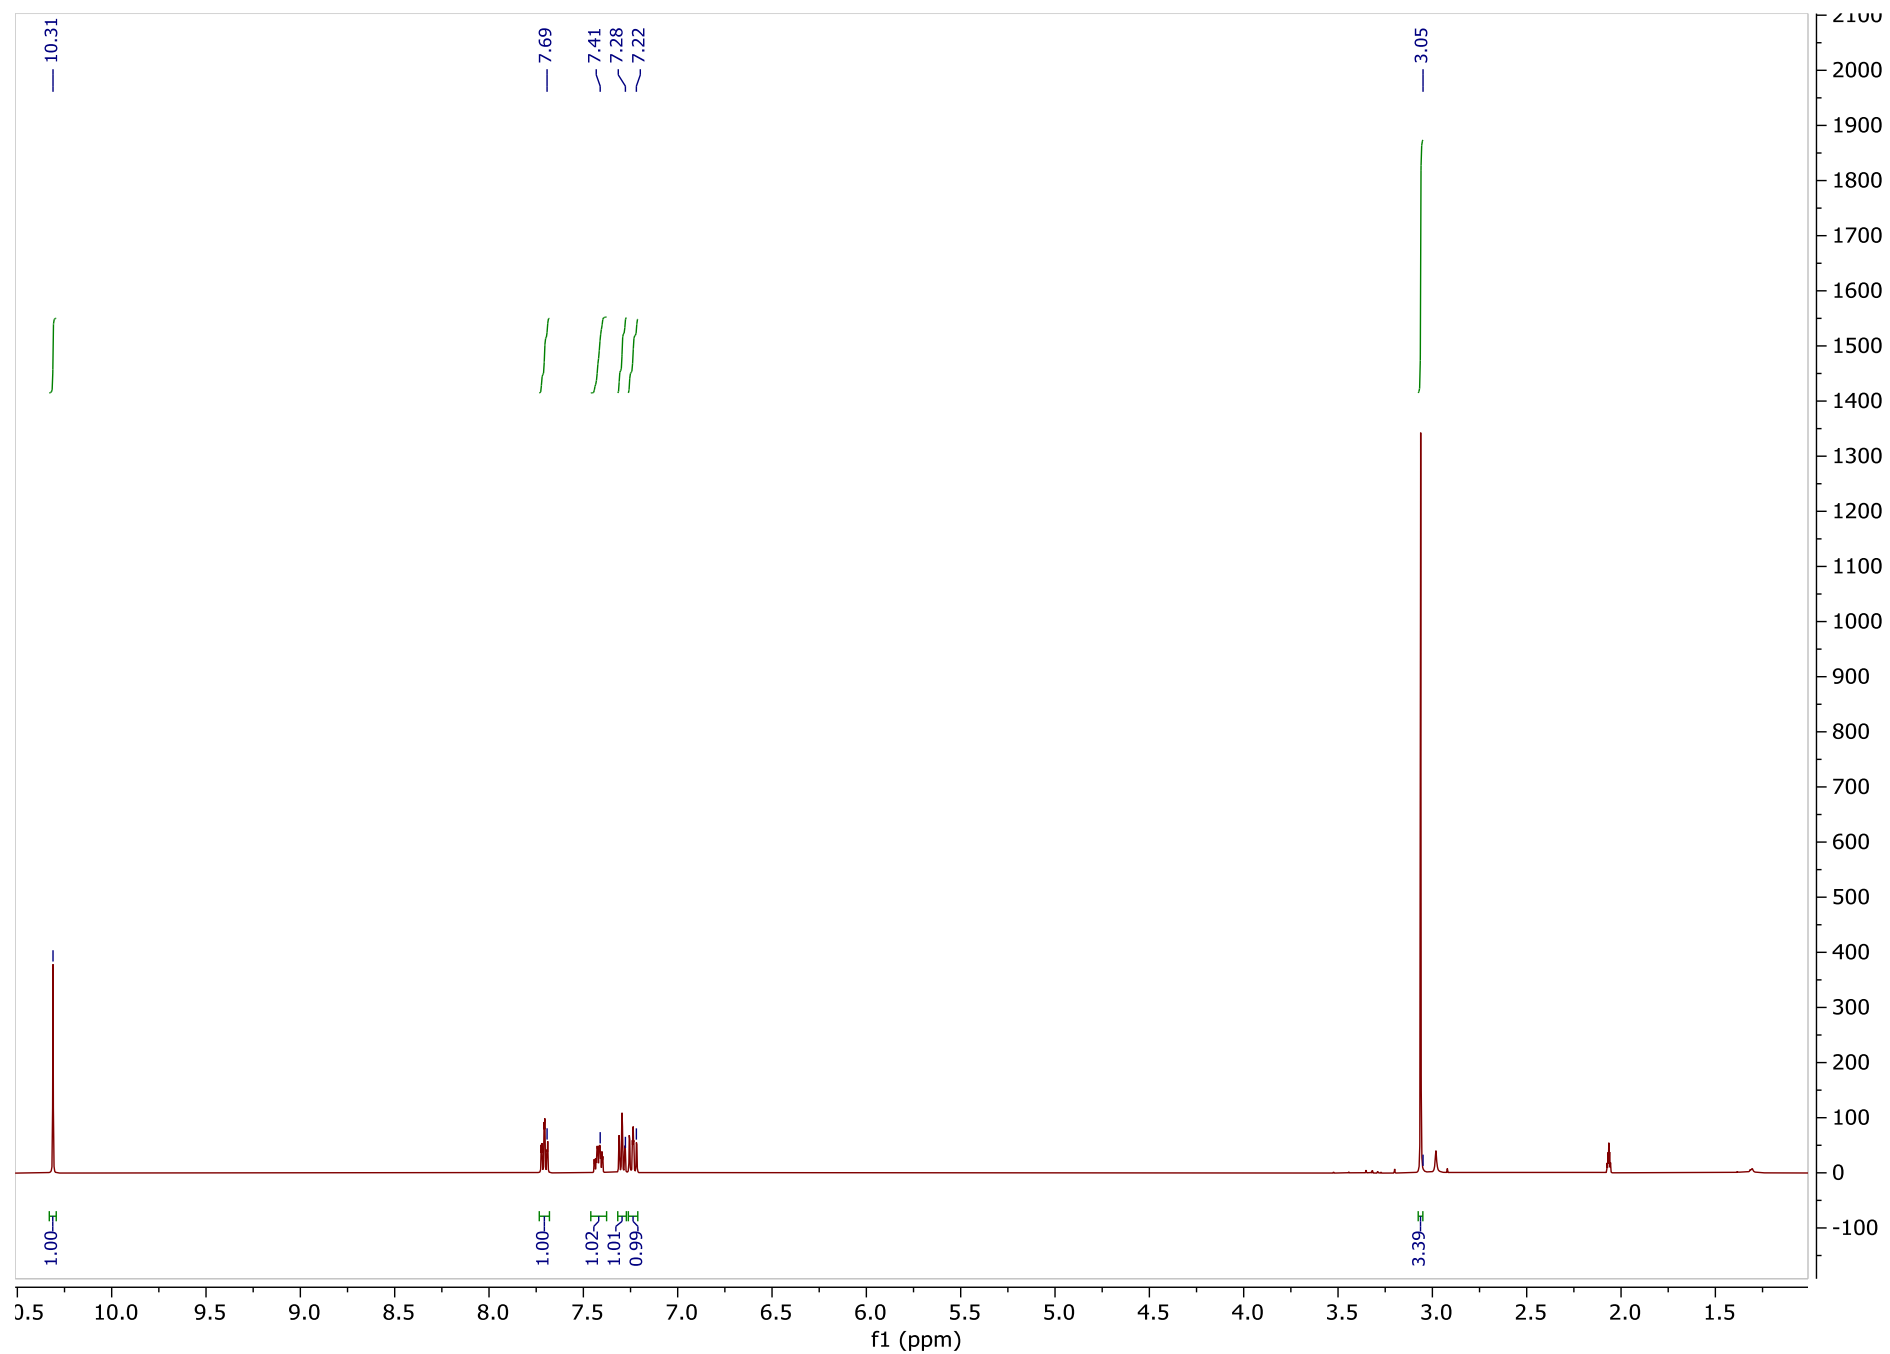

$^{13}\text{C}$  NMR of 3n, acetone, 126 MHz

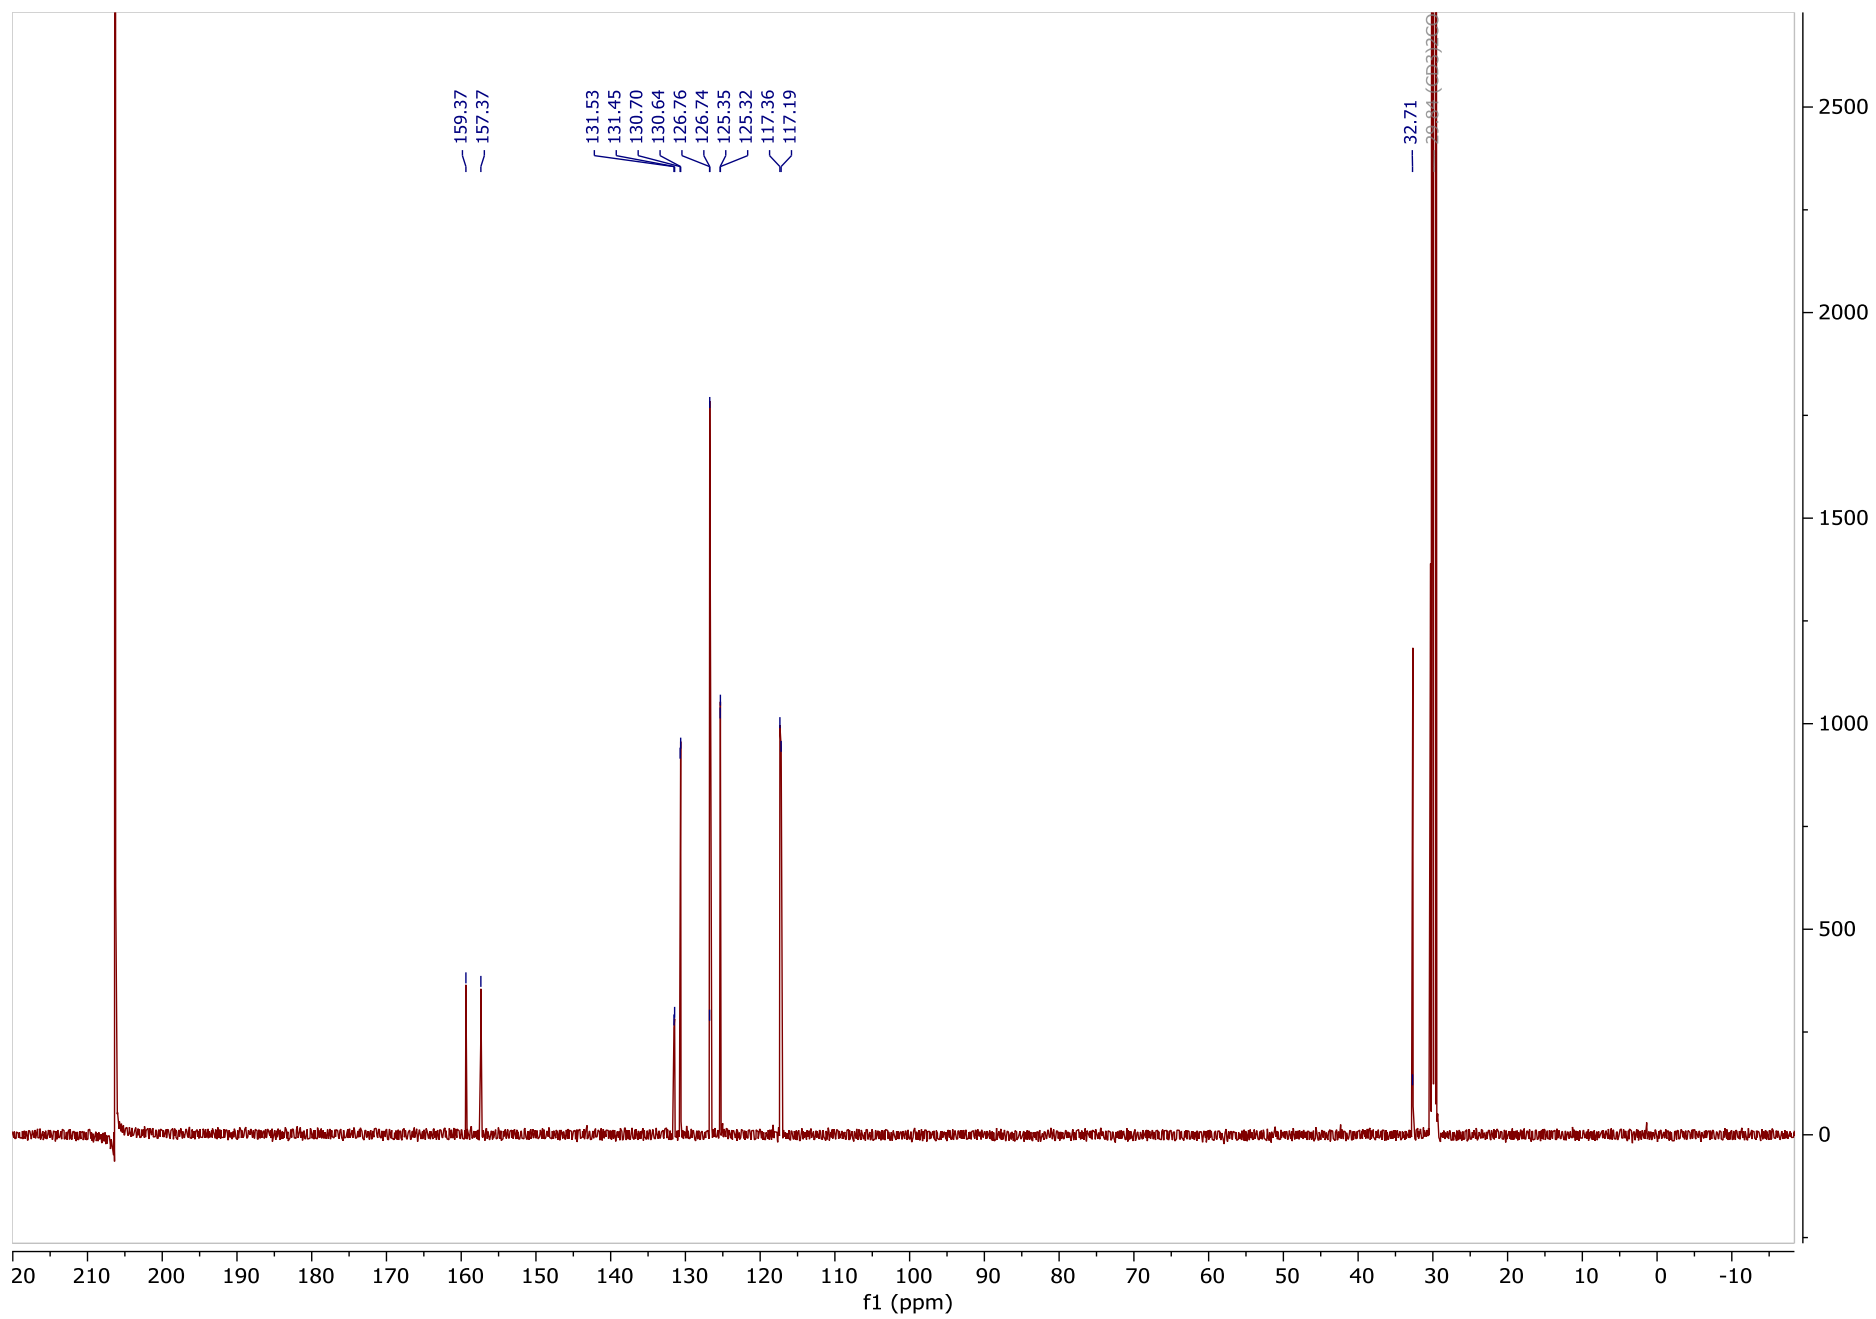

<sup>19</sup>F NMR of 3n, acetone, 471 MHz

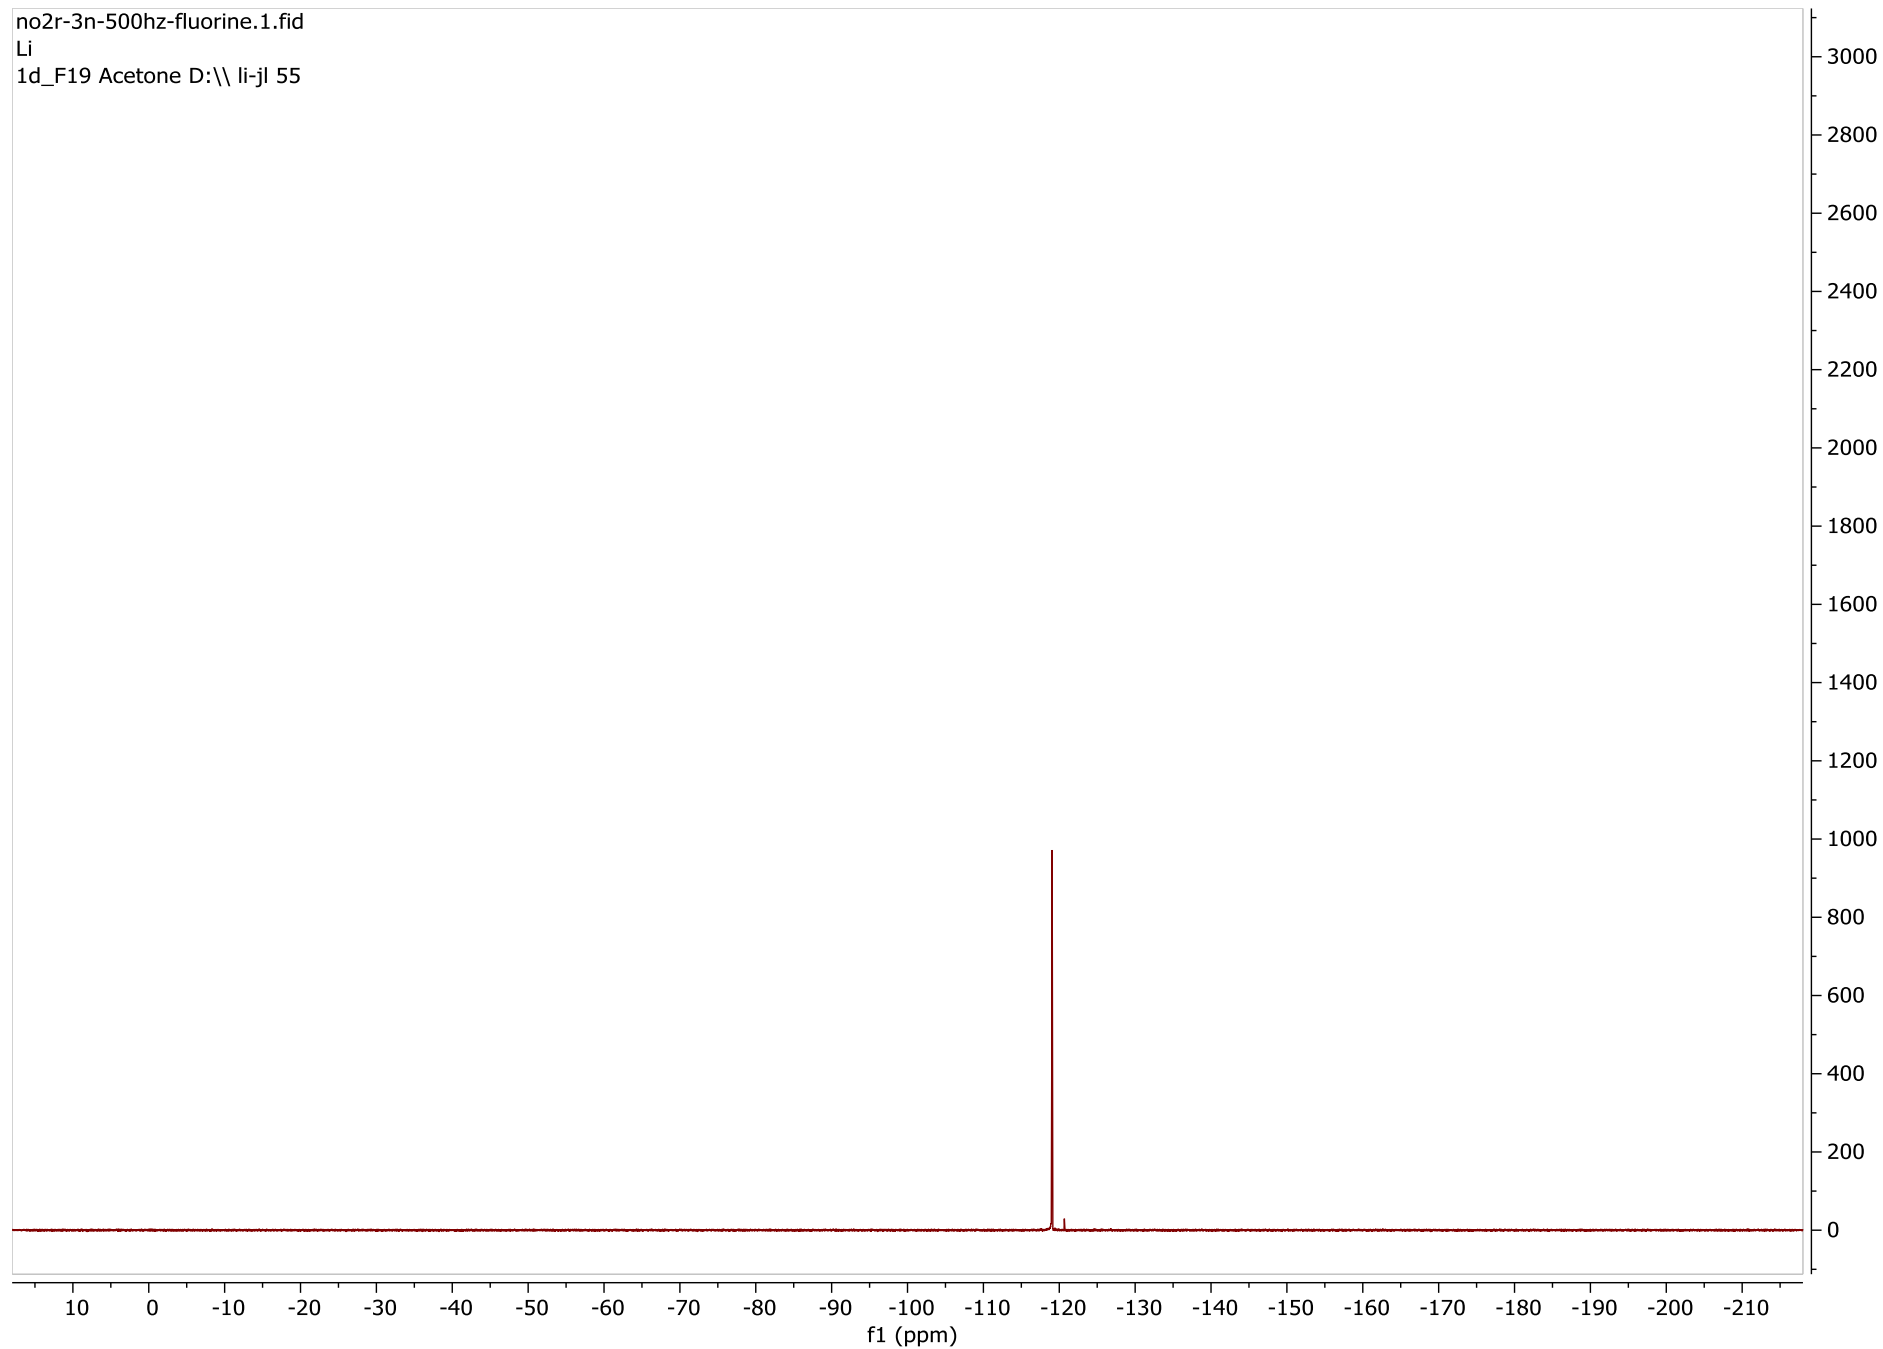

<sup>1</sup>H NMR of 3o, acetone, 500 MHz

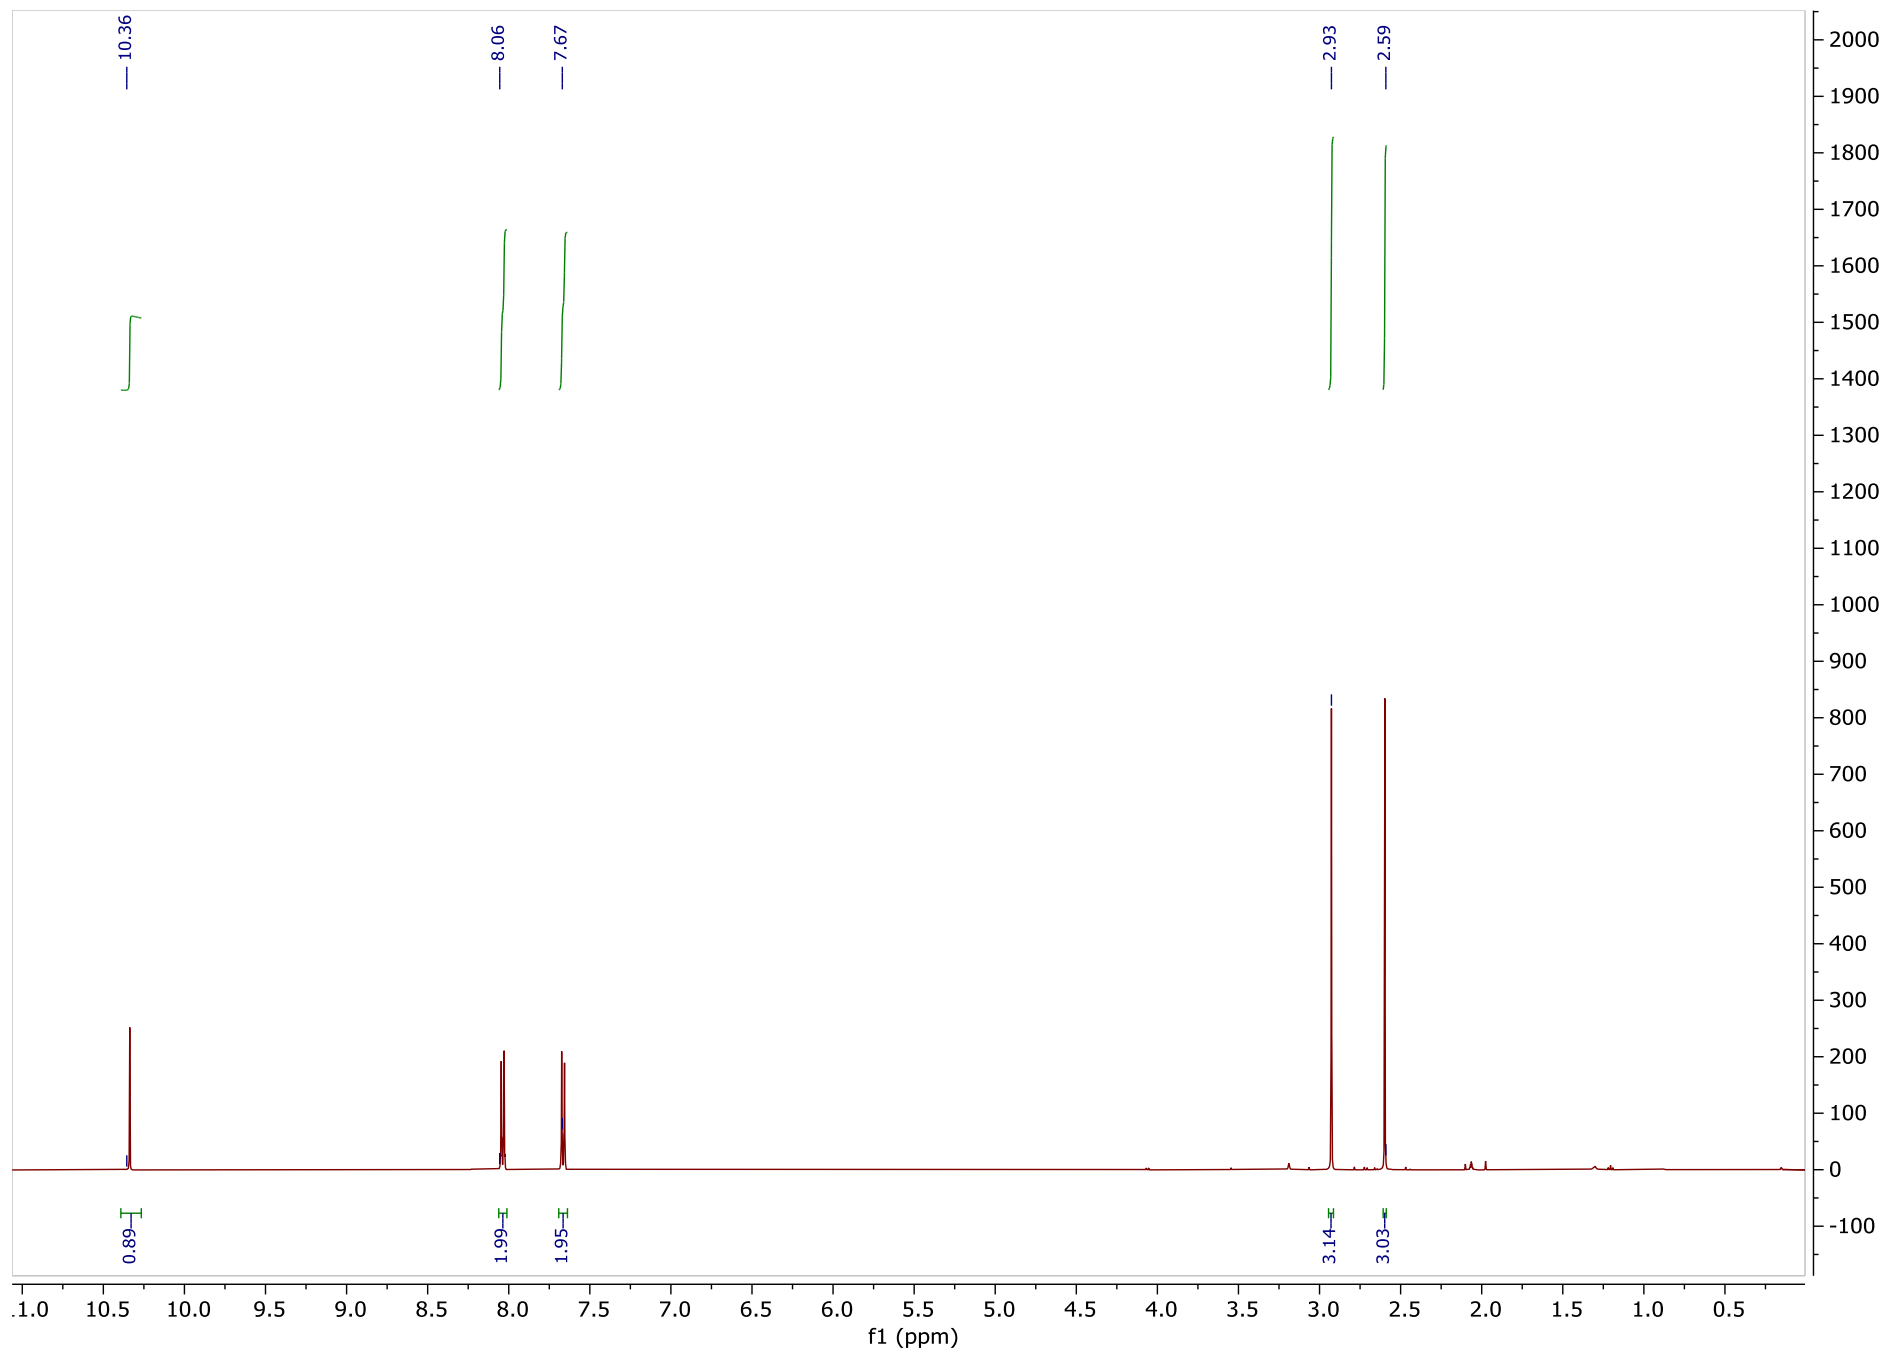

$^{13}\text{C}$  NMR of 3o, acetone, 126 MHz

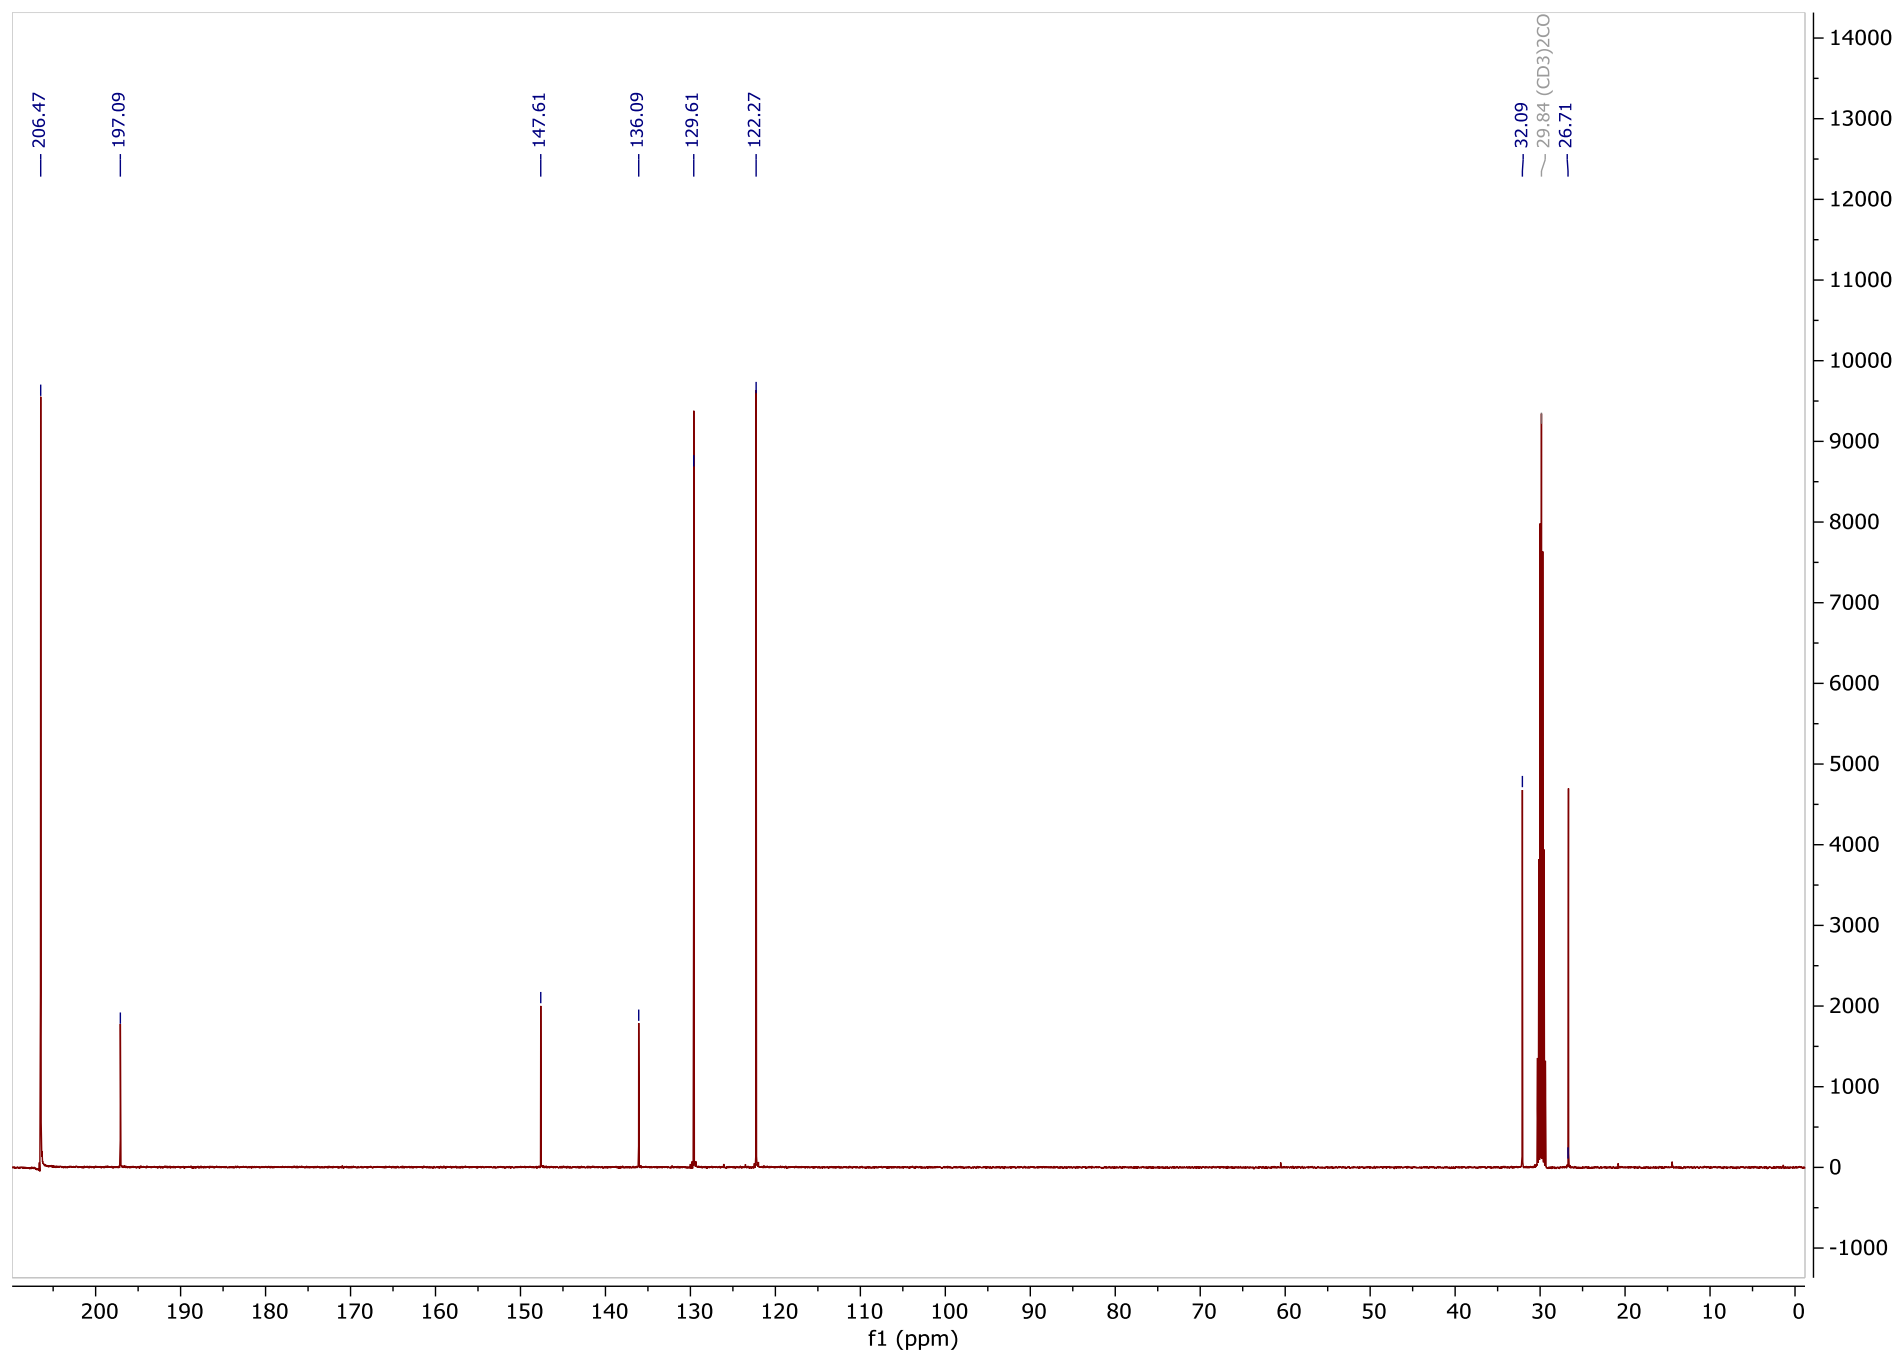

<sup>1</sup>H NMR of 3p, acetone, 500 MHz

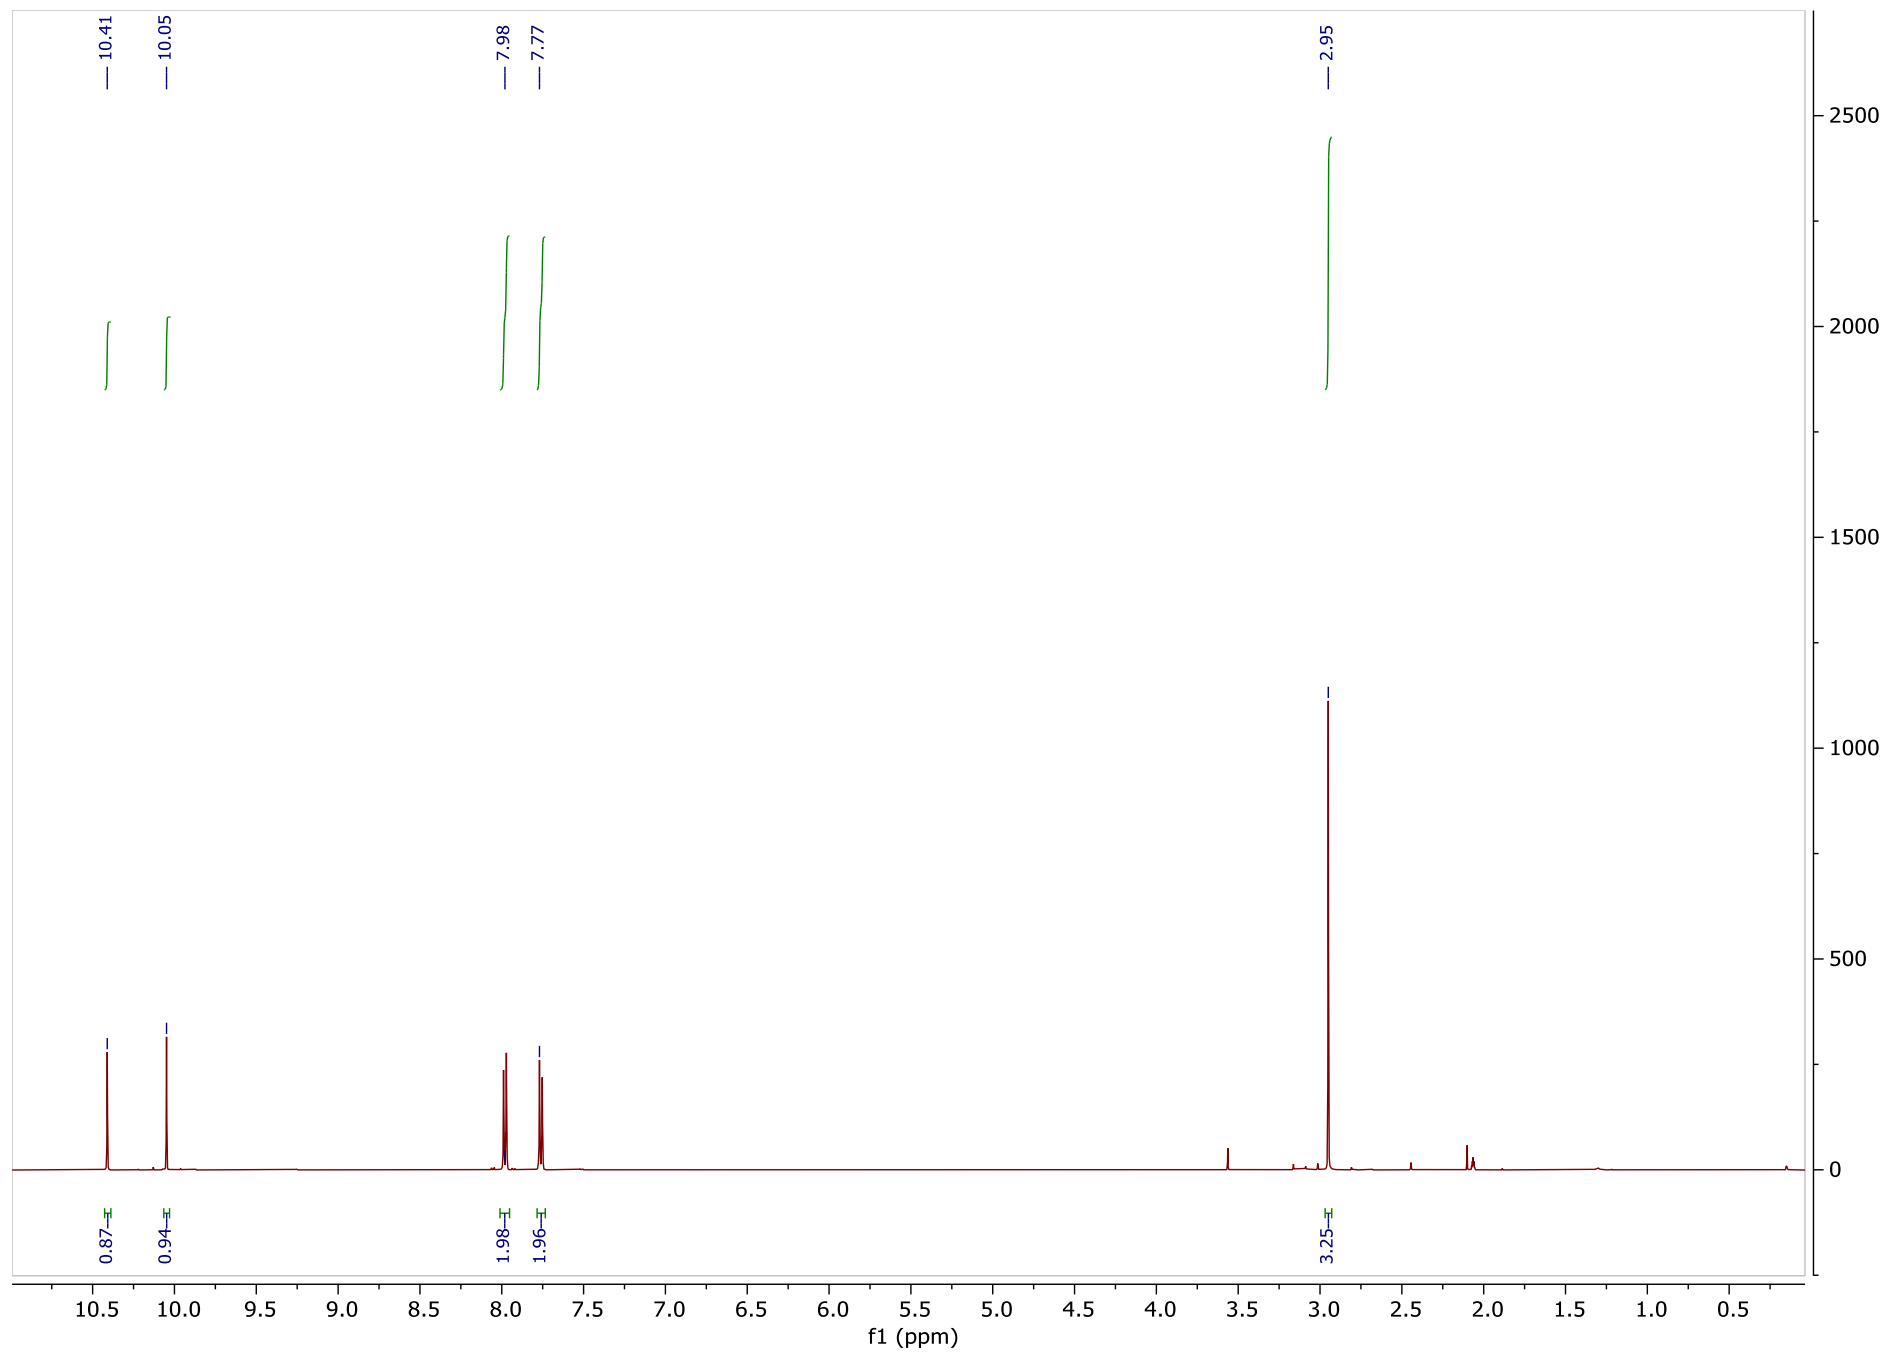

$^{13}\text{C}$  NMR of 3p, acetone, 126 MHz

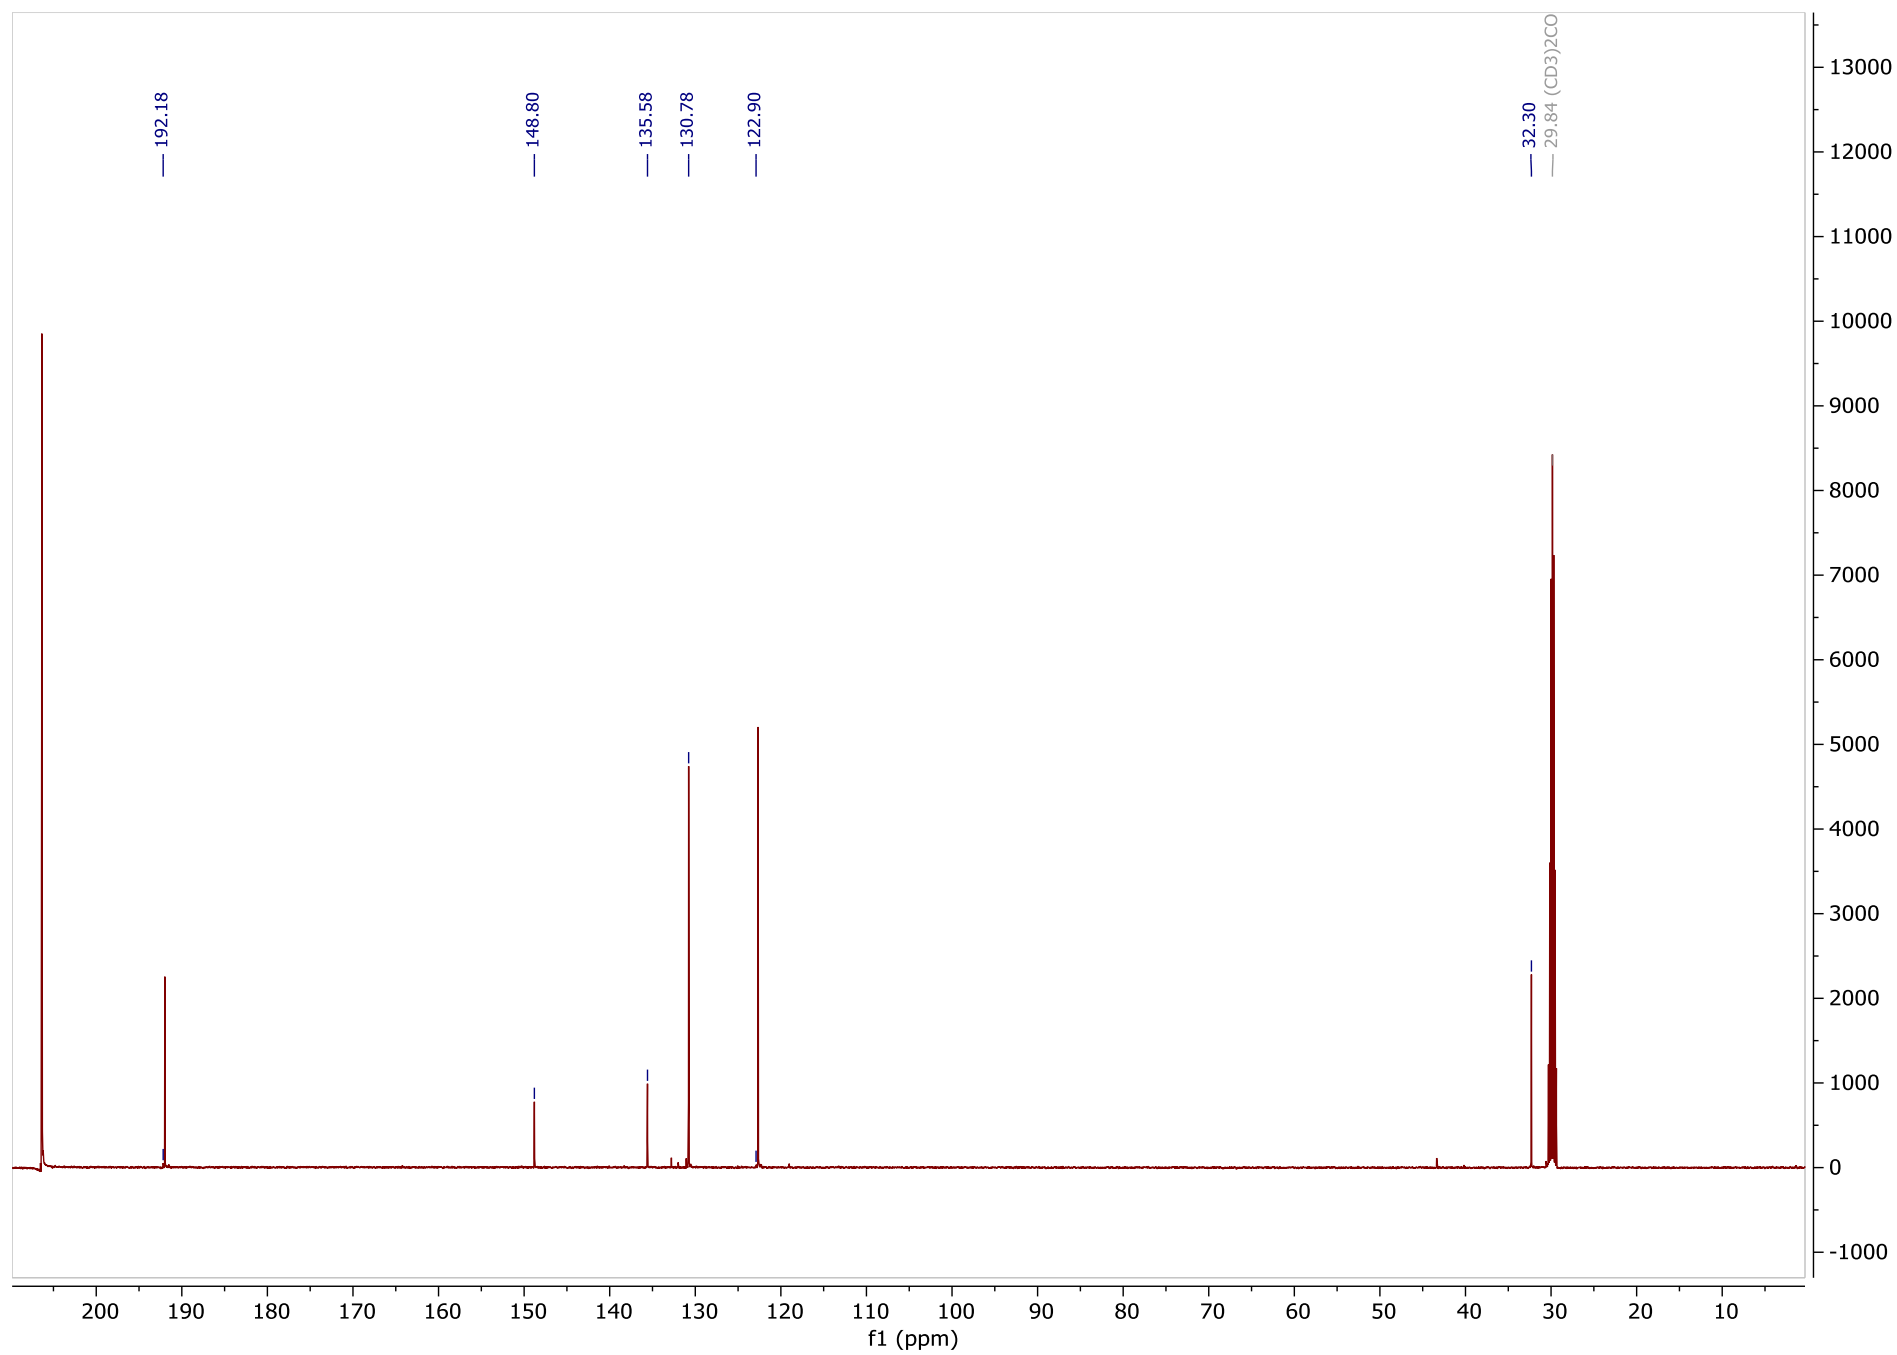

<sup>1</sup>H NMR of 3q, acetone, 500 MHz

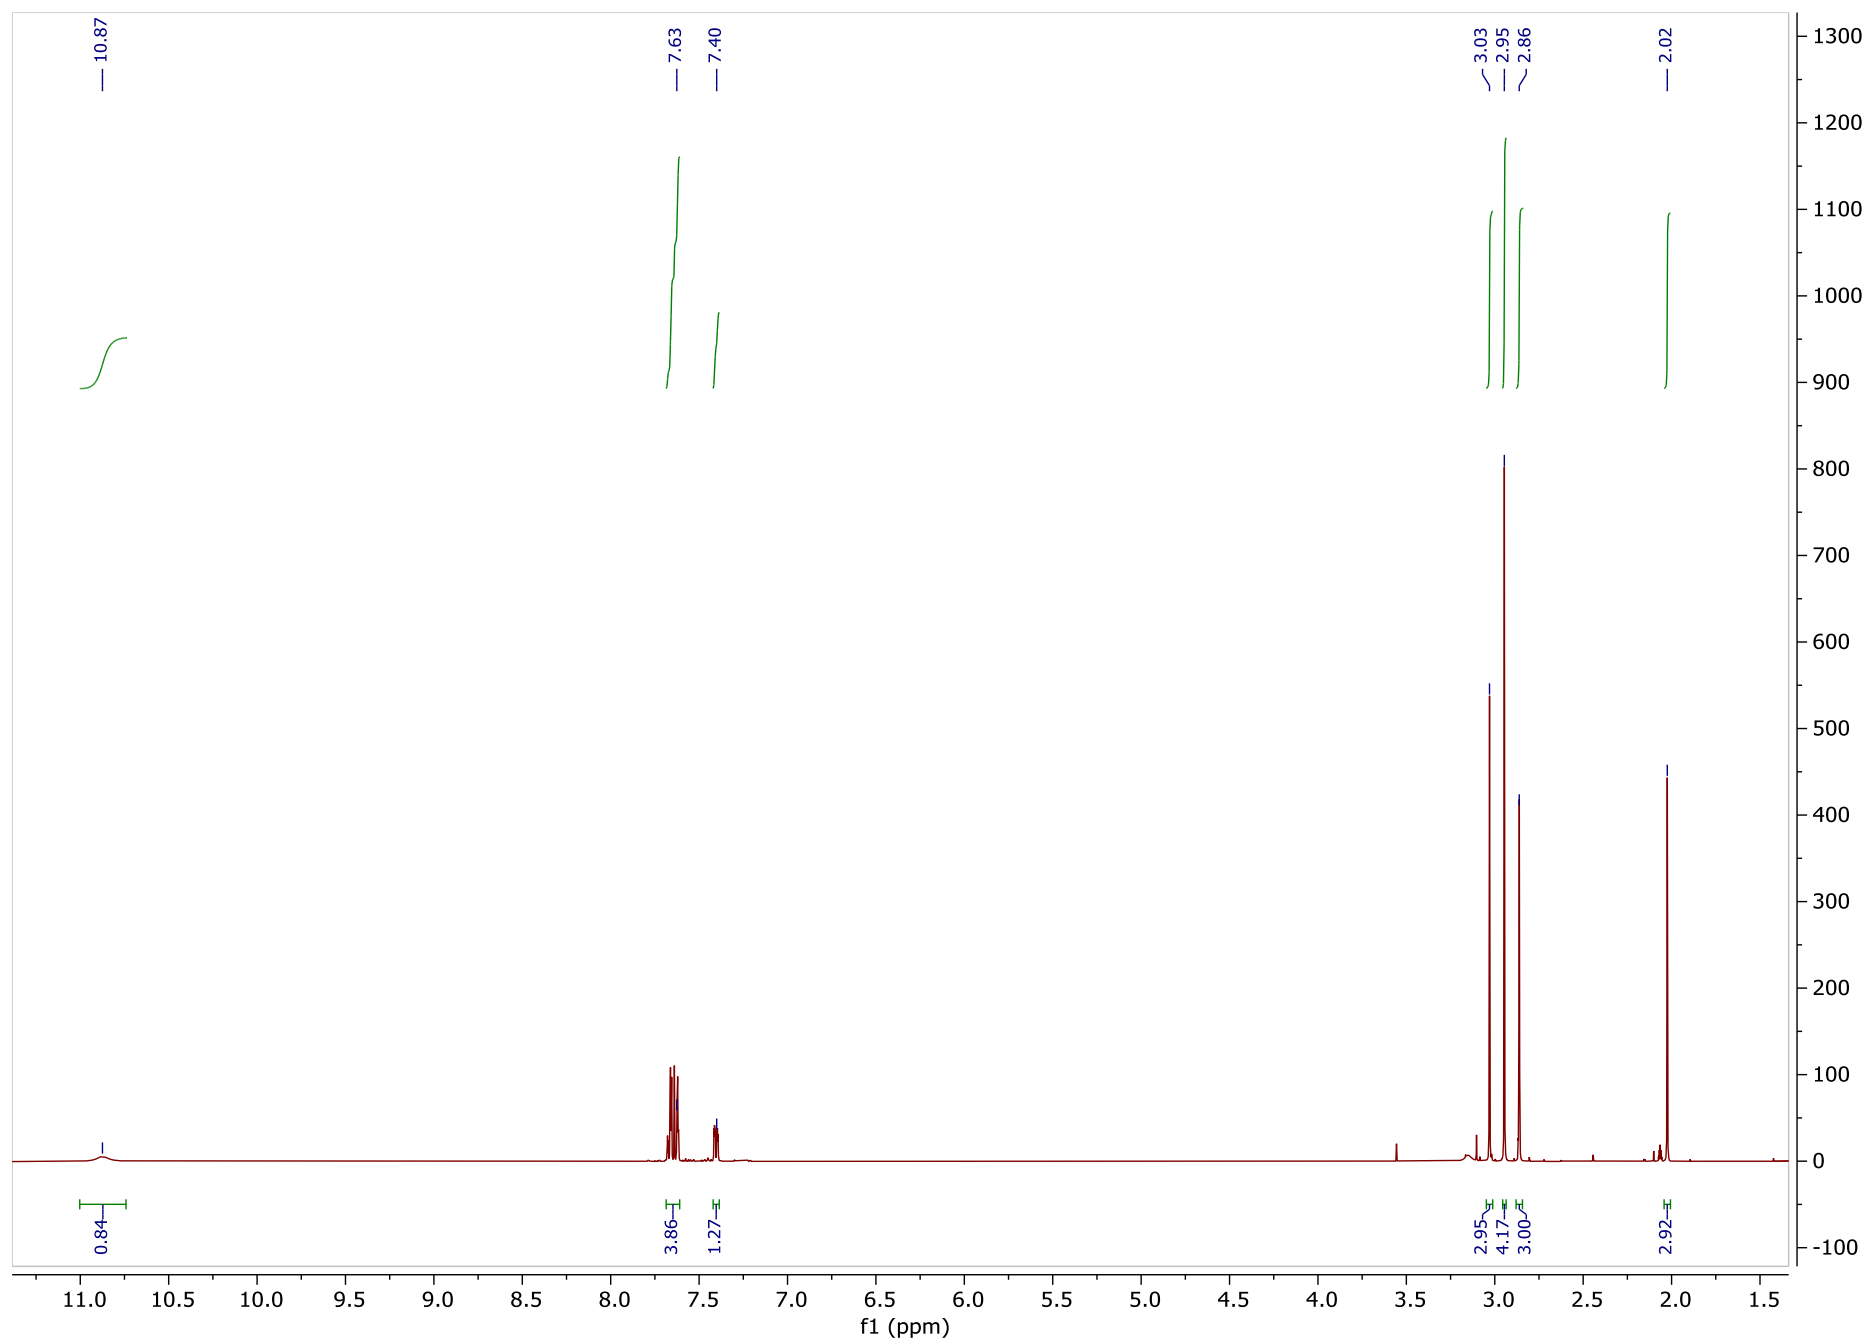



$^{13}\text{C}$  NMR of 3q, acetone, 126 MHz

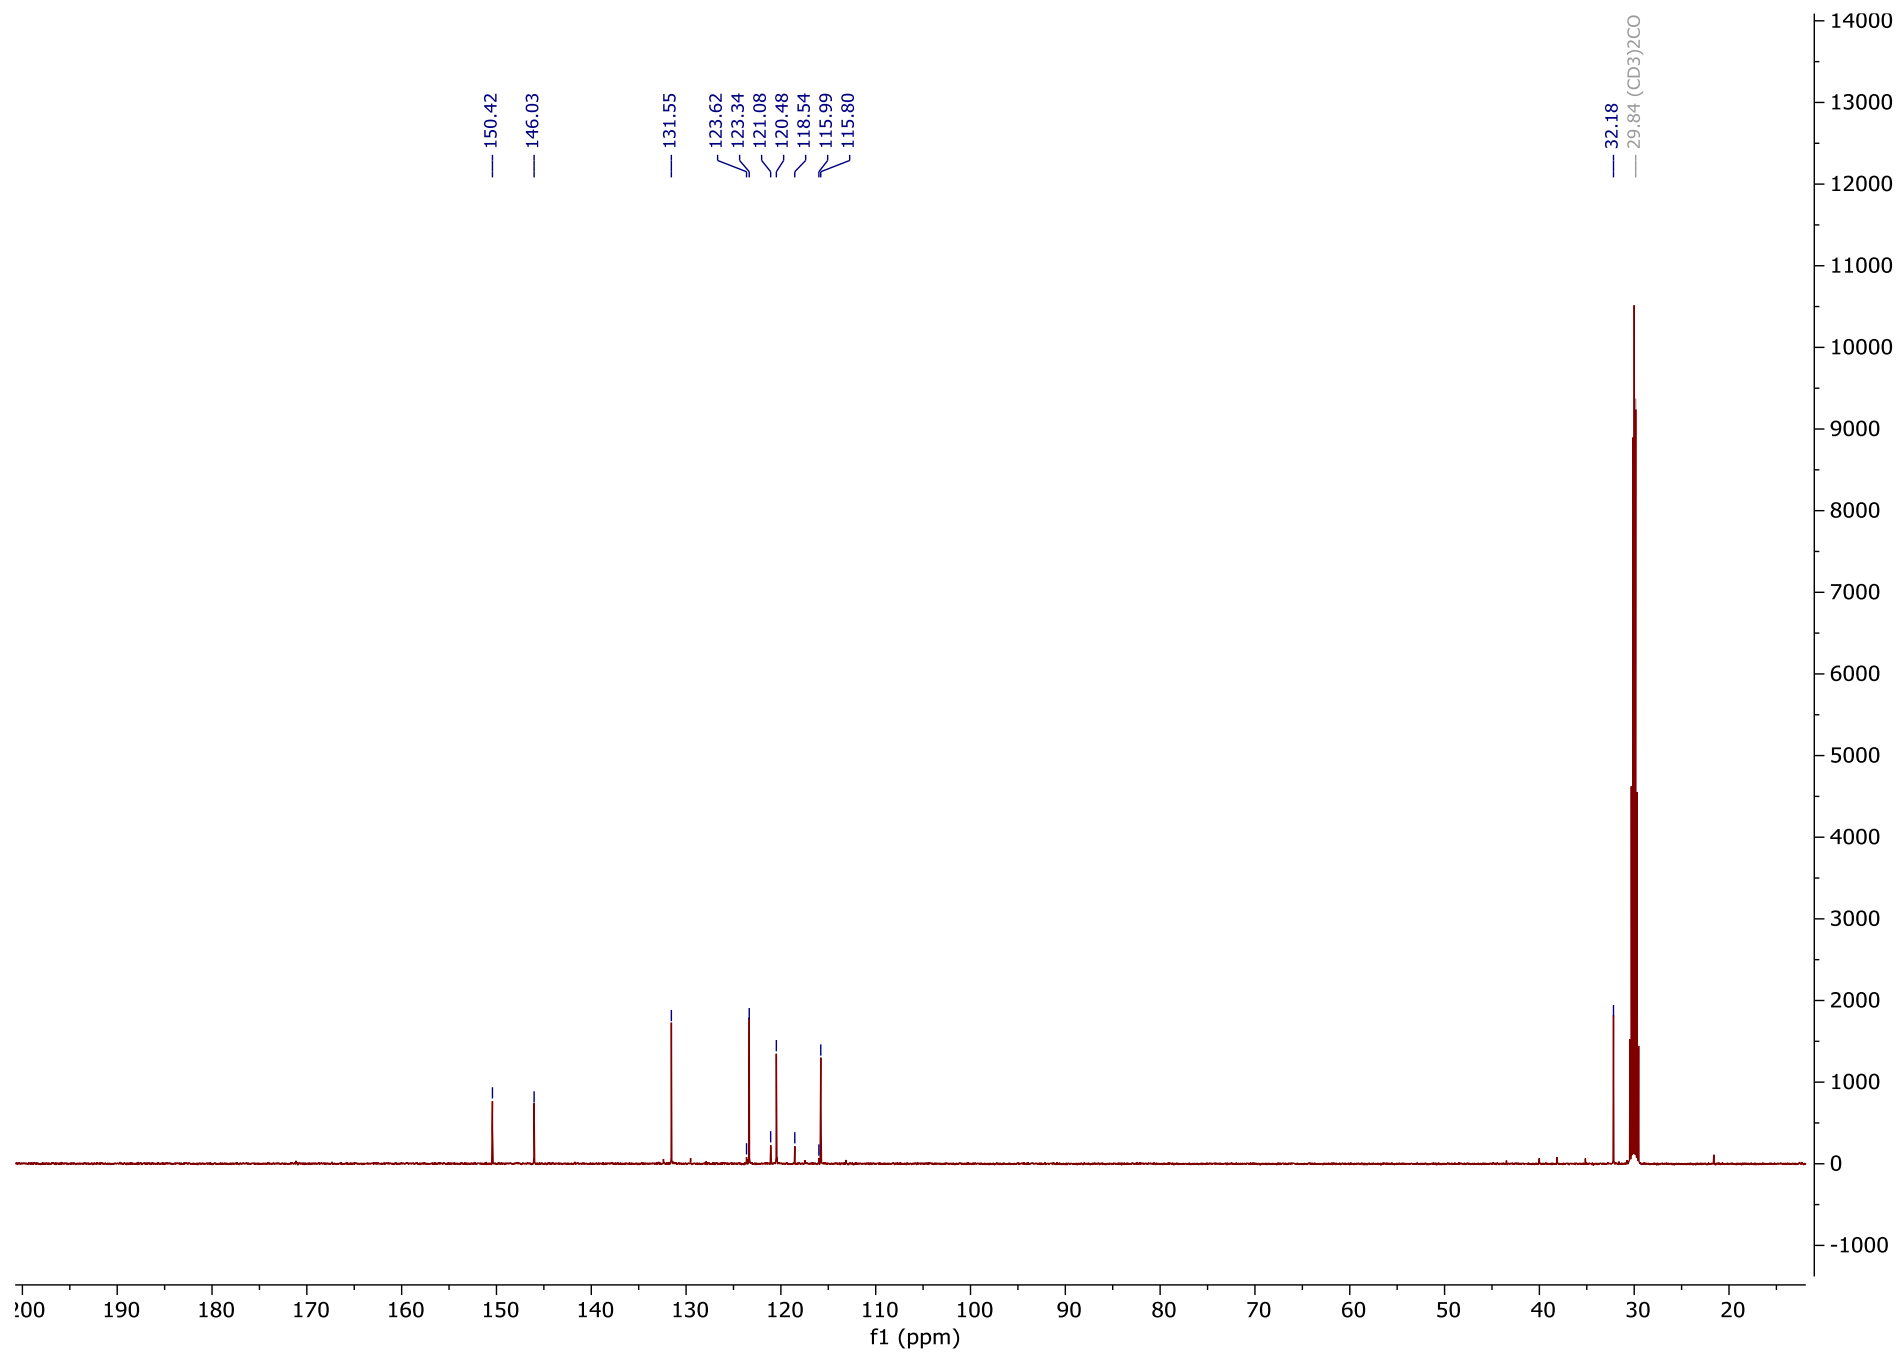

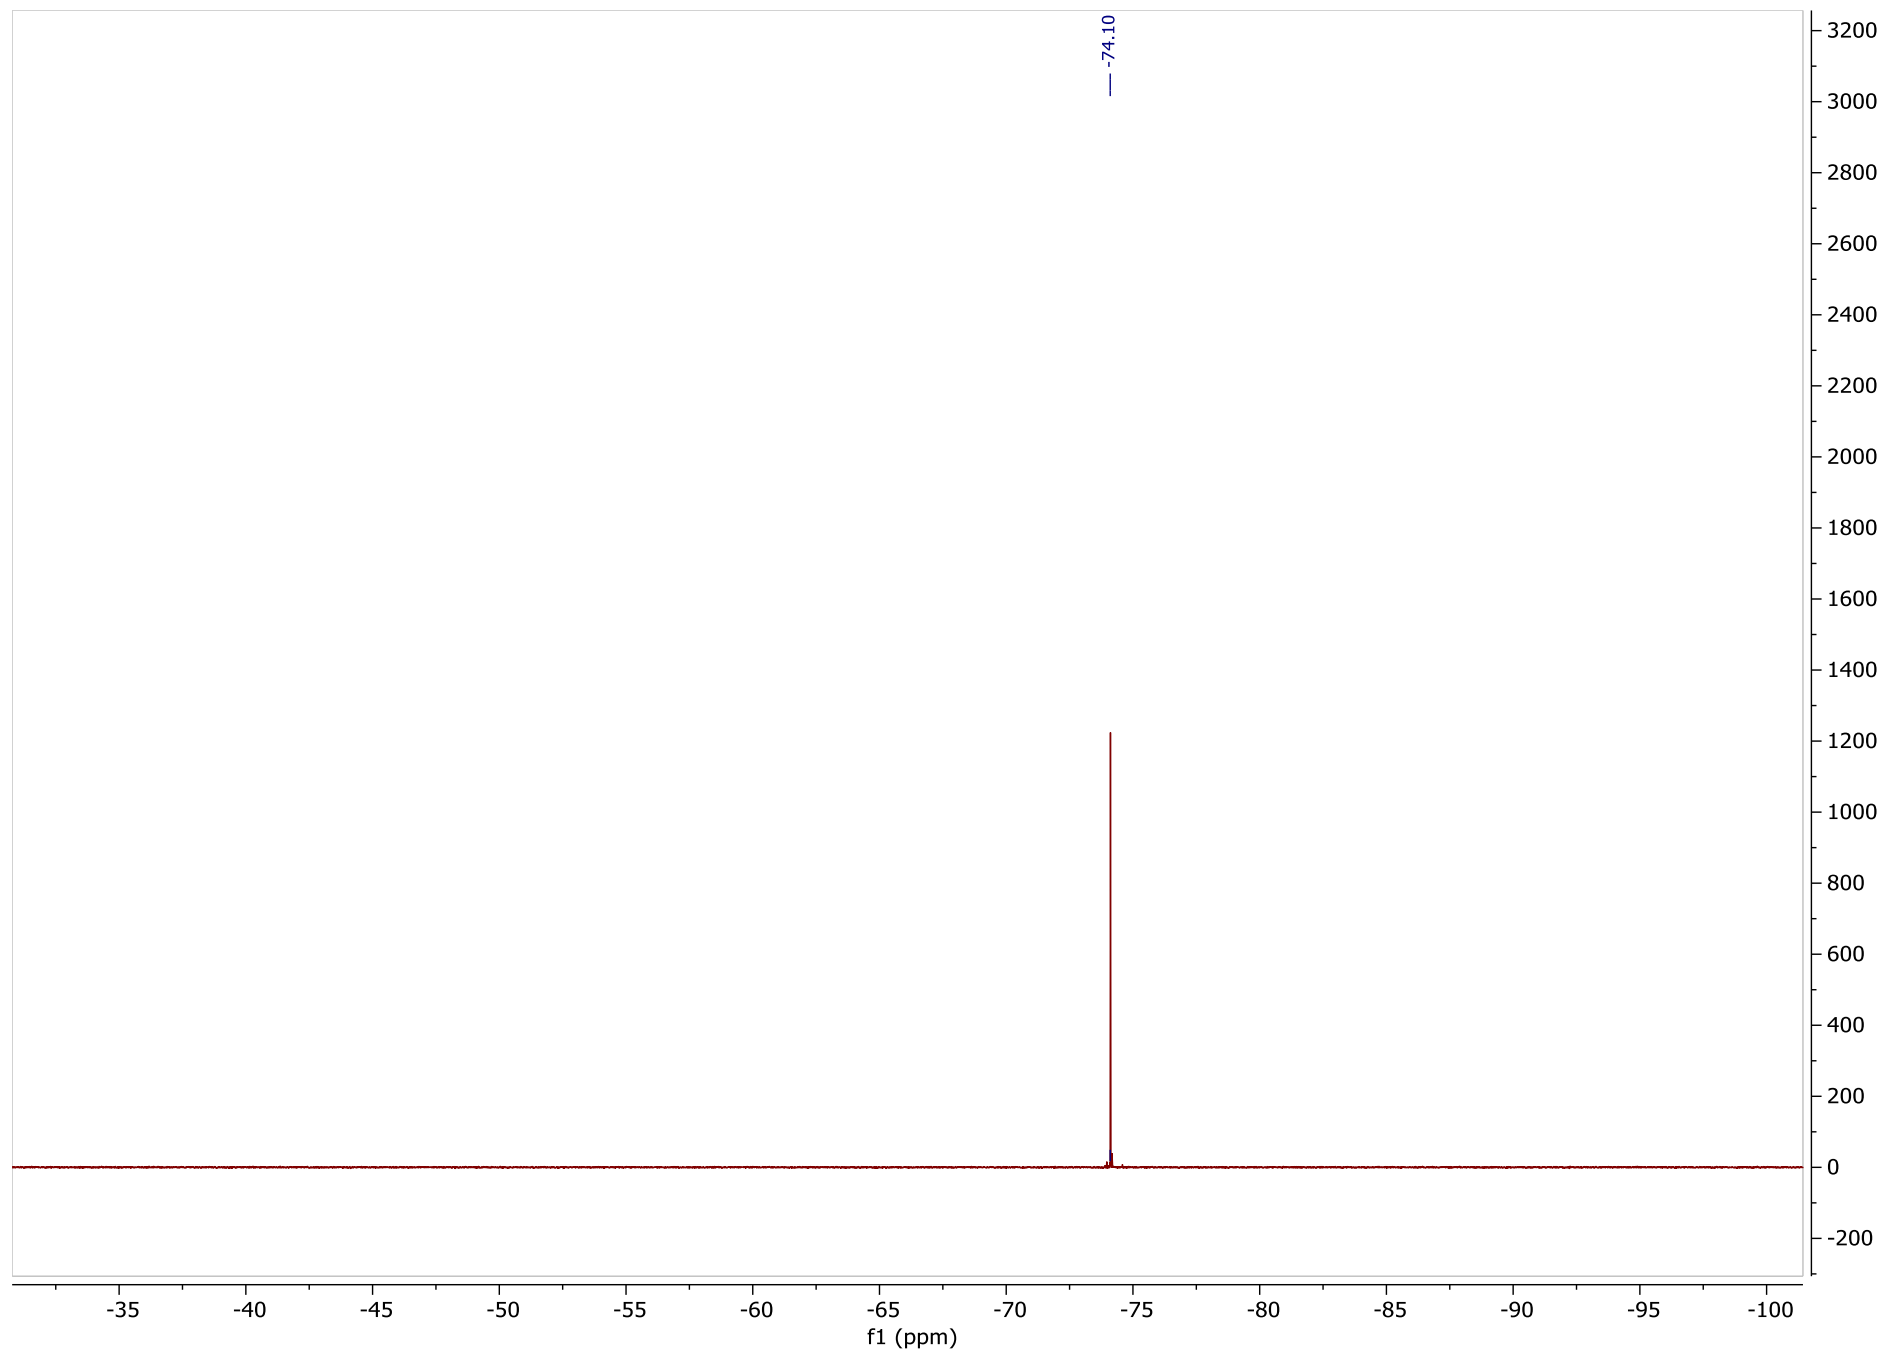

<sup>1</sup>H NMR of 3r, acetone, 500 MHz

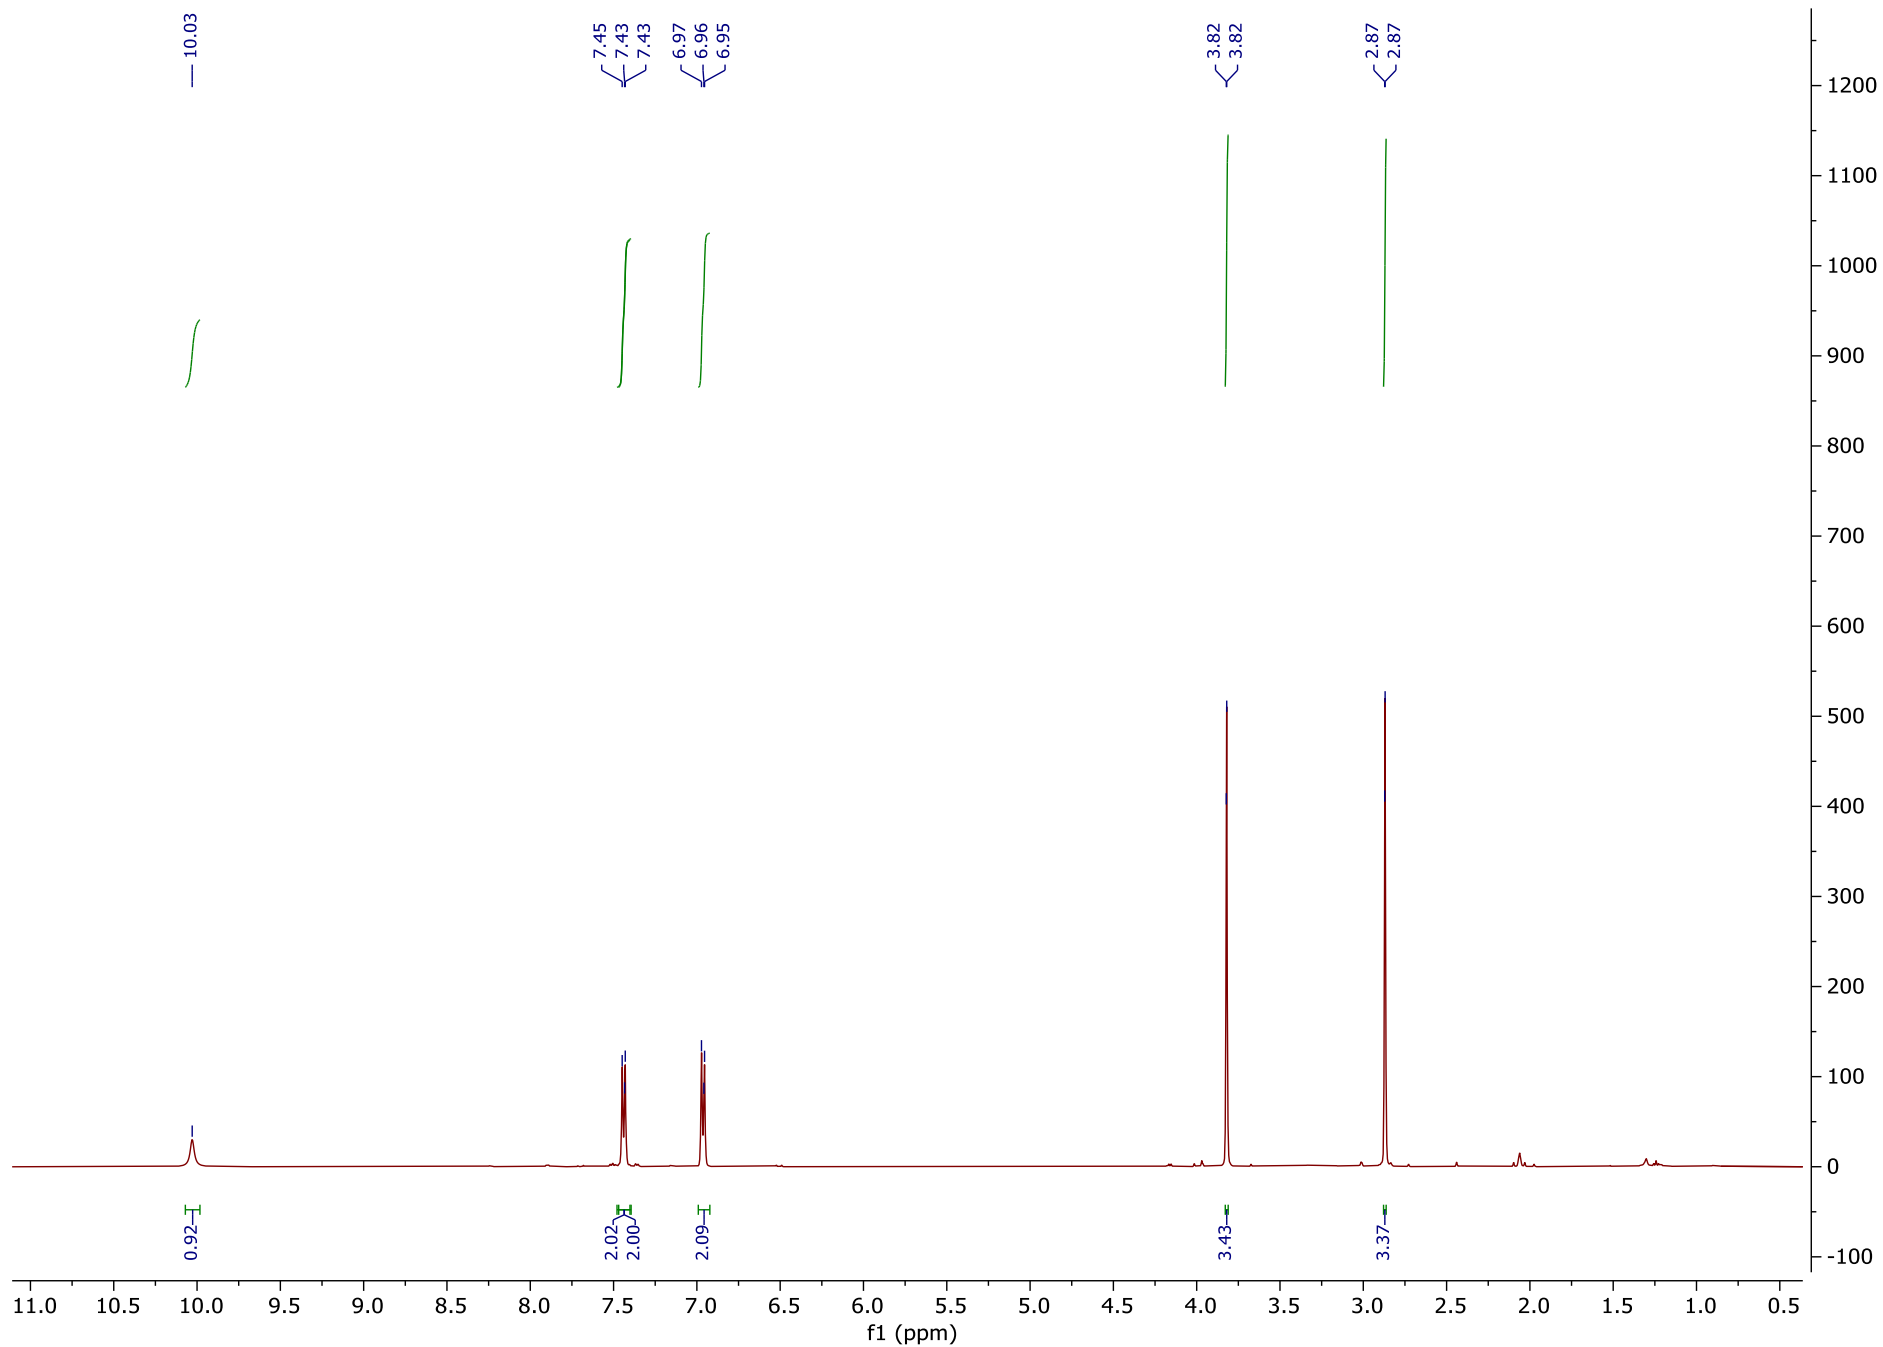

$^{13}\text{C}$  NMR of 3r, acetone, 126 MHz

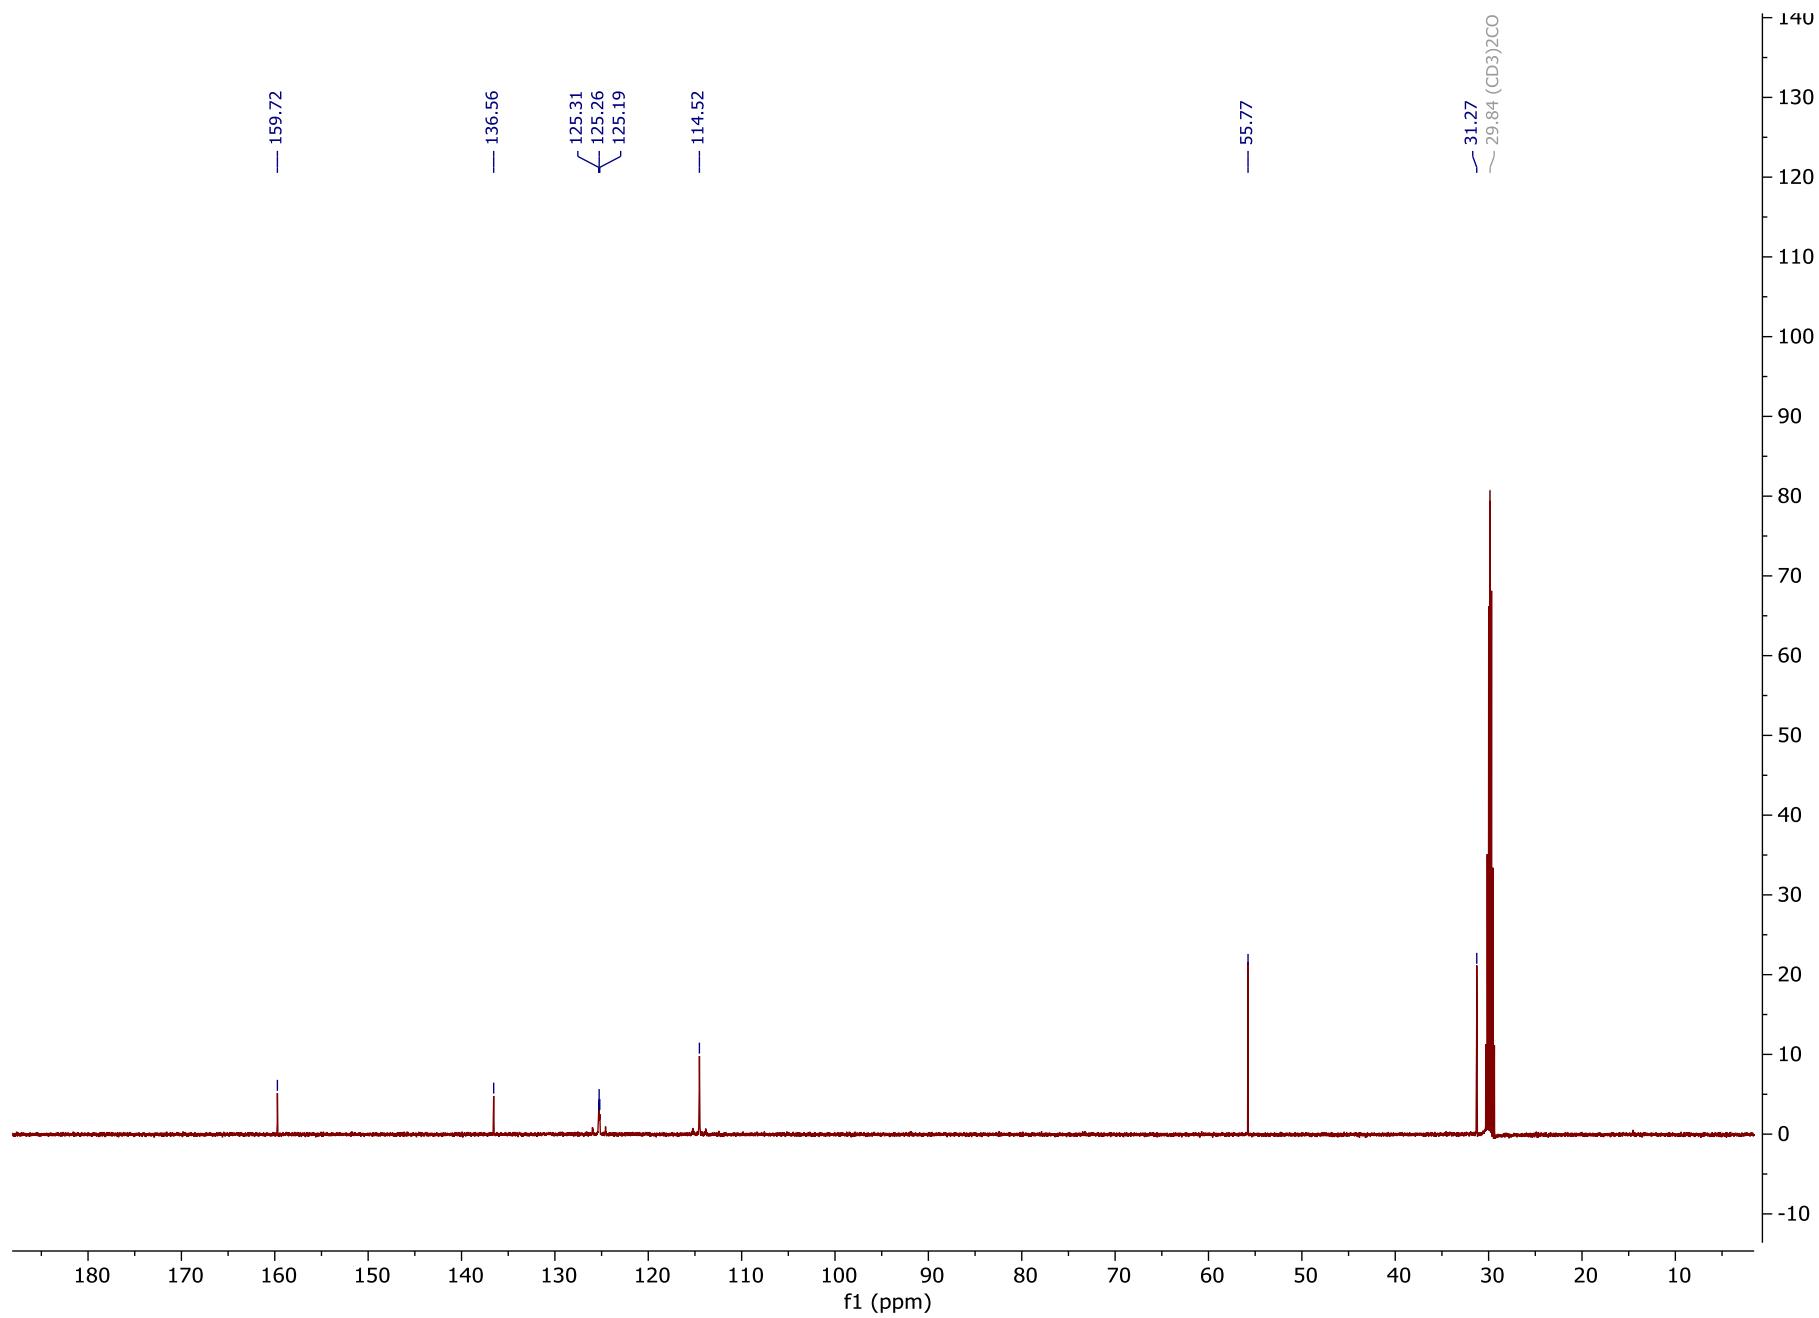

<sup>1</sup>H NMR of 3s, acetone, 500 MHz

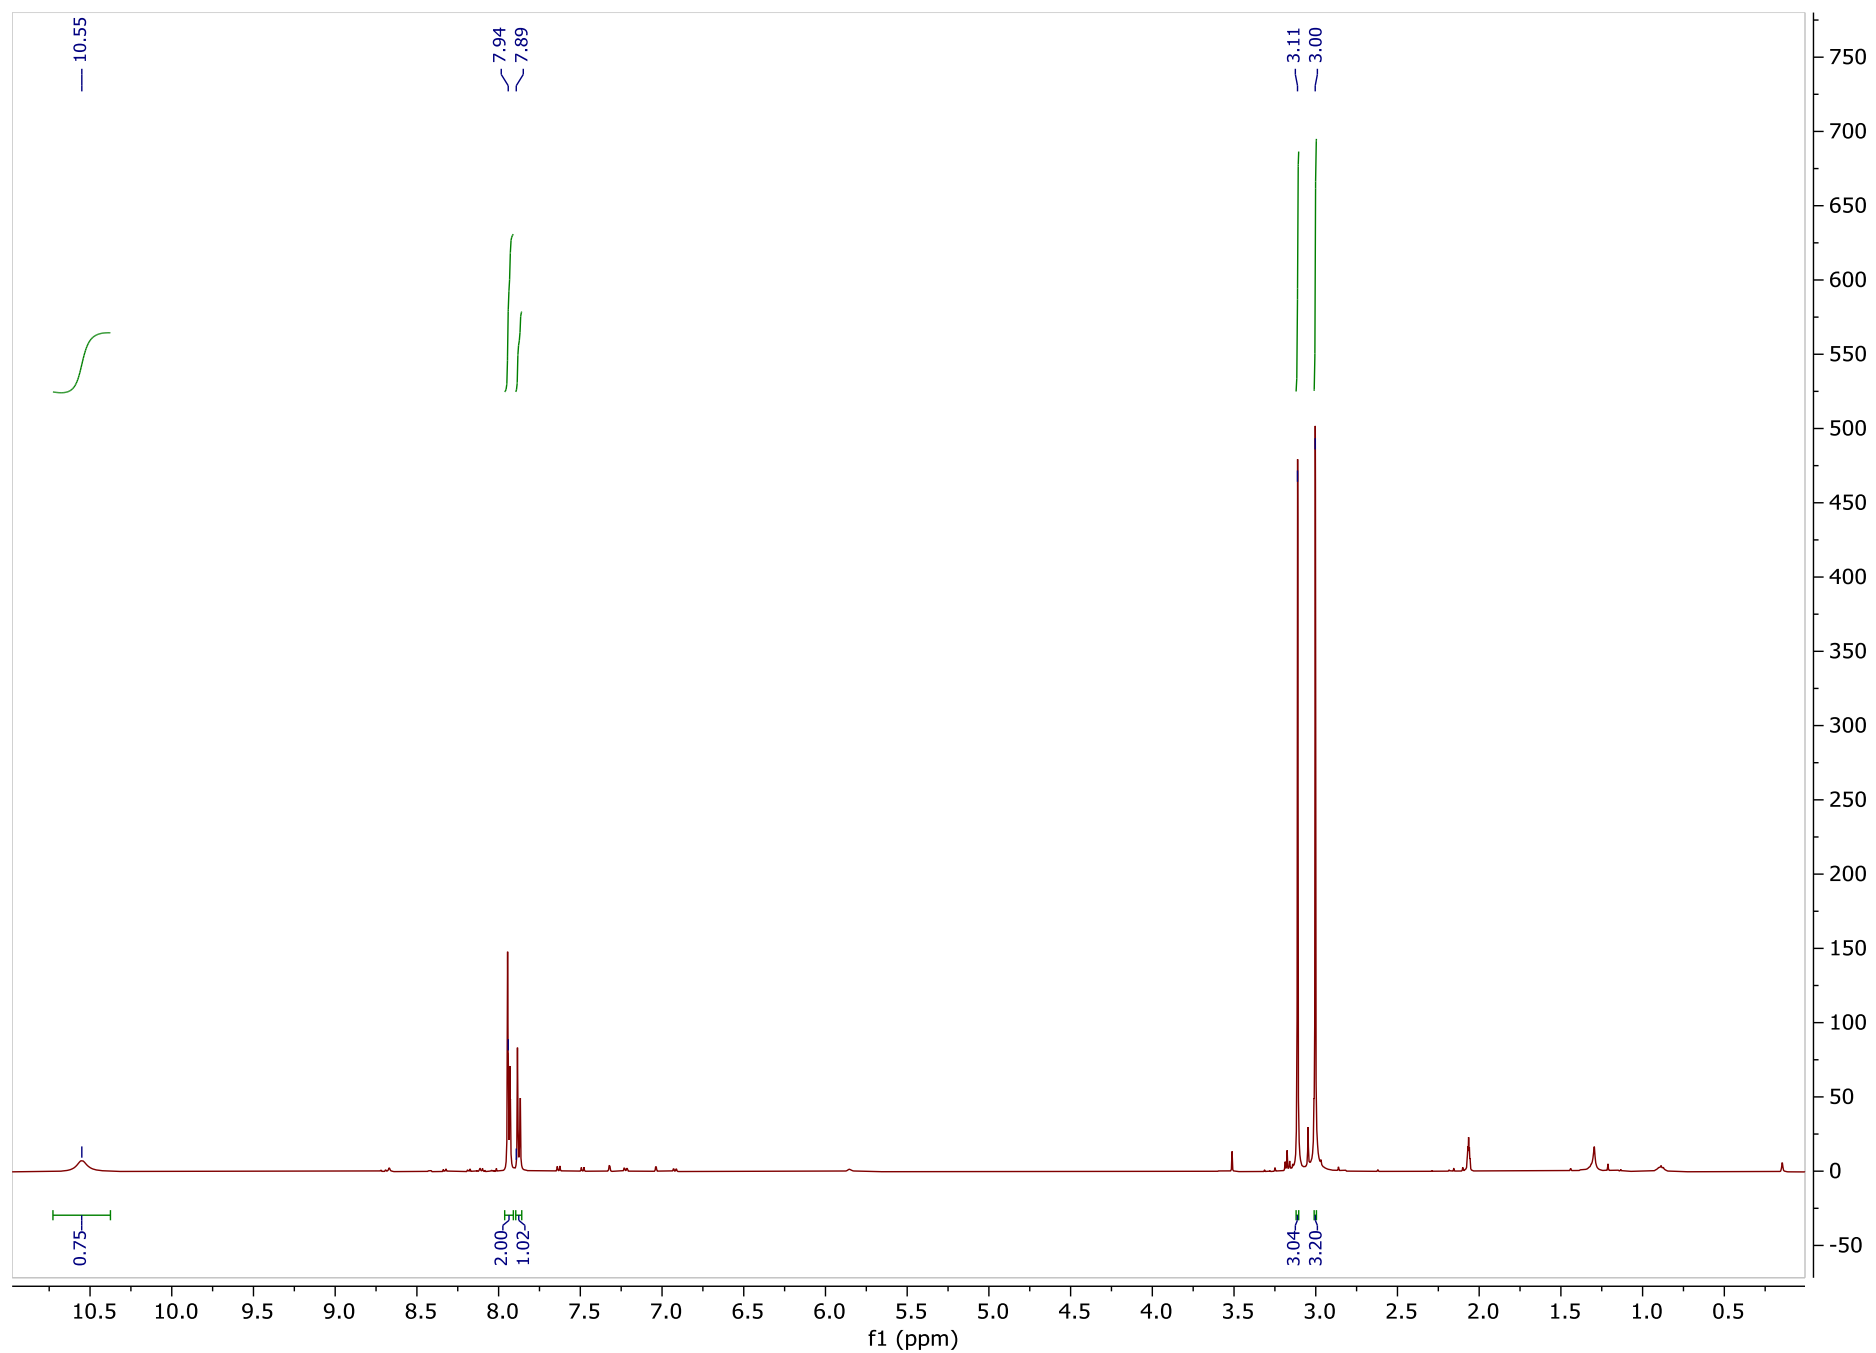

$^{13}\text{C}$  NMR of 3s, acetone, 126 MHz

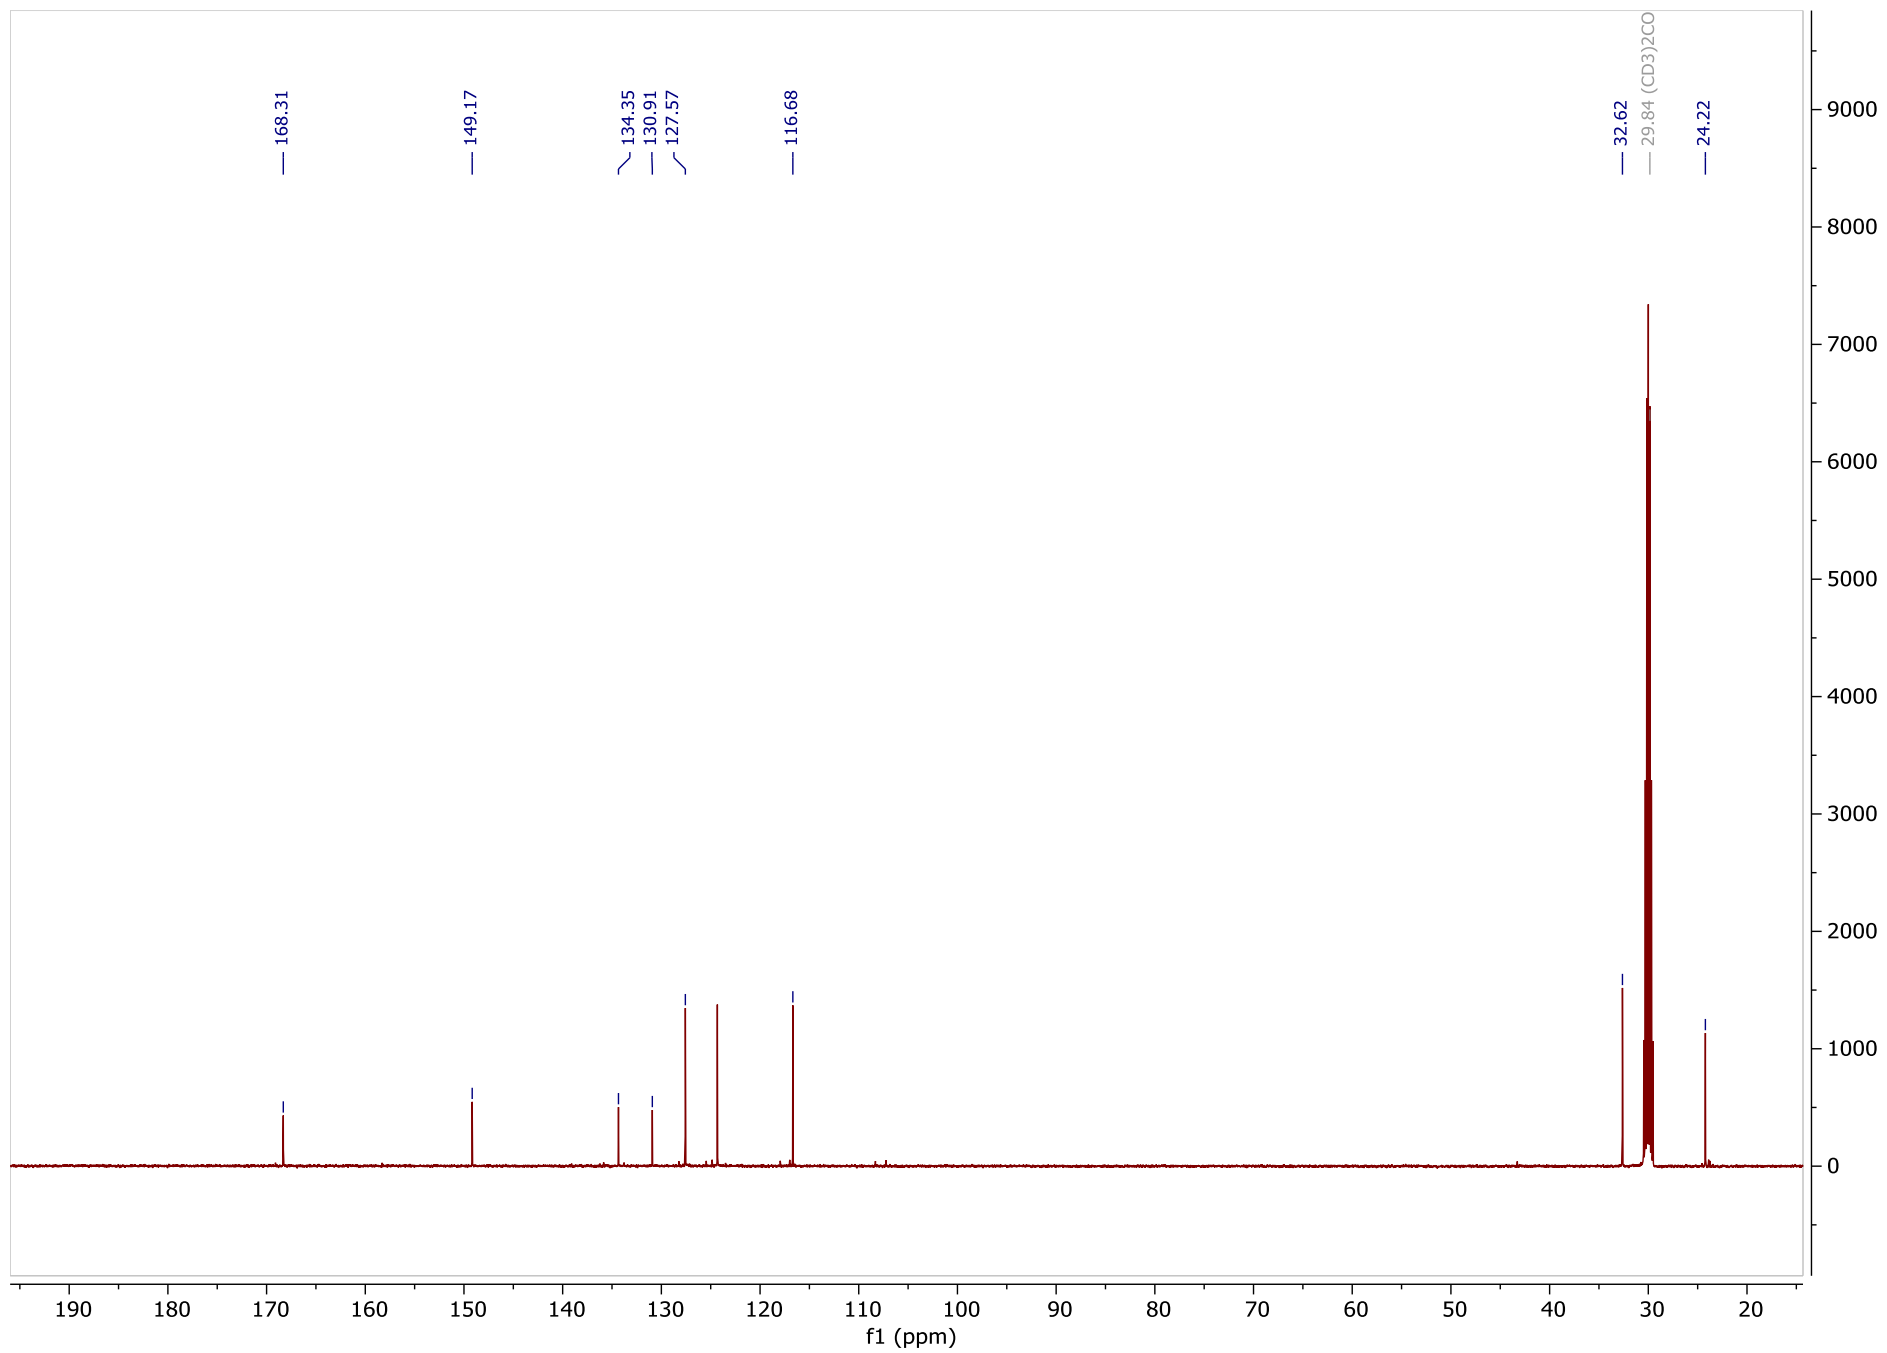

<sup>1</sup>H NMR of 3t, MeCN/acetone, 500 MHz

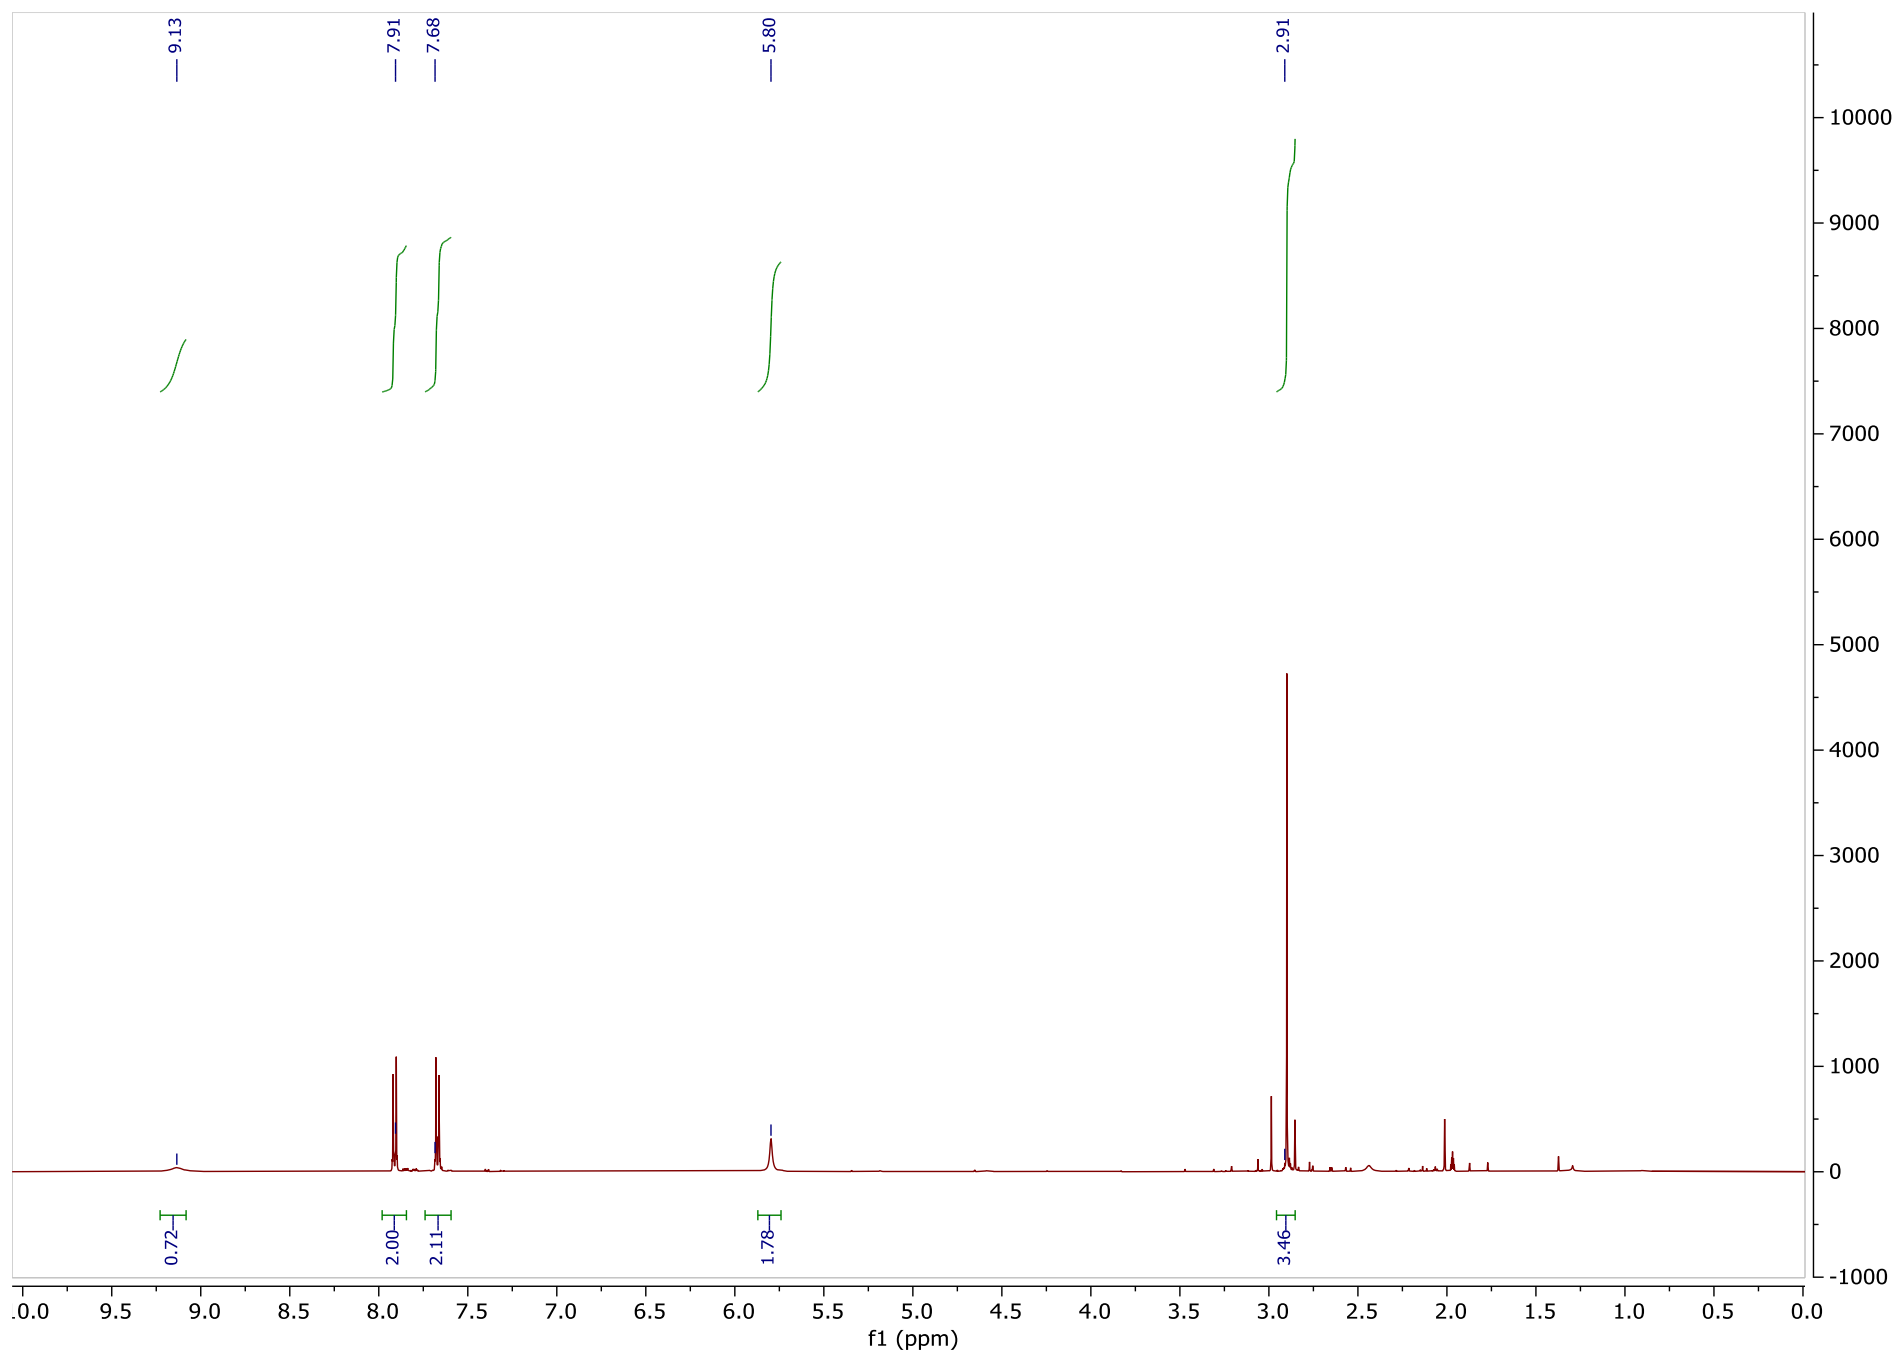

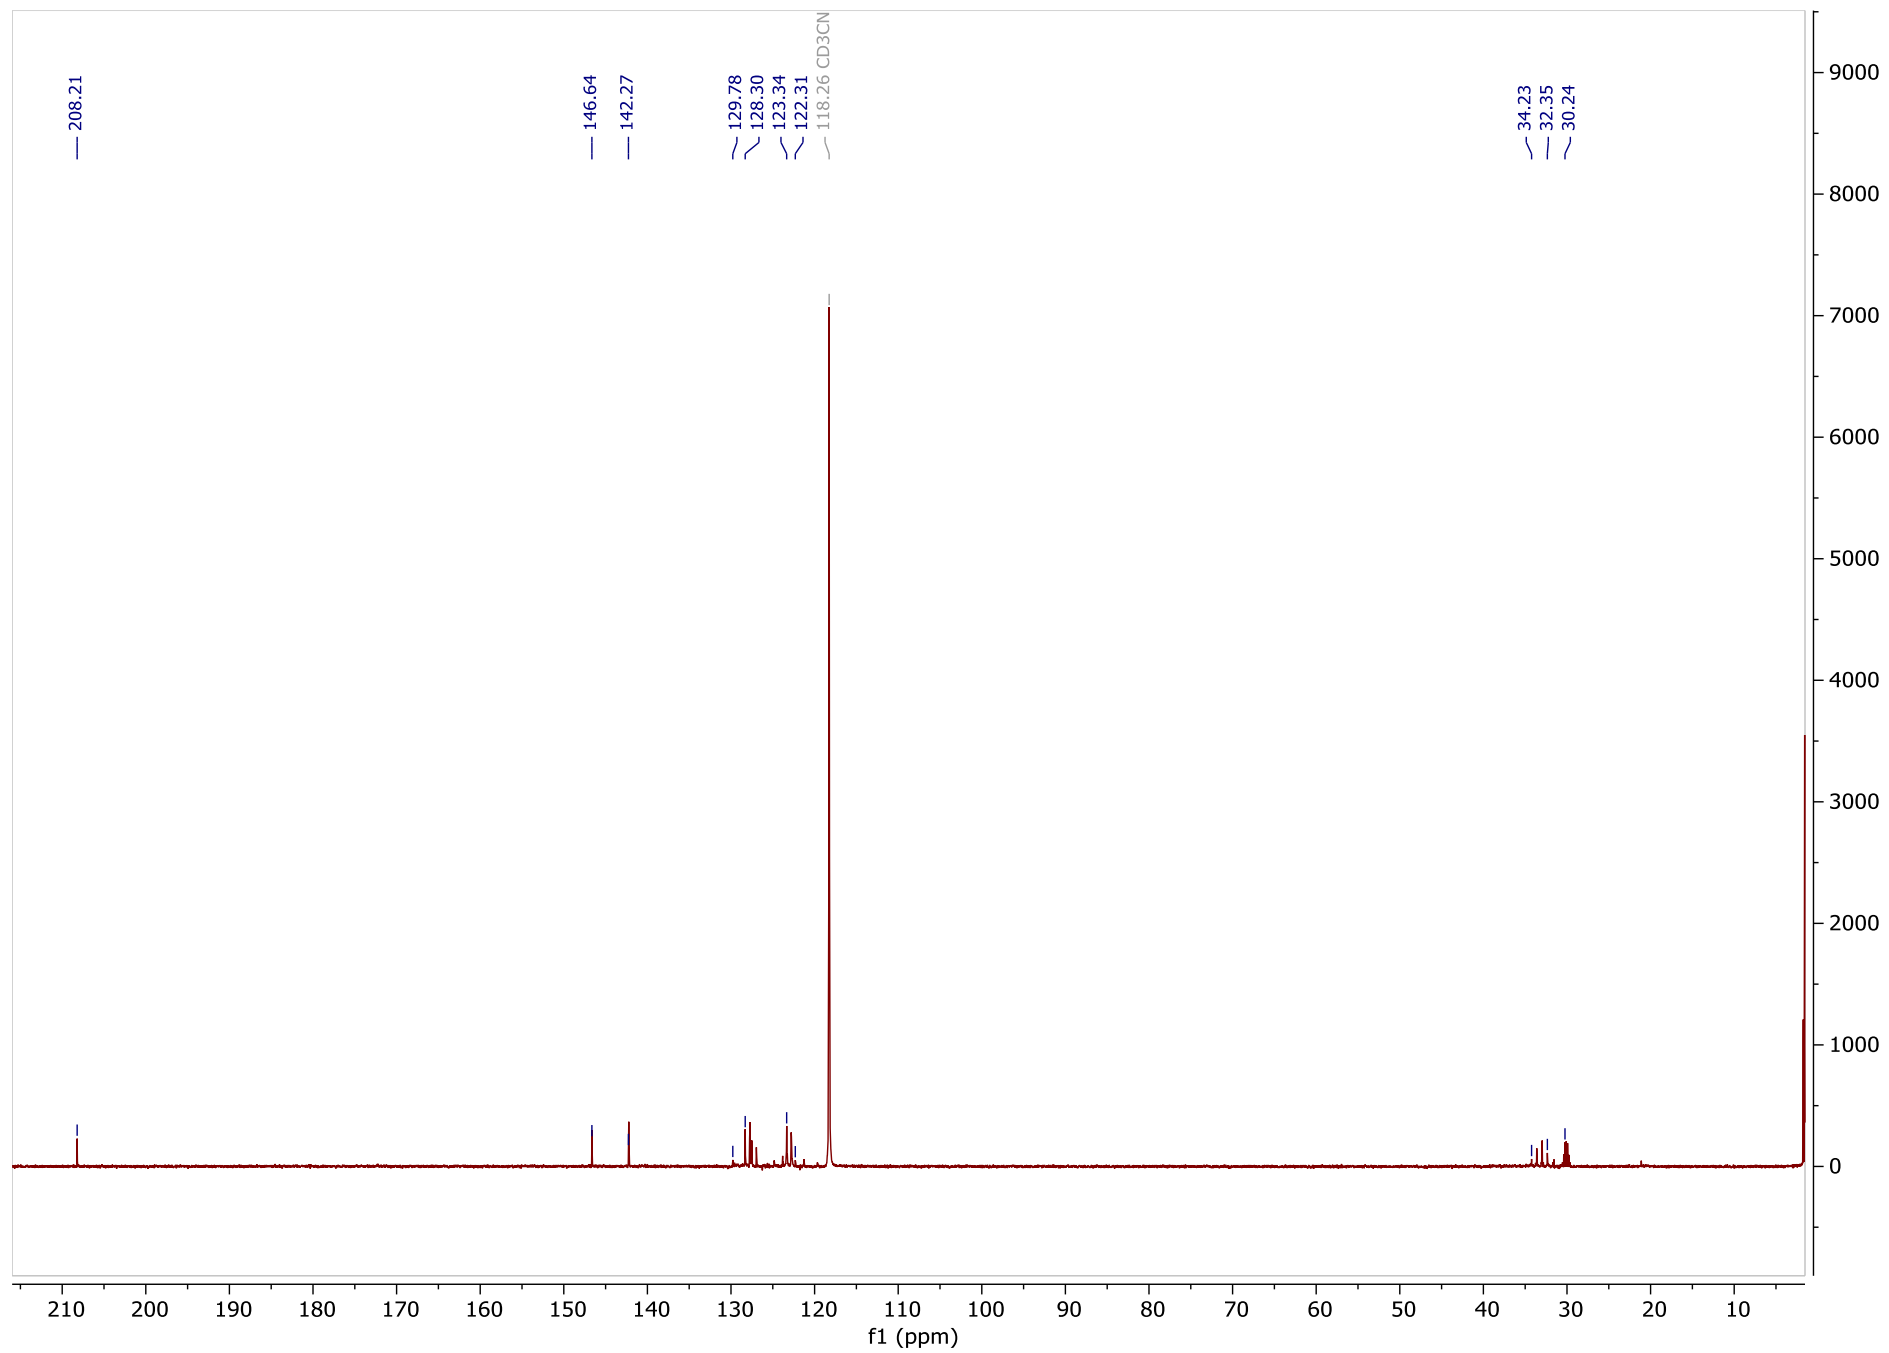



<sup>1</sup>H NMR of 3u, acetone, 500 MHz

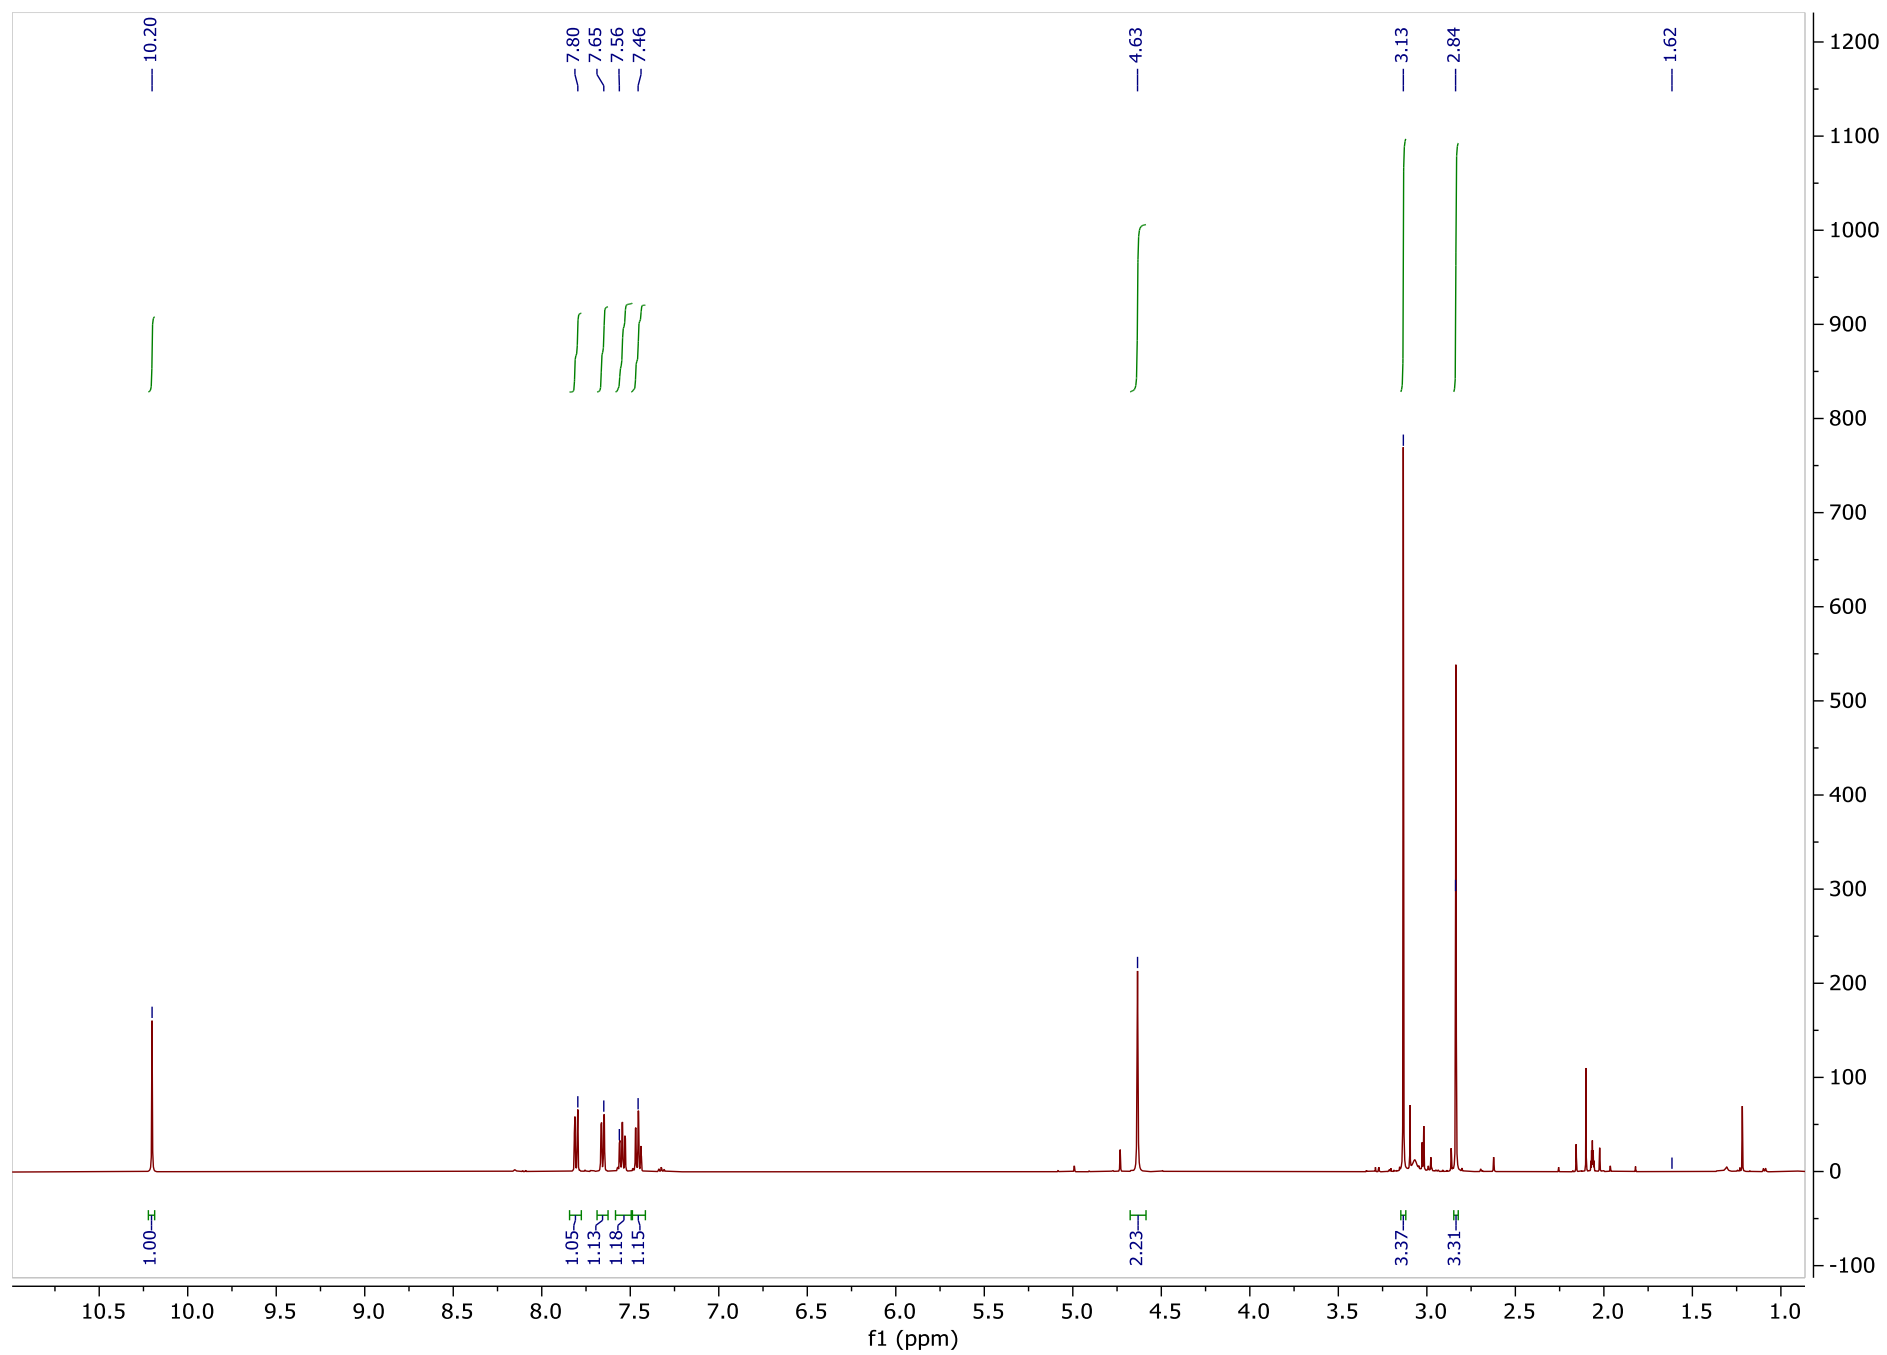

$^{13}\text{C}$  NMR of 3u, acetone, 126 MHz

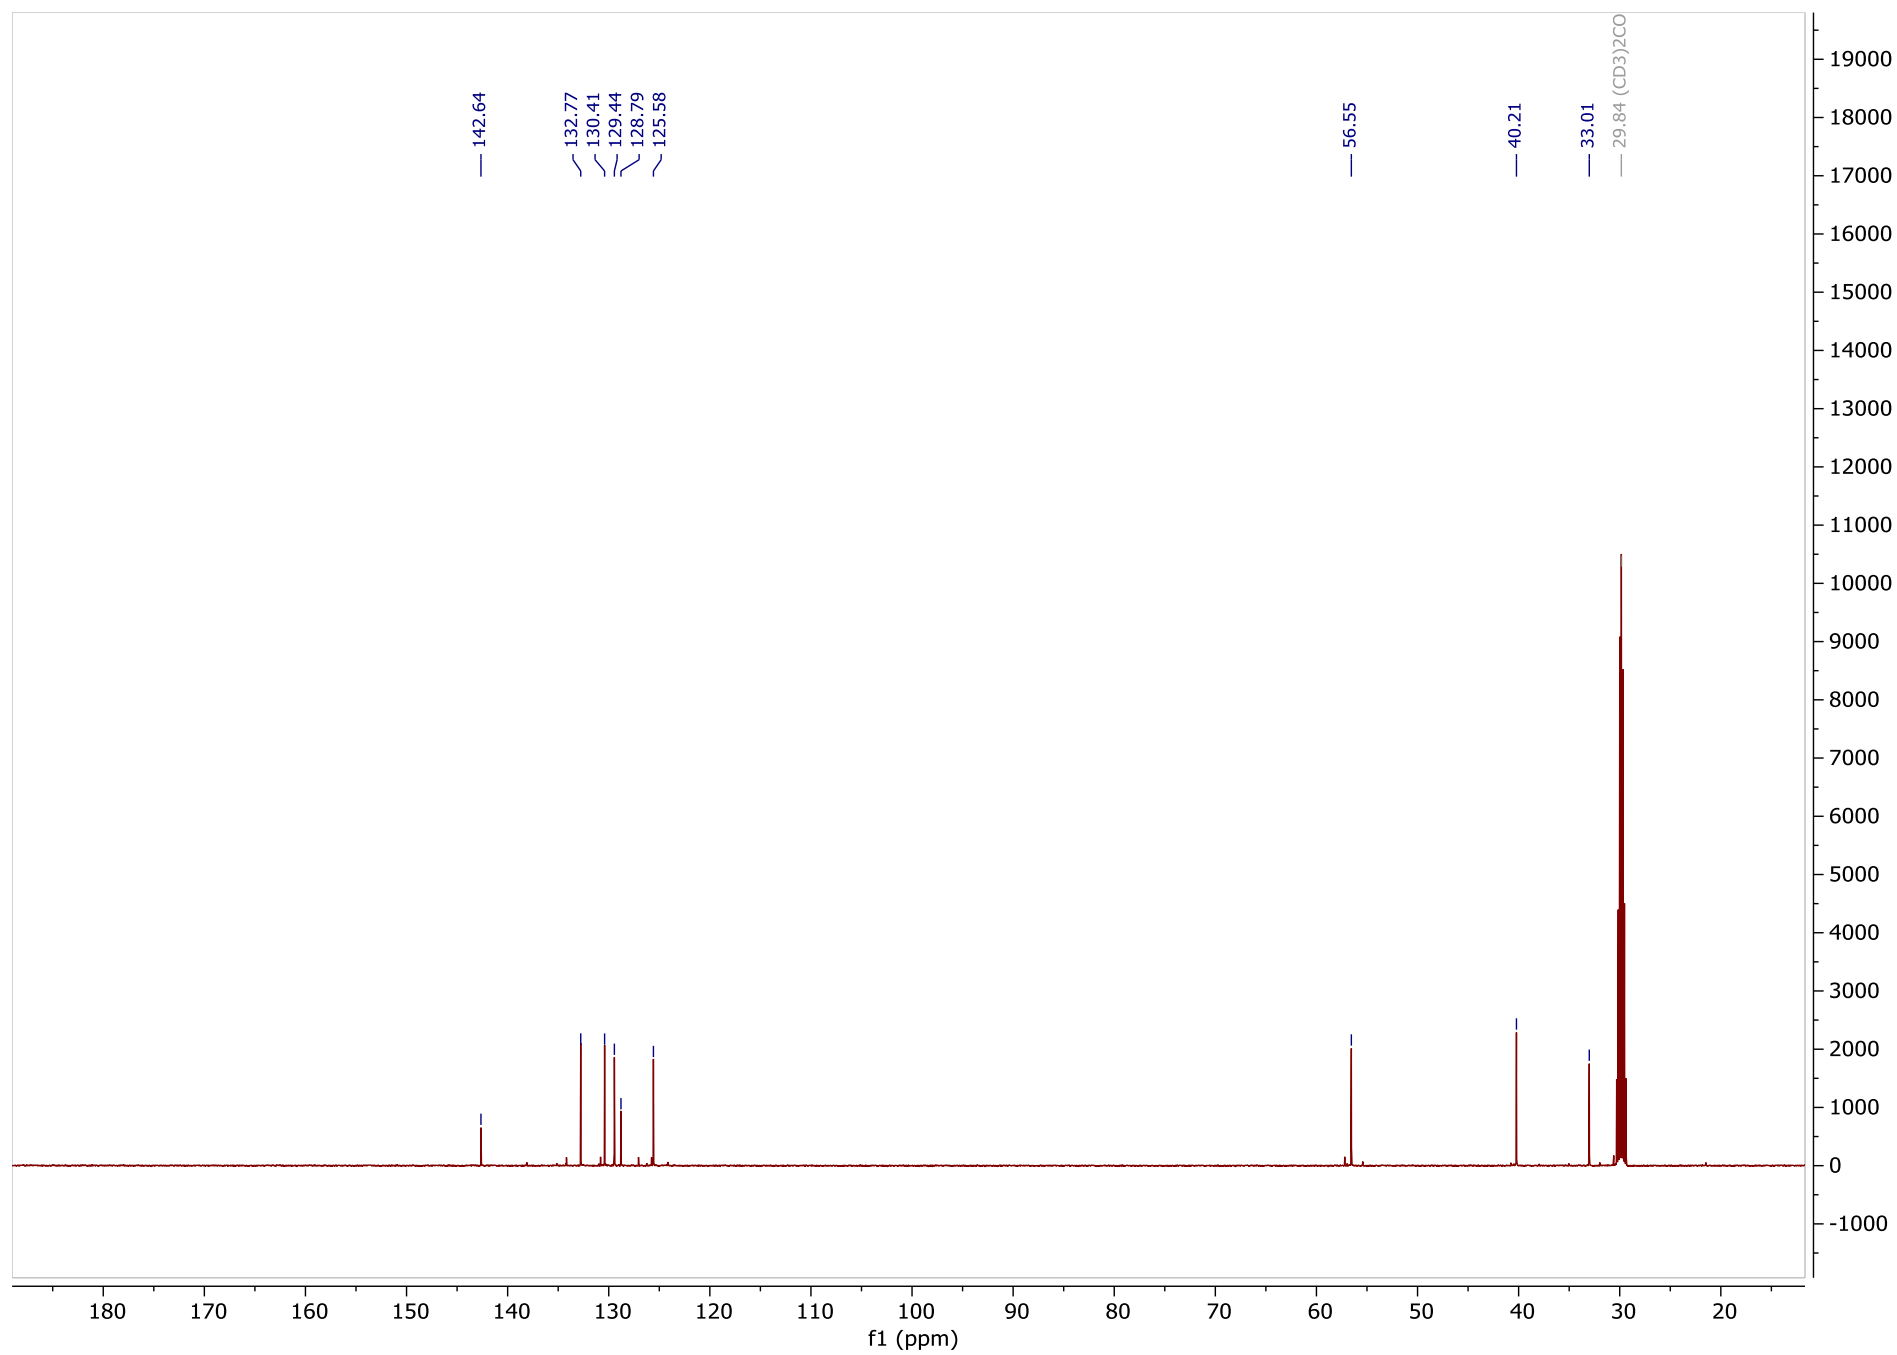

<sup>1</sup>H NMR of 3v, acetone, 500 MHz

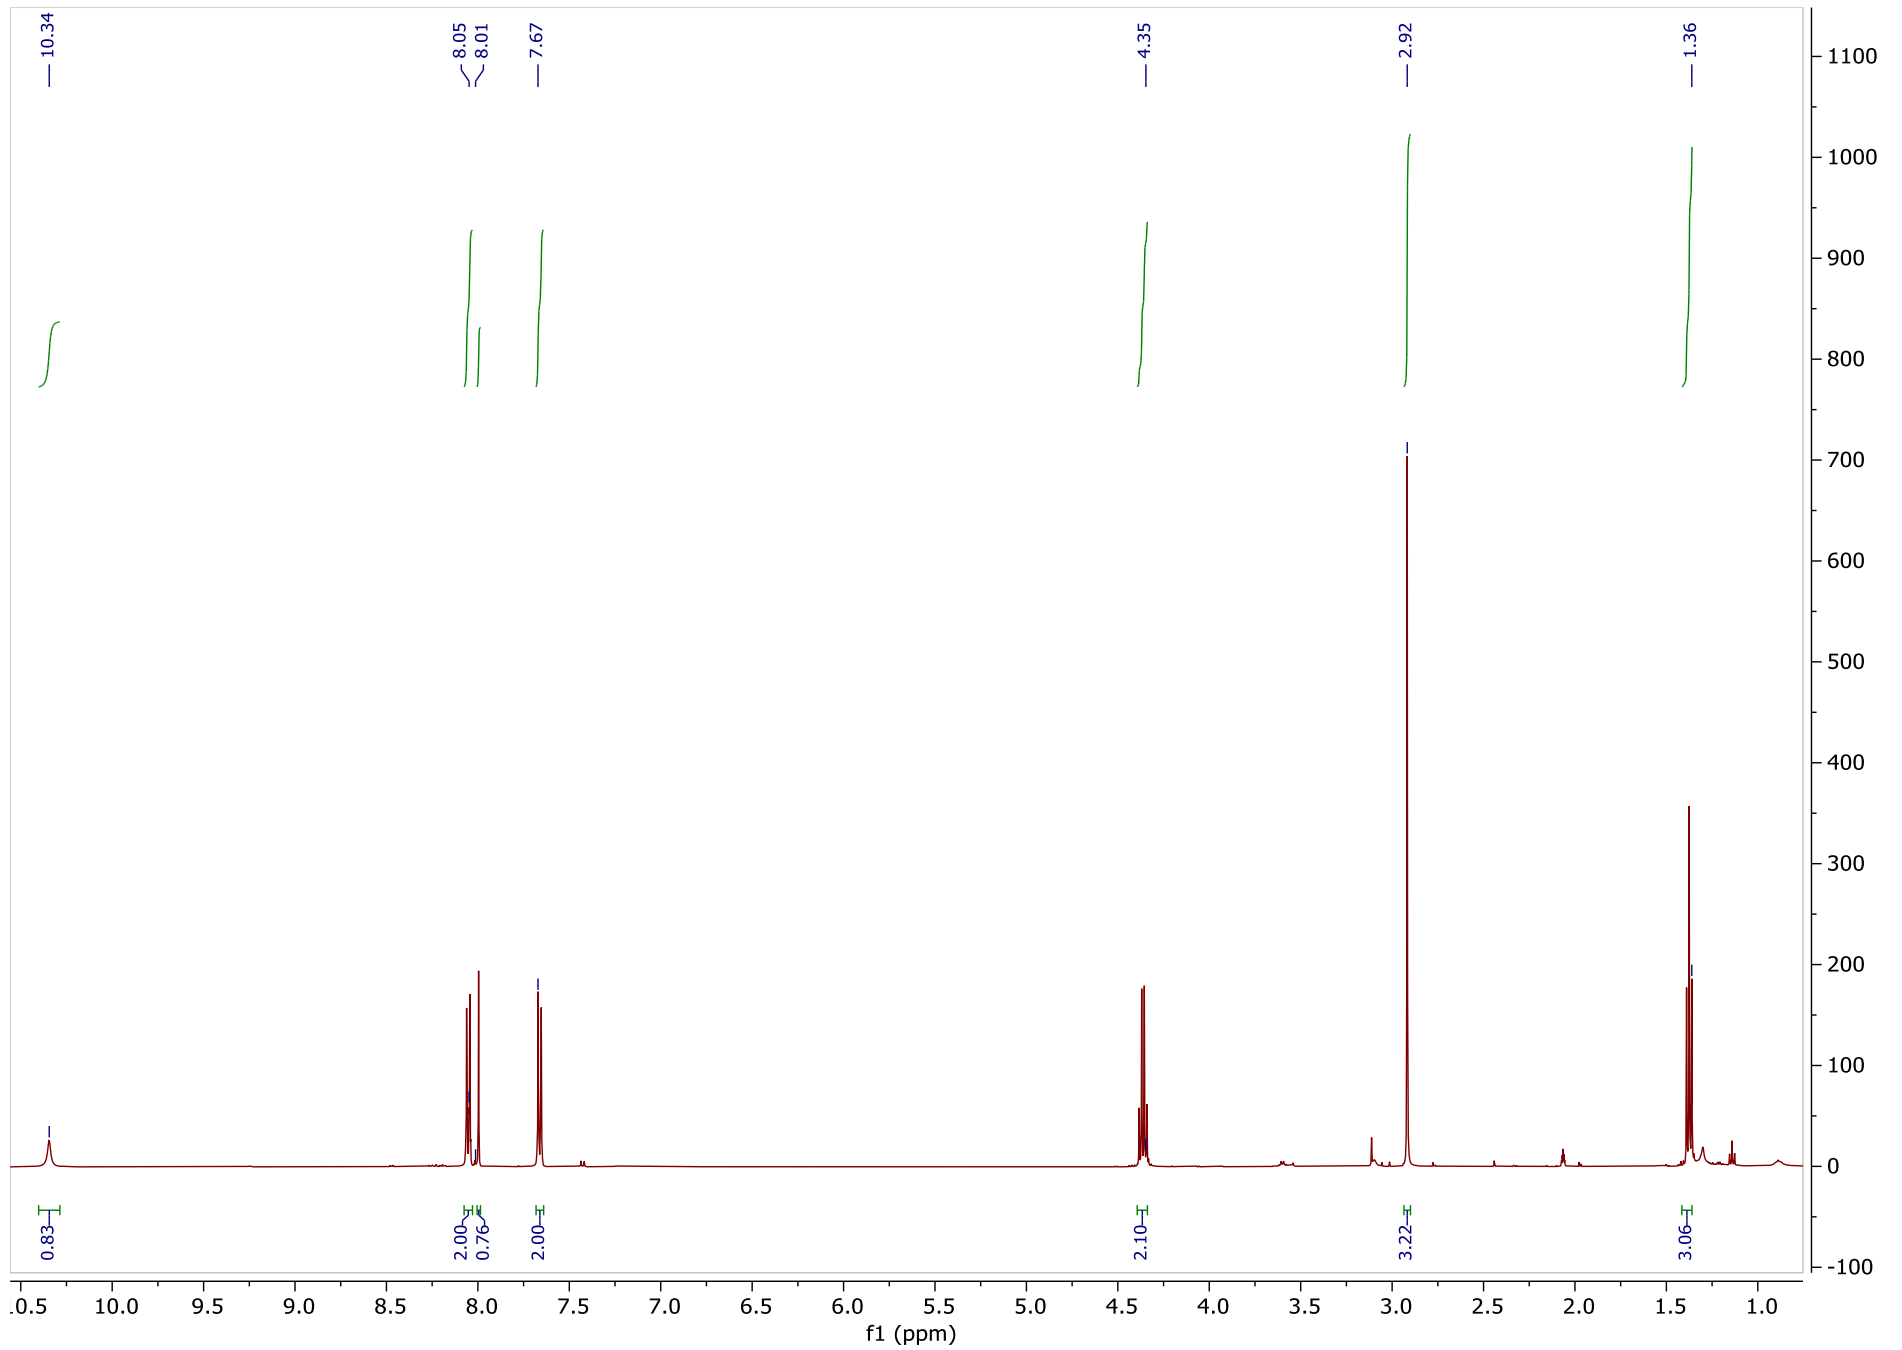

<sup>13</sup>C NMR of 3v, acetone, 126 MHz

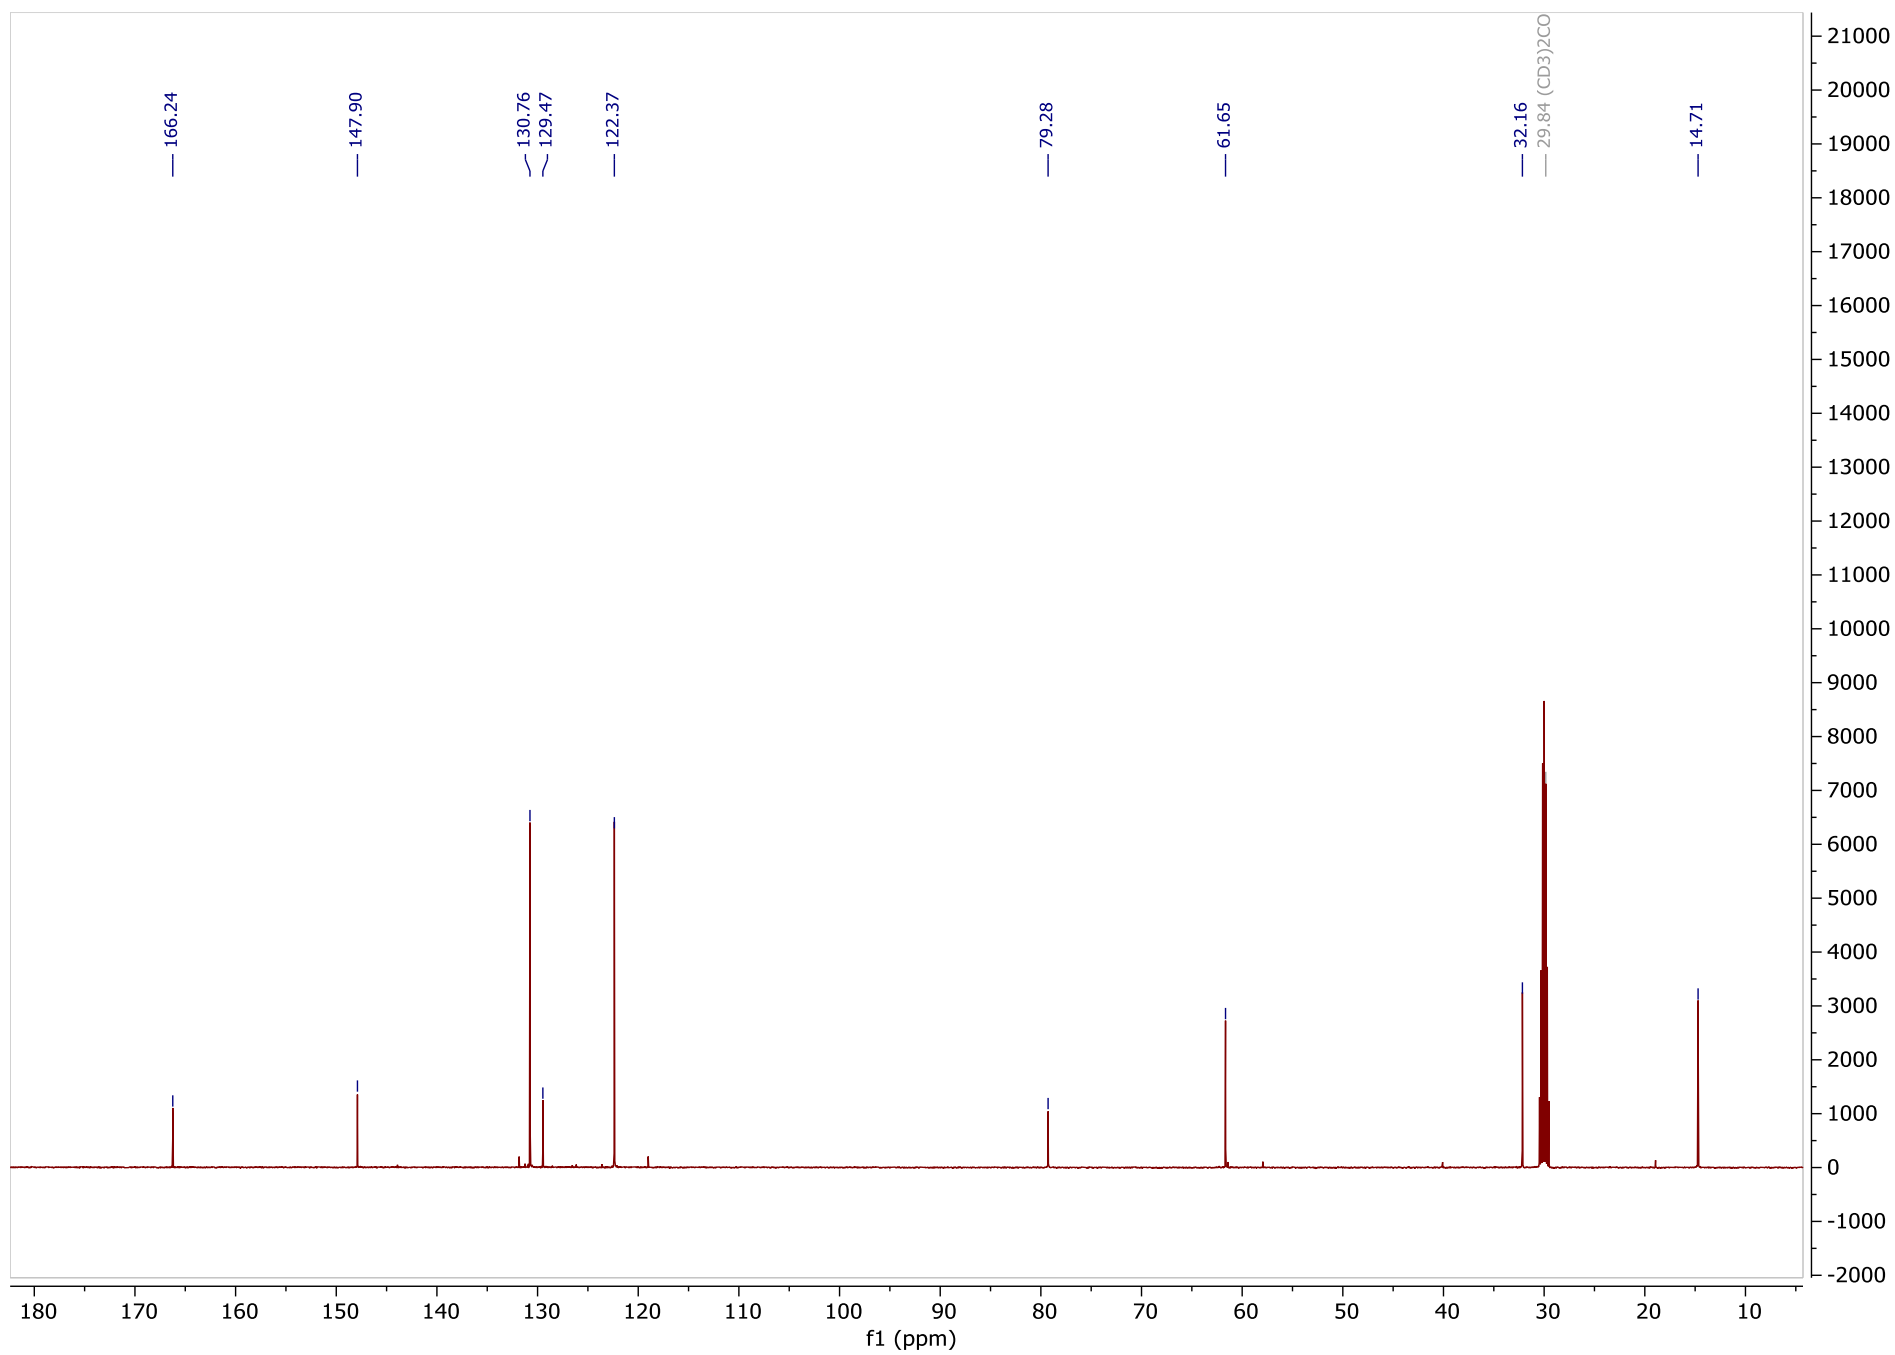

<sup>1</sup>H NMR of 3w, acetone, 500 MHz

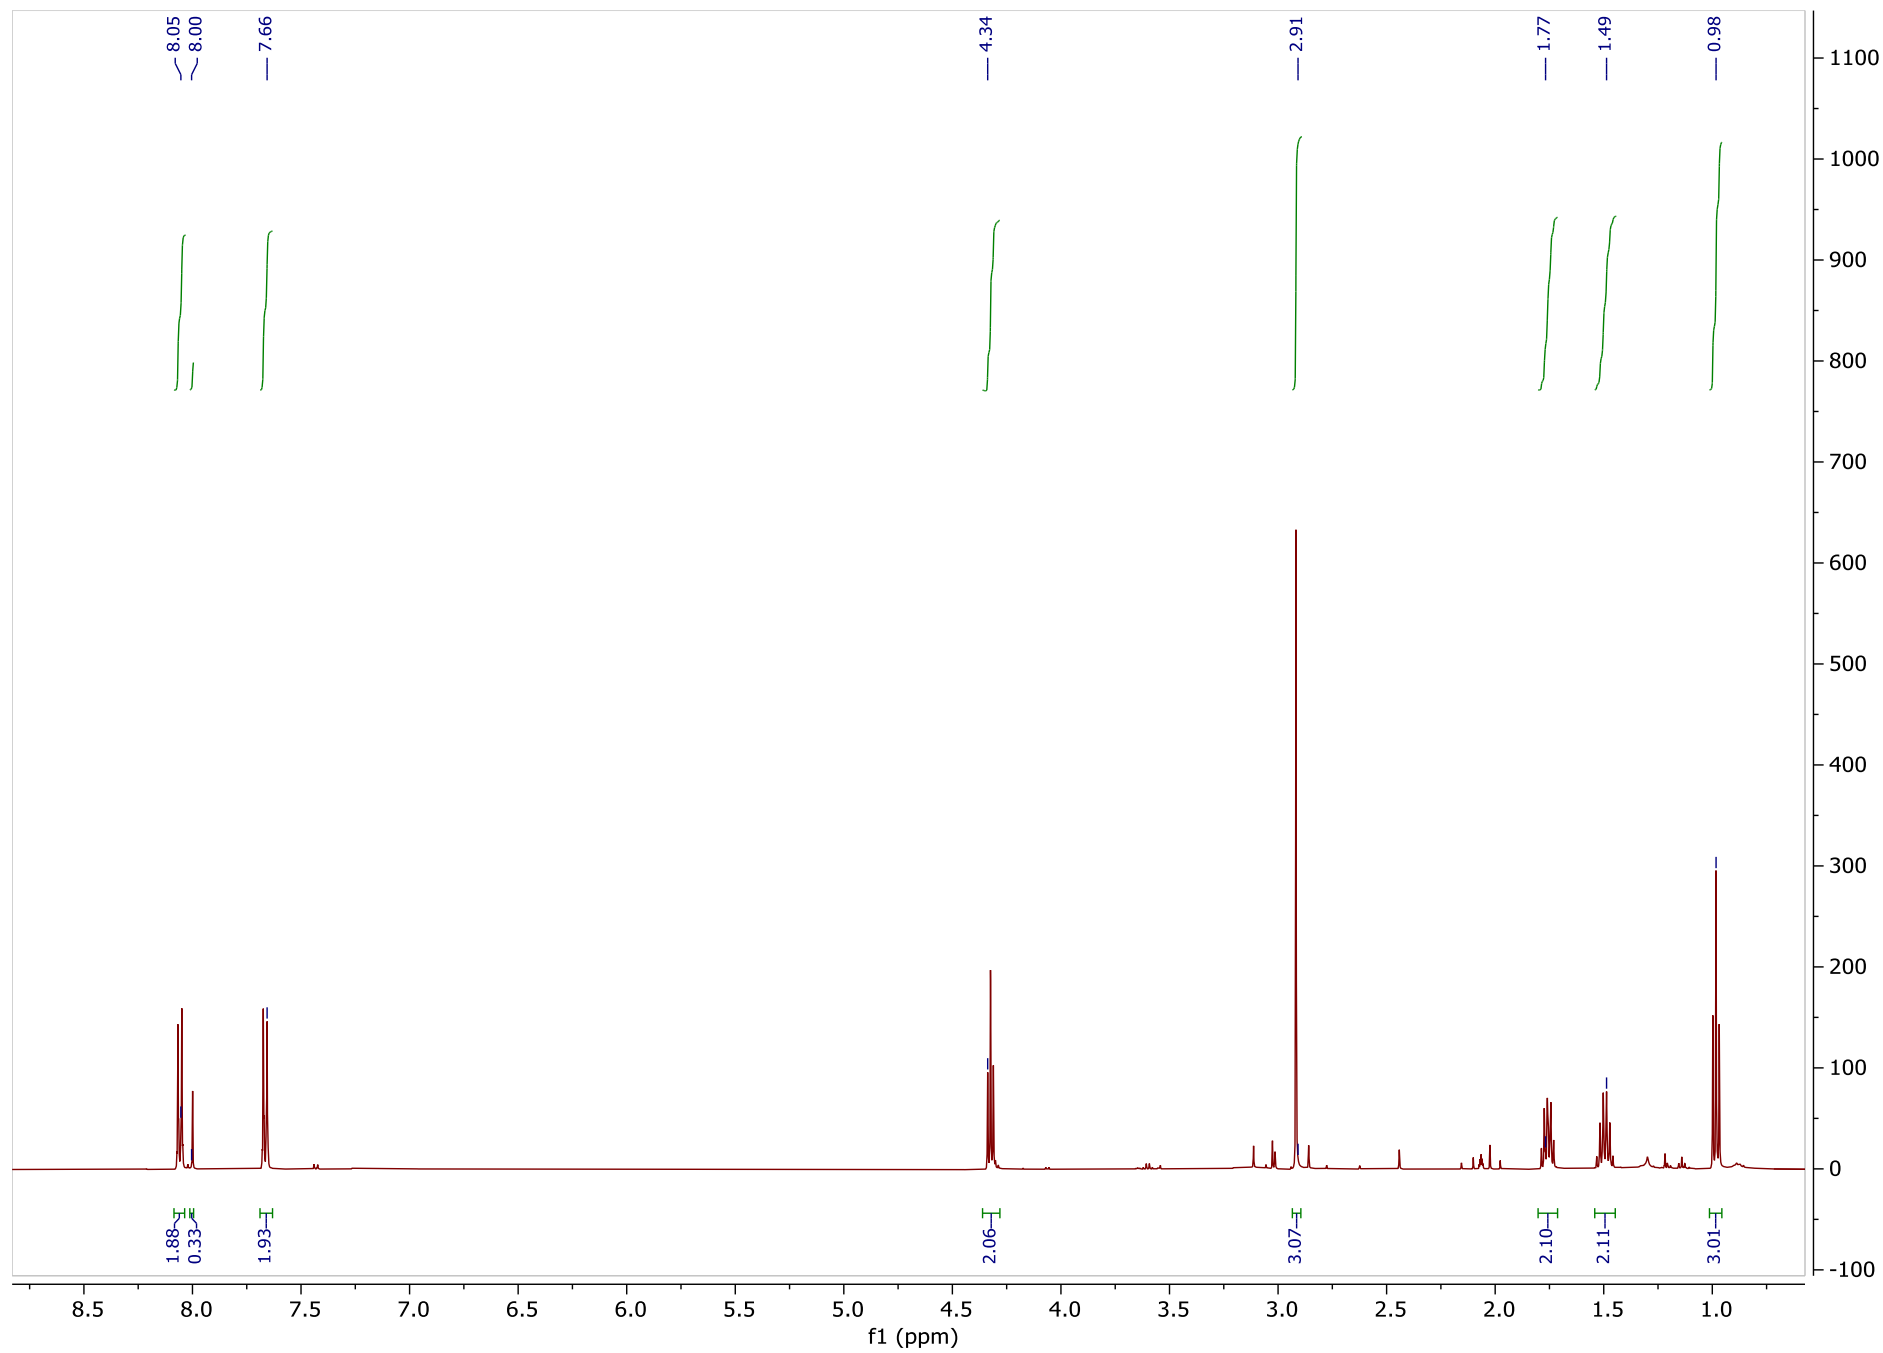

$^{13}\text{C}$  NMR of 3w, acetone, 126 MHz

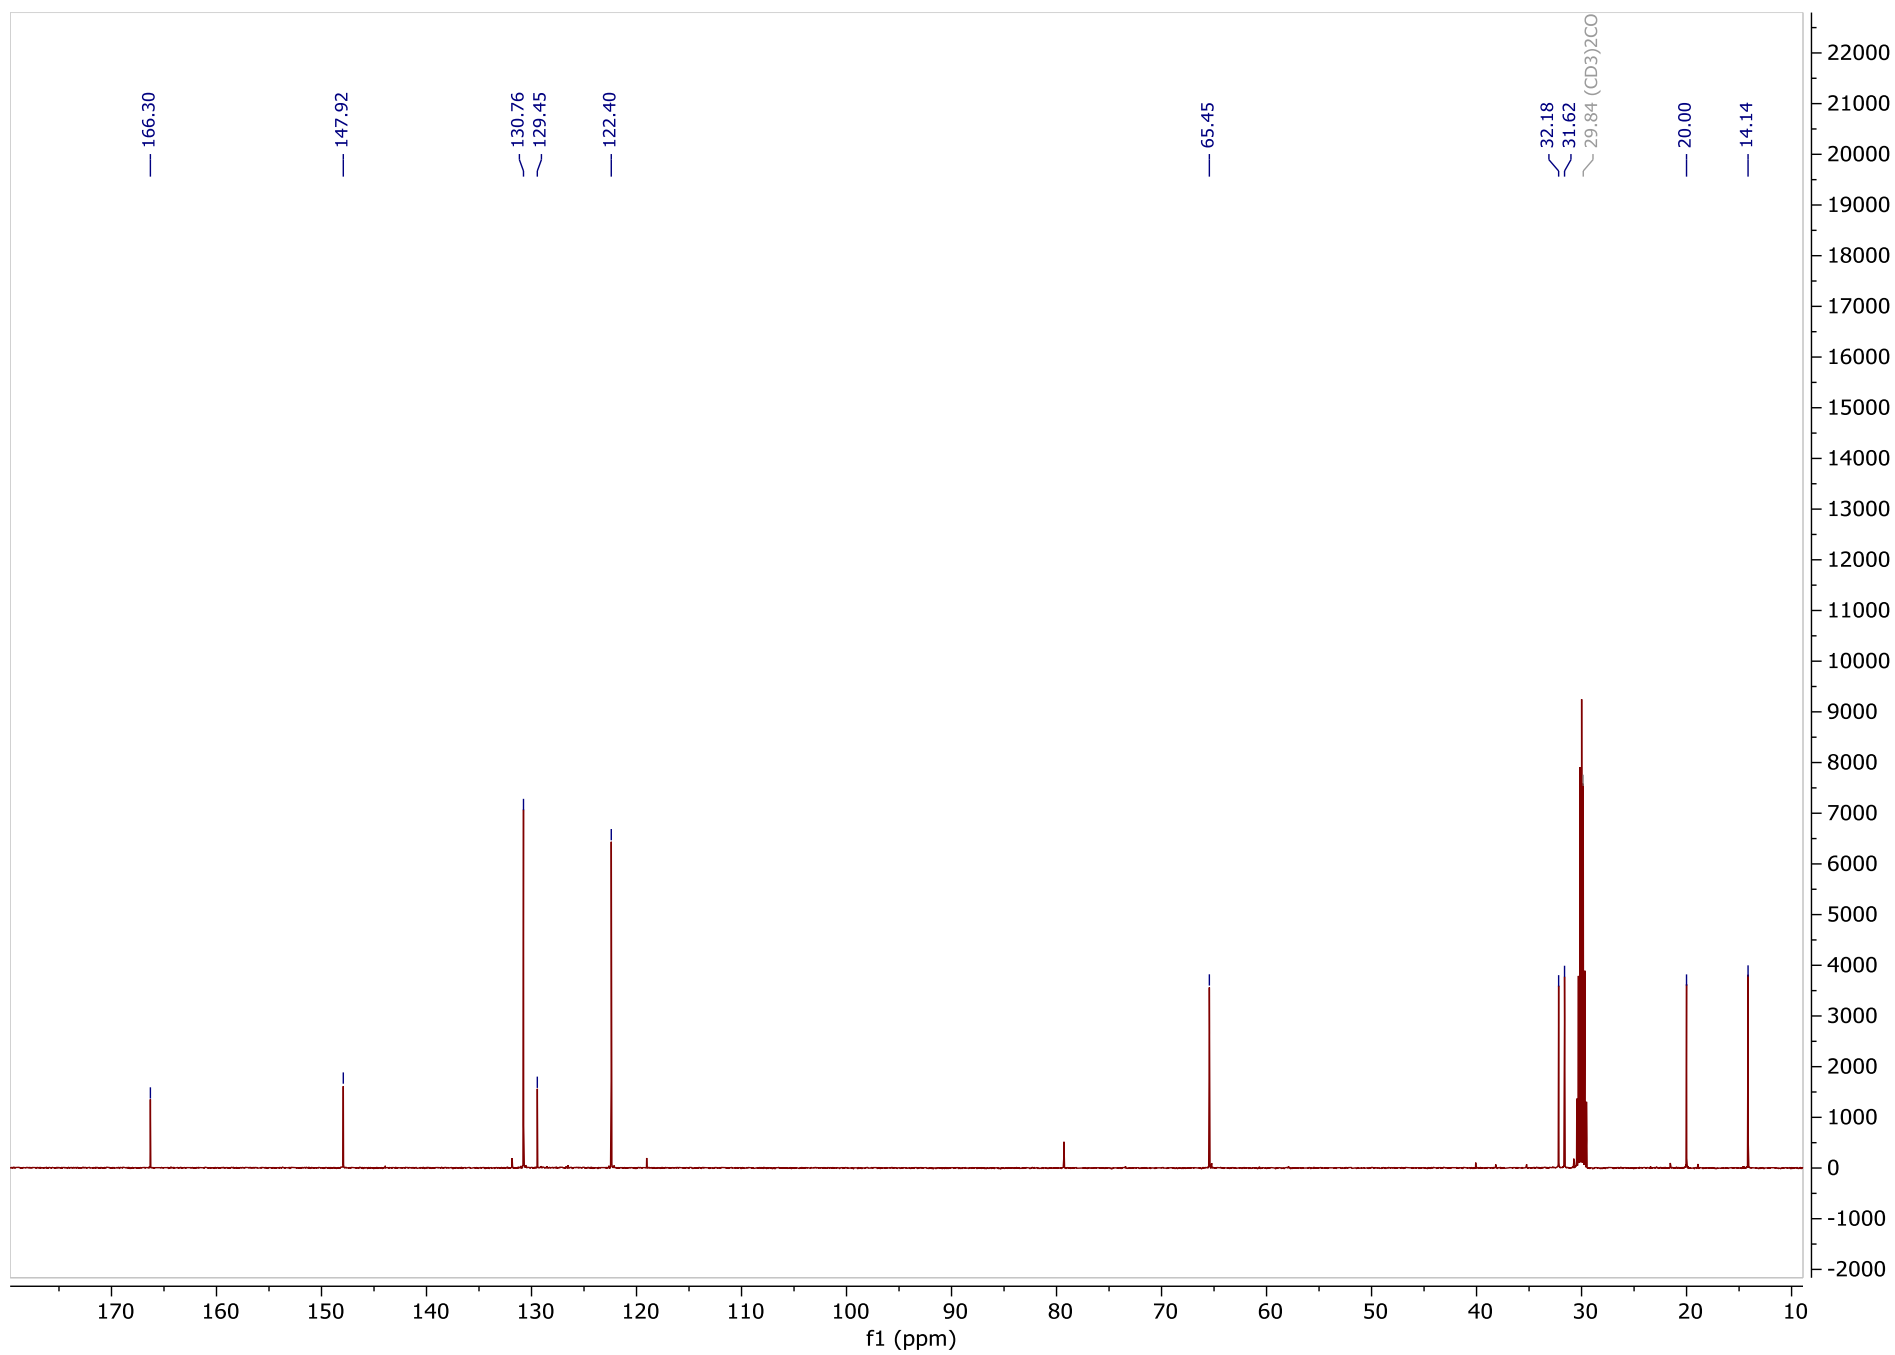

<sup>1</sup>H NMR of 4a, acetone, 500 MHz

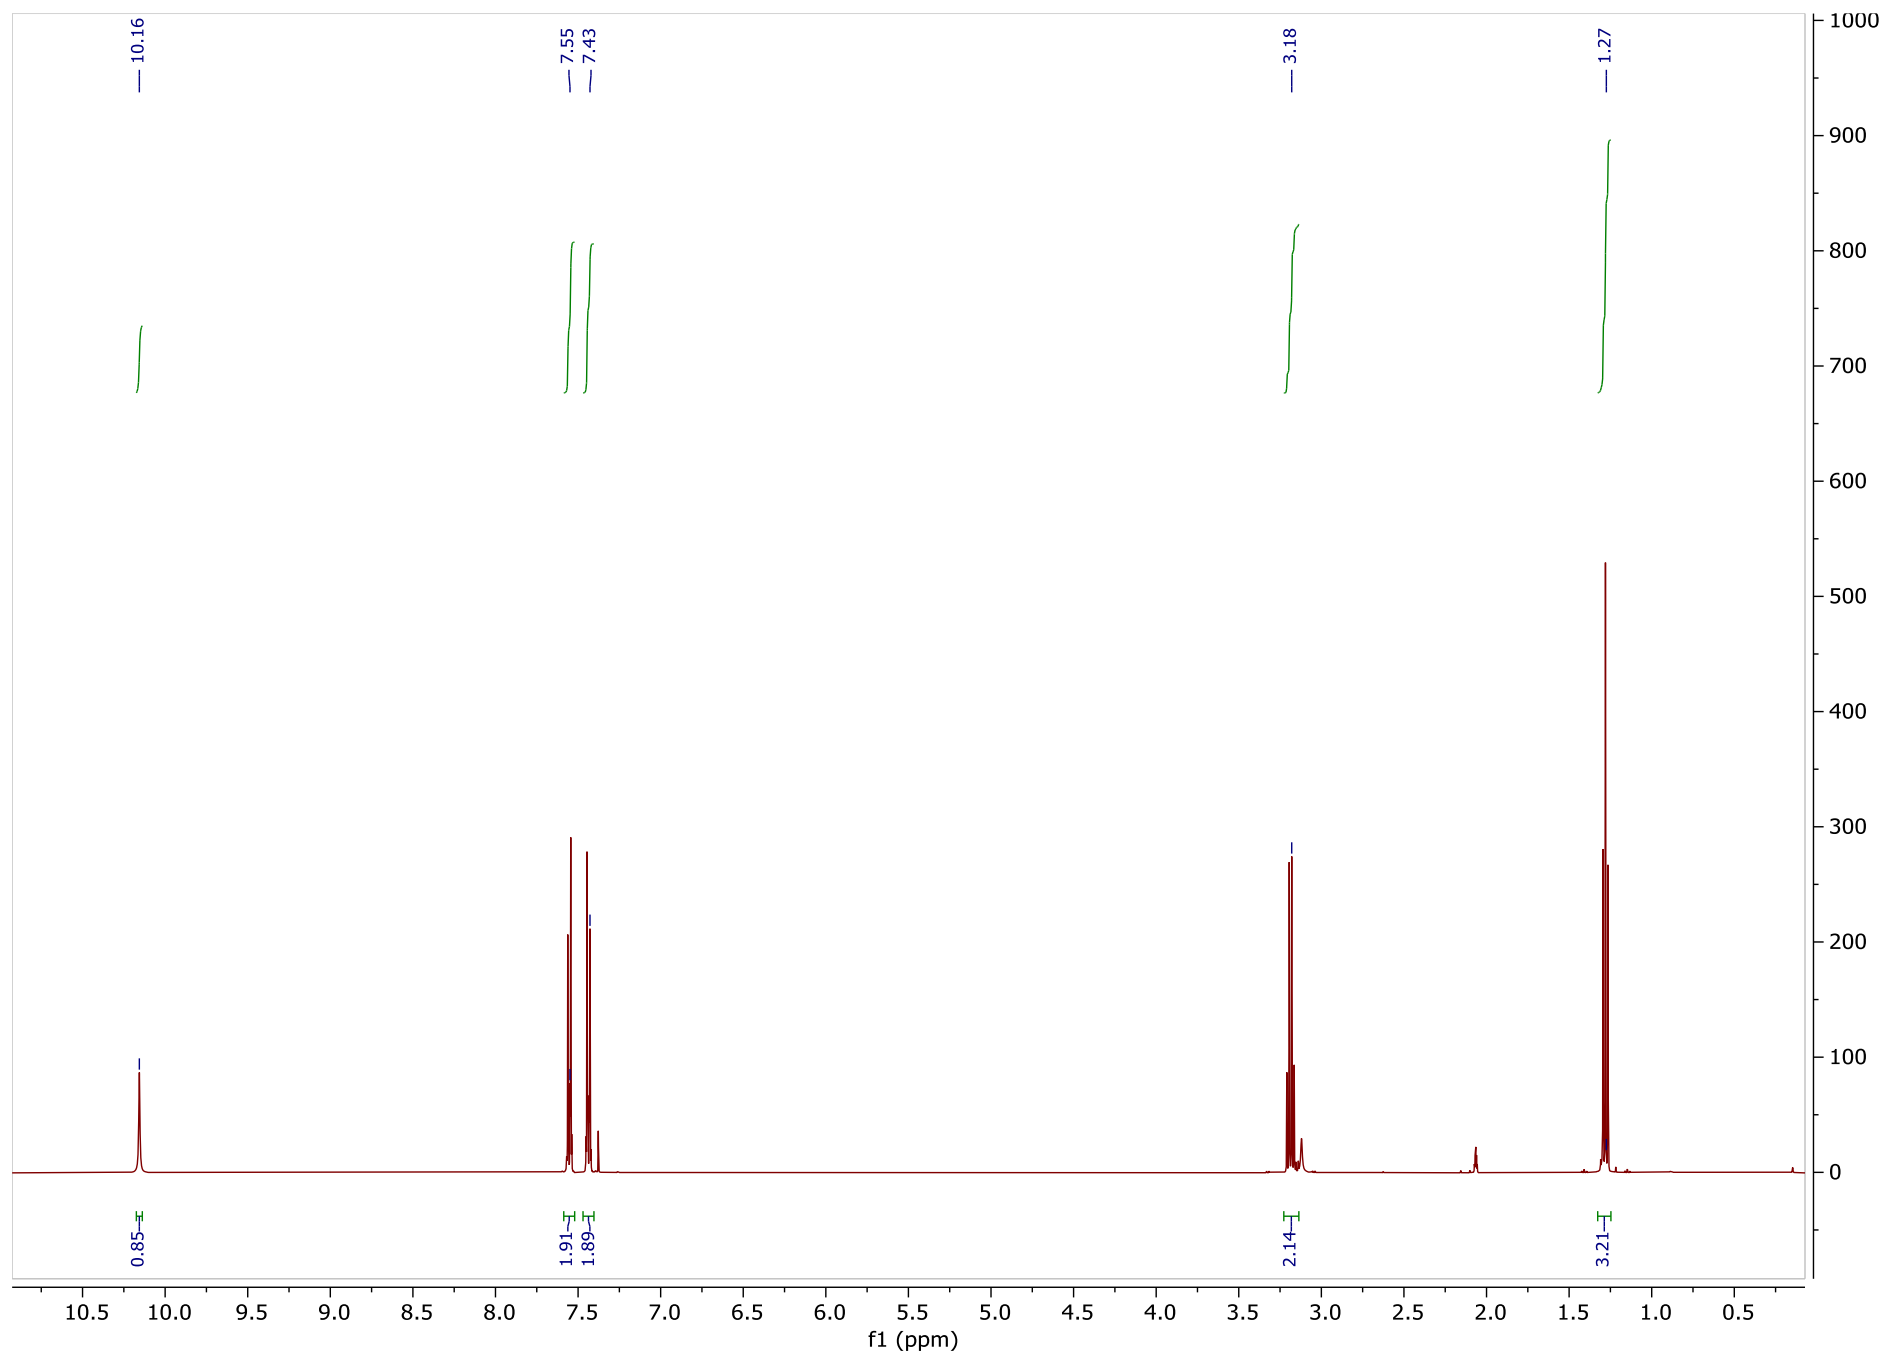

<sup>13</sup>C NMR of 4a, acetone, 126 MHz

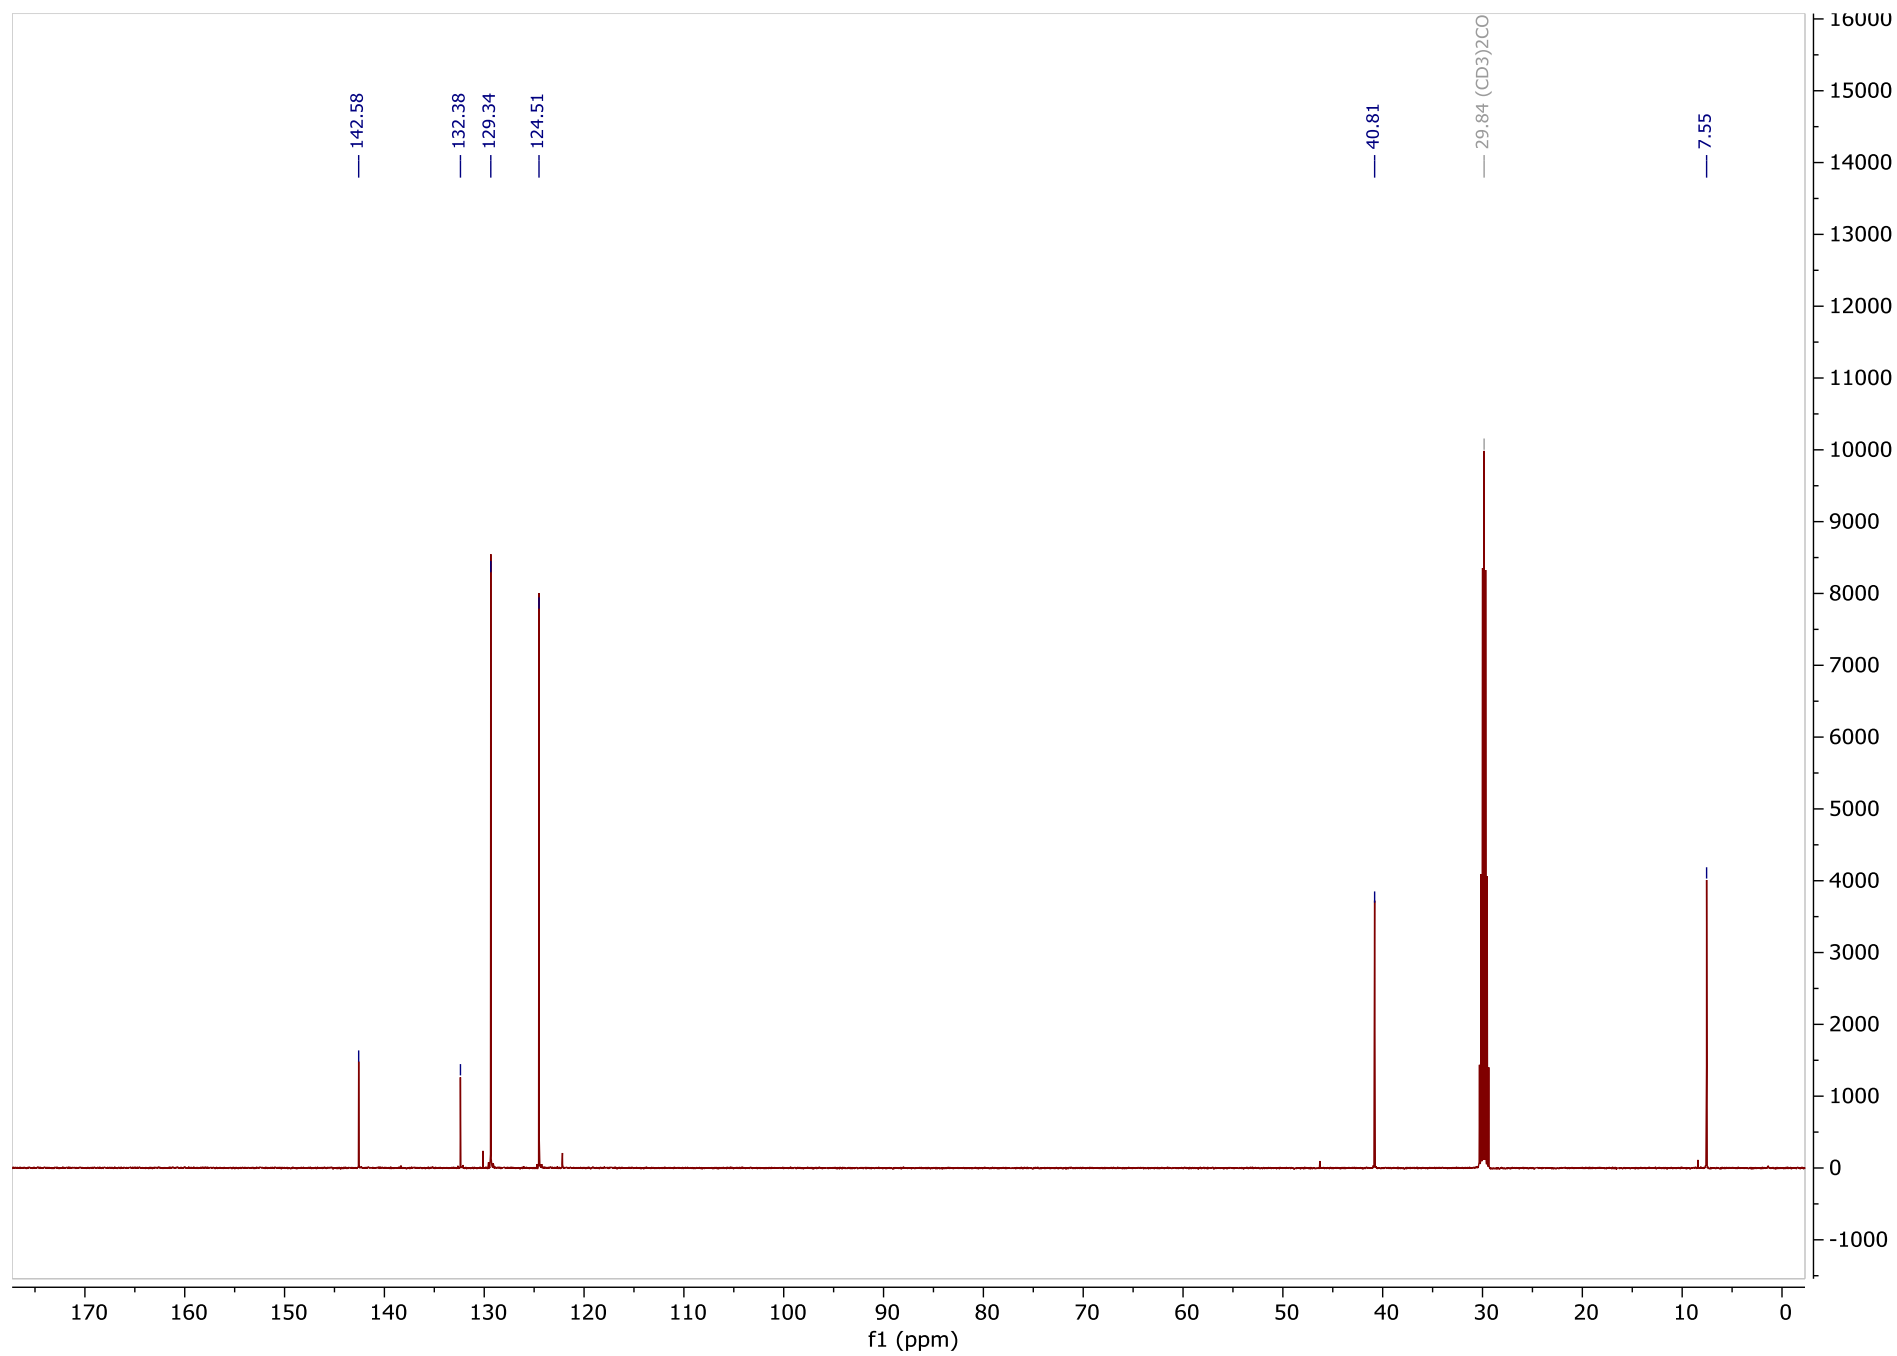



<sup>1</sup>H NMR of 4b, acetone, 500 MHz

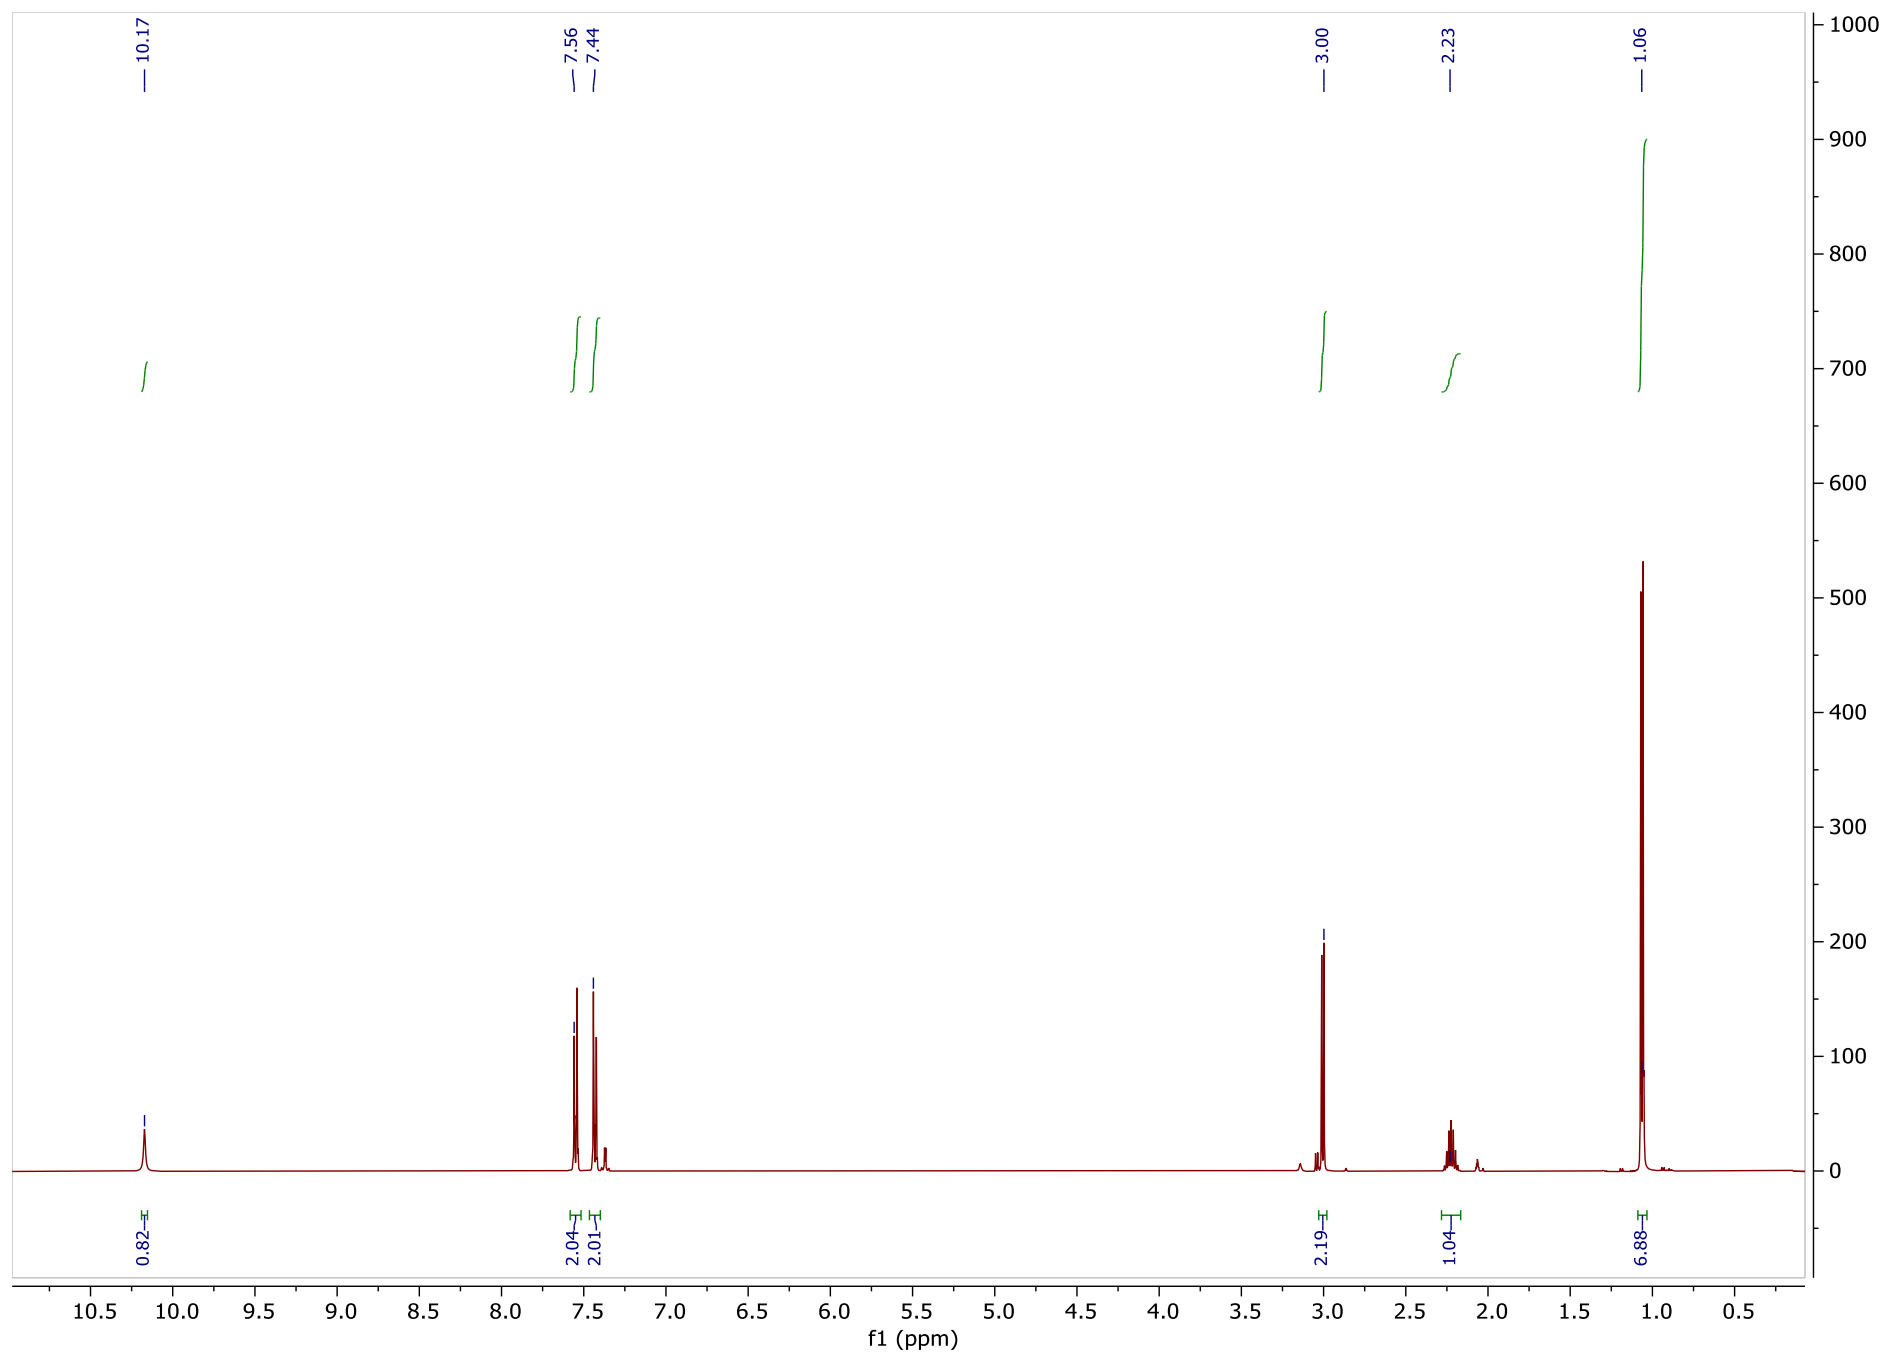

$^{13}\text{C}$  NMR of 4b, acetone, 126 MHz

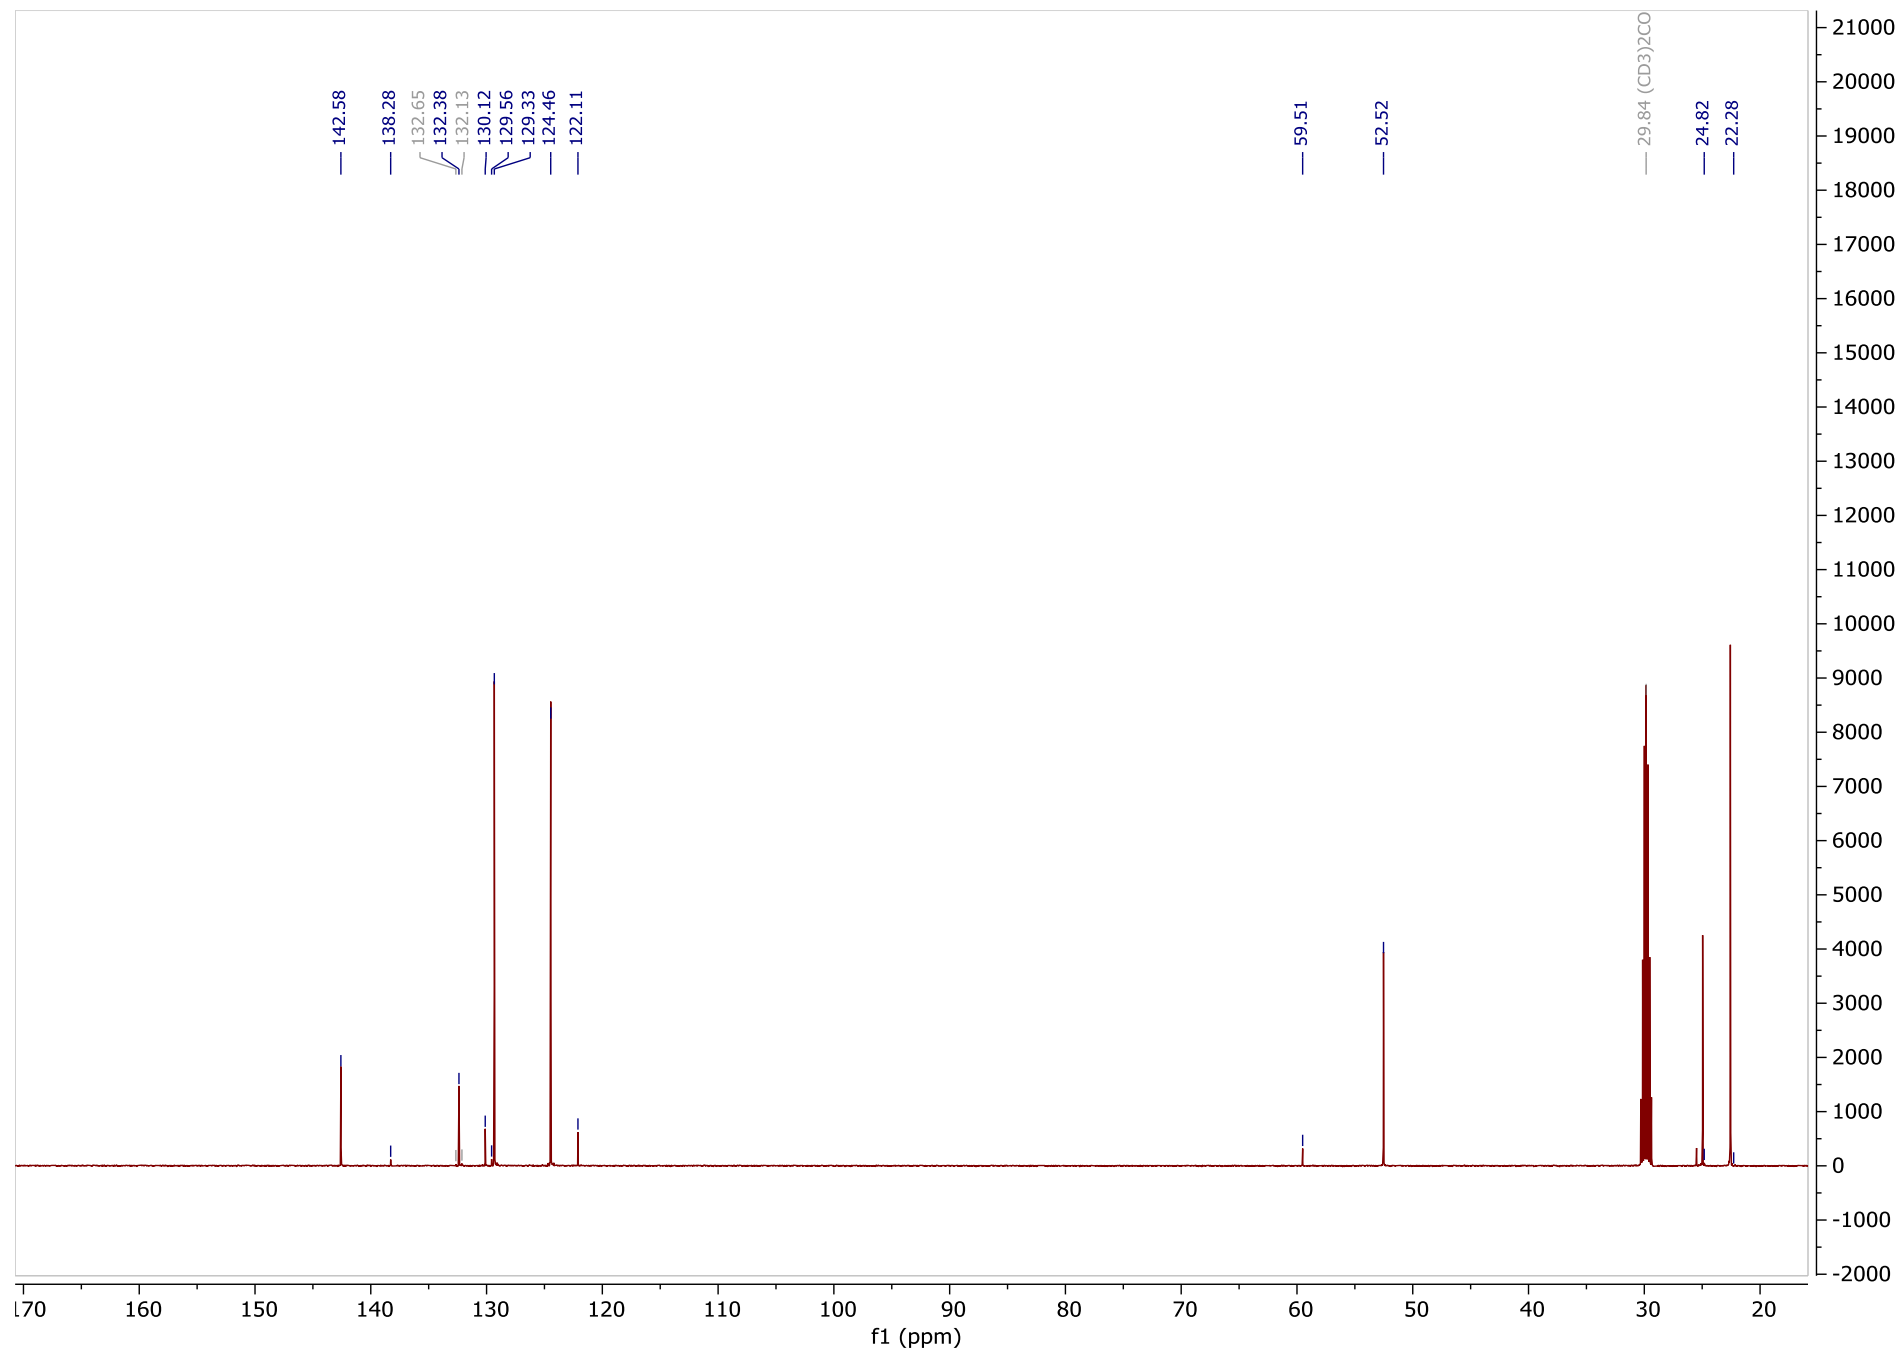

<sup>1</sup>H NMR of 4c, acetone, 500 MHz

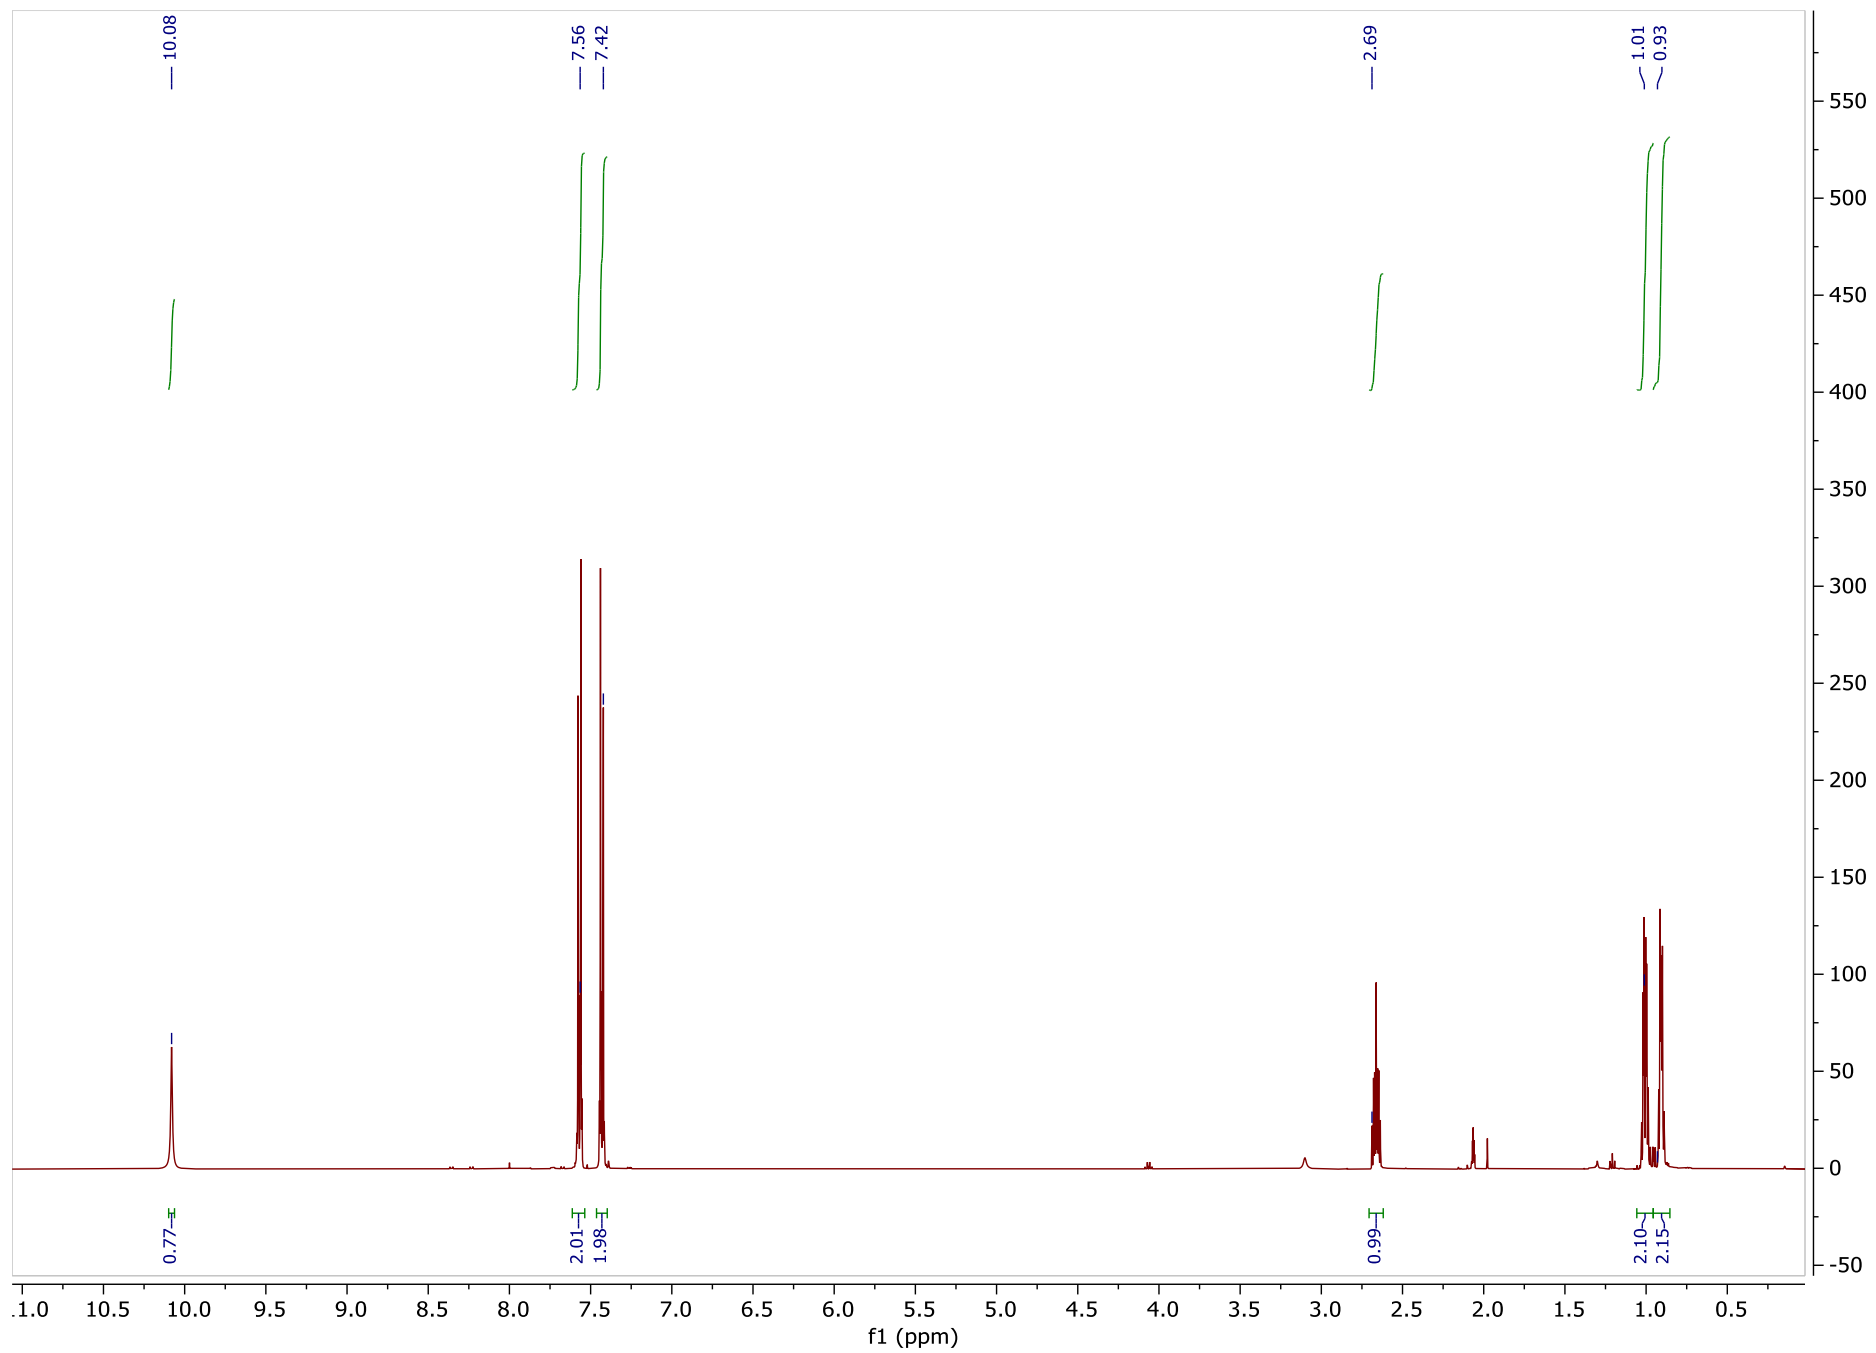

$^{13}\text{C}$  NMR of 4c, acetone, 126 MHz

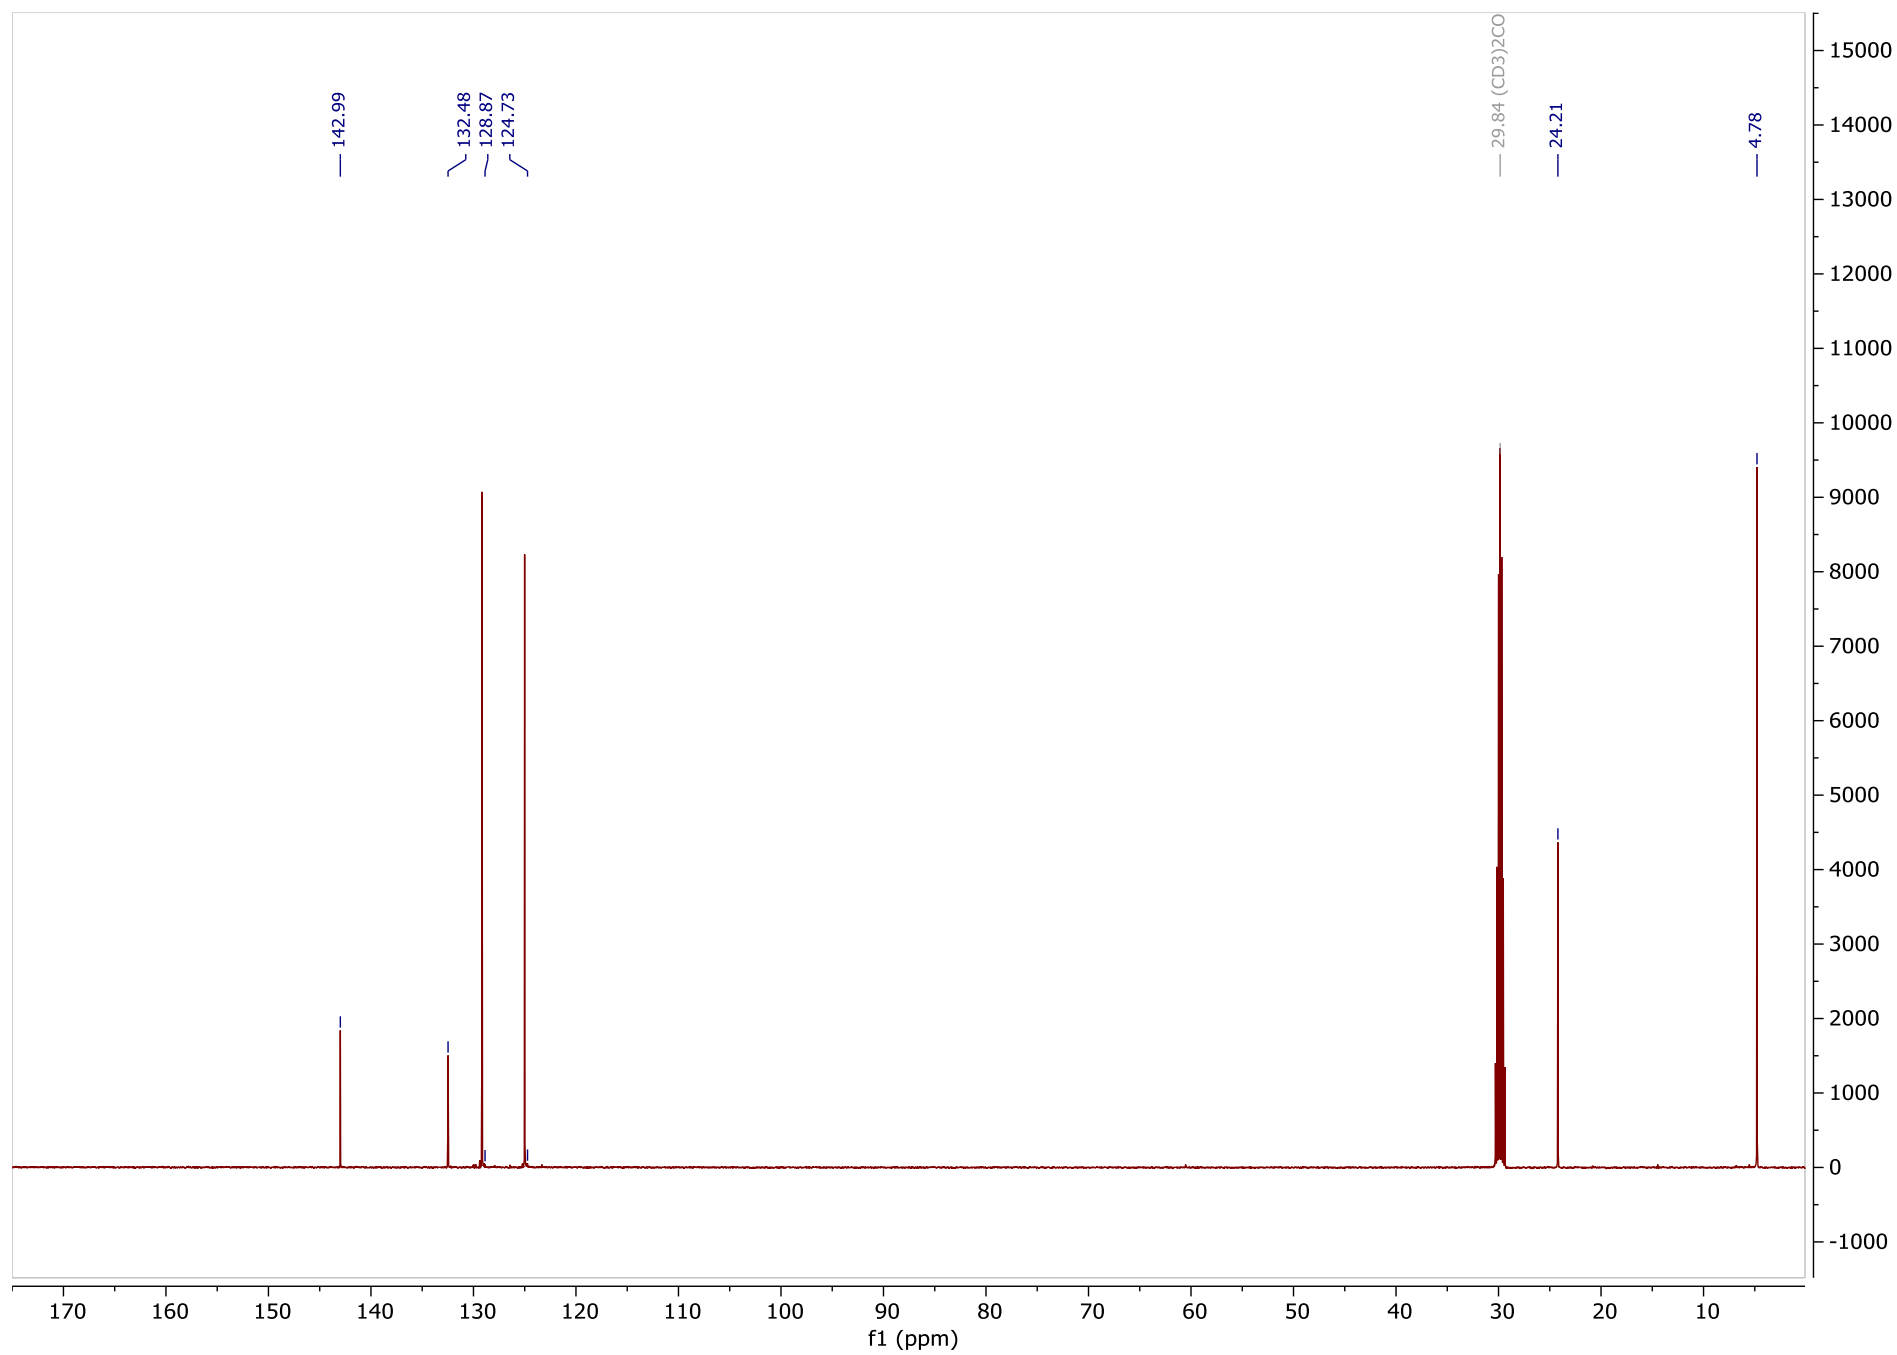

<sup>1</sup>H NMR of 4d, acetone, 500 MHz

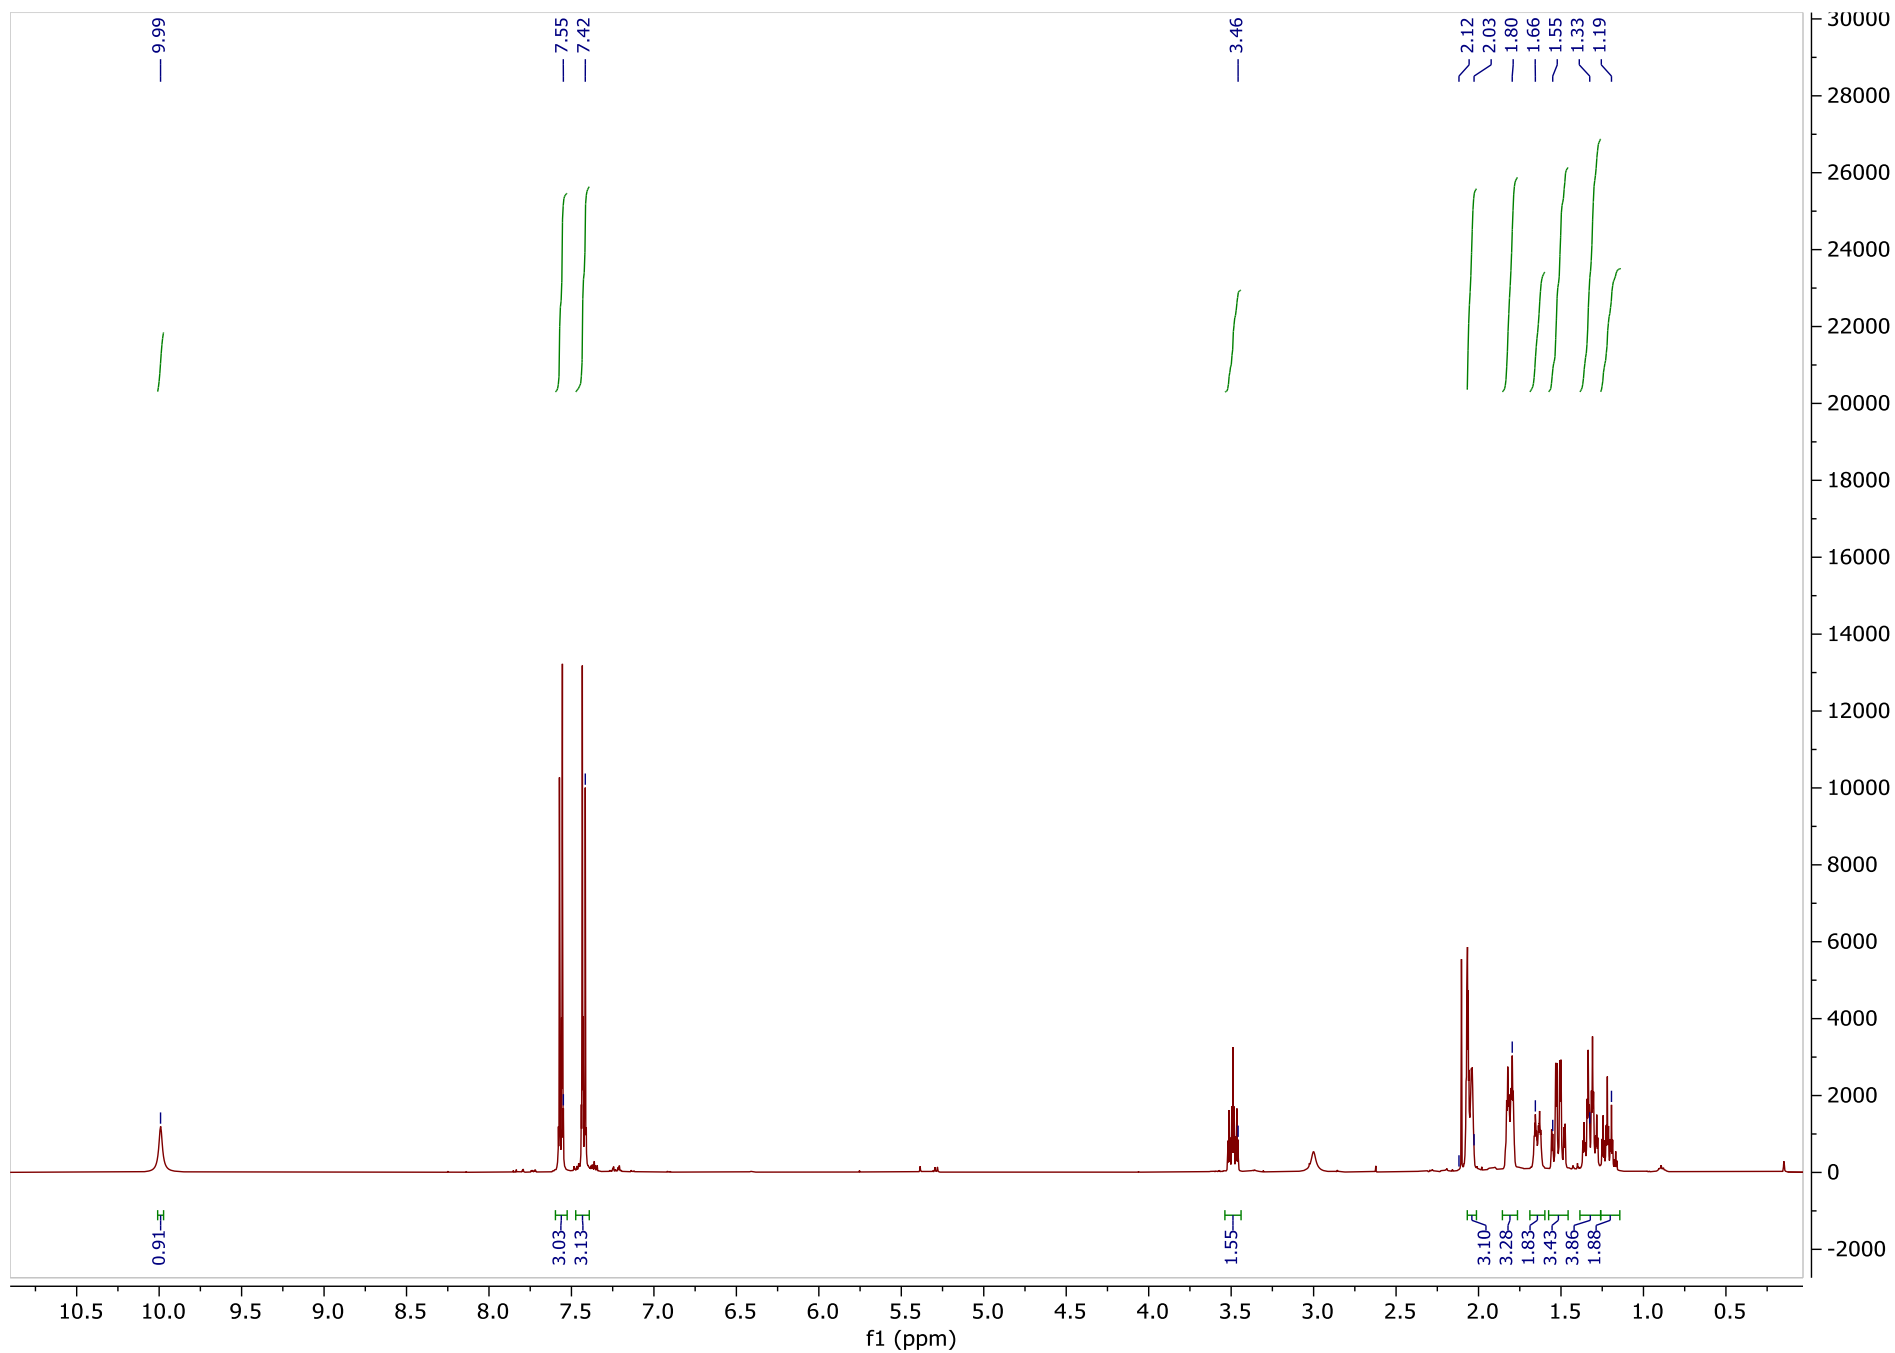

$^{13}\text{C}$  NMR of 4d, acetone, 126 MHz

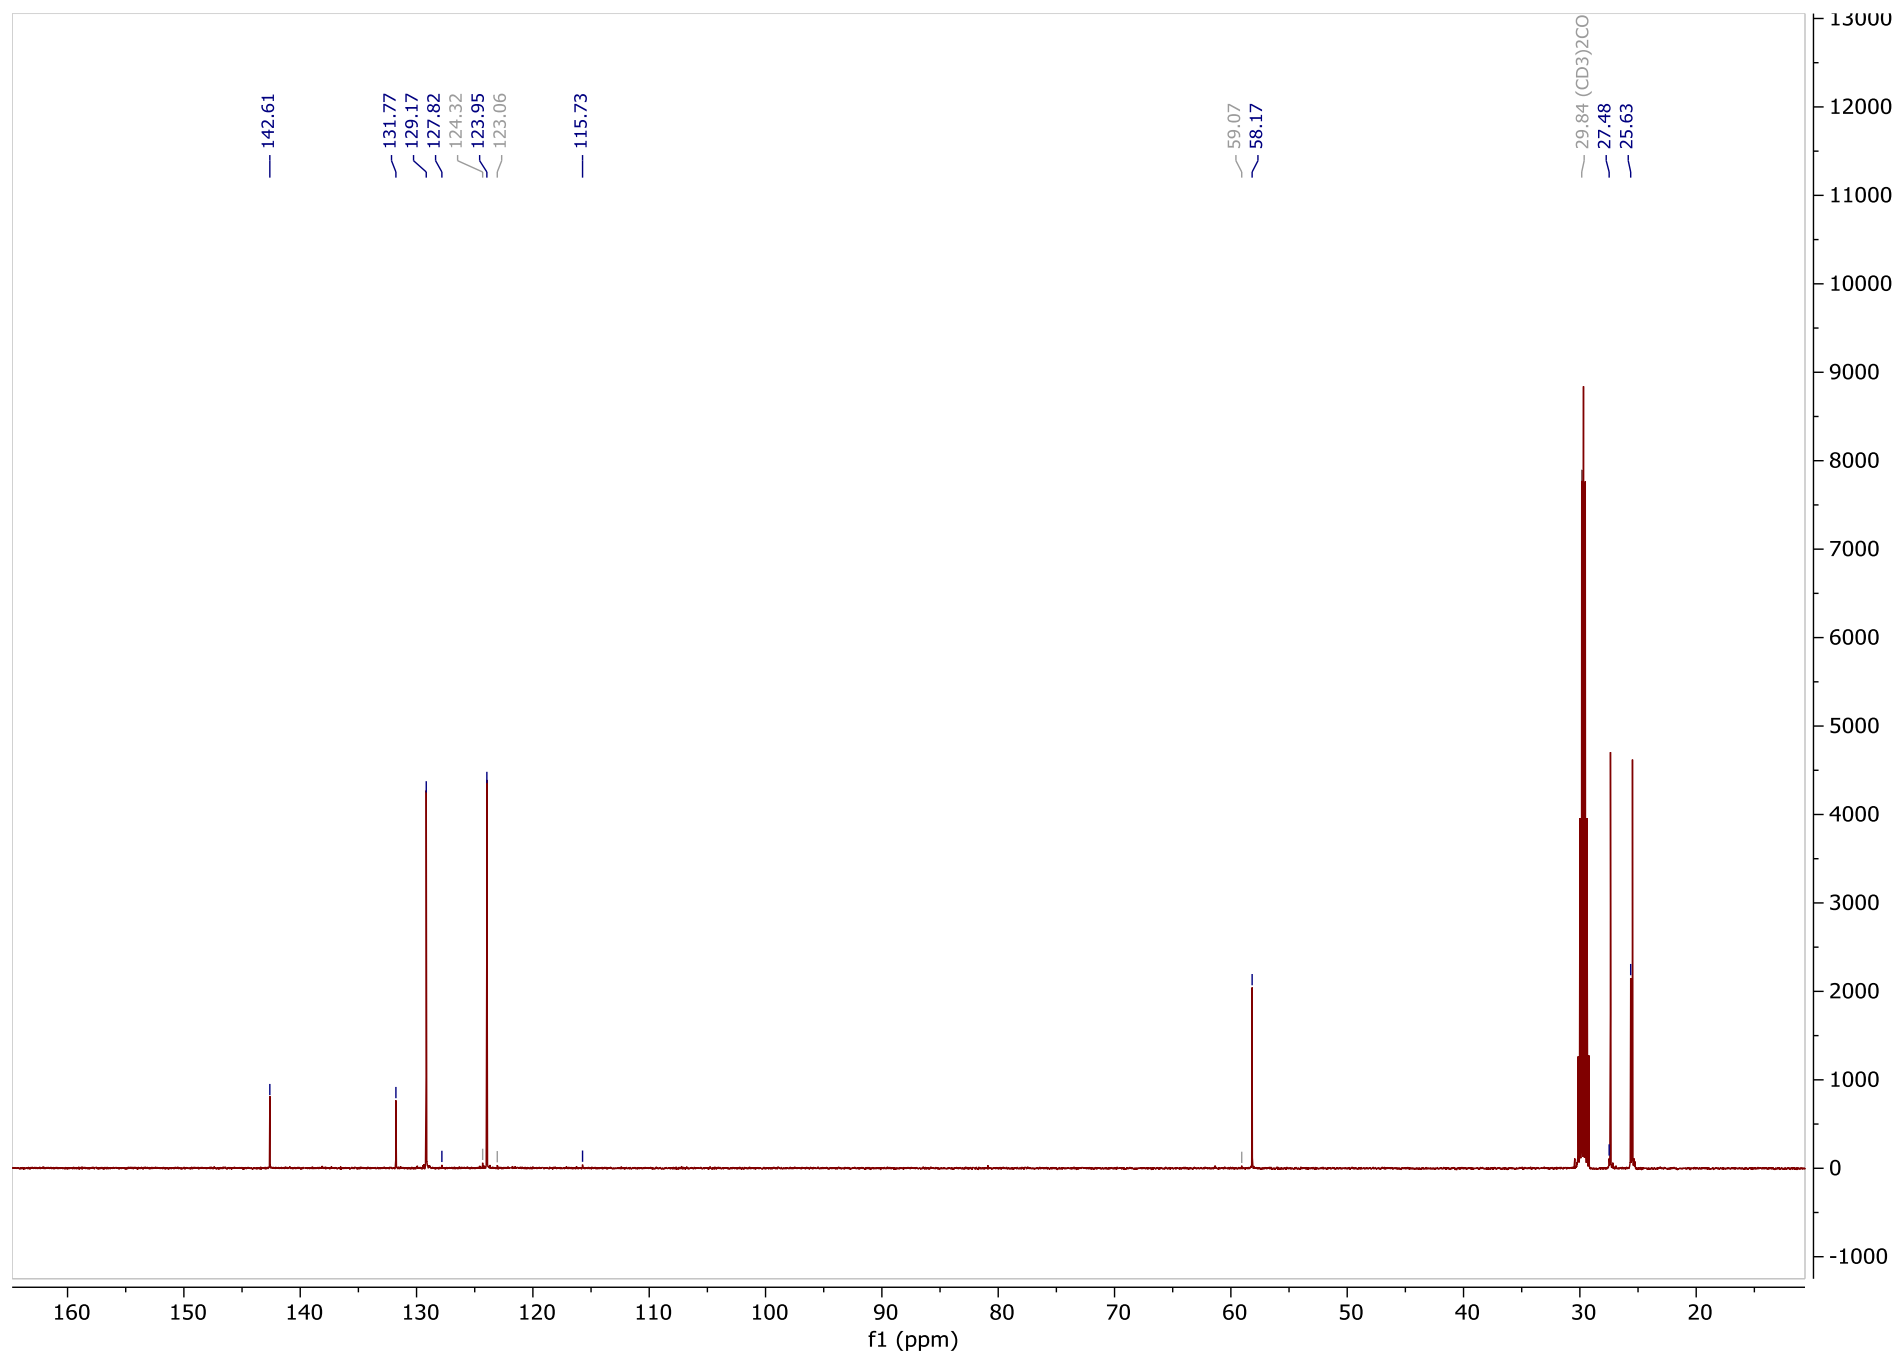

$^1\text{H}$  NMR of 4e, acetone, 500 MHz

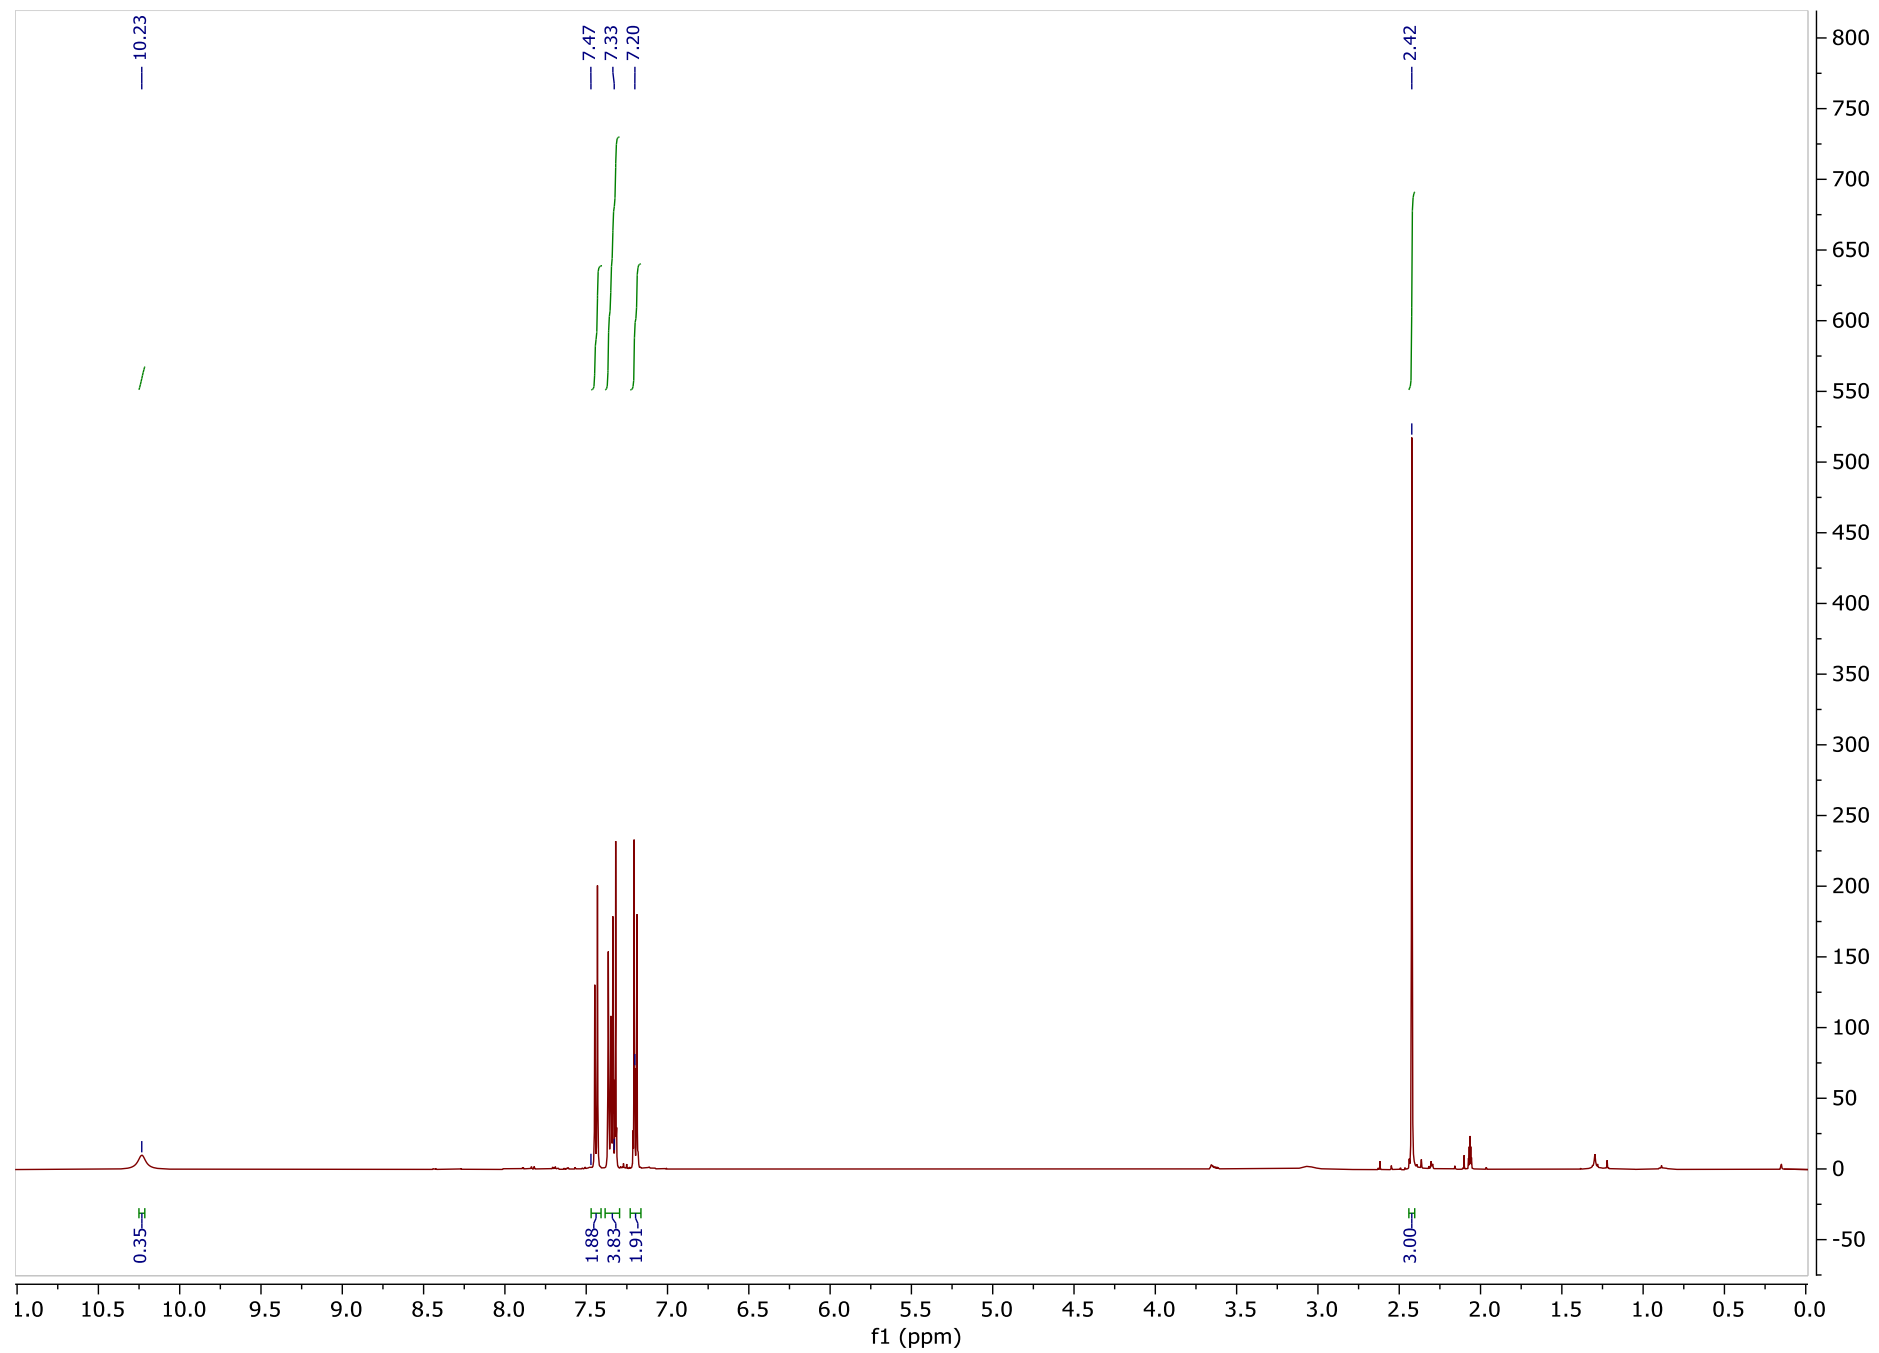

$^{13}\text{C}$  NMR of 4e, acetone, 126 MHz

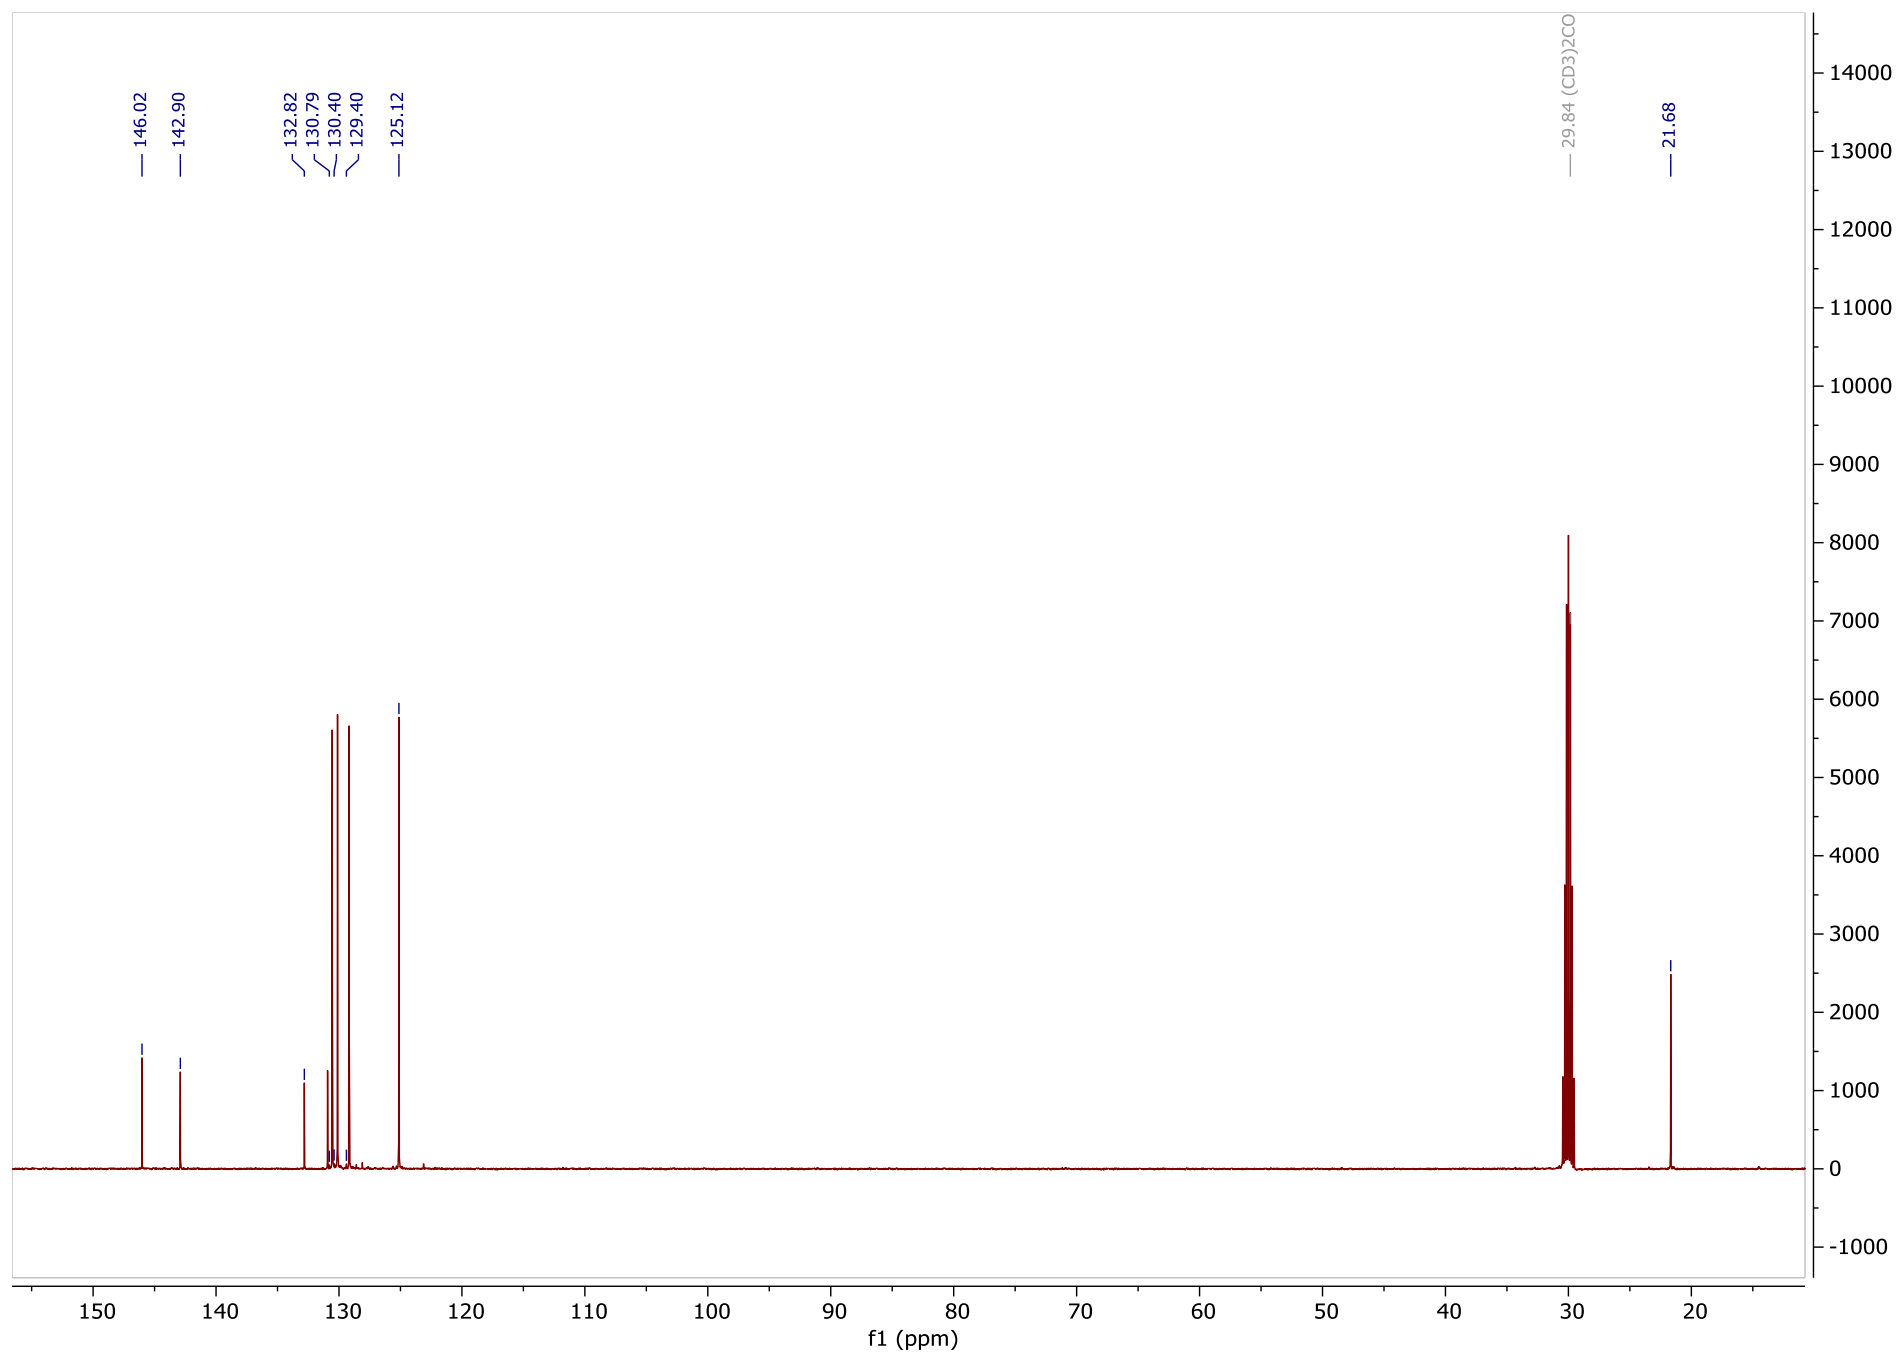



<sup>1</sup>H NMR of 4f, acetone, 500 MHz

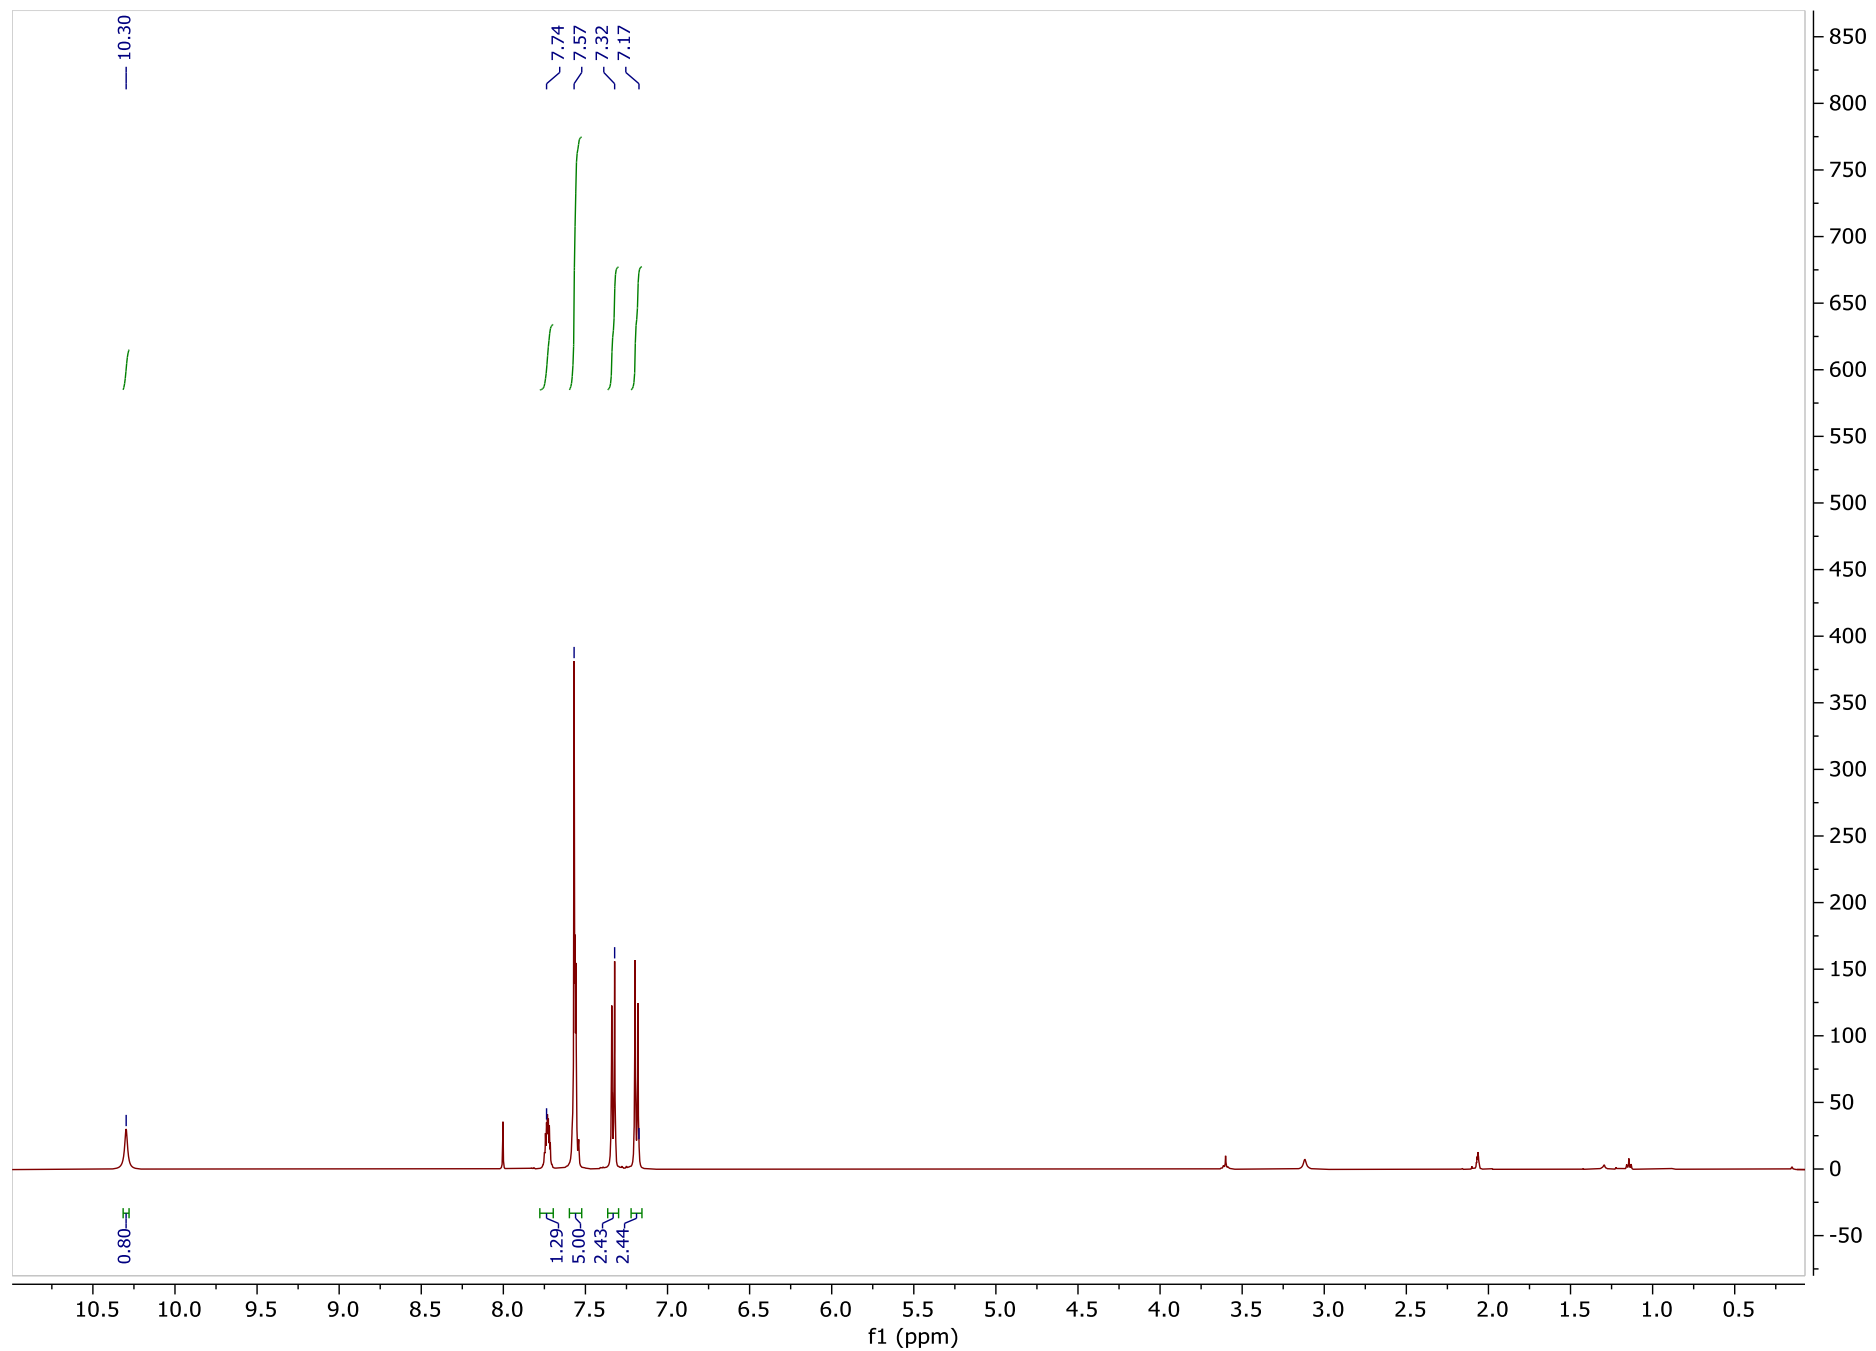

$^{13}\text{C}$  NMR of 4f, acetone, 126 MHz

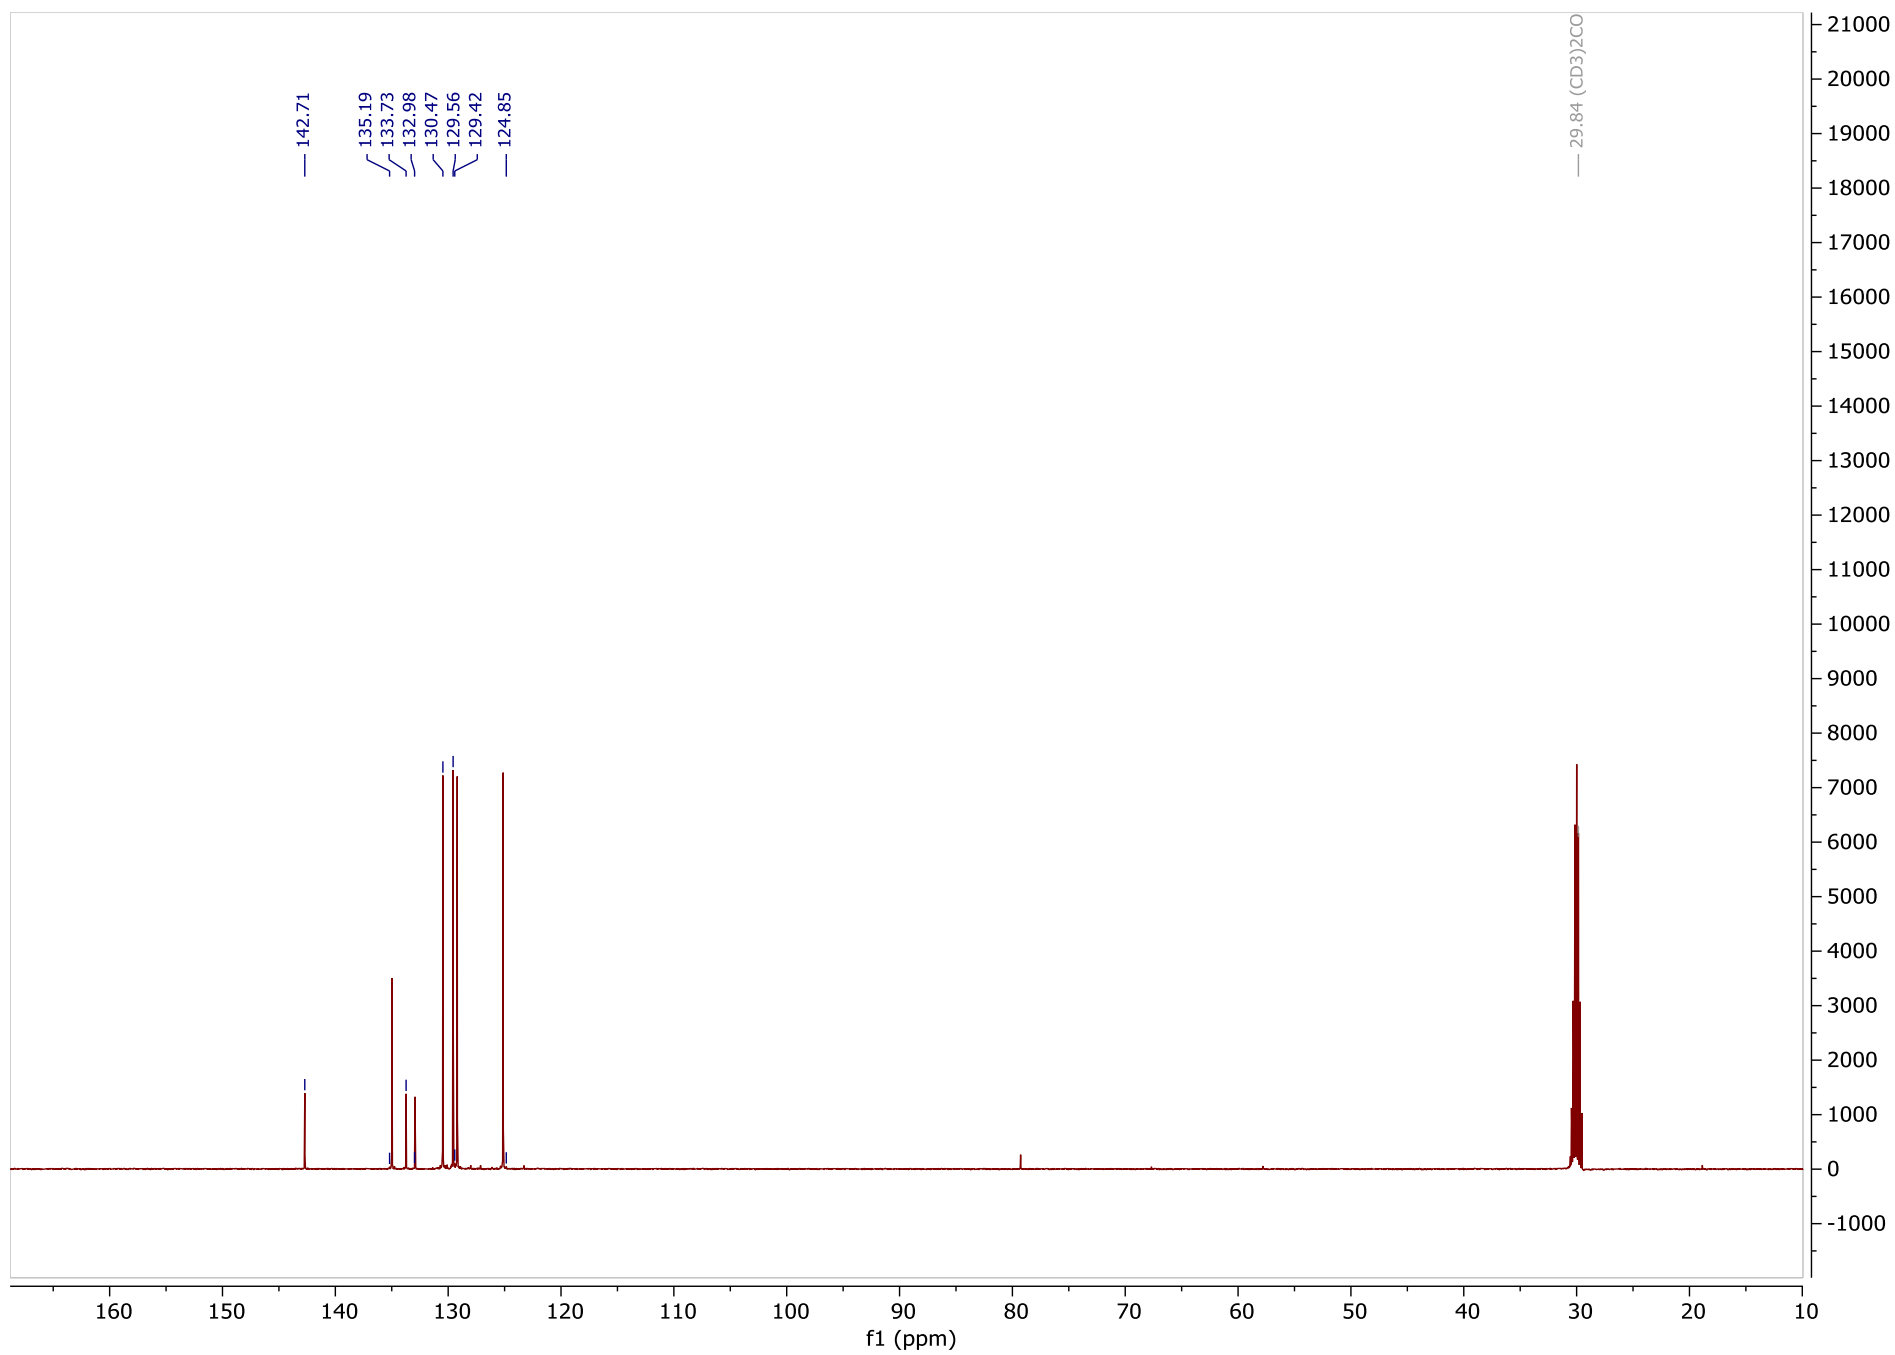

<sup>1</sup>H NMR of 4g, acetone, 500 MHz

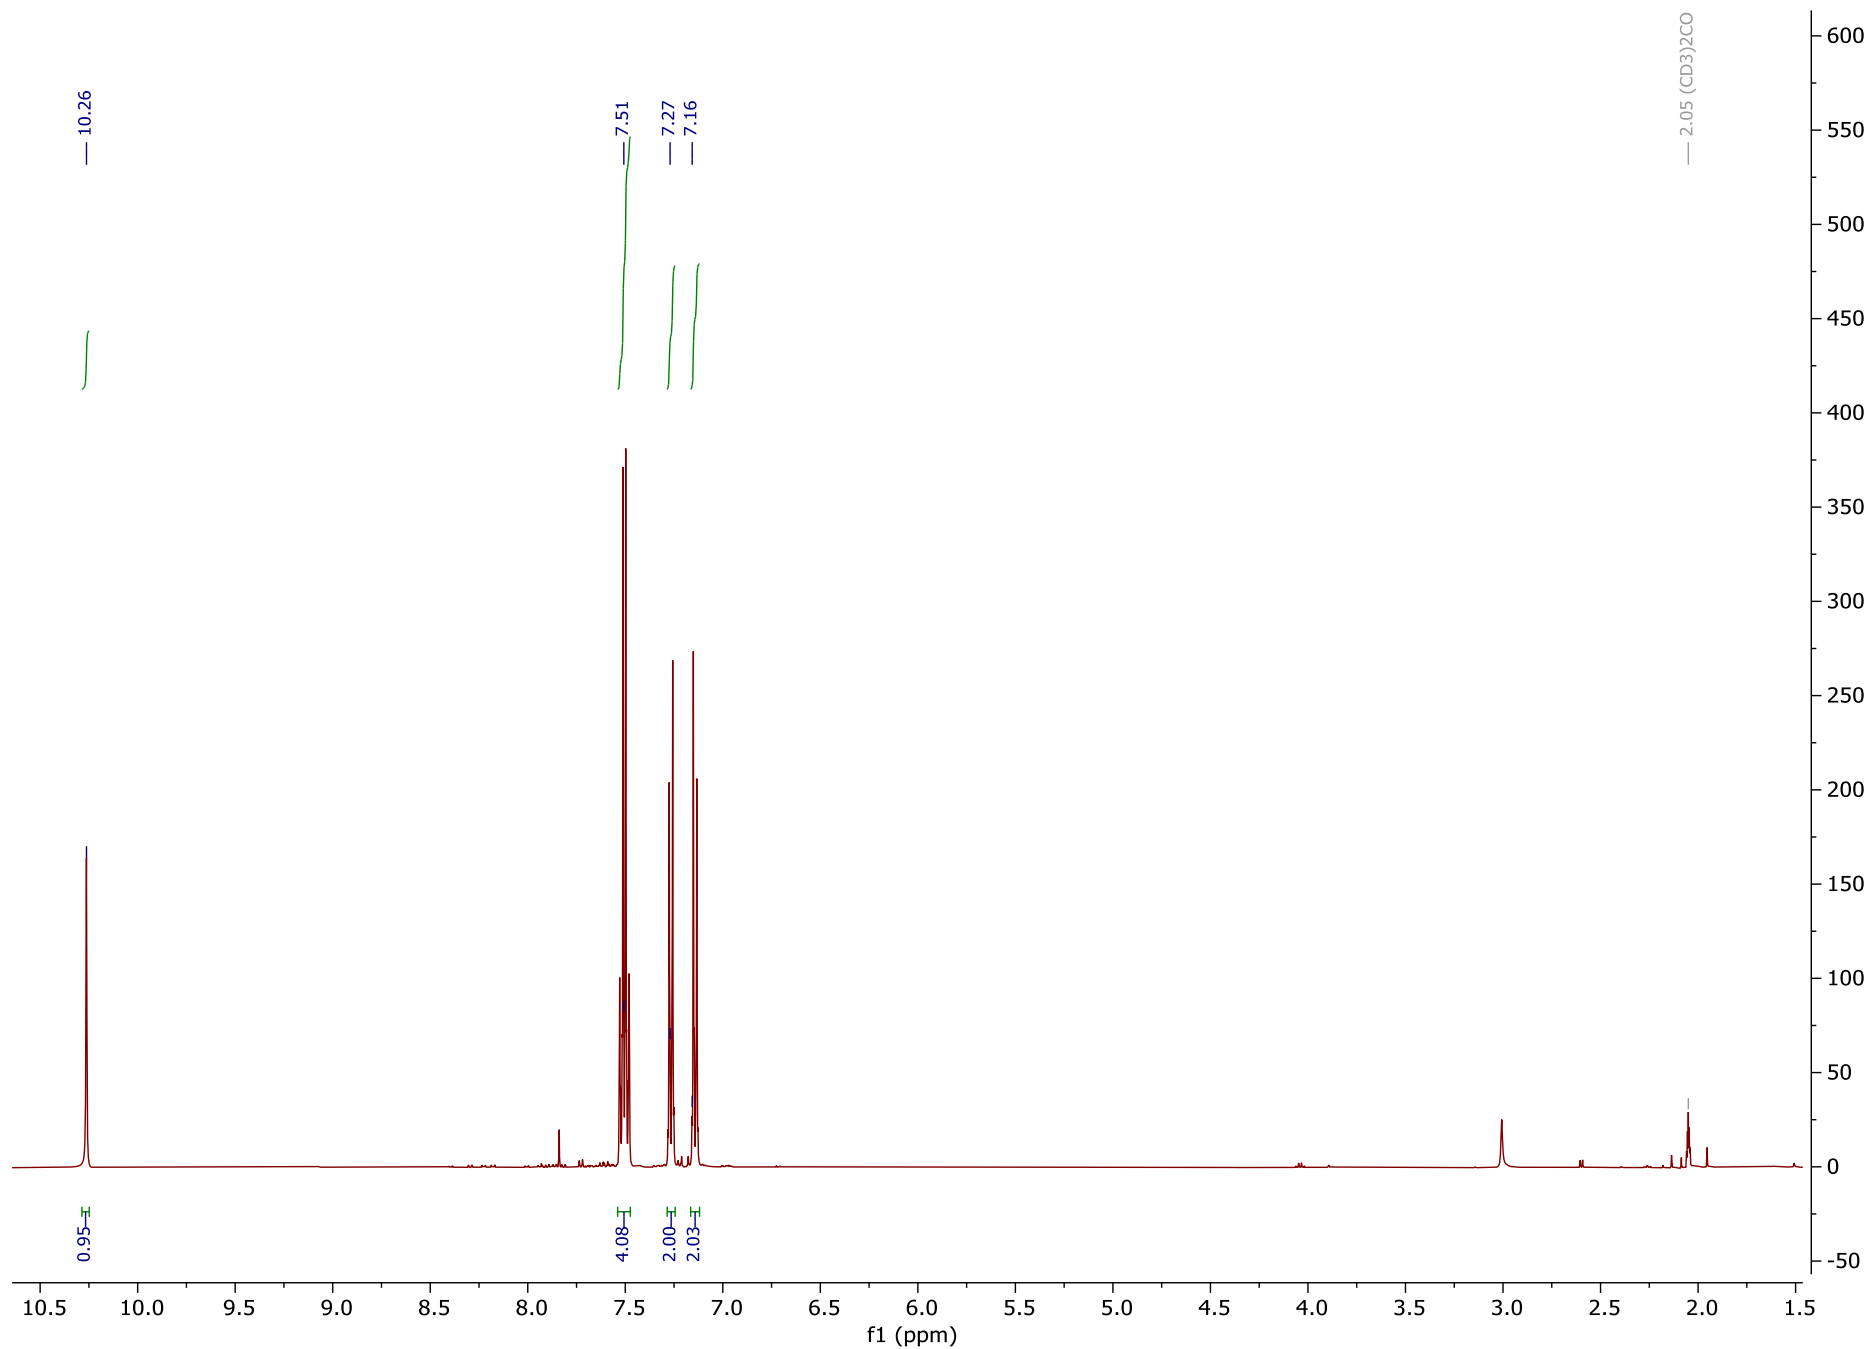

$^{13}\text{C}$  NMR of 4g, acetone/ $\text{CDCl}_3$ , 126 MHz

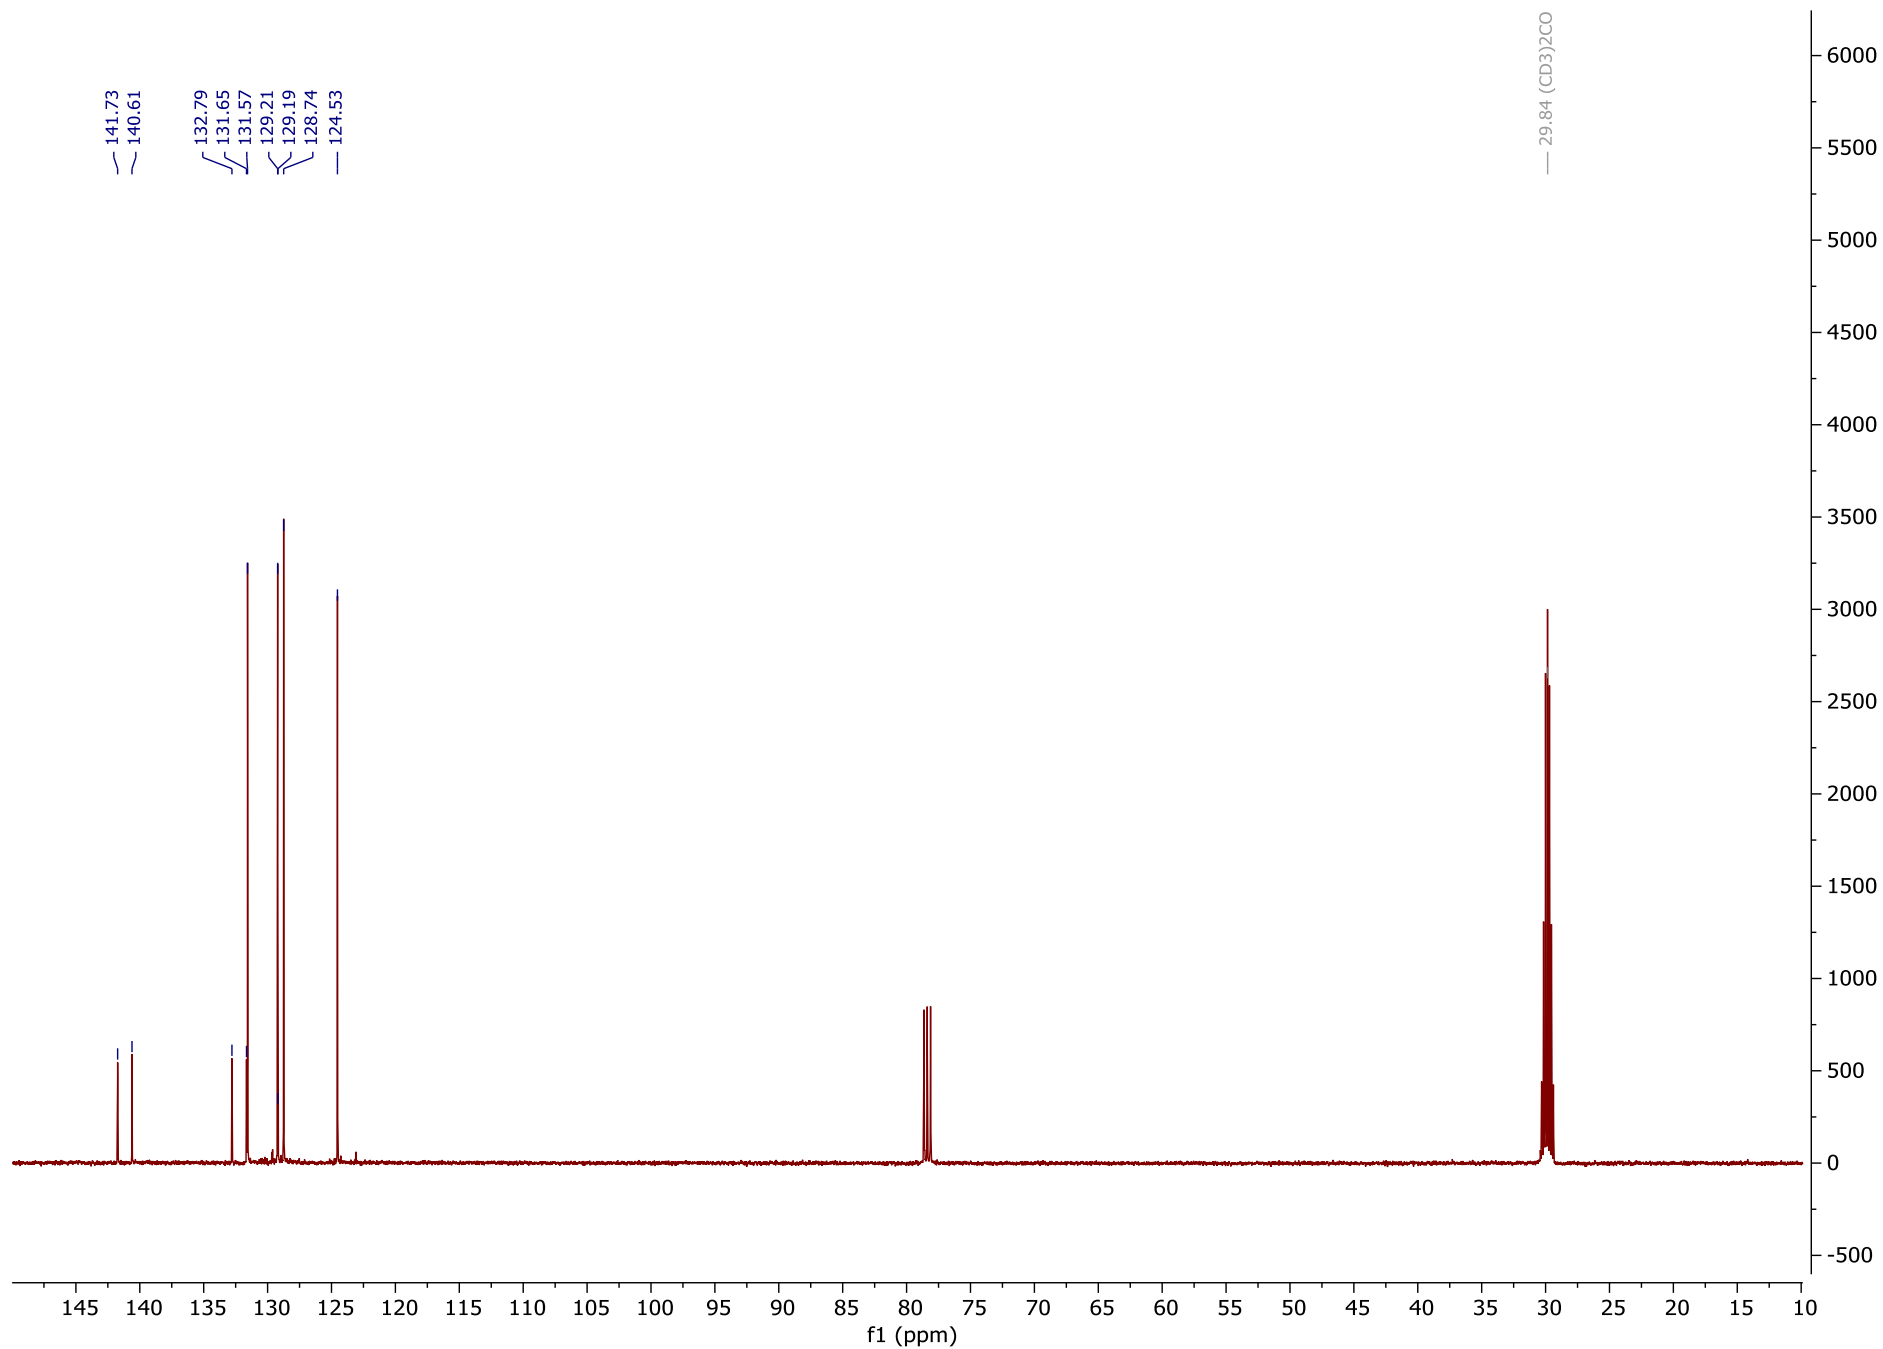

<sup>1</sup>H NMR of 4h, acetone, 500 MHz

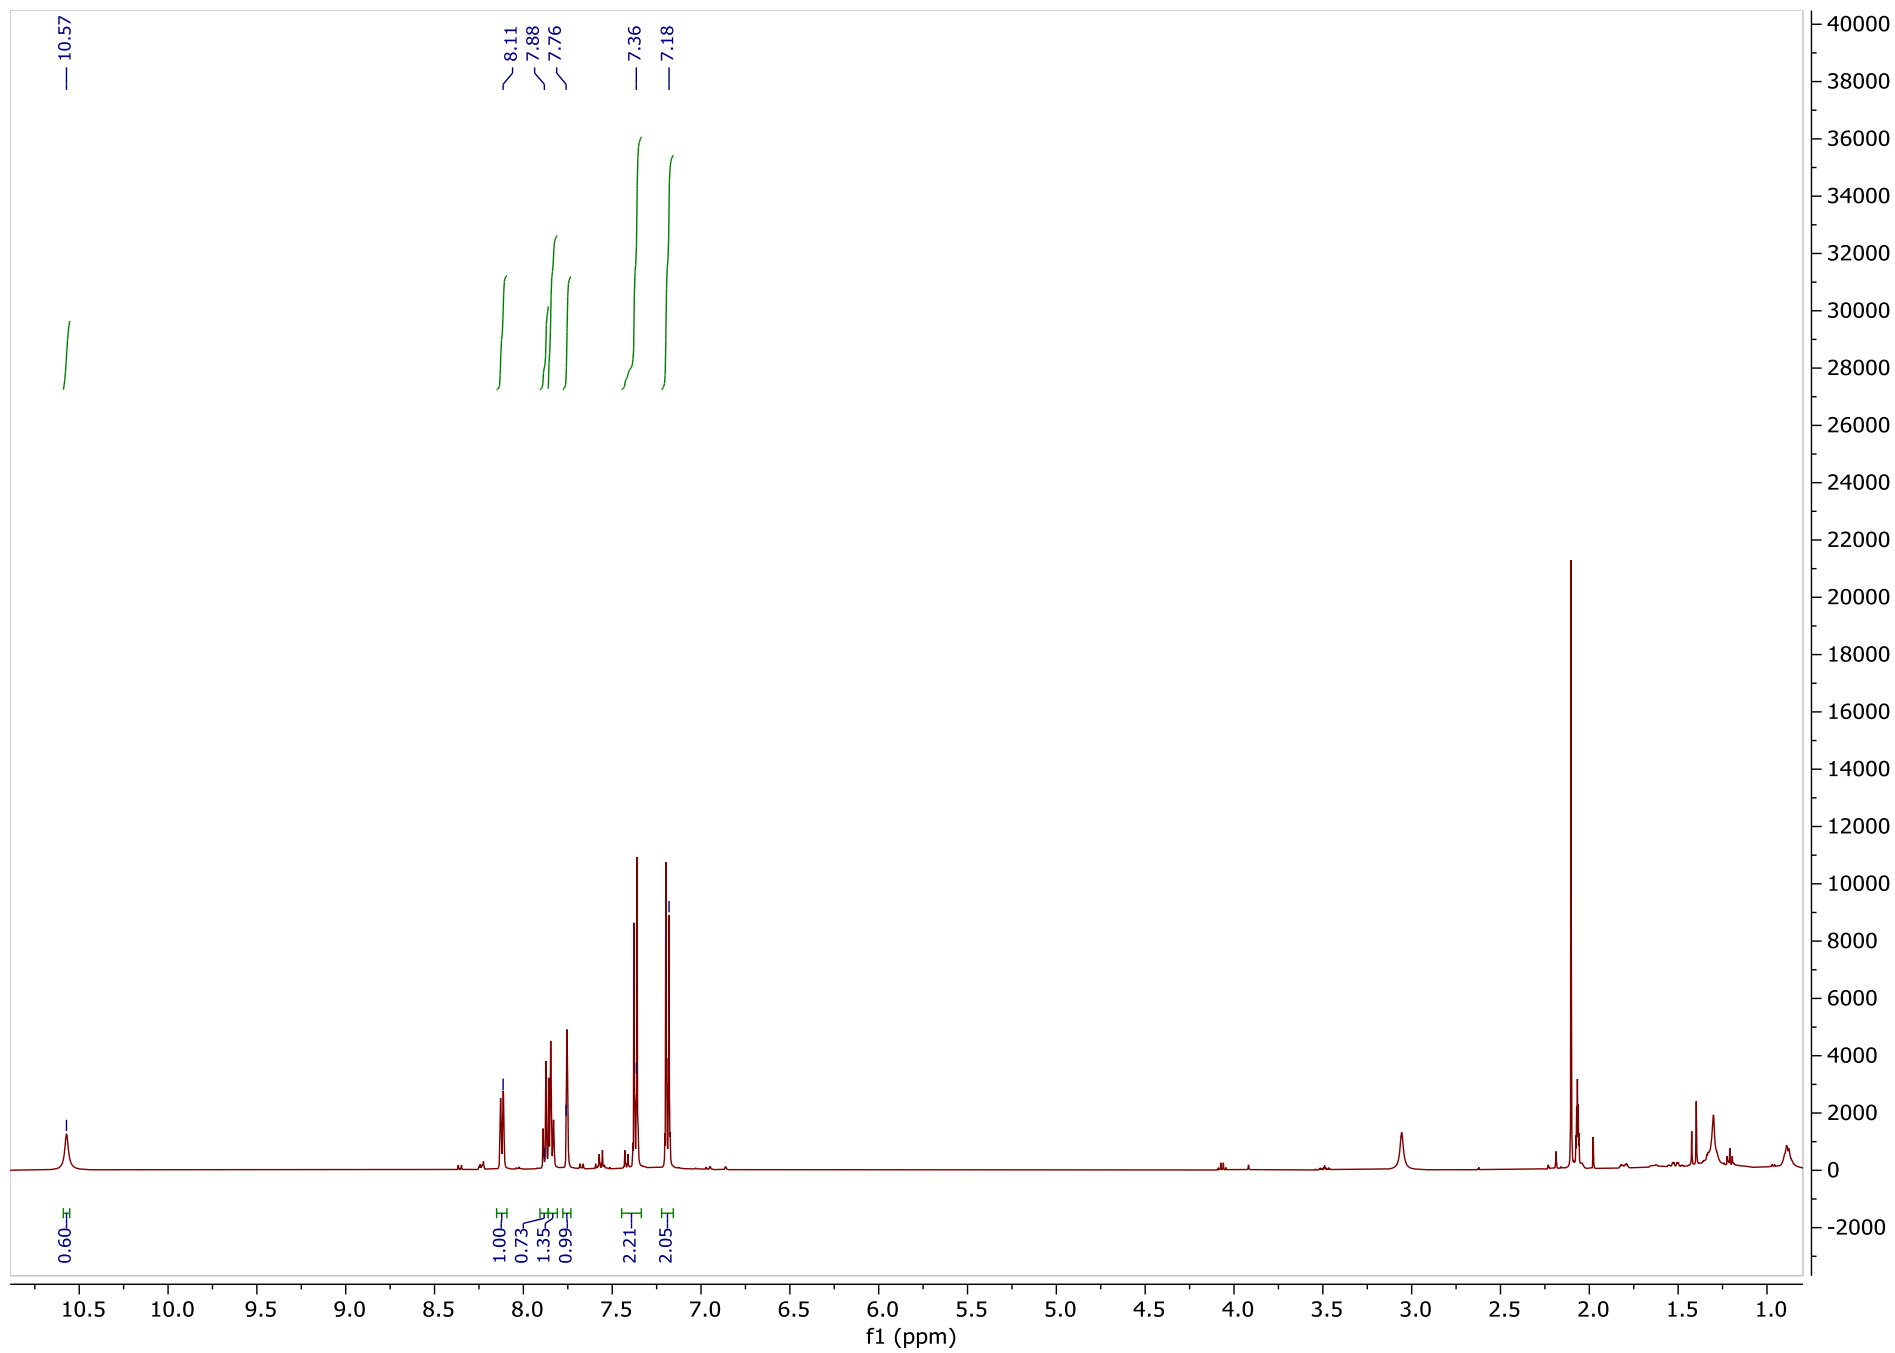

$^{13}\text{C}$  NMR of 4h, acetone, 126 MHz

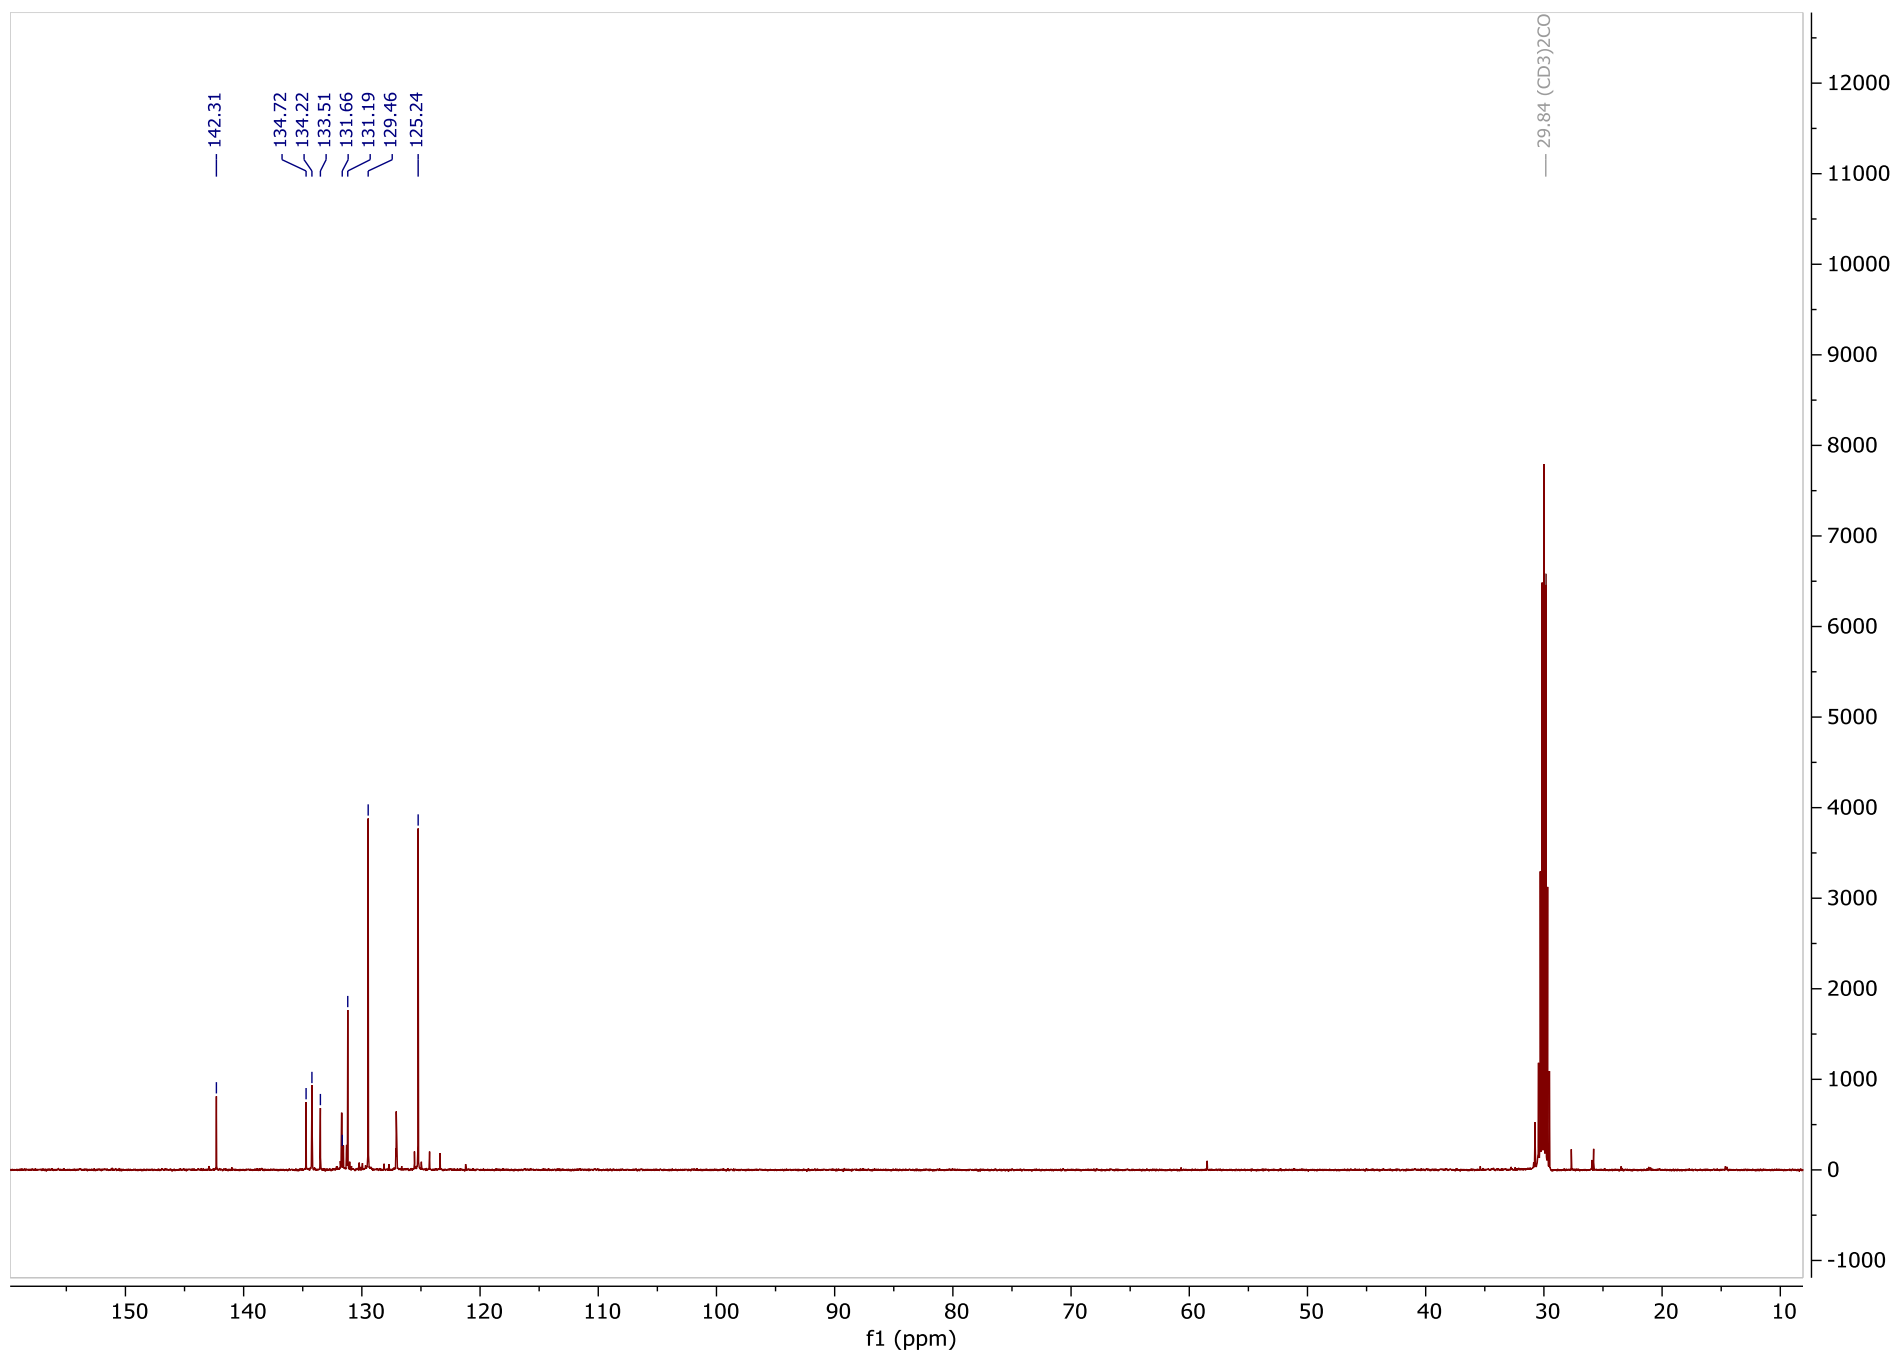

<sup>19</sup>F NMR of 4h, acetone, 471 MHz

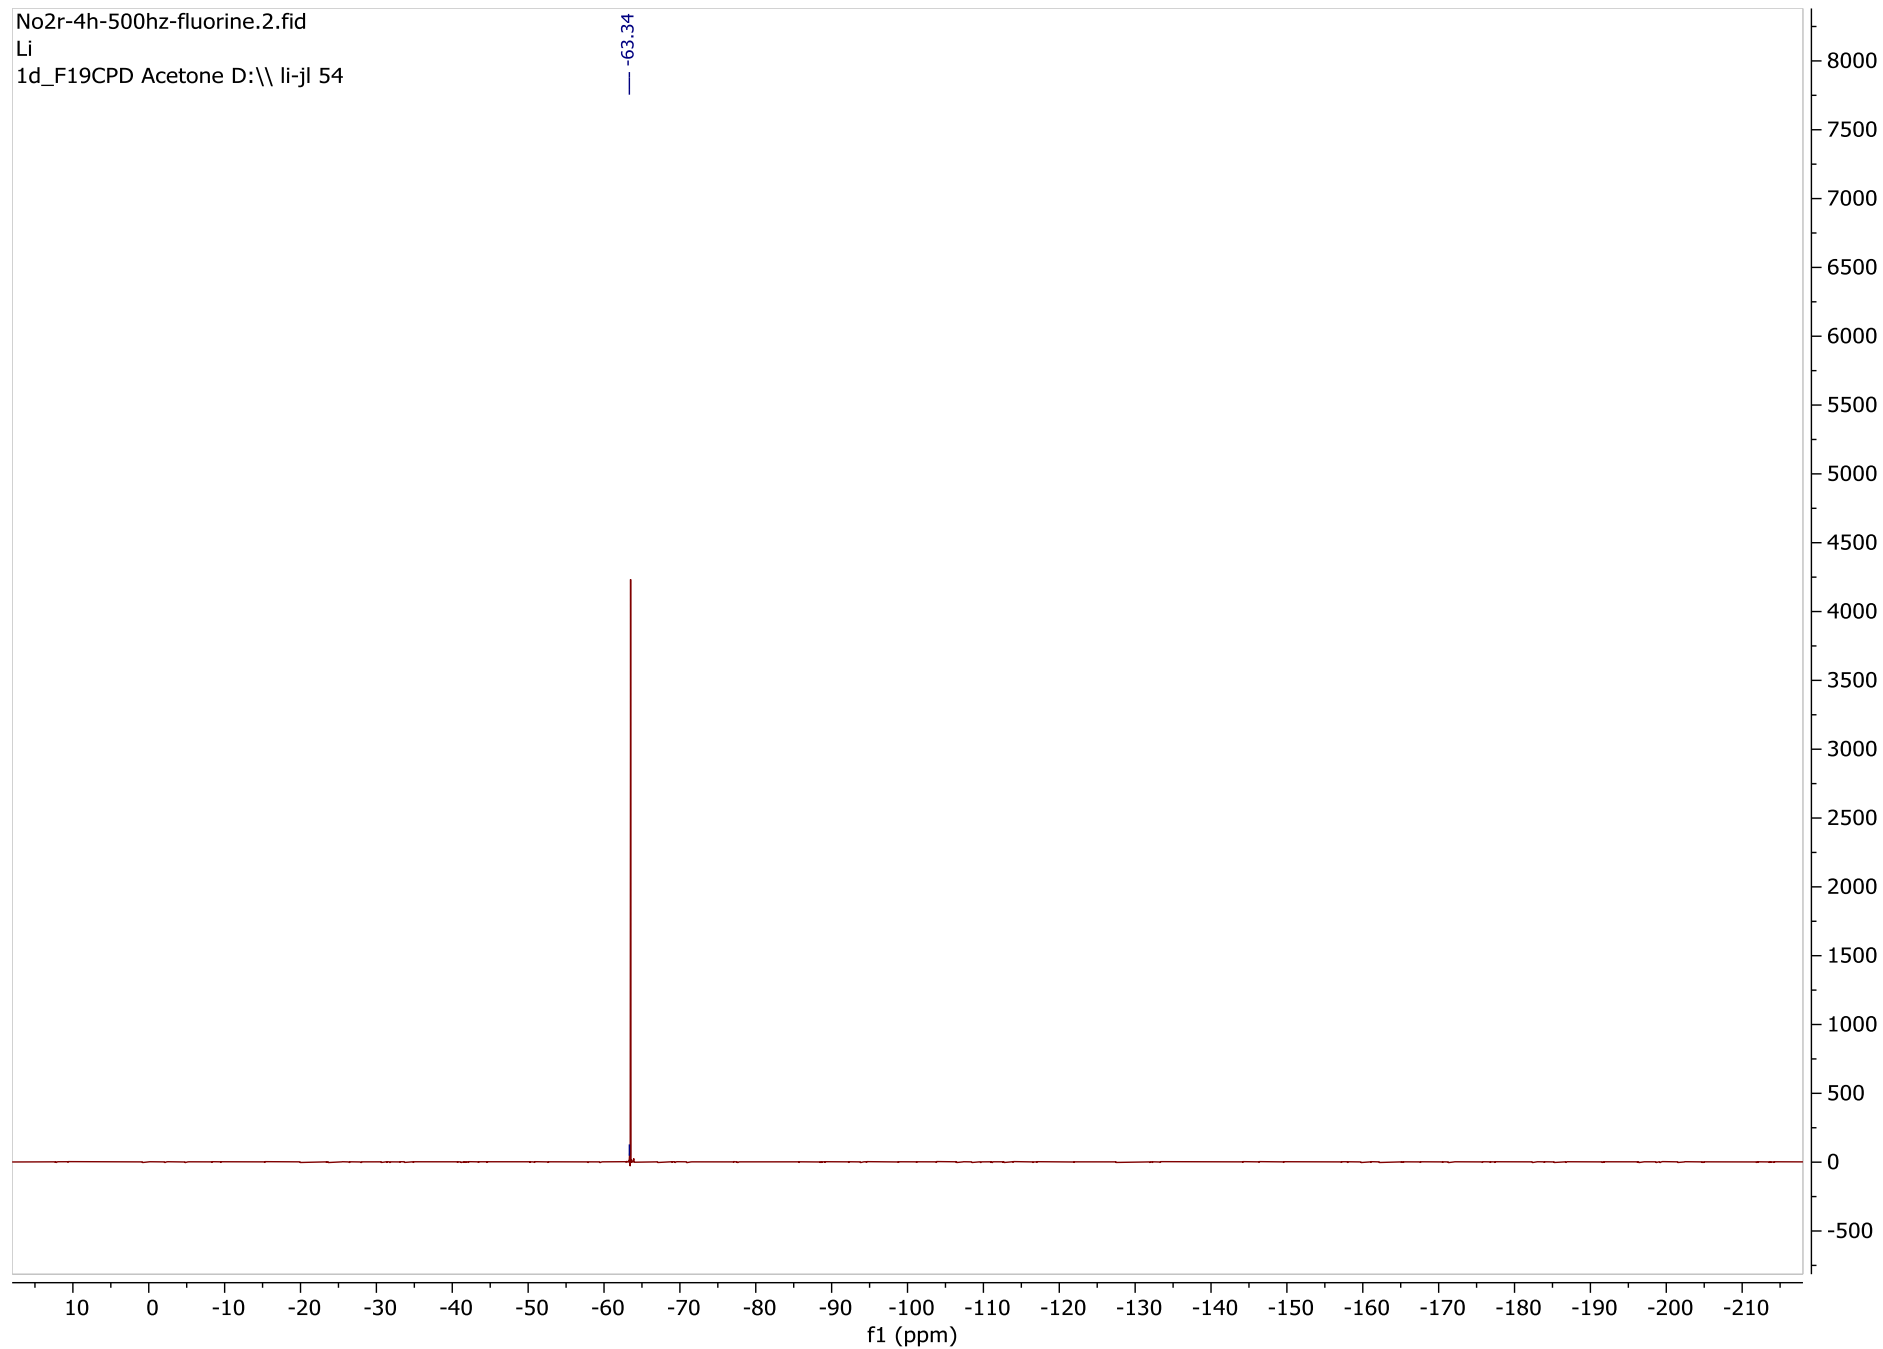

Supplement: d2sc06087f1.pdf [file d2sc06087f1.pdf]
